# Supplementary material for: Photoinduced defluorinative alkylation of trifluoromethyl alkenes with carbonyl derivatives by C–C bond scission
Source: Royal Society of Chemistry journal article supplement (doi:10.1039/d3qo01490h), 2023-01-01

# Electronic Supplementary Information

## Photoinduced Defluorinative Alkylation of Trifluoromethyl alkenes with Carbonyl Derivatives by C–C Bond Scission

Lu-Yu Yan, Tian-Zhen Zhang, Ze-Zhong Lv, and Ming-Chen Fu\*

*Anhui Province Key Laboratory of Advanced Catalytic Materials and Reaction  
Engineering, School of Chemistry and Chemical Engineering, Hefei University of  
Technology, Hefei 230009, China.*

E-mail: [mcfu@hfut.edu.cn](mailto:mcfu@hfut.edu.cn)

## Table of Contents

|                                                        |    |
|--------------------------------------------------------|----|
| <b>1. General Information</b>                          | 3  |
| <b>2. Procedure for the Synthesis of Substrates</b>    | 4  |
| <b>3. Investigation of the Key Reaction Parameters</b> | 8  |
| <b>4. General Procedure and Spectral Data</b>          | 11 |
| <b>5. Scaling-up Reaction</b>                          | 42 |
| <b>6. Preliminary Mechanistic Studies</b>              | 43 |
| <b>7. References</b>                                   | 46 |
| <b>8. NMR Spectra</b>                                  | 48 |

## 1. General Information

### 1.1 Analytical Methods

The NMR spectra were recorded on a Bruker 600 MHz spectrometer. The chemical shifts ( $\delta$ ) in  $^1\text{H}$  NMR were reported in ppm relative to tetramethylsilane ( $\text{Me}_4\text{Si}$ ) as internal standard (0.0 ppm) or proton resonance resulting from incomplete deuteration of NMR solvent:  $\text{CDCl}_3$  (7.26 ppm). Coupling constants ( $J$ ) are expressed in hertz.  $^{13}\text{C}$  NMR spectra were recorded at 151 MHz, and the chemical shifts ( $\delta$ ) were reported in ppm relative to  $\text{CDCl}_3$  (77.10 ppm).  $^{19}\text{F}$  NMR spectra were recorded at 564 MHz. HRMS analysis was performed on Finnigan LCQ advantage Max Series MS System. ESI-mass data was acquired using a Thermo LTQ Orbitrap XL Instrument equipped with an ESI source and controlled by Xcalibur software.

### 1.2 Materials

All reactions were carried out in oven-dried Schlenk tubes under argon atmosphere (purity  $\geq 99.99\%$ ) unless otherwise mentioned. Other Commercial reagents were purchased from Adamas-beta, Energy Chemical, TCI and Aldrich. Organic solutions were concentrated under reduced pressure on Buchi rotary evaporator. Flash column chromatographic purification of products was accomplished using forced-flow chromatography on silica gel (200-300 mesh). The Photo Reaction Setup was purchased from Anhui kemi machinery technology Co., Ltd.

## 2. Procedure for the Synthesis of Substrates

### 2.1 Preparation of ketone derived dihydroquinazolinones<sup>1</sup>

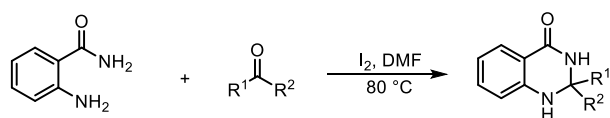

A dry round-bottom flask was charged with 2-aminobenzamides (1.0 equiv.), ketone (1.05 equiv.), I<sub>2</sub> (5 mol%) and DMF (0.67 M). The reaction mixture was stirred at 80 °C for 18 h. After completion of the reaction, as indicated by TLC, and then cooled down to room temperature. Water was added to the mixture, and the generated solid was filtered off. The crude products were washed with water and purified by recrystallization from EtOH to give the desired product.

### 2.2 Preparation of aldehyde-derived 1,4-dihydropyridines (DHPs)<sup>2</sup>

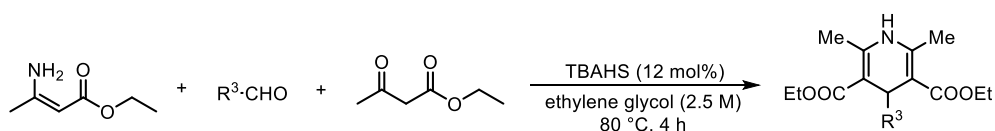

A dry round-bottom flask was charged with ethyl 3-aminocrotonate (1.0 equiv.) and ethylene glycol (2.5 M). Next, ethyl acetoacetate (1.0 equiv.) was added, followed by the aldehyde (1.0 equiv.). Finally, TBAHS (12 mol %) was added in one portion. The flask was closed with a septum and heated at 80 °C for 4 h. At this time, the reaction was cooled to room temperature and diluted with EtOAc. The solution was poured into a separatory funnel containing brine and extracted three times with EtOAc. After drying over anhydrous Na<sub>2</sub>SO<sub>4</sub>, it was filtered and taken to dryness. The residue was purified by column chromatography on silica gel (petroleum ether/ethyl acetate) to give the desired product.

## 2.3 Preparation of trifluoromethyl alkenes

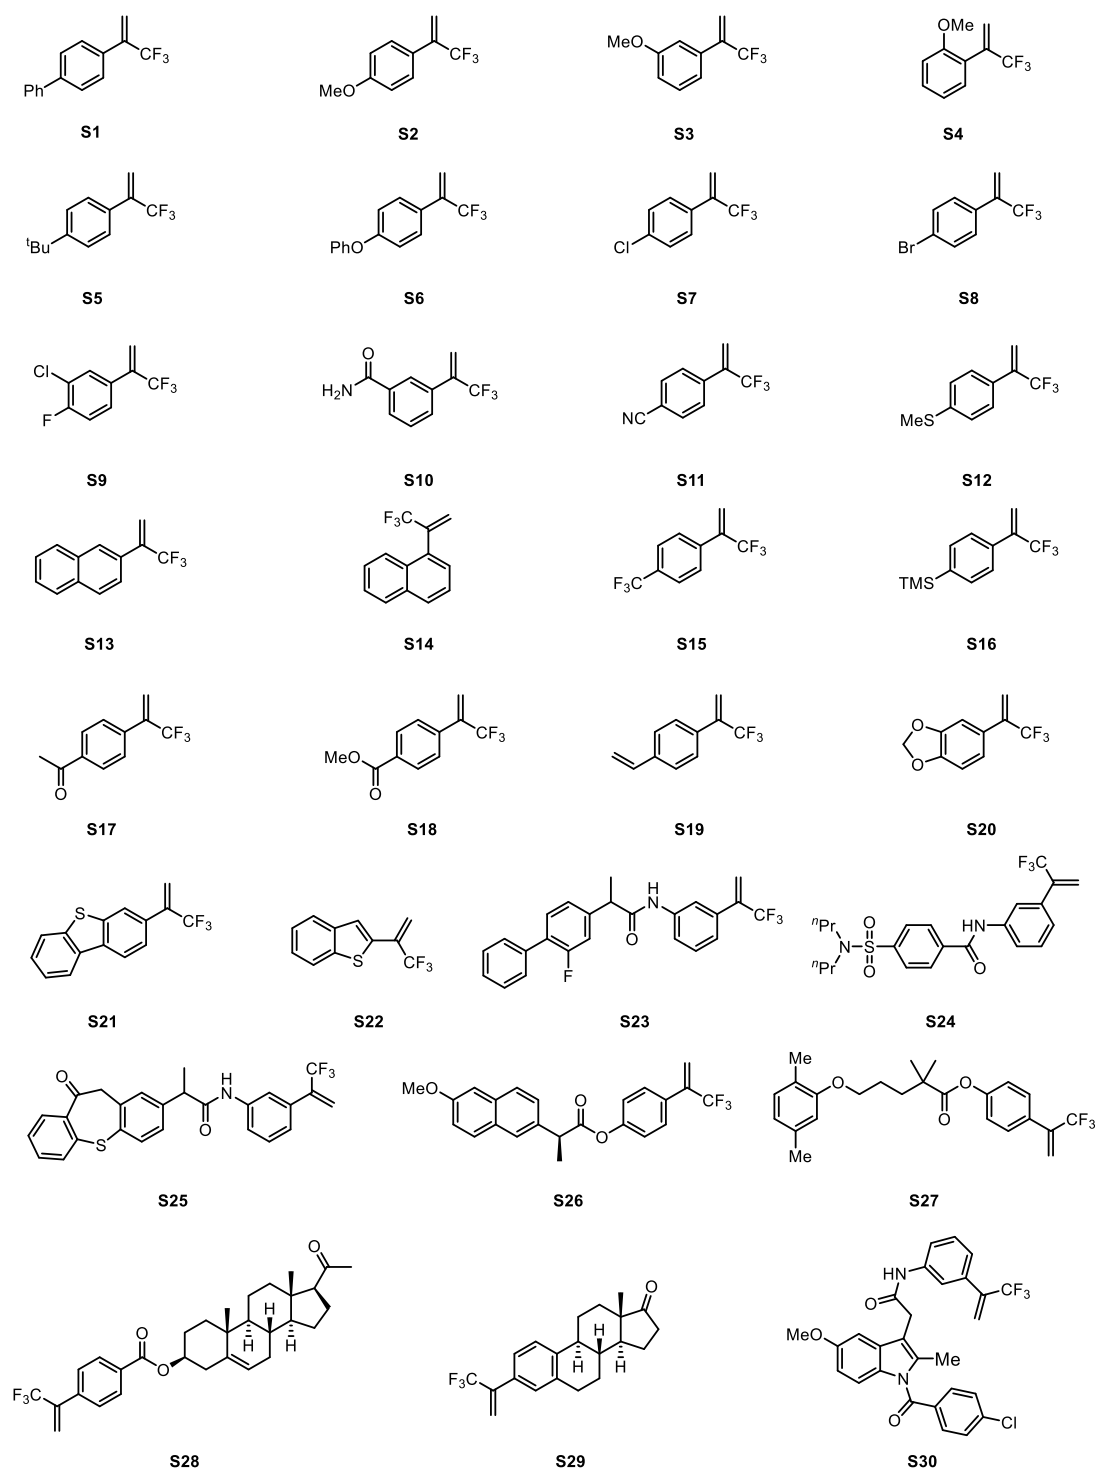

### 1) Preparation of substrates S1-S22<sup>3</sup>

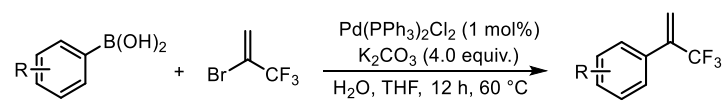

To a Schlenk tube equipped a magnetic stir bar, boronic acid (10 mmol, 1.0 equiv.) and Pd(PPh<sub>3</sub>)<sub>2</sub>Cl<sub>2</sub> (70.2 mg, 1 mol%) were added. The vessel was evacuated and filled with argon (three times), and then THF (30 mL) and aqueous K<sub>2</sub>CO<sub>3</sub> (20 mL) were added. After the addition of 2-bromo-3,3,3-trifluoropropene (2 mL, 20 mmol, 2.0 equiv.), the reaction mixture was stirred at 60 °C for 12 h under argon atmosphere. The resultant mixture was cooled to room temperature, quenched with saturated aqueous NH<sub>4</sub>Cl, and extracted with EtOAc (3 × 30 mL). The combined organic phases were dried over anhydrous Na<sub>2</sub>SO<sub>4</sub>, filtered, and concentrated under reduced pressure. The residue was purified by column chromatography on silica gel (petroleum ether/ethyl acetate) to give the desired trifluoromethyl alkene.

## 2) Preparation of substrates S23-S28<sup>3</sup>

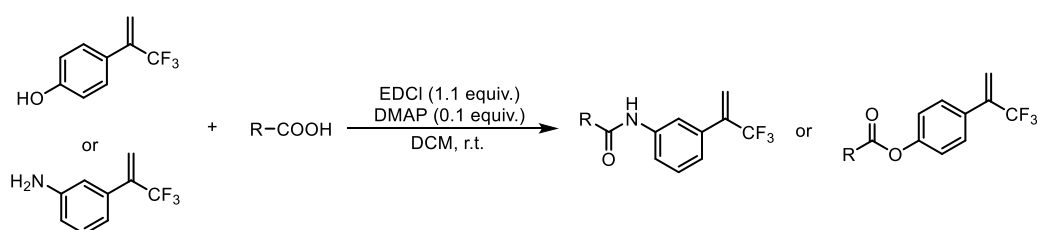

A dry round-bottom flask was charged with carboxylic acid (1.1 equiv.), DMAP (0.1 equiv.) and 4-(3,3,3-trifluoroprop-1-en-2-yl)phenol or 3-(3,3,3-trifluoroprop-1-en-2-yl)aniline (1.0 equiv.), followed by the addition of DCM (0.4 M) and EDCI (1.1 equiv.). The reaction mixture was stirred at room temperature for 12 h (TLC tracking detection). Once complete, the reaction was quenched by water. The organic layer was then separated, dried over anhydrous Na<sub>2</sub>SO<sub>4</sub>, filtered, and concentrated in vacuo. The mixture was purified by column chromatography (petroleum ether/ethyl acetate) to afford the corresponding trifluoromethyl alkenes.

## 3) Preparation of substrates S29<sup>4</sup>

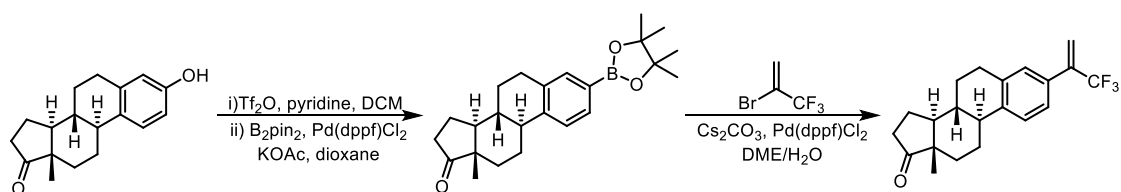

### Step I

To a 50 mL of sealed tube was added estrone (2.7 g, 10 mmol, 1.0 equiv.), which was dissolved in DCM (25 mL). After cooling to 0 °C, Tf<sub>2</sub>O (2.2 mL, 13 mmol, 1.3 equiv.) was added, followed by the addition of pyridine (2.8 mL, 20 mmol, 2.0 equiv.). The mixture was stirred at 0 °C for 1h, slowly warmed to room temperature and quenched by water. The layers were separated and the aqueous layer was extracted with DCM, combined organic layers were dried over anhydrous Na<sub>2</sub>SO<sub>4</sub> and solvent was removed under reduced pressure. The crude mixture was purified by

column chromatography on silica gel (petroleum ether/ethyl acetate = 10:3) to give estrone trifluoromethanesulfonic ester (2.8 g, yield: 70%) which was used in the next step.

## Step II

To a 50 mL Schlenk tube equipped a magnetic stir bar, estrone trifluoromethanesulfonic ester (2.8 g, 7 mmol, 1.0 equiv.), bis(pinacolato)diboron (3.6 g, 14 mmol, 2.0 equiv.), KOAc (2.0 g, 21 mmol, 3.0 equiv.), and Pd(dppf)Cl<sub>2</sub> (205 mg, 4 mol%) were added, the vessel was evacuated and filled with argon (three times), and then dioxane (30 mL) was added. The tube was heated to 120 °C (oil bath). After stirring for 8 h, the reaction mixture was cooled to room temperature and diluted with THF, dried over anhydrous Na<sub>2</sub>SO<sub>4</sub>, then filtered and concentrated. The crude product was purified by column chromatography on silica gel (petroleum ether/ethyl acetate = 5:1) to give the desired boronate pinacol (2.3 g, yield: 86%) which was used in the next step.

## Step III

To a 50 mL Schlenk tube equipped a magnetic stir bar, boronate pinacol (2.3 g, 6 mmol, 1.0 equiv.), Cs<sub>2</sub>CO<sub>3</sub> (2.4 g, 7.2 mmol, 1.2 equiv.), and Pd(dppf)Cl<sub>2</sub> (440 mg, 0.6 mmol, 0.1 equiv.) were added, the vessel was evacuated and filled with argon (three times), and then degassed DME (23.4 mL), degassed, deionized H<sub>2</sub>O (7 mL) and 2-bromo-3,3,3-trifluoroprop-1-ene (1.24 mL, 12 mmol, 2.0 equiv.) were added. The tube was heated to 80 °C (oil bath) for 24 hours. Once completed, the reaction was cooled to room temperature and diluted with EtOAc (50 mL). The resultant crude product was purified by column chromatography on silica gel (petroleum ether/ethyl acetate = 10:1) to give the desired trifluoromethyl alkene (1.33 g, yield: 63%).

## 4) Preparation of substrates S30<sup>5</sup>

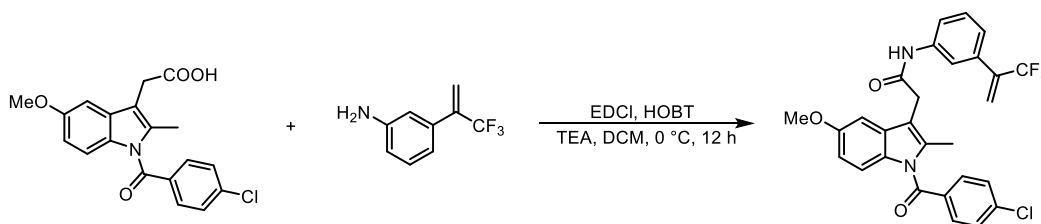

A dry round-bottom flask was charged with 2-(1-(4-chlorobenzoyl)-5-methoxy-2-methyl-1H-indol-3-yl)acetic acid (1.0 equiv.), 3-(3,3,3-trifluoroprop-1-en-2-yl)aniline (1.0 equiv.) and HOBT (1.2 equiv.), followed by the addition of DCM (0.25 M), TEA (2.0 equiv.) and EDCI (1.2 equiv.). The reaction mixture was stirred at 0 °C for 12 h (TLC tracking detection). Once complete, the reaction was quenched by water. The organic layer was then separated, dried over anhydrous Na<sub>2</sub>SO<sub>4</sub>, filtered, and concentrated in vacuo. The mixture was purified by column chromatography (petroleum ether/ethyl acetate = 3:1) to afford the corresponding trifluoromethyl alkene.

### 3. Investigation of the Key Reaction Parameters

**Table S1. Screening of bases**

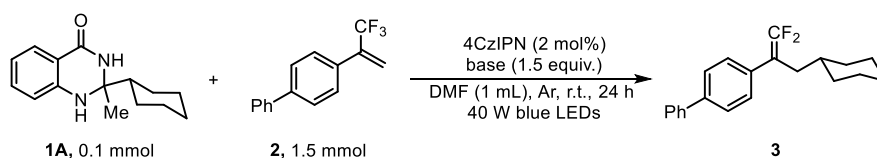

| entry | base                             | yield (%) |
|-------|----------------------------------|-----------|
| 1     | KOAc                             | 23        |
| 2     | K <sub>2</sub> HPO <sub>4</sub>  | trace     |
| 3     | Na <sub>2</sub> HPO <sub>4</sub> | trace     |
| 4     | K <sub>2</sub> CO <sub>3</sub>   | 85        |
| 5     | Na <sub>2</sub> CO <sub>3</sub>  | 92        |
| 6     | CS <sub>2</sub> CO <sub>3</sub>  | 60        |
| 7     | 2,4,6-collidine                  | trace     |
| 8     | DIPEA                            | n.d.      |

Reaction conditions: **1A** (0.1 mmol, 1.0 equiv.), **2** (0.15 mmol, 1.5 equiv.), 4CzIPN (2 mol%), base (0.15 mmol, 1.5 equiv.), DMF (1 mL), stirred at room temperature for 24 h under 40 W blue LEDs irradiation. Isolated yield. n.d. = not detected.

**Table S2. Screening of solvents**

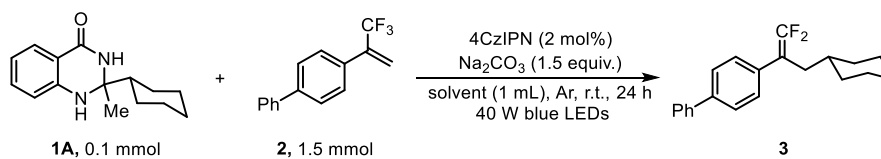

| entry | solvent | yield (%) |
|-------|---------|-----------|
| 1     | DMSO    | 73        |
| 2     | DMA     | 58        |
| 3     | MeCN    | trace     |
| 4     | THF     | trace     |
| 5     | acetone | trace     |
| 6     | EA      | n.d.      |
| 7     | dioxane | n.d.      |
| 8     | toluene | n.d.      |
| 9     | DMF     | 92        |

Reaction conditions: **1A** (0.1 mmol, 1.0 equiv.), **2** (0.15 mmol, 1.5 equiv.), 4CzIPN (2 mol%), Na<sub>2</sub>CO<sub>3</sub> (0.15 mmol, 1.5 equiv.), solvent (1 mL), stirred at room temperature for 24 h under 40 W blue LEDs irradiation. Isolated yield. n.d. = not detected.



**Table S3. Screening of catalyst**

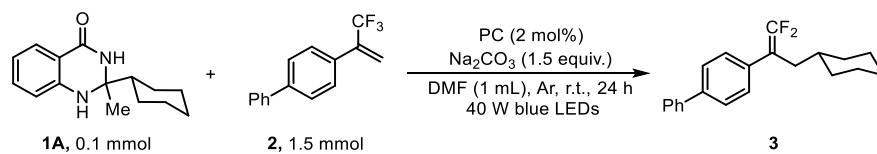

| entry | catalyst                                                                    | yield (%) |
|-------|-----------------------------------------------------------------------------|-----------|
| 1     | $[\text{Ir}(\text{dFppy})_2(\text{dtbbpy})]\text{PF}_6$                     | 70        |
| 2     | $[\text{Ir}(\text{dtbbpy})(\text{ppy})_2]\text{PF}_6$                       | 70        |
| 3     | $[\text{Ir}(\text{dF}(\text{CF}_3)\text{ppy})_2(\text{dtbbpy})]\text{PF}_6$ | 83        |
| 4     | $\text{Ir}(\text{ppy})_3$                                                   | n.d.      |
| 5     | 4DPAIPN                                                                     | 52        |
| 6     | 3DPA2FBN                                                                    | trace     |
| 7     | 4CzIPN                                                                      | 92        |
| 8     | Eosin Y                                                                     | 8         |

Reaction conditions: **1A** (0.1 mmol, 1.0 equiv.), **2** (0.15 mmol, 1.5 equiv.), PC (2 mol%),  $\text{Na}_2\text{CO}_3$  (0.15 mmol, 1.5 equiv.), DMF (1 mL), stirred at room temperature for 24 h under 40 W blue LEDs irradiation. Isolated yield. n.d. = not detected.

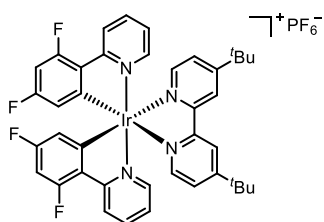

$[\text{Ir}(\text{dFppy})_2(\text{dtbbpy})]\text{PF}_6$

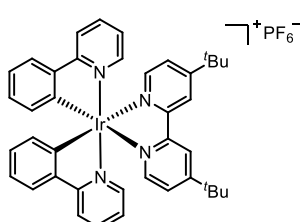

$[\text{Ir}(\text{dtbbpy})(\text{ppy})_2]\text{PF}_6$

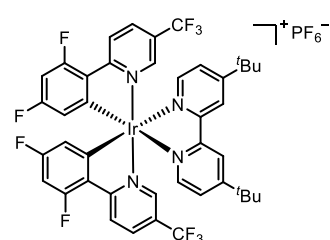

$[\text{Ir}(\text{dF}(\text{CF}_3)\text{ppy})_2(\text{dtbbpy})]\text{PF}_6$

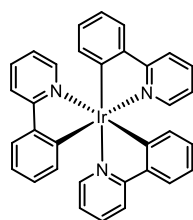

$\text{Ir}(\text{ppy})_3$

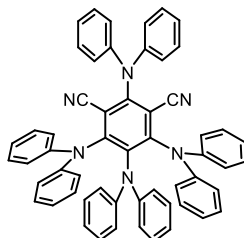

4DPAIPN

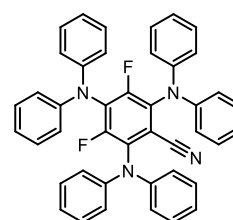

3DPA2FBN

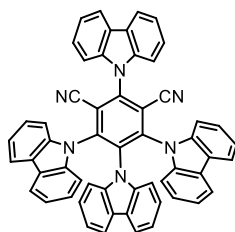

4CzIPN

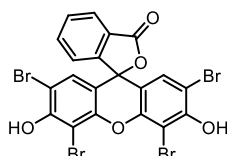

Eosin Y

**Table S4. Control experiments**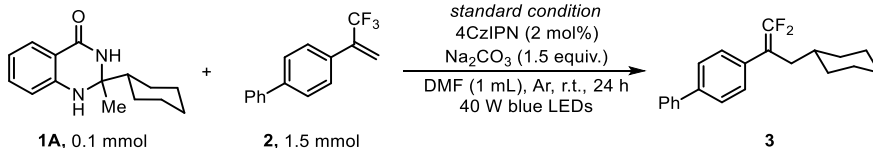

| entry | variation from standard conditions                | yield (%) |
|-------|---------------------------------------------------|-----------|
| 1     | 390 nm blue LEDs                                  | 30        |
| 2     | 420 nm blue LEDs                                  | 74        |
| 3     | 450 nm blue LEDs                                  | 82        |
| 4     | without light                                     | n.d.      |
| 5     | without base                                      | 8         |
| 6     | without PC                                        | n.d.      |
| 7     | reaction time: 15 h                               | 53        |
| 8     | 0.1 mmol Na <sub>2</sub> CO <sub>3</sub>          | 57        |
| 9     | 0.2 mmol Na <sub>2</sub> CO <sub>3</sub>          | 81        |
| 10    | <b>1B</b> instead of <b>1A</b>                    | 56        |
| 11    | <b>1B</b> , Eosin Y instead of <b>1A</b> , 4CzIPN | 83        |

Standard conditions: **1A** (0.1 mmol, 1.0 equiv.), **2** (0.15 mmol, 1.5 equiv.), 4CzIPN (2 mol%), Na<sub>2</sub>CO<sub>3</sub> (0.15 mmol, 1.5 equiv.), in DMF (1 mL), stirred at room temperature for 24 h under 40 W blue LEDs irradiation. Isolated yield. n.d. = not detected.

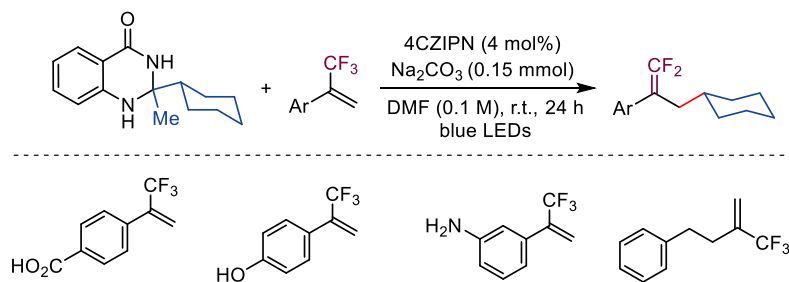**Scheme S1. Failed substrates**

## 4. General Procedure and Spectral Data

### 4.1 General Procedure A

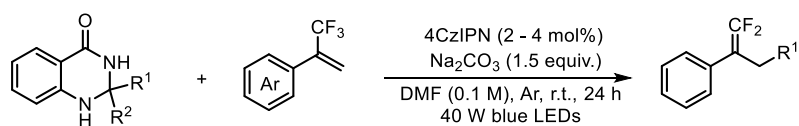

Dihydroquinazolinones (0.1 mmol, 1.0 equiv.), trifluoromethyl alkenes (0.15 mmol, 1.5 equiv.) (if solid), 4CzIPN (2 - 4 mol%), Na<sub>2</sub>CO<sub>3</sub> (0.15 mmol, 1.5 equiv.) were added in 10 mL Schlenk tube equipped with a stirring bar. The tube was evacuated and filled with argon (repeated for three times). To this solid, trifluoromethyl alkenes (1.5 mmol, 1.5 equiv.) (if liquid) and anhydrous DMF (1 mL) were added using a gastight syringe under argon atmosphere. The reaction mixture was stirred under irradiation with 40 W blue LEDs, maintained at approximately room temperature in the air-conditioned room of 25 °C. After 24 h, ethyl acetate (5 mL) was added to the reaction mixture. The resulting solution was washed with brine (3 × 10 mL) and dried over anhydrous Na<sub>2</sub>SO<sub>4</sub>. The organic layers were combined and concentrated on rotary evaporator. The residue was purified by flash column chromatography on silica gel to give the product (Eluent: petroleum ether/ethyl acetate).

### 4.2 General Procedure B

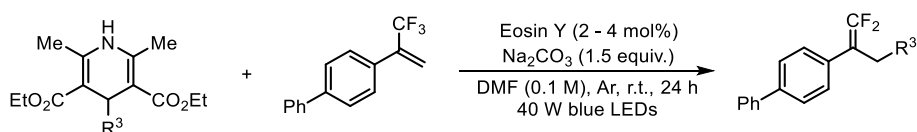

1,4-dihydropyridines (0.1 mmol, 1.0 equiv.) (if solid), 4-(3,3,3-trifluoroprop-1-en-2-yl)-1,1'-biphenyl (0.15 mmol, 1.5 equiv.), Eosin Y (2 - 4 mol%), Na<sub>2</sub>CO<sub>3</sub> (0.15 mmol, 1.5 equiv.) were added in 10 mL Schlenk tube equipped with a stirring bar. The tube was evacuated and filled with argon (repeated for three times). To this solid, 1,4-dihydropyridines (1.0 equiv., 0.1 mmol) (if liquid) and anhydrous DMF (1 mL) were added using a gastight syringe under argon atmosphere. The reaction mixture was stirred under irradiation with 40 W blue LEDs, maintained at approximately room temperature in the air-conditioned room of 25 °C. After 24 h, ethyl acetate (5 mL) was added to the reaction mixture. The resulting solution was washed with brine (3 × 10 mL) and dried over anhydrous Na<sub>2</sub>SO<sub>4</sub>. The organic layers were combined and concentrated on rotary evaporator. The residue was purified by flash column chromatography on silica gel to give the product (Eluent: petroleum ether/ethyl acetate).

## Reaction Setup

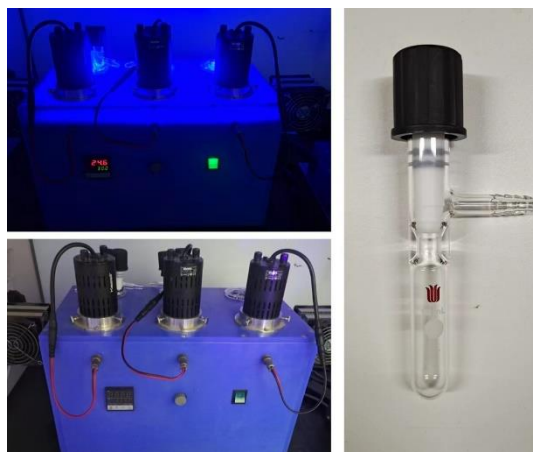

Figure S1 Photo-reaction setup and reaction tube

### 4.3 Characterization data for the products

#### 4-(3-cyclohexyl-1,1-difluoroprop-1-en-2-yl)-1,1'-biphenyl (**3**)<sup>6</sup>

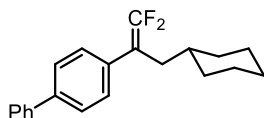

The substrate was prepared following the general procedure A using **S1** (37.3 mg, 0.15 mmol, 1.5 equiv.), 2-cyclohexyl-2-methyl-2,3-dihydroquinazolin-4(1*H*)-one (24.4 mg, 0.1 mmol, 1.0 equiv.), 4CzIPN (1.6 mg, 2 mol%), Na<sub>2</sub>CO<sub>3</sub> (15.9 mg, 0.15 mmol, 1.5 equiv.), anhydrous DMF (1 mL). The product **3** was isolated using flash column chromatography on silica gel (petroleum ether) as a white solid (28.7 mg, 92%).

<sup>1</sup>H NMR (600 MHz, CDCl<sub>3</sub>) δ 7.66 – 7.56 (m, 4H), 7.49 – 7.33 (m, 5H), 2.36 – 2.27 (m, 2H), 1.77 – 1.61 (m, 5H), 1.38 – 1.29 (m, 1H), 1.22 – 1.10 (m, 3H), 1.02 – 0.87 (m, 2H).

<sup>13</sup>C NMR (151 MHz, CDCl<sub>3</sub>) δ 154.06 (dd, *J* = 290.7, 286.2 Hz), 140.58, 139.83, 133.06 (dd, *J* = 4.6, 3.3 Hz), 128.78, 128.59 (t, *J* = 3.3 Hz), 127.34, 127.03, 126.99, 90.77 (dd, *J* = 22.1, 12.2 Hz), 35.73, 35.11, 32.89, 26.41, 26.06.

<sup>19</sup>F NMR (564 MHz, CDCl<sub>3</sub>) δ -90.72 (d, *J* = 43.2 Hz, 1F), -91.27 (d, *J* = 43.3 Hz, 1F).

#### 4-(1,1-difluoro-4-(*p*-tolyl)but-1-en-2-yl)-1,1'-biphenyl (**4**)

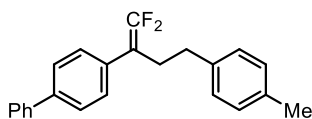

The substrate was prepared following the general procedure A using **S1** (24.8 mg, 0.1 mmol, 1.0 equiv.), 2-methyl-2-(4-methylbenzyl)-2,3-dihydroquinazolin-4(1*H*)-one (53.2 mg, 0.2 mmol, 2.0 equiv.), 4CzIPN (3.2 mg, 4 mol%), Na<sub>2</sub>CO<sub>3</sub> (15.9 mg, 0.15 mmol, 1.5 equiv.), anhydrous DMF (1 mL). The product **4** was isolated using flash column chromatography on silica gel (petroleum ether) as a white solid (23.7 mg, 71%).

<sup>1</sup>H NMR (600 MHz, CDCl<sub>3</sub>) δ 7.69 – 7.59 (m, 4H), 7.50 – 7.35 (m, 5H), 7.11 (d, *J* = 7.9 Hz, 2H), 7.07 (d, *J* = 7.9 Hz, 2H), 2.77 – 2.71 (m, 2H), 2.71 – 2.66 (m, 2H), 2.34 (s, 3H).

<sup>13</sup>C NMR (151 MHz, CDCl<sub>3</sub>) δ 153.81 (dd, *J* = 291.2, 287.2 Hz), 140.55, 140.06, 137.92, 135.56, 132.49 – 132.41 (m), 129.06, 128.81, 128.61 (t, *J* = 3.4 Hz), 128.27, 127.40, 127.16, 127.02, 91.63 (dd, *J* = 21.9, 13.0 Hz), 36.67 (t, *J* = 1.51 Hz), 29.69 (d, *J* = 1.3 Hz), 21.03.

<sup>19</sup>F NMR (564 MHz, CDCl<sub>3</sub>) δ -90.51 (d, *J* = 41.8 Hz, 1F), -90.99 (d, *J* = 41.8 Hz, 1F).

HRMS (ESI) (*m/z*): [M+Na]<sup>+</sup> Calcd for C<sub>23</sub>H<sub>20</sub>F<sub>2</sub>Na<sup>+</sup>, 357.1425; found: 357.1429.

#### 4,4''-(4,4-difluorobut-3-ene-1,3-diyl)di-1,1'-biphenyl (**5**)

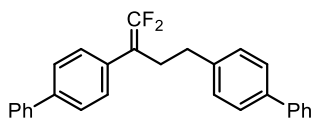

The substrate was prepared following the general procedure A using **S1** (24.8 mg, 0.1 mmol, 1.0 equiv.), 2-([1,1'-biphenyl]-4-ylmethyl)-2-methyl-2,3-dihydroquinazolin-4(1*H*)-one (65.6 mg, 0.2 mmol, 2.0 equiv.), 4CzIPN (3.2 mg, 4 mol%), Na<sub>2</sub>CO<sub>3</sub> (15.9 mg, 0.15 mmol, 1.5 equiv.), anhydrous DMF (1 mL). The product **5** was isolated using flash column chromatography on silica gel (petroleum ether) as a white solid (32.9 mg, 83%).

<sup>1</sup>H NMR (600 MHz, CDCl<sub>3</sub>) δ 7.68 – 7.59 (m, 6H), 7.57 – 7.42 (m, 8H), 7.42 – 7.33 (m, 2H), 7.28 – 7.22 (m, 2H), 2.85 – 2.73 (m, 4H).

<sup>13</sup>C NMR (151 MHz, CDCl<sub>3</sub>) δ 153.86 (dd, *J* = 291.4, 287.4 Hz), 141.00, 140.54, 140.13, 140.10, 139.08, 132.39 (dd, *J* = 4.3, 3.6 Hz), 128.85, 128.83, 128.74, 128.64 (t, *J* = 3.3 Hz), 127.44, 127.21, 127.12, 127.09, 127.04, 127.01, 91.60 (dd, *J* = 21.9, 13.1 Hz), 33.77 (t, *J* = 3.02 Hz), 29.54 (d, *J* = 1.1 Hz).

<sup>19</sup>F NMR (564 MHz, CDCl<sub>3</sub>) δ -86.17 (d, *J* = 41.5 Hz, 1F), -86.66 (d, *J* = 41.5 Hz, 1F).

HRMS (ESI) (m/z): [M+H]<sup>+</sup> Calcd for C<sub>28</sub>H<sub>23</sub>F<sub>2</sub><sup>+</sup>, 397.1762; found: 397.1755.

#### 4-(1,1-difluoro-4-(4-fluorophenyl)but-1-en-2-yl)-1,1'-biphenyl (**6**)

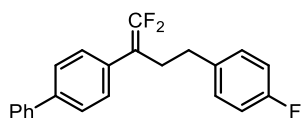

The substrate was prepared following the general procedure A using **S1** (24.8 mg, 0.1 mmol, 1.0 equiv.), 2-(4-fluorobenzyl)-2-methyl-2,3-dihydroquinazolin-4(1*H*)-one (54.0 mg, 0.2 mmol, 2.0 equiv.), 4CzIPN (3.2 mg, 4 mol%), Na<sub>2</sub>CO<sub>3</sub> (15.9 mg, 0.15 mmol, 1.5 equiv.), anhydrous DMF (1 mL). The product **6** was isolated using flash column chromatography on silica gel (petroleum ether) as a colorless oil (26.4 mg, 78%).

<sup>1</sup>H NMR (600 MHz, CDCl<sub>3</sub>) δ 7.65 – 7.58 (m, 4H), 7.49 – 7.35 (m, 5H), 7.14 – 7.06 (m, 2H), 6.97 (t, *J* = 8.7 Hz, 2H), 2.77 – 2.64 (m, 4H).

<sup>13</sup>C NMR (151 MHz, CDCl<sub>3</sub>) δ 161.41 (d, *J* = 243.8 Hz), 153.85 (dd, *J* = 291.5, 287.4 Hz), 140.48, 140.16, 136.52 (d, *J* = 3.3 Hz), 132.23 (dd, *J* = 4.3, 3.6 Hz), 129.80 (d, *J* = 7.9 Hz), 128.83, 128.59 (t, *J* = 3.3 Hz), 127.45, 127.21, 127.01, 115.11 (d, *J* = 21.2 Hz), 91.31 (dd, *J* = 21.8, 13.1 Hz), 33.18 (t, *J* = 2.2 Hz), 29.59.

<sup>19</sup>F NMR (564 MHz, CDCl<sub>3</sub>) δ -90.42 (d, *J* = 41.4 Hz, 1F), -90.82 (d, *J* = 41.4 Hz, 1F), -116.02 – -118.66 (m, 1F).

HRMS (ESI) (m/z): [M+Na]<sup>+</sup> Calcd for C<sub>22</sub>H<sub>17</sub>F<sub>3</sub>Na<sup>+</sup>, 361.1175; found: 361.1171.

#### 4-(4-(4-chlorophenyl)-1,1-difluorobut-1-en-2-yl)-1,1'-biphenyl (**7**)

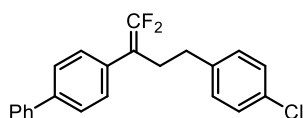

The substrate was prepared following the general procedure A using **S1** (24.8 mg, 0.1 mmol, 1.0 equiv.), 2-(4-chlorobenzyl)-2-methyl-2,3-dihydroquinazolin-4(1*H*)-one (57.2 mg, 0.2 mmol, 2.0

equiv.), 4CzIPN (3.2 mg, 4 mol%), Na<sub>2</sub>CO<sub>3</sub> (15.9 mg, 0.15 mmol, 1.5 equiv.), anhydrous DMF (1 mL). The product **7** was isolated using flash column chromatography on silica gel (petroleum ether) as a colorless oil (24.8 mg, 70%).

**<sup>1</sup>H NMR (600 MHz, CDCl<sub>3</sub>)** δ 7.66 – 7.57 (m, 4H), 7.51 – 7.34 (m, 5H), 7.27 – 7.23 (m, 2H), 7.12 – 7.04 (m, 2H), 2.76 – 2.71 (m, 2H), 2.70 – 2.65 (m, 2H).

**<sup>13</sup>C NMR (151 MHz, CDCl<sub>3</sub>)** δ 153.83 (dd, *J* = 291.5, 287.4 Hz), 140.46, 140.19, 139.32, 132.17 – 132.09 (m), 131.85, 129.79, 128.83, 128.58 (t, *J* = 3.3 Hz), 128.46, 127.46, 127.22, 127.01, 91.24 (dd, *J* = 21.8, 13.3 Hz), 33.32 (t, *J* = 3.02), 29.35.

**<sup>19</sup>F NMR (564 MHz, CDCl<sub>3</sub>)** δ -90.31 (d, *J* = 41.2 Hz, 1F), -90.73 (d, *J* = 41.2 Hz, 1F).

**HRMS (ESI) (m/z):** [M+Na]<sup>+</sup> Calcd for C<sub>22</sub>H<sub>17</sub>ClF<sub>2</sub>Na<sup>+</sup>, 377.0879; found: 377.0885.

#### 4-(1,1-difluoro-4-phenylbut-1-en-2-yl)-1,1'-biphenyl (**8**)<sup>7</sup>

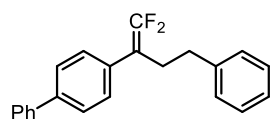

The substrate was prepared following the general procedure A using **S1** (24.8 mg, 0.1 mmol, 1.0 equiv.), 2-benzyl-2-phenyl-2,3-dihydroquinazolin-4(1*H*)-one (62.8 mg, 0.2 mmol, 2.0 equiv.), 4CzIPN (3.2 mg, 4 mol%), Na<sub>2</sub>CO<sub>3</sub> (15.9 mg, 0.15 mmol, 1.5 equiv.), anhydrous DMF (1 mL). The product **8** was isolated using flash column chromatography on silica gel (petroleum ether) as a colorless oil (20.5 mg, 64%).

**<sup>1</sup>H NMR (600 MHz, CDCl<sub>3</sub>)** δ 7.66 – 7.60 (m, 4H), 7.51 – 7.45 (m, 2H), 7.44 – 7.36 (m, 3H), 7.34 – 7.28 (m, 2H), 7.24 – 7.15 (m, 3H), 2.80 – 2.70 (m, 4H).

**<sup>13</sup>C NMR (151 MHz, CDCl<sub>3</sub>)** δ 153.83 (dd, *J* = 291.3, 287.3 Hz), 141.00, 140.54, 140.09, 132.43 – 132.36 (m), 128.82, 128.61 (t, *J* = 3.4 Hz), 128.42, 128.39, 127.42, 127.19, 127.02, 126.11, 91.55 (dd, *J* = 21.9, 13.0 Hz), 34.10 (t, *J* = 2.6 Hz), 29.58 (d, *J* = 1.4 Hz).

**<sup>19</sup>F NMR (564 MHz, CDCl<sub>3</sub>)** δ -90.45 (d, *J* = 41.6 Hz), -90.92 (d, *J* = 41.6 Hz).

#### 4-(5-(3,4-dimethoxyphenyl)-1,1-difluoropent-1-en-2-yl)-1,1'-biphenyl (**9**)

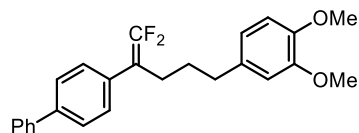

The substrate was prepared following the general procedure A using **S1** (24.8 mg, 0.1 mmol, 1.0 equiv.), 2-(3,4-dimethoxyphenethyl)-2-methyl-2,3-dihydroquinazolin-4(1*H*)-one (48.9 mg, 0.15 mmol, 1.5 equiv.), 4CzIPN (3.2 mg, 4 mol%), Na<sub>2</sub>CO<sub>3</sub> (15.9 mg, 0.15 mmol, 1.5 equiv.), anhydrous DMF (1 mL). The product **9** was isolated using flash column chromatography on silica gel (petroleum ether/ethyl acetate = 20:1) as a colorless oil (18.9 mg, 48%).

**<sup>1</sup>H NMR (600 MHz, CDCl<sub>3</sub>)** δ 7.61 – 7.57 (m, 4H), 7.48 – 7.32 (m, 5H), 6.78 (d, *J* = 8.1 Hz, 1H), 6.70 – 6.62 (m, 2H), 3.85 (s, 3H), 3.83 (s, 3H), 2.59 (t, *J* = 7.6 Hz, 2H), 2.49 – 2.45 (m, 2H), 1.76 – 1.69 (m, 2H).

**<sup>13</sup>C NMR (151 MHz, CDCl<sub>3</sub>)** δ 153.65 (dd, *J* = 290.8, 287.0 Hz), 148.75, 147.14, 140.50, 140.01, 134.40, 132.52 (dd, *J* = 4.0, 3.1 Hz), 128.80, 128.57 (t, *J* = 3.3 Hz), 127.40, 127.08, 126.97, 120.17, 111.58, 111.12, 91.91 (dd, *J* = 21.6, 13.0 Hz), 55.91, 55.75, 34.74, 29.52 (t, *J* = 2.2 Hz), 27.00.

**<sup>19</sup>F NMR (564 MHz, CDCl<sub>3</sub>)** δ -90.84 (d, *J* = 43.0 Hz, 1F), -91.03 (d, *J* = 43.0 Hz, 1F).

**HRMS (ESI) (m/z):** [M+Na]<sup>+</sup> Calcd for C<sub>25</sub>H<sub>24</sub>F<sub>2</sub>NaO<sub>2</sub><sup>+</sup>, 417.1637; found: 417.1631.

#### 4-(1,1-difluoro-4-(4-(trifluoromethyl)phenyl)but-1-en-2-yl)-1,1'-biphenyl (10)

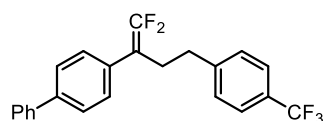

The substrate was prepared following the general procedure A using **S1** (24.8 mg, 0.1 mmol, 1.0 equiv.), 2-methyl-2-(4-(trifluoromethyl)benzyl)-2,3-dihydroquinazolin-4(1*H*)-one (64.0 mg, 0.2 mmol, 2.0 equiv.), 4CzIPN (3.2 mg, 4 mol%), Na<sub>2</sub>CO<sub>3</sub> (15.9 mg, 0.15 mmol, 1.5 equiv.), anhydrous DMF (1 mL). The product **10** was isolated using flash column chromatography on silica gel (petroleum ether) as a colorless oil (27.5 mg, 71%).

**<sup>1</sup>H NMR (600 MHz, CDCl<sub>3</sub>)** δ 7.70 – 7.58 (m, 4H), 7.47 (t, *J* = 7.7 Hz, 3H), 7.43 – 7.32 (m, 6H), 2.78 (s, 4H).

**<sup>13</sup>C NMR (151 MHz, CDCl<sub>3</sub>)** δ 153.87 (dd, *J* = 291.6, 287.7 Hz), 141.71, 140.46, 140.28, 132.04 – 131.96 (m), 131.86 (d, *J* = 0.9 Hz), 130.63 (q, *J* = 32.0 Hz), 128.84, 128.79, 128.60 (t, *J* = 3.3 Hz), 127.48, 127.27, 127.02, 125.22 (q, *J* = 3.8 Hz), 123.04 (q, *J* = 3.9 Hz), 91.14 (dd, *J* = 21.7, 13.5 Hz), 33.77 (t, *J* = 2.3 Hz), 29.21 (d, *J* = 1.3 Hz).

**<sup>19</sup>F NMR (564 MHz, CDCl<sub>3</sub>)** δ -62.59 (s, 3F), -90.29 (d, *J* = 41.0 Hz, 1F), -90.68 (d, *J* = 40.7 Hz, 1F).

**HRMS (ESI) (m/z):** [M+Na]<sup>+</sup> Calcd for C<sub>23</sub>H<sub>17</sub>F<sub>5</sub>Na<sup>+</sup>, 411.1143; found: 411.1149.

#### 4-(1,1-difluoro-4-(4-methoxyphenyl)but-1-en-2-yl)-1,1'-biphenyl (11)

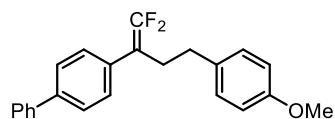

The substrate was prepared following the general procedure A using **S1** (24.8 mg, 0.1 mmol, 1.0 equiv.), 2-(4-methoxybenzyl)-2-methyl-2,3-dihydroquinazolin-4(1*H*)-one (56.4 mg, 0.2 mmol, 2.0 equiv.), 4CzIPN (3.2 mg, 4 mol%), Na<sub>2</sub>CO<sub>3</sub> (15.9 mg, 0.15 mmol, 1.5 equiv.), anhydrous DMF (1 mL). The product **11** was isolated using flash column chromatography on silica gel (petroleum ether) as a colorless oil (17.5 mg, 50%).



**<sup>1</sup>H NMR (600 MHz, CDCl<sub>3</sub>)** δ 7.65 – 7.60 (m, 4H), 7.42 (m, 5H), 7.09 (d, *J* = 8.5 Hz, 2H), 6.84 (d, *J* = 8.5 Hz, 2H), 3.80 (s, 3H), 2.99 – 2.49 (m, 4H).

**<sup>13</sup>C NMR (151 MHz, CDCl<sub>3</sub>)** δ 157.93, 153.81 (dd, *J* = 291.3, 287.3 Hz), 140.53, 140.04, 133.06, 132.47 – 132.39 (m), 129.34, 128.82, 128.61 (t, *J* = 3.3 Hz), 127.41, 127.16, 127.02, 113.76, 91.54 (dd, *J* = 22.1, 12.8 Hz), 55.25, 33.15 (t, *J* = 3.02 Hz), 29.77.

**<sup>19</sup>F NMR (564 MHz, CDCl<sub>3</sub>)** δ -90.83 (d, *J* = 43.6 Hz, 1F), -91.24 (d, *J* = 43.5 Hz, 1F).

**HRMS (ESI) (m/z):** [M+Na]<sup>+</sup> Calcd for C<sub>23</sub>H<sub>20</sub>F<sub>2</sub>NaO<sup>+</sup>, 373.1374; found: 373.1365.

#### 4-(4-(2-bromophenyl)-1,1-difluorobut-1-en-2-yl)-1,1'-biphenyl (**12**)

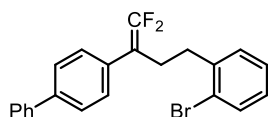

The substrate was prepared following the general procedure A using **S1** (24.8 mg, 0.1 mmol, 1.0 equiv.), 2-(2-bromobenzyl)-2-methyl-2,3-dihydroquinazolin-4(1*H*)-one (66.0 mg, 0.2 mmol, 2.0 equiv.), 4CzIPN (3.2 mg, 4 mol%), Na<sub>2</sub>CO<sub>3</sub> (15.9 mg, 0.15 mmol, 1.5 equiv.), anhydrous DMF (1 mL). The product **12** was isolated using flash column chromatography on silica gel (petroleum ether) as a colorless oil (21.5 mg, 54%).

**<sup>1</sup>H NMR (600 MHz, CDCl<sub>3</sub>)** δ 7.65 – 7.60 (m, 4H), 7.55 – 7.43 (m, 5H), 7.37 (t, *J* = 7.3 Hz, 1H), 7.23 (t, *J* = 7.4 Hz, 1H), 7.17 (d, *J* = 6.4 Hz, 1H), 7.09 – 7.05 (m, 1H), 2.90 – 2.71 (m, 4H).

**<sup>13</sup>C NMR (151 MHz, CDCl<sub>3</sub>)** δ 153.95 (dd, *J* = 292.0, 287.9 Hz), 140.52, 140.27, 140.07, 132.86, 132.27 – 132.18 (m), 130.59, 128.81, 128.56 (t, *J* = 3.5 Hz), 127.93, 127.43, 127.41, 127.14, 127.00, 124.31, 91.38 (dd, *J* = 21.9, 12.9 Hz), 34.78 (dd, *J* = 3.0, 2.2 Hz), 27.82 (d, *J* = 1.5 Hz).

**<sup>19</sup>F NMR (564 MHz, CDCl<sub>3</sub>)** δ -89.74 (d, *J* = 40.3 Hz, 1F), -90.47 (d, *J* = 40.3 Hz, 1F).

**HRMS (ESI) (m/z):** [M+Na]<sup>+</sup> Calcd for C<sub>22</sub>H<sub>17</sub>BrF<sub>2</sub>Na<sup>+</sup>, 421.0374; found: 421.0378.

#### *tert*-butyl 4-(2-([1,1'-biphenyl]-4-yl)-3,3-difluoroallyl)piperidine-1-carboxylate (**13**)<sup>6</sup>

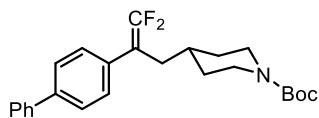

The substrate was prepared following the general procedure A using **S1** (24.8 mg, 0.1 mmol, 1.0 equiv.), *tert*-butyl 4-(2-methyl-4-oxo-1,2,3,4-tetrahydroquinazolin-2-yl)piperidine-1-carboxylate (51.8 mg, 0.15 mmol, 1.5 equiv.), 4CzIPN (3.2 mg, 4 mol%), Na<sub>2</sub>CO<sub>3</sub> (15.9 mg, 0.15 mmol, 1.5 equiv.), anhydrous DMF (1 mL). The product **13** was isolated using flash column chromatography on silica gel (petroleum ether/ethyl acetate = 20:1) as a colorless oil (29.7 mg, 72%).

**<sup>1</sup>H NMR (600 MHz, CDCl<sub>3</sub>)** δ 7.63 – 7.57 (m, 4H), 7.49 – 7.41 (m, 2H), 7.41 – 7.34 (m, 3H), 4.05 (s, 2H), 2.59 (t, *J* = 12.3 Hz, 2H), 2.38 (dt, *J* = 7.2, 2.4 Hz, 2H), 1.73 – 1.59 (m, 2H), 1.53 – 1.42 (m, 10H), 1.20 – 1.08 (m, 2H).

**<sup>13</sup>C NMR (151 MHz, CDCl<sub>3</sub>)** δ 154.77, 154.25 (dd, *J* = 291.4, 286.9 Hz), 140.42, 140.11, 132.53 (dd, *J* = 4.3, 3.6 Hz), 128.81, 128.51 (t, *J* = 3.3 Hz), 127.44, 127.18, 126.98, 90.21 (dd, *J* = 22.1, 12.9 Hz), 79.28, 43.84, 34.28 (t, *J* = 2.2 Hz), 31.73, 28.45. (one carbon signal was overlapped).

**<sup>19</sup>F NMR (564 MHz, CDCl<sub>3</sub>)** δ -90.09 (d, *J* = 41.8 Hz, 1F), -90.56 (d, *J* = 41.8 Hz, 1F).

#### 4-(2-([1,1'-biphenyl]-4-yl)-3,3-difluoroallyl)tetrahydro-2H-pyran (**14**)<sup>6</sup>

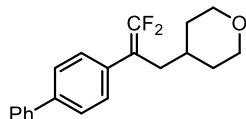

The substrate was prepared following the general procedure A using **S1** (24.8 mg, 0.1 mmol, 1.0 equiv.), 2-methyl-2-(tetrahydro-2H-pyran-4-yl)-2,3-dihydroquinazolin-4(1H)-one (49.2 mg, 0.2 mmol, 2.0 equiv.), 4CzIPN (3.2 mg, 4 mol%), Na<sub>2</sub>CO<sub>3</sub> (15.9 mg, 0.15 mmol, 1.5 equiv.), anhydrous DMF (1 mL). The product **14** was isolated using flash column chromatography on silica gel (petroleum ether/ethyl acetate = 20:1) as a yellow solid (15.7 mg, 50%).

**<sup>1</sup>H NMR (600 MHz, CDCl<sub>3</sub>)** δ 7.63 – 7.58 (m, 4H), 7.49 – 7.33 (m, 5H), 3.96 – 3.87 (m, 2H), 3.32 – 3.24 (m, 2H), 2.47 – 2.33 (m, 2H), 1.62 – 1.52 (m, 3H), 1.38 – 1.29 (m, 2H).

**<sup>13</sup>C NMR (151 MHz, CDCl<sub>3</sub>)** δ 154.15 (dd, *J* = 291.2, 286.9 Hz), 140.43, 140.09, 132.57 (dd, *J* = 5.1, 2.6 Hz), 128.81, 128.52 (t, *J* = 3.3 Hz), 127.44, 127.17, 126.98, 90.05 (dd, *J* = 22.1, 12.9 Hz), 67.79, 34.60, 33.24 (t, *J* = 2.4 Hz), 32.63.

**<sup>19</sup>F NMR (564 MHz, CDCl<sub>3</sub>)** δ -90.17 (d, *J* = 41.5 Hz, 1F), -90.59 (d, *J* = 42.2 Hz, 1F).

#### 4-(3-cyclopentyl-1,1-difluoroprop-1-en-2-yl)-1,1'-biphenyl (**15**)<sup>6</sup>

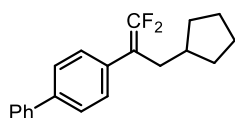

The substrate was prepared following the general procedure A using **S1** (24.8 mg, 0.1 mmol, 1.0 equiv.), 2-cyclopentyl-2-methyl-2,3-dihydroquinazolin-4(1H)-one (46.0 mg, 0.2 mmol, 2.0 equiv.), 4CzIPN (3.2 mg, 4 mol%), Na<sub>2</sub>CO<sub>3</sub> (15.9 mg, 0.15 mmol, 1.5 equiv.), anhydrous DMF (1 mL). The product **15** was isolated using flash column chromatography on silica gel (petroleum ether) as a white solid (20.1 mg, 67%).

**<sup>1</sup>H NMR (600 MHz, CDCl<sub>3</sub>)** δ 7.64 – 7.57 (m, 4H), 7.47 – 7.33 (m, 5H), 2.43 (dt, *J* = 7.2, 2.4 Hz, 2H), 1.94 – 1.80 (m, 1H), 1.77 – 1.66 (m, 2H), 1.65 – 1.59 (m, 2H), 1.53 – 1.42 (m, 2H), 1.23 – 1.10 (m, 2H).

**<sup>13</sup>C NMR (151 MHz, CDCl<sub>3</sub>)** δ 153.93 (dd, *J* = 290.1, 286.1 Hz), 140.59, 139.90, 132.95 (dd, *J* = 4.5, 3.1 Hz), 128.77, 128.68 (t, *J* = 3.2 Hz), 127.33, 127.02, 127.00, 92.03 (dd, *J* = 22.0, 12.3 Hz), 38.26 (t, *J* = 2.3 Hz), 33.46, 32.15, 24.98.

**<sup>19</sup>F NMR (564 MHz, CDCl<sub>3</sub>)** δ -91.57 (d, *J* = 44.4 Hz, 1F), -91.98 (d, *J* = 44.4 Hz, 1F).

#### 4-(1,1-difluoro-4-methylhex-1-en-2-yl)-1,1'-biphenyl (**16**)<sup>6</sup>

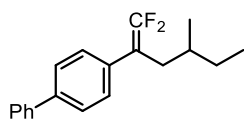

The substrate was prepared following the general procedure A using **S1** (24.8 mg, 0.1 mmol, 1.0 equiv.), 2-(*sec*-butyl)-2-methyl-2,3-dihydroquinazolin-4(1*H*)-one (32.7 mg, 0.15 mmol, 1.5 equiv.), 4CzIPN (3.2 mg, 4 mol%), Na<sub>2</sub>CO<sub>3</sub> (15.9 mg, 0.15 mmol, 1.5 equiv.), anhydrous DMF (1 mL). The product **16** was isolated using flash column chromatography on silica gel (petroleum ether) as a colorless oil (21.7 mg, 76%).

<sup>1</sup>H NMR (600 MHz, CDCl<sub>3</sub>) δ 7.63 – 7.57 (m, 4H), 7.48 – 7.42 (m, 2H), 7.42 – 7.33 (m, 3H), 2.47 – 2.41 (m, 1H), 2.27 – 2.21 (m, 1H), 1.45 – 1.36 (m, 2H), 1.23 – 1.13 (m, 1H), 0.90 – 0.85 (m, 6H).

<sup>13</sup>C NMR (151 MHz, CDCl<sub>3</sub>) δ 154.04 (dd, *J* = 290.4, 286.3 Hz), 140.57, 139.87, 132.90 (dd, *J* = 4.3, 3.5 Hz), 128.78, 128.62 (t, *J* = 3.2 Hz), 127.34, 127.04, 127.00, 91.25 (dd, *J* = 22.0, 12.4 Hz), 34.49, 32.65 (t, *J* = 2.2 Hz), 29.07, 18.62, 11.27.

<sup>19</sup>F NMR (564 MHz, CDCl<sub>3</sub>) δ -91.05 (d, *J* = 43.6 Hz, 1F), -91.37 (d, *J* = 43.6 Hz, 1F).

#### 4-(1,1-difluoro-4,4-dimethylpent-1-en-2-yl)-1,1'-biphenyl (**17**)<sup>8</sup>

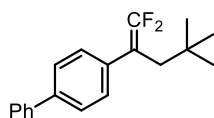

The substrate was prepared following the general procedure A using **S1** (24.8 mg, 0.1 mmol, 1.0 equiv.), 2-(*tert*-butyl)-2-methyl-2,3-dihydroquinazolin-4(1*H*)-one (43.6 mg, 0.2 mmol, 2.0 equiv.), 4CzIPN (3.2 mg, 4 mol%), Na<sub>2</sub>CO<sub>3</sub> (15.9 mg, 0.15 mmol, 1.5 equiv.), anhydrous DMF (1 mL). The product **17** was isolated using flash column chromatography on silica gel (petroleum ether) as a white solid (17.4 mg, 61%).

<sup>1</sup>H NMR (600 MHz, CDCl<sub>3</sub>) δ 7.59 (dd, *J* = 20.8, 7.8 Hz, 4H), 7.48 – 7.32 (m, 5H), 2.38 (s, 2H), 0.84 (s, 9H).

<sup>13</sup>C NMR (151 MHz, CDCl<sub>3</sub>) δ 154.43 (dd, *J* = 290.3, 287.8 Hz), 140.54, 139.66, 134.55 (dd, *J* = 4.6, 2.9 Hz), 128.77, 128.75, 127.31, 126.96, 126.89, 90.81 (dd, *J* = 21.5, 12.6 Hz), 41.03, 32.77 (t, *J* = 2.5 Hz), 29.77.

<sup>19</sup>F NMR (564 MHz, CDCl<sub>3</sub>) δ -89.32 (d, *J* = 40.3 Hz, 1F), -91.99 (d, *J* = 40.3 Hz, 1F).

#### (3*r*,5*r*,7*r*)-1-(3,3-difluoro-2-(naphthalen-2-yl)allyl)adamantane (**18**)<sup>9</sup>

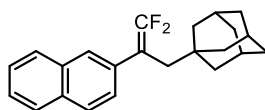

The substrate was prepared following the general procedure A using **S13** (33.3 mg, 0.15 mmol, 1.5 equiv.), 2-((3*r*,5*r*,7*r*)-adamantan-1-yl)-2-methyl-2,3-dihydroquinazolin-4(1*H*)-one (29.6 mg, 0.1

mmol, 1.0 equiv.), 4CzIPN (3.2 mg, 4 mol%), Na<sub>2</sub>CO<sub>3</sub> (15.9 mg, 0.15 mmol, 1.5 equiv.), anhydrous DMF (1 mL). The product **18** was isolated using flash column chromatography on silica gel (petroleum ether) as a white solid (28.4 mg, 84%).

**<sup>1</sup>H NMR (600 MHz, CDCl<sub>3</sub>)** δ 7.92 – 7.76 (m, 4H), 7.55 – 7.41 (m, 3H), 2.32 (t, 2H), 1.85 (br s, 3H), 1.64 – 1.50 (m, 6H), 1.44 – 1.38 (m, 6H).

**<sup>13</sup>C NMR (151 MHz, CDCl<sub>3</sub>)** δ 154.58 (dd, *J* = 291.0, 287.6 Hz), 133.37 (dd, *J* = 4.7, 3.1 Hz), 133.21, 132.28, 127.88, 127.77, 127.58, 127.19 (t, *J* = 3.0 Hz), 126.48 (t, *J* = 2.8 Hz), 126.12, 125.90, 89.83 (dd, *J* = 22.0, 12.3 Hz), 42.67, 41.99, 36.83, 34.71, 28.57.

**<sup>19</sup>F NMR (564 MHz, CDCl<sub>3</sub>)** δ -88.48 (d, *J* = 39.9 Hz, 1F), -91.80 (d, *J* = 39.8 Hz, 1F).

#### 4,4-difluoro-3-(naphthalen-2-yl)-1-phenylbut-3-en-1-one (**19**)

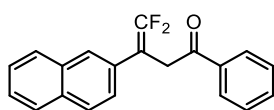

The substrate was prepared following the general procedure A using **S13** (22.2 mg, 0.1 mmol, 1.0 equiv.), 2-benzoyl-2-methyl-2,3-dihydroquinazolin-4(1*H*)-one (53.2 mg, 0.2 mmol, 2.0 equiv.), 4CzIPN (3.2 mg, 4 mol%), Na<sub>2</sub>CO<sub>3</sub> (15.9 mg, 0.15 mmol, 1.5 equiv.), anhydrous DMF (1 mL). The product **19** was isolated using flash column chromatography on silica gel (petroleum ether/ethyl acetate = 20:1) as a white solid (19.4 mg, 63%).

**<sup>1</sup>H NMR (600 MHz, CDCl<sub>3</sub>)** δ 7.99 (d, *J* = 7.5 Hz, 2H), 7.83 – 7.75 (m, 4H), 7.59 (t, *J* = 7.4 Hz, 1H), 7.51 – 7.43 (m, 5H), 4.17 (t, *J* = 1.8 Hz, 2H).

**<sup>13</sup>C NMR (151 MHz, CDCl<sub>3</sub>)** δ 195.34 (dd, *J* = 3.3, 2.3 Hz), 154.92 (dd, *J* = 292.6, 288.6 Hz), 136.28, 133.46, 133.17, 132.47, 130.89 (t, *J* = 4.0 Hz), 128.73, 128.16, 128.15, 127.97, 127.55, 127.10 (t, *J* = 3.5 Hz), 126.26, 126.19, 125.80 (dd, *J* = 4.1, 2.6 Hz), 87.33 (dd, *J* = 22.0, 17.3 Hz), 38.49 (d, *J* = 2.5 Hz).

**<sup>19</sup>F NMR (564 MHz, CDCl<sub>3</sub>)** δ -87.62 (d, *J* = 35.6 Hz, 1F), -88.80 (d, *J* = 35.9 Hz, 1F).

**HRMS (ESI) (m/z):** [M+Na]<sup>+</sup> Calcd for C<sub>20</sub>H<sub>14</sub>F<sub>2</sub>NaO<sup>+</sup>, 331.0905; found: 331.0901.

#### 4-(1,1-difluoro-4-phenoxybut-1-en-2-yl)-1,1'-biphenyl (**20**)

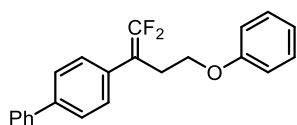

The substrate was prepared following the general procedure A using **S1** (24.8 mg, 0.1 mmol, 1.0 equiv.), 2-methyl-2-(phenoxyethyl)-2,3-dihydroquinazolin-4(1*H*)-one (53.6 mg, 0.2 mmol, 2.0 equiv.), 4CzIPN (3.2 mg, 4 mol%), Na<sub>2</sub>CO<sub>3</sub> (15.9 mg, 0.15 mmol, 1.5 equiv.), anhydrous DMF (1 mL). The product **20** was isolated using flash column chromatography on silica gel (petroleum ether) as a colorless oil (26.9 mg, 80%).

**<sup>1</sup>H NMR (600 MHz, CDCl<sub>3</sub>)** δ 7.64 – 7.57 (m, 4H), 7.50 – 7.33 (m, 5H), 7.30 – 7.22 (m, 2H), 6.97 – 6.90 (m, 1H), 6.86 (d, *J* = 8.5 Hz, 2H), 4.02 (t, *J* = 6.9 Hz, 2H), 2.93 (dd, *J* = 9.4, 4.2 Hz, 2H).

**<sup>13</sup>C NMR (151 MHz, CDCl<sub>3</sub>)** δ 158.58, 154.31 (dd, *J* = 291.4, 288.7 Hz), 140.47, 140.29, 132.13 – 132.03 (m), 129.43, 128.82, 128.63 (t, *J* = 3.3 Hz), 127.46, 127.22, 127.02, 120.85, 114.53, 88.98 (dd, *J* = 21.6, 15.0 Hz), 65.37 (t, *J* = 3.02 Hz), 28.10 (d, *J* = 1.4 Hz).

**<sup>19</sup>F NMR (564 MHz, CDCl<sub>3</sub>)** δ -89.09 (d, *J* = 39.0 Hz, 1F), -89.42 (d, *J* = 39.0 Hz, 1F).

**HRMS (ESI) (m/z):** [M+Na]<sup>+</sup> Calcd for C<sub>22</sub>H<sub>18</sub>F<sub>2</sub>NaO<sup>+</sup>, 359.1218; found: 359.1223.

#### 2-(1,1-difluoro-4,4-dimethoxybut-1-en-2-yl)naphthalene (21)

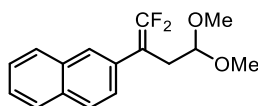

The substrate was prepared following the general procedure A using **S13** (33.3 mg, 0.15 mmol, 1.5 equiv.), 2-(dimethoxymethyl)-2-methyl-2,3-dihydroquinazolin-4(1*H*)-one (23.6 mg, 0.1 mmol, 1.0 equiv.), 4CzIPN (3.2 mg, 4 mol%), Na<sub>2</sub>CO<sub>3</sub> (15.9 mg, 0.15 mmol, 1.5 equiv.), anhydrous DMF (1 mL). The product **21** was isolated using flash column chromatography on silica gel (petroleum ether/ethyl acetate = 20:1) as a colorless oil (26.1 mg, 94%).

**<sup>1</sup>H NMR (600 MHz, CDCl<sub>3</sub>)** δ 7.87 – 7.78 (m, 4H), 7.52 – 7.45 (m, 3H), 4.37 (t, *J* = 5.8 Hz, 1H), 3.29 (d, *J* = 1.1 Hz, 6H), 2.80 (dd, *J* = 3.9, 1.5 Hz, 2H).

**<sup>13</sup>C NMR (151 MHz, CDCl<sub>3</sub>)** δ 154.53 (dd, *J* = 290.4, 288.6 Hz), 133.22, 132.50, 130.81 (dd, *J* = 4.1, 3.1 Hz), 128.11, 127.95, 127.59, 127.47 (t, *J* = 3.2 Hz), 126.29, 126.21 – 126.14 (m), 102.38 (dd, *J* = 3.7, 2.8 Hz), 88.75 (dd, *J* = 21.5, 16.3 Hz), 53.09, 31.88 (d, *J* = 1.5 Hz). (one carbon signal was overlapped).

**<sup>19</sup>F NMR (564 MHz, CDCl<sub>3</sub>)** δ -89.82 (d, *J* = 39.4 Hz, 1F), -90.02 (d, *J* = 39.2 Hz, 1F).

**HRMS (ESI) (m/z):** [M+Na]<sup>+</sup> Calcd for C<sub>16</sub>H<sub>16</sub>F<sub>2</sub>NaO<sub>2</sub><sup>+</sup>, 301.1011; found: 301.1016.

#### 4-(1,1-difluoro-5-(4-isopropylphenyl)-4-methylpent-1-en-2-yl)-1,1'-biphenyl (22)

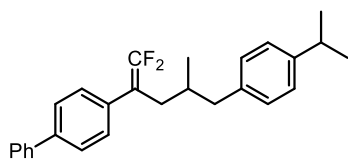

The substrate was prepared following the general procedure B using **S1** (37.3 mg, 0.15 mmol, 1.5 equiv.), diethyl 4-(1-(4-isopropylphenyl)propan-2-yl)-2,6-dimethyl-1,4-dihydropyridine-3,5-dicarboxylate (41.3 mg, 0.1 mmol, 1.0 equiv.), Eosin Y (1.3 mg, 2 mol%), Na<sub>2</sub>CO<sub>3</sub> (15.9 mg, 0.15 mmol, 1.5 equiv.), anhydrous DMF (1 mL). The product **22** was isolated using flash column chromatography on silica gel (petroleum ether) as a colorless oil (29.3 mg, 75%).

**<sup>1</sup>H NMR (600 MHz, CDCl<sub>3</sub>)** δ 7.65 – 7.55 (m, 4H), 7.49 – 7.29 (m, 5H), 7.13 (d, *J* = 8.0 Hz, 2H), 7.01 (d, *J* = 8.0 Hz, 2H), 2.93 – 2.83 (m, 1H), 2.65 (dd, *J* = 13.5, 6.2 Hz, 1H), 2.55 – 2.46 (m, 1H),

2.41 (dd,  $J = 13.5, 8.2$  Hz, 1H), 2.36 – 2.24 (m, 1H), 1.83 – 1.74 (m, 1H), 1.26 (d,  $J = 6.9$  Hz, 6H), 0.89 (d,  $J = 6.6$  Hz, 3H).

$^{13}\text{C}$  NMR (151 MHz,  $\text{CDCl}_3$ )  $\delta$  154.07 (dd,  $J = 290.8, 286.5$  Hz), 146.37, 140.58, 139.93, 138.09, 132.61 – 132.53 (m), 128.99, 128.80, 128.60 (t,  $J = 3.2$  Hz), 127.37, 127.04, 127.01, 126.18, 91.15 (dd,  $J = 21.9, 12.6$  Hz), 42.74, 34.37, 33.69, 33.27 (t,  $J = 2.2$  Hz), 24.09, 19.16.

$^{19}\text{F}$  NMR (564 MHz,  $\text{CDCl}_3$ )  $\delta$  -90.64 (d,  $J = 42.9$  Hz, 1F), -90.94 (d,  $J = 43.0$  Hz, 1F).

HRMS (ESI) ( $m/z$ ):  $[\text{M}+\text{Na}]^+$  Calcd for  $\text{C}_{27}\text{H}_{28}\text{F}_2\text{Na}^+$ , 413.2051; found: 413.2054.

#### 4-(1,1-difluoro-4-phenylpent-1-en-2-yl)-1,1'-biphenyl (23)

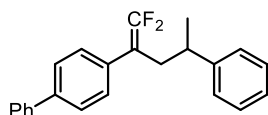

The substrate was prepared following the general procedure B using **S1** (37.3 mg, 0.15 mmol, 1.5 equiv.), diethyl 2,6-dimethyl-4-(1-phenylethyl)-1,4-dihydropyridine-3,5-dicarboxylate (35.7 mg, 0.1 mmol, 1.0 equiv.), Eosin Y (1.3 mg, 2 mol%),  $\text{Na}_2\text{CO}_3$  (15.9 mg, 0.15 mmol, 1.5 equiv.), anhydrous DMF (1 mL). The product **23** was isolated using flash column chromatography on silica gel (petroleum ether) as a colorless oil (22.4 mg, 67%).

$^1\text{H}$  NMR (600 MHz,  $\text{CDCl}_3$ )  $\delta$  7.65 – 7.57 (m, 4H), 7.50 – 7.32 (m, 5H), 7.29 (t,  $J = 7.6$  Hz, 2H), 7.20 (t,  $J = 7.3$  Hz, 1H), 7.15 (d,  $J = 7.2$  Hz, 2H), 2.79 – 2.63 (m, 3H), 1.27 (d,  $J = 6.6$  Hz, 3H).

$^{13}\text{C}$  NMR (151 MHz,  $\text{CDCl}_3$ )  $\delta$  154.13 (dd,  $J = 290.8, 287.0$  Hz), 146.16, 140.54, 140.02, 132.43 (dd,  $J = 4.5, 3.2$  Hz), 128.80, 128.71 (t,  $J = 3.1$  Hz), 128.34, 127.39, 127.10, 127.00, 126.94, 126.23, 90.98 (dd,  $J = 21.8, 13.2$  Hz), 37.74 (t,  $J = 2.3$  Hz), 36.22 (d,  $J = 1.0$  Hz), 21.10.

$^{19}\text{F}$  NMR (564 MHz,  $\text{CDCl}_3$ )  $\delta$  -90.59 (d,  $J = 41.8$  Hz, 1F), -91.28 (d,  $J = 41.8$  Hz, 1F).

HRMS (ESI) ( $m/z$ ):  $[\text{M}+\text{Na}]^+$  Calcd for  $\text{C}_{23}\text{H}_{20}\text{F}_2\text{Na}^+$ , 357.1425; found: 357.1421.

#### 4-(4-(4-bromophenyl)-1,1-difluorobut-1-en-2-yl)-1,1'-biphenyl (24)

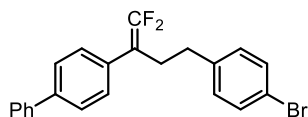

The substrate was prepared following the general procedure B using **S1** (37.3 mg, 0.15 mmol, 1.5 equiv.), diethyl 4-(4-bromobenzyl)-2,6-dimethyl-1,4-dihydropyridine-3,5-dicarboxylate (42.1 mg, 0.1 mmol, 1.0 equiv.), Eosin Y (1.3 mg, 2 mol%),  $\text{Na}_2\text{CO}_3$  (15.9 mg, 0.15 mmol, 1.5 equiv.), anhydrous DMF (1 mL). The product **24** was isolated using flash column chromatography on silica gel (petroleum ether) as a colorless oil (27.9 mg, 70%).

$^1\text{H}$  NMR (600 MHz,  $\text{CDCl}_3$ )  $\delta$  7.67 – 7.59 (m, 4H), 7.50 – 7.35 (m, 7H), 7.03 (d,  $J = 8.3$  Hz, 2H), 2.76 – 2.65 (m, 4H).

**<sup>13</sup>C NMR (151 MHz, CDCl<sub>3</sub>)** δ 153.83 (dd, *J* = 291.5, 287.4 Hz), 140.46, 140.20, 139.84, 132.15 – 132.07 (m), 131.43, 130.21, 128.84, 128.59 (t, *J* = 3.3 Hz), 127.47, 127.23, 127.02, 119.90, 91.24 (dd, *J* = 21.8, 13.2 Hz), 33.39 (t, *J* = 3.02 Hz), 29.28 (d, *J* = 1.5 Hz).

**<sup>19</sup>F NMR (564 MHz, CDCl<sub>3</sub>)** δ -90.30 (d, *J* = 41.2 Hz, 1F), -90.71 (d, *J* = 41.2 Hz, 1F).

**HRMS (ESI) (m/z):** [M+Na]<sup>+</sup> Calcd for C<sub>22</sub>H<sub>17</sub>BrF<sub>2</sub>Na<sup>+</sup>, 421.0374; found: 421.0379.

#### 4-(2-([1,1'-biphenyl]-4-yl)-3,3-difluoroallyl)-2,2-dimethyl-1,3-dioxolane (**25**)

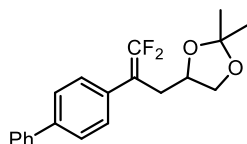

The substrate was prepared following the general procedure B using **S1** (37.3 mg, 0.15 mmol, 1.5 equiv.), diethyl 4-(4,4-dimethyl-1,3-dioxolan-2-yl)-2,6-dimethyl-1,4-dihydropyridine-3,5-dicarboxylate (35.3 mg, 0.1 mmol, 1.0 equiv.), Eosin Y (1.3 mg, 2 mol%), Na<sub>2</sub>CO<sub>3</sub> (15.9 mg, 0.15 mmol, 1.5 equiv.), anhydrous DMF (1 mL). The product **25** was isolated using flash column chromatography on silica gel (petroleum ether/ethyl acetate = 20:1) as a colorless oil (27.4 mg, 83%).

**<sup>1</sup>H NMR (600 MHz, CDCl<sub>3</sub>)** δ 7.60 (d, *J* = 8.2 Hz, 4H), 7.47 – 7.34 (m, 5H), 4.18 – 4.06 (m, 1H), 3.96 (dd, *J* = 8.1, 6.0 Hz, 1H), 3.59 (dd, *J* = 8.0, 6.6 Hz, 1H), 2.87 – 2.78 (m, 1H), 2.67 – 2.56 (m, 1H), 1.42 (s, 3H), 1.31 (s, 3H).

**<sup>13</sup>C NMR (151 MHz, CDCl<sub>3</sub>)** δ 154.34 (t, *J* = 12.08 Hz), 140.40, 140.36, 131.99 (d, *J* = 1.1 Hz), 128.81, 128.63 (t, *J* = 3.2 Hz), 127.47, 127.22, 127.00, 109.19, 88.85 (dd, *J* = 19.2, 17.5 Hz), 74.00 (t, *J* = 3.1 Hz), 68.88, 32.43, 26.89, 25.61.

**<sup>19</sup>F NMR (564 MHz, CDCl<sub>3</sub>)** δ -89.31 (s, 2F).

**HRMS (ESI) (m/z):** [M+Na]<sup>+</sup> Calcd for C<sub>20</sub>H<sub>20</sub>F<sub>2</sub>NaO<sub>2</sub><sup>+</sup>, 353.1324; found: 353.1321.

#### 2-(2-([1,1'-biphenyl]-4-yl)-3,3-difluoroallyl)tetrahydrofuran (**26**)<sup>8</sup>

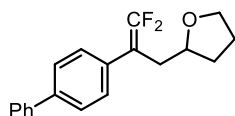

The substrate was prepared following the general procedure B using **S1** (37.3 mg, 0.15 mmol, 1.5 equiv.), diethyl 2,6-dimethyl-4-(tetrahydrofuran-2-yl)-1,4-dihydropyridine-3,5-dicarboxylate (32.3 mg, 0.1 mmol, 1.0 equiv.), Eosin Y (1.3 mg, 2 mol%), Na<sub>2</sub>CO<sub>3</sub> (15.9 mg, 0.15 mmol, 1.5 equiv.), anhydrous DMF (1 mL). The product **26** was isolated using flash column chromatography on silica gel (petroleum ether/ethyl acetate = 20:1) as a white solid (24.3 mg, 81%).

**<sup>1</sup>H NMR (600 MHz, CDCl<sub>3</sub>)** δ 7.64 – 7.56 (m, 4H), 7.50 – 7.41 (m, 4H), 7.37 – 7.33 (m, 1H), 3.93 – 3.81 (m, 2H), 3.78 – 3.64 (m, 1H), 2.83 – 2.69 (m, 1H), 2.64 – 2.48 (m, 1H), 2.00 – 1.74 (m, 3H), 1.57 – 1.45 (m, 1H).

**<sup>13</sup>C NMR (151 MHz, CDCl<sub>3</sub>)** δ 154.34 (t, *J* = 12.08 Hz), 140.52, 140.09, 132.47 (d, *J* = 1.6 Hz), 128.78, 128.67 (t, *J* = 3.3 Hz), 127.38, 127.11, 126.99, 89.79 (dd, *J* = 19.2, 16.8 Hz), 77.05, 67.81, 33.76, 30.95, 25.58.

**<sup>19</sup>F NMR (564 MHz, CDCl<sub>3</sub>)** δ -90.15 (s, 2F).

***tert*-butyl 4-(3,3-difluoro-2-(4-methoxyphenyl)allyl)piperidine-1-carboxylate (27)<sup>10</sup>**

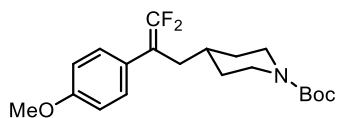

The substrate was prepared following the general procedure A using **S2** (30.3 mg, 0.15 mmol, 1.5 equiv.), *tert*-butyl 4-(2-methyl-4-oxo-1,2,3,4-tetrahydroquinazolin-2-yl)piperidine-1-carboxylate (34.5 mg, 0.1 mmol, 1.0 equiv.), 4CzIPN (3.2 mg, 4 mol%), Na<sub>2</sub>CO<sub>3</sub> (15.9 mg, 0.15 mmol, 1.5 equiv.), anhydrous DMF (1 mL). The product **27** was isolated using flash column chromatography on silica gel (petroleum ether/ethyl acetate = 20:1) as a colorless oil (31.6 mg, 86%).

**<sup>1</sup>H NMR (600 MHz, CDCl<sub>3</sub>)** δ 7.22 (d, *J* = 8.3 Hz, 2H), 6.89 (d, *J* = 8.7 Hz, 2H), 4.03 (d, *J* = 12.4 Hz, 2H), 3.81 (s, 3H), 2.56 (t, *J* = 12.2 Hz, 2H), 2.29 (d, *J* = 7.2 Hz, 2H), 1.60 (d, *J* = 12.9 Hz, 2H), 1.43 (s, 9H), 1.42 – 1.36 (m, 1H), 1.16 – 1.06 (m, 2H).

**<sup>13</sup>C NMR (151 MHz, CDCl<sub>3</sub>)** δ 158.67, 154.75, 154.06 (dd, *J* = 289.9, 286.9 Hz), 129.28 (t, *J* = 3.2 Hz), 125.68 (dd, *J* = 4.1, 3.1 Hz), 113.93, 89.89 (dd, *J* = 21.9, 13.6 Hz), 79.25, 55.23, 43.35, 34.45, 34.17 (t, *J* = 2.4 Hz), 31.68, 28.43.

**<sup>19</sup>F NMR (564 MHz, CDCl<sub>3</sub>)** δ -91.76 (d, *J* = 45.3 Hz, 1F), -92.10 (d, *J* = 45.2 Hz, 1F).

***tert*-butyl 4-(3,3-difluoro-2-(3-methoxyphenyl)allyl)piperidine-1-carboxylate (28)<sup>10</sup>**

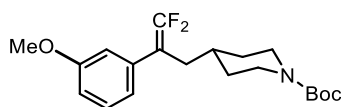

The substrate was prepared following the general procedure A using **S3** (30.3 mg, 0.15 mmol, 1.5 equiv.), *tert*-butyl 4-(2-methyl-4-oxo-1,2,3,4-tetrahydroquinazolin-2-yl)piperidine-1-carboxylate (34.5 mg, 0.1 mmol, 1.0 equiv.), 4CzIPN (3.2 mg, 4 mol%), Na<sub>2</sub>CO<sub>3</sub> (15.9 mg, 0.15 mmol, 1.5 equiv.), anhydrous DMF (1 mL). The product **28** was isolated using flash column chromatography on silica gel (petroleum ether/ethyl acetate = 20:1) as a colorless oil (29.4 mg, 80%).

**<sup>1</sup>H NMR (600 MHz, CDCl<sub>3</sub>)** δ 7.30 – 7.25 (m, 1H), 6.91 – 6.80 (m, 3H), 4.03 (d, *J* = 11.9 Hz, 2H), 3.81 (s, 3H), 2.57 (t, *J* = 12.1 Hz, 2H), 2.31 (dt, *J* = 7.1, 2.0 Hz, 2H), 1.61 (d, *J* = 14.1 Hz, 2H), 1.44 (s, 9H), 1.42 – 1.38 (m, 1H), 1.16 – 1.05 (m, 2H).

**<sup>13</sup>C NMR (151 MHz, CDCl<sub>3</sub>)** δ 159.56, 154.75, 154.18 (dd, *J* = 291.4, 286.9 Hz), 135.02 (dd, *J* = 3.4, 2.2 Hz), 129.46, 120.62 (t, *J* = 3.1 Hz), 114.41 (t, *J* = 3.3 Hz), 112.32, 90.43 (dd, *J* = 20.9, 14.2 Hz), 79.25, 55.22, 43.70, 34.40, 34.23 (t, *J* = 2.5 Hz), 31.69, 28.43.

**<sup>19</sup>F NMR (564 MHz, CDCl<sub>3</sub>)** δ -90.44 (d, *J* = 42.0 Hz, 1F), -90.55 (d, *J* = 42.1 Hz, 1F).



***tert*-butyl 4-(3,3-difluoro-2-(2-methoxyphenyl)allyl)piperidine-1-carboxylate (29)<sup>10</sup>**

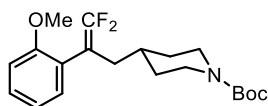

The substrate was prepared following the general procedure A using **S4** (30.3 mg, 0.15 mmol, 1.5 equiv.), *tert*-butyl 4-(2-methyl-4-oxo-1,2,3,4-tetrahydroquinazolin-2-yl)piperidine-1-carboxylate (34.5 mg, 0.1 mmol, 1.0 equiv.), 4CzIPN (3.2 mg, 4 mol%), Na<sub>2</sub>CO<sub>3</sub> (15.9 mg, 0.15 mmol, 1.5 equiv.), anhydrous DMF (1 mL). The product **29** was isolated using flash column chromatography on silica gel (petroleum ether/ethyl acetate = 20:1) as a colorless oil (27.5 mg, 75%).

**<sup>1</sup>H NMR (600 MHz, CDCl<sub>3</sub>)** δ 7.32 – 7.26 (m, 1H), 7.12 (d, *J* = 7.4 Hz, 1H), 6.97 – 6.86 (m, 2H), 4.02 (s, 2H), 3.81 (s, 3H), 2.58 (t, *J* = 12.1 Hz, 2H), 2.27 (d, *J* = 7.1 Hz, 2H), 1.64 (d, *J* = 11.6 Hz, 2H), 1.44 (s, 9H), 1.37 – 1.27 (m, 1H), 1.15 – 1.05 (m, 2H).

**<sup>13</sup>C NMR (151 MHz, CDCl<sub>3</sub>)** δ 157.26 (d, *J* = 2.0 Hz), 154.81, 153.46 (t, *J* = 287.20 Hz), 130.84 – 130.78 (m), 129.11, 122.66 (dd, *J* = 5.1, 1.6 Hz), 120.46, 111.03, 87.22 (dd, *J* = 23.9, 16.6 Hz), 79.18, 55.4, 43.52, 34.81, 34.23 (t, *J* = 2.5 Hz), 31.75, 28.44.

**<sup>19</sup>F NMR (564 MHz, CDCl<sub>3</sub>)** δ -89.43 (d, *J* = 43.0 Hz, 1F), -93.40 (d, *J* = 43.0 Hz, 1F).

***tert*-butyl 4-(2-(4-(*tert*-butyl)phenyl)-3,3-difluoroallyl)piperidine-1-carboxylate (30)<sup>10</sup>**

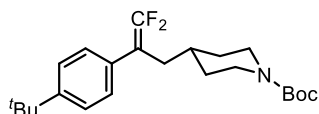

The substrate was prepared following the general procedure A using **S5** (34.2 mg, 0.15 mmol, 1.5 equiv.), *tert*-butyl 4-(2-methyl-4-oxo-1,2,3,4-tetrahydroquinazolin-2-yl)piperidine-1-carboxylate (34.5 mg, 0.1 mmol, 1.0 equiv.), 4CzIPN (3.2 mg, 4 mol%), Na<sub>2</sub>CO<sub>3</sub> (15.9 mg, 0.15 mmol, 1.5 equiv.), anhydrous DMF (1 mL). The product **30** was isolated using flash column chromatography on silica gel (petroleum ether/ethyl acetate = 20:1) as a colorless oil (32.6 mg, 83%).

**<sup>1</sup>H NMR (600 MHz, CDCl<sub>3</sub>)** δ 7.37 (d, *J* = 8.4 Hz, 2H), 7.23 (d, *J* = 7.5 Hz, 2H), 4.04 (s, 2H), 2.58 (t, *J* = 12.3 Hz, 2H), 2.34 – 2.29 (m, 2H), 1.62 (d, *J* = 12.4 Hz, 2H), 1.44 (s, 9H), 1.43 – 1.40 (m, 1H), 1.32 (s, 9H), 1.17 – 1.06 (m, 2H).

**<sup>13</sup>C NMR (151 MHz, CDCl<sub>3</sub>)** δ 154.77, 154.19 (dd, *J* = 291.4, 286.9 Hz), 150.19, 130.52 – 130.40 (m), 127.70 (t, *J* = 3.3 Hz), 125.39, 90.15 (dd, *J* = 21.7, 12.9 Hz), 79.24, 43.73, 34.51, 34.29, 34.18 (t, *J* = 2.4 Hz), 31.71, 31.26, 28.44.

**<sup>19</sup>F NMR (564 MHz, CDCl<sub>3</sub>)** δ -90.55 (d, *J* = 41.8 Hz, 1F), -91.00 (d, *J* = 41.8 Hz, 1F).

***tert*-butyl 4-(3,3-difluoro-2-(4-phenoxyphenyl)allyl)piperidine-1-carboxylate (31)**

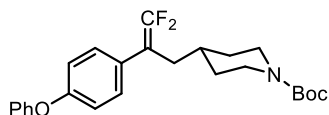

The substrate was prepared following the general procedure A using **S6** (39.6 mg, 0.15 mmol, 1.5 equiv.), *tert*-butyl 4-(2-methyl-4-oxo-1,2,3,4-tetrahydroquinazolin-2-yl)piperidine-1-carboxylate (34.5 mg, 0.1 mmol, 1.0 equiv.), 4CzIPN (3.2 mg, 4 mol%), Na<sub>2</sub>CO<sub>3</sub> (15.9 mg, 0.15 mmol, 1.5 equiv.), anhydrous DMF (1 mL). The product **31** was isolated using flash column chromatography on silica gel (petroleum ether/ethyl acetate = 20:1) as a colorless oil (33.5 mg, 78%).

**<sup>1</sup>H NMR (600 MHz, CDCl<sub>3</sub>)** δ 7.35 (t, *J* = 7.8 Hz, 2H), 7.25 (d, *J* = 8.7 Hz, 2H), 7.12 (t, *J* = 7.8 Hz, 1H), 7.04 (d, *J* = 8.3 Hz, 2H), 6.98 (d, *J* = 8.6 Hz, 2H), 4.05 (s, 2H), 2.59 (s, 2H), 2.31 (d, *J* = 7.1 Hz, 2H), 1.62 (d, *J* = 12.5 Hz, 2H), 1.47 – 1.39 (m, 10H), 1.12 (dd, *J* = 21.0, 10.9 Hz, 2H).

**<sup>13</sup>C NMR (151 MHz, CDCl<sub>3</sub>)** δ 156.66, 156.60, 154.76, 154.16 (dd, *J* = 291.4, 286.9 Hz), 129.80, 129.50 (t, *J* = 3.2 Hz), 128.18 (dd, *J* = 4.2, 3.3 Hz), 123.61, 119.25, 118.46, 89.89 (dd, *J* = 22.2, 13.2 Hz), 79.29, 43.68, 34.42, 34.23 (t, *J* = 2.3 Hz), 31.69, 28.44.

**<sup>19</sup>F NMR (564 MHz, CDCl<sub>3</sub>)** δ -90.97 (d, *J* = 43.4 Hz, 1F), -91.30 (d, *J* = 38.2 Hz, 1F).

**HRMS (ESI) (m/z):** [M+Na]<sup>+</sup> Calcd for C<sub>25</sub>H<sub>29</sub>F<sub>2</sub>NNaO<sub>3</sub><sup>+</sup>, 452.2008; found: 452.2012.

#### ***tert*-butyl 4-(2-(4-chlorophenyl)-3,3-difluoroallyl)piperidine-1-carboxylate (32)**

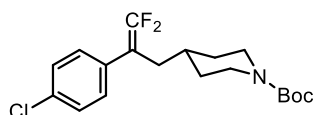

The substrate was prepared following the general procedure A using **S7** (30.9 mg, 0.15 mmol, 1.5 equiv.), *tert*-butyl 4-(2-methyl-4-oxo-1,2,3,4-tetrahydroquinazolin-2-yl)piperidine-1-carboxylate (34.5 mg, 0.1 mmol, 1.0 equiv.), 4CzIPN (3.2 mg, 4 mol%), Na<sub>2</sub>CO<sub>3</sub> (15.9 mg, 0.15 mmol, 1.5 equiv.), anhydrous DMF (1 mL). The product **32** was isolated using flash column chromatography on silica gel (petroleum ether/ethyl acetate = 20:1) as a colorless oil (29.7 mg, 80%).

**<sup>1</sup>H NMR (600 MHz, CDCl<sub>3</sub>)** δ 7.33 (d, *J* = 8.5 Hz, 2H), 7.23 (d, *J* = 8.2 Hz, 2H), 4.03 (s, 2H), 2.56 (t, *J* = 12.3 Hz, 2H), 2.33 – 2.28 (m, 2H), 1.58 (d, *J* = 12.7 Hz, 2H), 1.43 (s, 9H), 1.41 – 1.34 (m, 1H), 1.15 – 1.06 (m, 2H).

**<sup>13</sup>C NMR (151 MHz, CDCl<sub>3</sub>)** δ 154.72, 154.16 (dd, *J* = 291.4, 286.9 Hz), 133.16, 132.05 (dd, *J* = 4.4, 3.6 Hz), 129.47 (t, *J* = 3.3 Hz), 128.76, 89.74 (dd, *J* = 22.7, 13.0 Hz), 79.31, 43.55, 34.23 (t, *J* = 2.1 Hz), 31.65, 28.43. (one carbon signal was overlapped).

**<sup>19</sup>F NMR (564 MHz, CDCl<sub>3</sub>)** δ -89.86 (d, *J* = 41.0 Hz, 1F), -90.34 (d, *J* = 40.9 Hz, 1F).

**HRMS (ESI) (m/z):** [M+Na]<sup>+</sup> Calcd for C<sub>19</sub>H<sub>24</sub>ClF<sub>2</sub>NNaO<sub>2</sub><sup>+</sup>, 394.1356; found: 394.1353.

#### **1-bromo-4-(3-cyclohexyl-1,1-difluoroprop-1-en-2-yl)benzene (33)<sup>11</sup>**

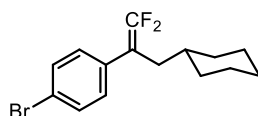

The substrate was prepared following the general procedure B using **S8** (37.5 mg, 0.15 mmol, 1.5 equiv.), diethyl 4-cyclohexyl-2,6-dimethyl-1,4-dihydropyridine-3,5-dicarboxylate (33.5 mg, 0.1

mmol, 1.0 equiv.), Eosin Y (1.3 mg, 2 mol%), Na<sub>2</sub>CO<sub>3</sub> (15.9 mg, 0.15 mmol, 1.5 equiv.), anhydrous DMF (1 mL). The product **33** was isolated using flash column chromatography on silica gel (petroleum ether) as a colorless oil (23.6 mg, 75%).

<sup>1</sup>H NMR (600 MHz, CDCl<sub>3</sub>) δ 7.47 (d, *J* = 8.5 Hz, 2H), 7.17 (d, *J* = 7.6 Hz, 2H), 2.24 (dt, *J* = 7.2, 2.4 Hz, 2H), 1.71 – 1.58 (m, 5H), 1.30 – 1.04 (m, 4H), 0.97 – 0.85 (m, 2H).

<sup>13</sup>C NMR (151 MHz, CDCl<sub>3</sub>) δ 153.88 (dd, *J* = 290.8, 286.7 Hz), 133.05 (dd, *J* = 4.7, 3.4 Hz), 131.54, 129.89 (t, *J* = 3.3 Hz), 120.99, 90.36 (dd, *J* = 22.9, 12.4 Hz), 35.66 (t, *J* = 1.9 Hz), 35.00, 32.80, 26.33, 26.00.

<sup>19</sup>F NMR (564 MHz, CDCl<sub>3</sub>) δ -95.17 (d, *J* = 42.2 Hz, 1F), -95.72 (d, *J* = 42.2 Hz, 1F).

#### ***tert*-butyl 4-(2-(3-chloro-4-fluorophenyl)-3,3-difluoroallyl)piperidine-1-carboxylate (34)**

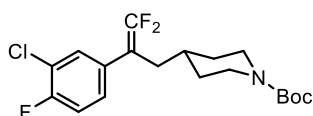

The substrate was prepared following the general procedure A using **S9** (33.6 mg, 0.15 mmol, 1.5 equiv.), *tert*-butyl 4-(2-methyl-4-oxo-1,2,3,4-tetrahydroquinazolin-2-yl)piperidine-1-carboxylate (34.5 mg, 0.1 mmol, 1.0 equiv.), 4CzIPN (3.2 mg, 4 mol%), Na<sub>2</sub>CO<sub>3</sub> (15.9 mg, 0.15 mmol, 1.5 equiv.), anhydrous DMF (1 mL). The product **34** was isolated using flash column chromatography on silica gel (petroleum ether/ethyl acetate = 20:1) as a colorless oil (29.6 mg, 76%).

<sup>1</sup>H NMR (600 MHz, CDCl<sub>3</sub>) δ 7.33 (dd, *J* = 6.9, 1.6 Hz, 1H), 7.19 – 7.10 (m, 2H), 4.04 (d, *J* = 10.7 Hz, 2H), 2.58 (t, *J* = 12.4 Hz, 2H), 2.35 – 2.21 (m, 2H), 1.59 (d, *J* = 12.9 Hz, 2H), 1.43 (s, 9H), 1.40 – 1.34 (m, 1H), 1.16 – 1.06 (m, 2H).

<sup>13</sup>C NMR (151 MHz, CDCl<sub>3</sub>) δ 157.17 (d, *J* = 250.1 Hz), 154.71, 154.26 (dd, *J* = 291.4, 289.9 Hz), 130.73 (dd, *J* = 8.0, 4.1 Hz), 130.30 (t, *J* = 3.4 Hz), 128.11 – 127.84 (m), 121.19 (d, *J* = 18.0 Hz), 116.70 (d, *J* = 21.2 Hz), 89.13 (dd, *J* = 23.4, 13.0 Hz), 79.35, 43.46, 34.33, 34.19 (t, *J* = 2.3 Hz), 31.63, 28.42.

<sup>19</sup>F NMR (564 MHz, CDCl<sub>3</sub>) δ -89.46 (d, *J* = 40.1 Hz, 1F), -89.94 (d, *J* = 40.1 Hz, 1F), -116.57 (s, 1F).

HRMS (ESI) (*m/z*): [M+H]<sup>+</sup> Calcd for C<sub>19</sub>H<sub>24</sub>ClF<sub>3</sub>NO<sub>2</sub><sup>+</sup>, 390.1442; found: 390.1440.

#### **3-(3-cyclohexyl-1,1-difluoroprop-1-en-2-yl)benzamide (35)**

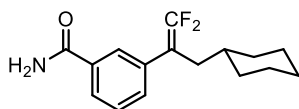

The substrate was prepared following the general procedure A using **S10** (34.8 mg, 0.15 mmol, 1.5 equiv.), 2-cyclohexyl-2-methyl-2,3-dihydroquinazolin-4(1*H*)-one (24.4 mg, 0.1 mmol, 1.0 equiv.), 4CzIPN (3.2 mg, 4 mol%), Na<sub>2</sub>CO<sub>3</sub> (15.9 mg, 0.15 mmol, 1.5 equiv.), anhydrous DMF (1 mL). The

product **35** was isolated using flash column chromatography on silica gel (petroleum ether/ethyl acetate = 1:1) as a white solid (17.0 mg, 61%).

**<sup>1</sup>H NMR (600 MHz, CDCl<sub>3</sub>)** δ 7.78 (s, 1H), 7.68 (d, *J* = 7.5 Hz, 1H), 7.44 (dt, *J* = 15.3, 7.5 Hz, 2H), 6.21 (s, 2H), 2.32 – 2.26 (m, 2H), 1.71 – 1.59 (m, 5H), 1.23 – 1.16 (m, 1H), 1.15 – 1.05 (m, 3H), 0.94 – 0.84 (m, 3H).

**<sup>13</sup>C NMR (151 MHz, CDCl<sub>3</sub>)** δ 169.41, 154.10 (dd, *J* = 290.8, 287.1 Hz), 134.88 (dd, *J* = 4.8, 3.2 Hz), 133.61, 131.89 (t, *J* = 3.1 Hz), 128.69, 127.39 (t, *J* = 3.2 Hz), 125.86, 90.64 (dd, *J* = 22.8, 12.1 Hz), 35.66, 35.07, 32.80, 26.31, 25.99.

**<sup>19</sup>F NMR (564 MHz, CDCl<sub>3</sub>)** δ -90.27 (d, *J* = 41.9 Hz, 1F), -91.01 (d, *J* = 41.9 Hz, 1F).

**HRMS (ESI) (m/z):** [M+Na]<sup>+</sup> Calcd for C<sub>16</sub>H<sub>19</sub>F<sub>2</sub>NNaO<sup>+</sup>, 302.1327; found: 302.1322.

#### ***tert*-butyl 4-(2-(4-cyanophenyl)-3,3-difluoroallyl)piperidine-1-carboxylate (**36**)**

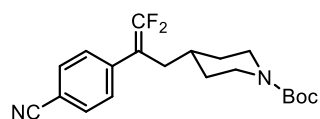

The substrate was prepared following the general procedure A using **S11** (29.6 mg, 0.15 mmol, 1.5 equiv.), *tert*-butyl 4-(2-methyl-4-oxo-1,2,3,4-tetrahydroquinazolin-2-yl)piperidine-1-carboxylate (34.5 mg, 0.1 mmol, 1.0 equiv.), 4CzIPN (3.2 mg, 4 mol%), Na<sub>2</sub>CO<sub>3</sub> (15.9 mg, 0.15 mmol, 1.5 equiv.), anhydrous DMF (1 mL). The product **36** was isolated using flash column chromatography on silica gel (petroleum ether/ethyl acetate = 10:1) as a colorless oil (25.7 mg, 71%).

**<sup>1</sup>H NMR (600 MHz, CDCl<sub>3</sub>)** δ 7.65 (d, *J* = 8.4 Hz, 2H), 7.42 (d, *J* = 8.3 Hz, 2H), 4.04 (d, *J* = 9.1 Hz, 2H), 2.56 (t, *J* = 12.5 Hz, 2H), 2.36 (d, *J* = 7.1 Hz, 2H), 1.58 (d, *J* = 13.2 Hz, 2H), 1.43 (s, 9H), 1.39 – 1.34 (m, 1H), 1.17 – 1.06 (m, 2H).

**<sup>13</sup>C NMR (151 MHz, CDCl<sub>3</sub>)** δ 154.68, 154.46 (dd, *J* = 294.5, 289.9 Hz), 138.71 – 138.61 (m), 132.33, 128.76 (t, *J* = 3.5 Hz), 118.50, 111.10, 89.99 (dd, *J* = 23.3, 12.1 Hz), 79.40, 43.59, 34.43 (t, *J* = 2.3 Hz), 33.87, 31.65, 28.41.

**<sup>19</sup>F NMR (564 MHz, CDCl<sub>3</sub>)** δ -86.92 (d, *J* = 34.8 Hz, 1F), -87.89 (d, *J* = 34.8 Hz, 1F).

**HRMS (ESI) (m/z):** [M+Na]<sup>+</sup> Calcd for C<sub>20</sub>H<sub>24</sub>F<sub>2</sub>N<sub>2</sub>NaO<sub>2</sub><sup>+</sup>, 385.1698; found: 385.1707.

#### ***tert*-butyl 4-(3,3-difluoro-2-(4-(methylthio)phenyl)allyl)piperidine-1-carboxylate (**37**)**

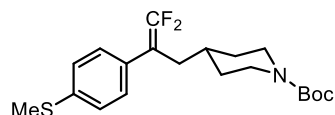

The substrate was prepared following the general procedure A using **S12** (32.7 mg, 0.15 mmol, 1.5 equiv.), *tert*-butyl 4-(2-methyl-4-oxo-1,2,3,4-tetrahydroquinazolin-2-yl)piperidine-1-carboxylate (34.5 mg, 0.1 mmol, 1.0 equiv.), 4CzIPN (3.2 mg, 4 mol%), Na<sub>2</sub>CO<sub>3</sub> (15.9 mg, 0.15 mmol, 1.5 equiv.), anhydrous DMF (1 mL). The product **37** was isolated using flash column chromatography on silica gel (petroleum ether/ethyl acetate = 20:1) as a colorless oil (26.1 mg, 68%).

**<sup>1</sup>H NMR (600 MHz, CDCl<sub>3</sub>)** δ 7.25 – 7.19 (m, 4H), 4.03 (s, 2H), 2.56 (t, *J* = 11.9 Hz, 2H), 2.49 (s, 3H), 2.31 (d, *J* = 7.2 Hz, 2H), 1.59 (d, *J* = 12.8 Hz, 2H), 1.43 (s, 9H), 1.42 – 1.36 (m, 1H), 1.15 – 1.04 (m, 2H).

**<sup>13</sup>C NMR (151 MHz, CDCl<sub>3</sub>)** δ 154.74, 154.15 (dd, *J* = 291.4, 286.9 Hz), 137.66, 130.22 – 130.13 (m), 128.52 (t, *J* = 3.3 Hz), 126.40, 90.01 (dd, *J* = 22.1, 13.0 Hz), 79.28, 43.67, 34.30 – 34.14 (m), 31.68, 28.43, 15.59. (one carbon signal was overlapped).

**<sup>19</sup>F NMR (564 MHz, CDCl<sub>3</sub>)** δ -90.51 (d, *J* = 42.6 Hz, 1F), -90.88 (d, *J* = 42.6 Hz, 1F).

**HRMS (ESI) (m/z):** [M+Na]<sup>+</sup> Calcd for C<sub>20</sub>H<sub>27</sub>F<sub>2</sub>NNaO<sub>2</sub>S<sup>+</sup>, 406.1623; found: 406.1620.

***tert*-butyl 4-(3,3-difluoro-2-(naphthalen-2-yl)allyl)piperidine-1-carboxylate (**38**)<sup>12</sup>**

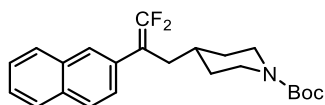

The substrate was prepared following the general procedure A using **S13** (33.3 mg, 0.15 mmol, 1.5 equiv.), *tert*-butyl 4-(2-methyl-4-oxo-1,2,3,4-tetrahydroquinazolin-2-yl)piperidine-1-carboxylate (34.5 mg, 0.1 mmol, 1.0 equiv.), 4CzIPN (3.2 mg, 4 mol%), Na<sub>2</sub>CO<sub>3</sub> (15.9 mg, 0.15 mmol, 1.5 equiv.), anhydrous DMF (1 mL). The product **38** was isolated using flash column chromatography on silica gel (petroleum ether/ethyl acetate = 20:1) as a white solid (34.8 mg, 90%).

**<sup>1</sup>H NMR (600 MHz, CDCl<sub>3</sub>)** δ 7.83 (t, *J* = 7.8 Hz, 3H), 7.76 (s, 1H), 7.54 – 7.47 (m, 2H), 7.43 (d, *J* = 8.5 Hz, 1H), 4.03 (s, 2H), 2.54 (t, *J* = 12.4 Hz, 2H), 2.45 (d, *J* = 7.2 Hz, 2H), 1.65 (d, *J* = 12.8 Hz, 2H), 1.49 – 1.37 (m, 10H), 1.21 – 1.03 (m, 2H).

**<sup>13</sup>C NMR (151 MHz, CDCl<sub>3</sub>)** δ 154.74, 154.35 (dd, *J* = 291.4, 288.41 Hz), 133.23, 132.46, 131.04 (dd, *J* = 4.4, 3.2 Hz), 128.16, 127.88, 127.61, 127.27 (t, *J* = 3.3 Hz), 126.35, 126.20, 126.01 (t, *J* = 3.0 Hz), 90.65 (dd, *J* = 22.0, 13.1 Hz), 79.27, 43.96, 34.46 (d, *J* = 0.9 Hz), 34.29 (t, *J* = 2.4 Hz), 31.72, 28.44.

**<sup>19</sup>F NMR (564 MHz, CDCl<sub>3</sub>)** δ -90.27 (d, *J* = 41.9 Hz, 1F), -90.88 (d, *J* = 41.9 Hz, 1F).

***tert*-butyl 4-(3,3-difluoro-2-(naphthalen-1-yl)allyl)piperidine-1-carboxylate (**39**)**

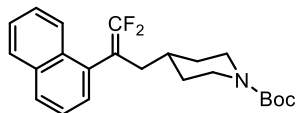

The substrate was prepared following the general procedure A using **S14** (33.3 mg, 0.15 mmol, 1.5 equiv.), *tert*-butyl 4-(2-methyl-4-oxo-1,2,3,4-tetrahydroquinazolin-2-yl)piperidine-1-carboxylate (34.5 mg, 0.1 mmol, 1.0 equiv.), 4CzIPN (3.2 mg, 4 mol%), Na<sub>2</sub>CO<sub>3</sub> (15.9 mg, 0.15 mmol, 1.5 equiv.), anhydrous DMF (1 mL). The product **39** was isolated using flash column chromatography on silica gel (petroleum ether/ethyl acetate = 20:1) as a colorless oil (28.6 mg, 74%).

**<sup>1</sup>H NMR (600 MHz, CDCl<sub>3</sub>)** δ 7.91 – 7.80 (m, 3H), 7.57 – 7.38 (m, 3H), 7.33 (d, *J* = 7.0 Hz, 1H), 4.04 (s, 2H), 2.57 (s, 2H), 2.40 (s, 2H), 1.82 – 1.57 (m, 2H), 1.44 (s, 9H), 1.41 – 1.35 (m, 1H), 1.16 (d, *J* = 10.6 Hz, 2H).

**<sup>13</sup>C NMR (151 MHz, CDCl<sub>3</sub>)** δ 154.77, 154.01 (dd, *J* = 288.4, 286.9 Hz), 133.86, 131.45 (d, *J* = 2.3 Hz), 131.40 – 131.33 (m), 128.66, 128.41, 127.35 – 127.29 (m), 126.39, 125.99, 125.28, 124.76, 88.50 (dd, *J* = 22.4, 17.1 Hz), 79.27, 43.77, 36.32, 34.27 (t, *J* = 2.6 Hz), 31.78, 28.44.

**<sup>19</sup>F NMR (564 MHz, CDCl<sub>3</sub>)** δ -87.70 (d, *J* = 41.7 Hz, 1F), -92.21 (d, *J* = 42.1 Hz, 1F).

**HRMS (ESI) (m/z):** [M+H]<sup>+</sup> Calcd for C<sub>23</sub>H<sub>28</sub>F<sub>2</sub>NO<sub>2</sub><sup>+</sup>, 388.2083; found: 388.2088.

***tert*-butyl 4-(3,3-difluoro-2-(4-(trifluoromethyl)phenyl)allyl)piperidine-1-carboxylate (40)**

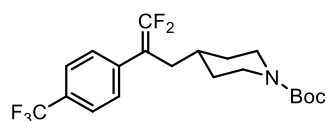

The substrate was prepared following the general procedure A using **S15** (36.0 mg, 0.15 mmol, 1.5 equiv.), *tert*-butyl 4-(2-methyl-4-oxo-1,2,3,4-tetrahydroquinazolin-2-yl)piperidine-1-carboxylate (34.5 mg, 0.1 mmol, 1.0 equiv.), 4CzIPN (3.2 mg, 4 mol%), Na<sub>2</sub>CO<sub>3</sub> (15.9 mg, 0.15 mmol, 1.5 equiv.), anhydrous DMF (1 mL). The product **40** was isolated using flash column chromatography on silica gel (petroleum ether/ethyl acetate = 20:1) as a colorless oil (36.8 mg, 91%).

**<sup>1</sup>H NMR (600 MHz, CDCl<sub>3</sub>)** δ 7.62 (d, *J* = 8.3 Hz, 2H), 7.42 (d, *J* = 8.0 Hz, 2H), 4.04 (d, *J* = 13.3 Hz, 2H), 2.61 – 2.54 (m, 2H), 2.39 – 2.34 (m, 2H), 1.60 (d, *J* = 12.4 Hz, 2H), 1.43 (s, 9H), 1.42 – 1.35 (m, 1H), 1.17 – 1.07 (m, 2H).

**<sup>13</sup>C NMR (151 MHz, CDCl<sub>3</sub>)** δ 154.71, 154.38 (dd, *J* = 292.9, 288.4 Hz), 137.52 – 137.42 (m), 129.34 (dd, *J* = 36.7, 28.7 Hz), 128.46 (t, *J* = 3.3 Hz), 125.49 (q, *J* = 3.8 Hz), 124.72 (q, *J* = 271.8 Hz), 89.95 (dd, *J* = 23.0, 12.6 Hz), 79.34, 43.63, 34.29 (t, *J* = 2.4 Hz), 34.14, 31.65, 28.41.

**<sup>19</sup>F NMR (564 MHz, CDCl<sub>3</sub>)** δ -62.70 (s, 3F), -88.53 (d, *J* = 38.1 Hz, 1F), -89.32 (d, *J* = 38.1 Hz, 1F).

**HRMS (ESI) (m/z):** [M+Na]<sup>+</sup> Calcd for C<sub>20</sub>H<sub>24</sub>F<sub>5</sub>NNaO<sub>2</sub><sup>+</sup>, 428.1619; found: 428.1613.

***tert*-butyl 4-(3,3-difluoro-2-(4-(trimethylsilyl)phenyl)allyl)piperidine-1-carboxylate (41)**

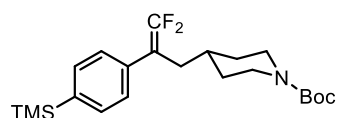

The substrate was prepared following the general procedure A using **S16** (36.6 mg, 0.15 mmol, 1.5 equiv.), *tert*-butyl 4-(2-methyl-4-oxo-1,2,3,4-tetrahydroquinazolin-2-yl)piperidine-1-carboxylate (34.5 mg, 0.1 mmol, 1.0 equiv.), 4CzIPN (3.2 mg, 4 mol%), Na<sub>2</sub>CO<sub>3</sub> (15.9 mg, 0.15 mmol, 1.5 equiv.), anhydrous DMF (1 mL). The product **41** was isolated using flash column chromatography on silica gel (petroleum ether/ethyl acetate = 20:1) as a colorless oil (26.6 mg, 65%).

**<sup>1</sup>H NMR (600 MHz, CDCl<sub>3</sub>)** δ 7.50 (d, *J* = 8.0 Hz, 2H), 7.28 (d, *J* = 7.2 Hz, 2H), 4.03 (s, 2H), 2.58 (t, *J* = 11.8 Hz, 2H), 2.34 (d, *J* = 7.2 Hz, 2H), 1.62 (d, *J* = 10.3 Hz, 2H), 1.48 – 1.37 (m, 10H), 1.18 – 1.08 (m, 2H), 0.27 (s, 9H).

**<sup>13</sup>C NMR (151 MHz, CDCl<sub>3</sub>)** δ 154.76, 154.23 (dd, *J* = 291.4, 286.9 Hz), 139.59, 133.99 – 133.90 (m), 133.47, 127.36 (t, *J* = 3.2 Hz), 90.45 (dd, *J* = 21.8, 12.8 Hz), 79.25, 43.69, 34.25 (d, *J* = 0.8 Hz), 34.20 (t, *J* = 2.4 Hz), 31.70, 28.43, -1.17.

**<sup>19</sup>F NMR (564 MHz, CDCl<sub>3</sub>)** δ -90.26 (d, *J* = 42.0 Hz, 1F), -90.72 (d, *J* = 41.8 Hz, 1F).

**HRMS (ESI) (m/z):** [M+Na]<sup>+</sup> Calcd for C<sub>22</sub>H<sub>33</sub>F<sub>2</sub>NNaO<sub>2</sub>Si<sup>+</sup>, 432.2141; found: 432.2144.

### 1-(4-(3-cyclohexyl-1,1-difluoroprop-1-en-2-yl)phenyl)ethan-1-one (**42**)<sup>13</sup>

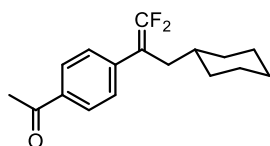

The substrate was prepared following the general procedure B using **S17** (32.1 mg, 0.15 mmol, 1.5 equiv.), diethyl 4-cyclohexyl-2,6-dimethyl-1,4-dihydropyridine-3,5-dicarboxylate (33.5 mg, 0.1 mmol, 1.0 equiv.), Eosin Y (1.3 mg, 2 mol%), Na<sub>2</sub>CO<sub>3</sub> (15.9 mg, 0.15 mmol, 1.5 equiv.), anhydrous DMF (1 mL). The product **42** was isolated using flash column chromatography on silica gel (petroleum ether/ethyl acetate = 10:1) as a colorless oil (22.8 mg, 82%).

**<sup>1</sup>H NMR (600 MHz, CDCl<sub>3</sub>)** δ 7.94 (d, *J* = 8.4 Hz, 2H), 7.41 (d, *J* = 8.3 Hz, 2H), 2.60 (s, 3H), 2.31 (dt, *J* = 7.2, 2.3 Hz, 2H), 1.67 – 1.59 (m, 5H), 1.26 – 1.18 (m, 1H), 1.15 – 1.04 (m, 3H), 0.91 (dd, *J* = 22.1, 12.2 Hz, 2H).

**<sup>13</sup>C NMR (151 MHz, CDCl<sub>3</sub>)** δ 197.54, 154.19 (dd, *J* = 292.6, 287.7 Hz), 139.22 (dd, *J* = 4.9, 3.7 Hz), 135.69, 128.42, 128.34 (t, *J* = 3.02 Hz), 90.84 (dd, *J* = 23.0, 11.7 Hz), 35.83, 34.80, 32.80, 26.56, 26.30, 25.99.

**<sup>19</sup>F NMR (564 MHz, CDCl<sub>3</sub>)** δ -88.77 (d, *J* = 38.6 Hz, 1F), -89.51 (d, *J* = 38.6 Hz, 1F).

### methyl 4-(3-cyclohexyl-1,1-difluoroprop-1-en-2-yl)benzoate (**43**)<sup>13</sup>

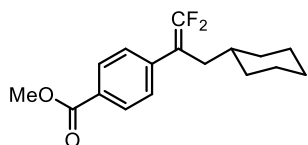

The substrate was prepared following the general procedure B using **S18** (34.5 mg, 0.15 mmol, 1.5 equiv.), diethyl 4-cyclohexyl-2,6-dimethyl-1,4-dihydropyridine-3,5-dicarboxylate (33.5 mg, 0.1 mmol, 1.0 equiv.), Eosin Y (1.3 mg, 2 mol%), Na<sub>2</sub>CO<sub>3</sub> (15.9 mg, 0.15 mmol, 1.5 equiv.), anhydrous DMF (1 mL). The product **43** was isolated using flash column chromatography on silica gel (petroleum ether/ethyl acetate = 20:1) as a colorless oil (17.9 mg, 61%).

**<sup>1</sup>H NMR (600 MHz, CDCl<sub>3</sub>)** δ 8.01 (d, *J* = 8.4 Hz, 2H), 7.38 (d, *J* = 7.3 Hz, 2H), 3.91 (s, 3H), 2.30 (dt, 2H), 1.69 – 1.60 (m, 5H), 1.25 – 1.18 (m, 1H), 1.14 – 1.04 (m, 3H), 0.91 (dd, *J* = 22.3, 12.2 Hz, 2H).

**<sup>13</sup>C NMR (151 MHz, CDCl<sub>3</sub>)** δ 166.75, 154.15 (dd, *J* = 292.3, 287.6 Hz), 139.02 (dd, *J* = 4.8, 3.6 Hz), 129.62, 128.74, 128.17 (t, *J* = 3.4 Hz), 90.85 (dd, *J* = 22.8, 11.8 Hz), 52.11, 35.81, 34.84, 32.80, 26.31, 25.99.

**<sup>19</sup>F NMR (564 MHz, CDCl<sub>3</sub>)** δ -89.05 (d, *J* = 39.1 Hz, 1F), -89.72 (d, *J* = 39.1 Hz, 1F).

***tert*-butyl 4-(3,3-difluoro-2-(4-vinylphenyl)allyl)piperidine-1-carboxylate (44)**

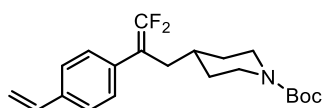

The substrate was prepared following the general procedure A using **S19** (29.7 mg, 0.15 mmol, 1.5 equiv.), *tert*-butyl 4-(2-methyl-4-oxo-1,2,3,4-tetrahydroquinazolin-2-yl)piperidine-1-carboxylate (34.5 mg, 0.1 mmol, 1.0 equiv.), 4CzIPN (3.2 mg, 4 mol%), Na<sub>2</sub>CO<sub>3</sub> (15.9 mg, 0.15 mmol, 1.5 equiv.), anhydrous DMF (1 mL). The product **44** was isolated using flash column chromatography on silica gel (petroleum ether/ethyl acetate = 20:1) as a colorless oil (19.6 mg, 54%).

**<sup>1</sup>H NMR (600 MHz, CDCl<sub>3</sub>)** δ 7.40 (dd, *J* = 7.9, 4.6 Hz, 2H), 7.29 – 7.24 (m, 2H), 6.76 – 6.60 (m, 1H), 5.76 (dd, *J* = 17.6, 4.4 Hz, 1H), 5.26 (dd, *J* = 10.9, 4.4 Hz, 1H), 4.02 (s, 2H), 2.56 (s, 2H), 2.33 (s, 2H), 1.60 (d, *J* = 12.2 Hz, 2H), 1.50 – 1.34 (m, 10H), 1.11 (d, *J* = 11.1 Hz, 2H).

**<sup>13</sup>C NMR (151 MHz, CDCl<sub>3</sub>)** δ 154.76, 154.20 (dd, *J* = 291.4, 286.9 Hz), 136.58, 136.17, 132.98 (dd, *J* = 4.3, 3.3 Hz), 128.26 (t, *J* = 3.3 Hz), 126.31, 114.21, 90.28 (dd, *J* = 22.0, 13.0 Hz), 79.31, 43.57, 34.26 (t, *J* = 2.4 Hz), 34.18 (d, *J* = 0.8 Hz), 31.68, 28.43.

**<sup>19</sup>F NMR (564 MHz, CDCl<sub>3</sub>)** δ -90.24 (d, *J* = 41.8 Hz, 1F), -90.57 (d, *J* = 41.8 Hz, 1F).

**HRMS (ESI) (m/z):** [M+Na]<sup>+</sup> Calcd for C<sub>21</sub>H<sub>27</sub>F<sub>2</sub>NNaO<sub>2</sub><sup>+</sup>, 386.1902; found: 386.1894.

***tert*-butyl 4-(2-(benzo[*d*][1,3]dioxol-5-yl)-3,3-difluoroallyl)piperidine-1-carboxylate (45)<sup>10</sup>**

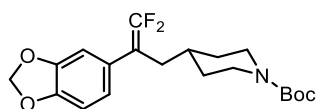

The substrate was prepared following the general procedure A using **S20** (32.4 mg, 0.15 mmol, 1.5 equiv.), *tert*-butyl 4-(2-methyl-4-oxo-1,2,3,4-tetrahydroquinazolin-2-yl)piperidine-1-carboxylate (34.5 mg, 0.1 mmol, 1.0 equiv.), 4CzIPN (3.2 mg, 4 mol%), Na<sub>2</sub>CO<sub>3</sub> (15.9 mg, 0.15 mmol, 1.5 equiv.), anhydrous DMF (1 mL). The product **45** was isolated using flash column chromatography on silica gel (petroleum ether/ethyl acetate = 20:1) as a colorless oil (27.1 mg, 71%).

**<sup>1</sup>H NMR (600 MHz, CDCl<sub>3</sub>)** δ 6.80 – 6.73 (m, 3H), 5.97 (s, 2H), 4.03 (s, 2H), 2.58 (t, *J* = 12.1 Hz, 2H), 2.26 (d, *J* = 7.2 Hz, 2H), 1.59 (d, *J* = 12.7 Hz, 2H), 1.44 (s, 9H), 1.42 – 1.37 (m, 1H), 1.15 – 1.05 (m, 2H).



$^{13}\text{C}$  NMR (151 MHz,  $\text{CDCl}_3$ )  $\delta$  154.75, 154.11 (dd,  $J = 289.9, 287.6$  Hz), 147.74, 146.75, 127.21 (d,  $J = 2.3$  Hz), 121.72 (t,  $J = 3.2$  Hz), 108.68 (t,  $J = 3.3$  Hz), 108.34, 101.15, 90.22 (dd,  $J = 20.1, 15.8$  Hz), 79.26, 43.81, 34.65, 34.15 (t,  $J = 2.4$  Hz), 31.66, 28.43.

$^{19}\text{F}$  NMR (564 MHz,  $\text{CDCl}_3$ )  $\delta$  -91.37 (d,  $J = 44.8$  Hz, 1F), -91.45 (d,  $J = 44.4$  Hz, 1F).

***tert*-butyl 4-(2-(dibenzo[*b,d*]thiophen-4-yl)-3,3-difluoroallyl)piperidine-1-carboxylate (46)**

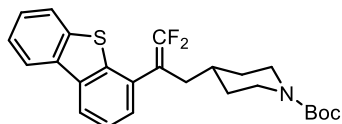

The substrate was prepared following the general procedure A using **S21** (41.7 mg, 0.15 mmol, 1.5 equiv.), *tert*-butyl 4-(2-methyl-4-oxo-1,2,3,4-tetrahydroquinazolin-2-yl)piperidine-1-carboxylate (34.5 mg, 0.1 mmol, 1.0 equiv.), 4CzIPN (3.2 mg, 4 mol%),  $\text{Na}_2\text{CO}_3$  (15.9 mg, 0.15 mmol, 1.5 equiv.), anhydrous DMF (1 mL). The product **46** was isolated using flash column chromatography on silica gel (petroleum ether/ethyl acetate = 20:1) as a colorless oil (38.9 mg, 88%).

$^1\text{H}$  NMR (600 MHz,  $\text{CDCl}_3$ )  $\delta$  8.18 – 8.10 (m, 2H), 7.86 (dd,  $J = 5.1, 3.7$  Hz, 1H), 7.50 – 7.43 (m, 3H), 7.31 (d,  $J = 7.3$  Hz, 1H), 4.04 (d,  $J = 12.7$  Hz, 2H), 2.56 (t,  $J = 12.0$  Hz, 2H), 2.46 (d,  $J = 7.0$  Hz, 2H), 1.71 (d,  $J = 12.7$  Hz, 2H), 1.44 (s, 9H), 1.39 – 1.32 (m, 1H), 1.22 – 1.12 (m, 2H).

$^{13}\text{C}$  NMR (151 MHz,  $\text{CDCl}_3$ )  $\delta$  154.76, 153.63 (t,  $J = 10.57$  Hz), 139.70 (dd,  $J = 2.4, 1.2$  Hz), 139.06, 136.08, 135.65, 128.83 (dd,  $J = 5.0, 1.4$  Hz), 127.37 (d,  $J = 1.8$  Hz), 127.02, 124.74, 124.52, 122.72, 121.74, 121.06, 89.70 (dd,  $J = 23.6, 15.8$  Hz), 79.25, 43.61, 34.96, 34.43 (t,  $J = 2.5$  Hz), 31.87, 28.44.

$^{19}\text{F}$  NMR (564 MHz,  $\text{CDCl}_3$ )  $\delta$  -85.94 (d,  $J = 37.4$  Hz, 1F), -90.81 (d,  $J = 37.5$  Hz, 1F).

HRMS (ESI) ( $m/z$ ):  $[\text{M}+\text{Na}]^+$  Calcd for  $\text{C}_{25}\text{H}_{27}\text{F}_2\text{NNaO}_2\text{S}^+$ , 466.1623; found: 466.1627.

**2-(3-cyclohexyl-1,1-difluoroprop-1-en-2-yl)benzo[*b*]thiophene (47)**

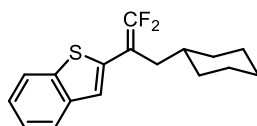

The substrate was prepared following the general procedure B using **S22** (34.2 mg, 0.15 mmol, 1.5 equiv.), diethyl 4-cyclohexyl-2,6-dimethyl-1,4-dihydropyridine-3,5-dicarboxylate (33.5 mg, 0.1 mmol, 1.0 equiv.), Eosin Y (1.3 mg, 2 mol%),  $\text{Na}_2\text{CO}_3$  (15.9 mg, 0.15 mmol, 1.5 equiv.), anhydrous DMF (1 mL). The product **47** was isolated using flash column chromatography on silica gel (petroleum ether) as a colorless oil (23.4 mg, 80%).

$^1\text{H}$  NMR (600 MHz,  $\text{CDCl}_3$ )  $\delta$  7.79 (d,  $J = 7.9$  Hz, 1H), 7.74 (d,  $J = 7.7$  Hz, 1H), 7.38 – 7.28 (m, 2H), 7.25 (s, 1H), 2.37 – 2.33 (m, 2H), 1.79 – 1.63 (m, 5H), 1.61 – 1.56 (m, 1H), 1.21 – 1.14 (m, 3H), 1.04 – 0.96 (m, 2H).

$^{13}\text{C}$  NMR (151 MHz,  $\text{CDCl}_3$ )  $\delta$  154.46 (dd,  $J = 297.0, 288.8$  Hz), 139.58, 139.23 (dd,  $J = 5.2, 1.5$  Hz), 136.72 (dd,  $J = 7.1, 4.3$  Hz), 124.37, 124.21, 123.23, 121.92 – 121.82 (m), 87.57 (dd,  $J = 26.9, 11.2$  Hz), 36.47 (t,  $J = 1.9$  Hz), 35.25, 32.96, 26.35, 26.11. (one carbon signal was overlapped).

$^{19}\text{F}$  NMR (564 MHz,  $\text{CDCl}_3$ )  $\delta$  -83.55 (d,  $J = 30.4$  Hz, 1F), -87.73 (d,  $J = 30.4$  Hz, 1F).

HRMS (ESI) (m/z):  $[\text{M}+\text{Na}]^+$  Calcd for  $\text{C}_{17}\text{H}_{18}\text{F}_2\text{NaS}^+$ , 315.0989; found: 315.0994.

***N*-(3-(3-cyclohexyl-1,1-difluoroprop-1-en-2-yl)phenyl)-2-(2-fluoro-[1,1'-biphenyl]-4-yl)propenamide (48)**

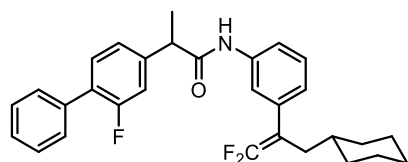

The substrate was prepared following the general procedure A using **S23** (41.3 mg, 0.1 mmol, 1.0 equiv.), 2-cyclohexyl-2-methyl-2,3-dihydroquinazolin-4(1*H*)-one (48.8 mg, 0.2 mmol, 2.0 equiv.), 4CzIPN (3.2 mg, 4 mol%),  $\text{Na}_2\text{CO}_3$  (15.9 mg, 0.15 mmol, 1.5 equiv.), anhydrous DMF (1 mL). The product **48** was isolated using flash column chromatography on silica gel (petroleum ether/ethyl acetate = 5:1) as a white solid (37.2 mg, 78%).

$^1\text{H}$  NMR (600 MHz,  $\text{CDCl}_3$ )  $\delta$  7.54 (d,  $J = 7.5$  Hz, 2H), 7.48 – 7.35 (m, 6H), 7.31 – 7.17 (m, 4H), 7.03 (d,  $J = 7.7$  Hz, 1H), 3.73 (q,  $J = 7.0$  Hz, 1H), 2.24 (d,  $J = 7.2$  Hz, 2H), 1.70 – 1.60 (m, 8H), 1.26 – 1.19 (m, 1H), 1.15 – 1.06 (m, 3H), 0.94 – 0.85 (m, 2H).

$^{13}\text{C}$  NMR (151 MHz,  $\text{CDCl}_3$ )  $\delta$  171.56, 159.88 (d,  $J = 249.4$  Hz), 153.95 (dd,  $J = 290.1, 286.4$  Hz), 142.13 (d,  $J = 7.4$  Hz), 137.79, 135.23, 135.08 (dd,  $J = 4.4, 3.3$  Hz), 131.30 (d,  $J = 3.9$  Hz), 128.95, 128.91 (d,  $J = 2.9$  Hz), 128.49, 128.24 (d,  $J = 13.6$  Hz), 127.80, 124.43 (t,  $J = 2.6$  Hz), 123.61 (d,  $J = 3.3$  Hz), 119.60 (t,  $J = 3.0$  Hz), 118.67, 115.37 (d,  $J = 23.6$  Hz), 90.86 (dd,  $J = 22.2, 12.5$  Hz), 47.67, 35.64, 35.19, 32.81, 26.36, 26.01, 18.69.

$^{19}\text{F}$  NMR (564 MHz,  $\text{CDCl}_3$ )  $\delta$  -90.97 (d,  $J = 43.1$  Hz, 1F), -91.19 (d,  $J = 42.9$  Hz, 1F), -116.72 (s, 1F).

HRMS (ESI) (m/z):  $[\text{M}+\text{Na}]^+$  Calcd for  $\text{C}_{30}\text{H}_{30}\text{F}_3\text{NNaO}^+$ , 500.2172; found: 500.2176.

***N*-(3-(3-cyclohexyl-1,1-difluoroprop-1-en-2-yl)phenyl)-4-(*N,N*-dipropylsulfamoyl)benzamide (49)**

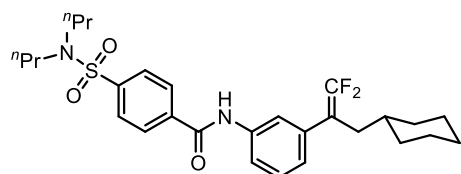

The substrate was prepared following the general procedure A using **S24** (45.4 mg, 0.1 mmol, 1.0 equiv.), 2-cyclohexyl-2-methyl-2,3-dihydroquinazolin-4(1*H*)-one (48.8 mg, 0.2 mmol, 2.0 equiv.), 4CzIPN (3.2 mg, 4 mol%),  $\text{Na}_2\text{CO}_3$  (15.9 mg, 0.15 mmol, 1.5 equiv.), anhydrous DMF (1 mL). The

product **49** was isolated using flash column chromatography on silica gel (petroleum ether/ethyl acetate = 5:1) as a colorless oil (29.1 mg, 56%).

**<sup>1</sup>H NMR (600 MHz, CDCl<sub>3</sub>)** δ 8.35 (s, 1H), 7.93 (d, *J* = 8.3 Hz, 2H), 7.76 (d, *J* = 8.2 Hz, 2H), 7.68 (d, *J* = 7.9 Hz, 1H), 7.63 (s, 1H), 7.36 (t, *J* = 7.9 Hz, 1H), 7.11 (d, *J* = 7.6 Hz, 1H), 3.10 – 3.04 (m, 4H), 2.30 – 2.26 (m, 2H), 1.72 – 1.62 (m, 5H), 1.57 – 1.48 (m, 4H), 1.30 – 1.25 (m, 1H), 1.15 – 1.09 (m, 3H), 0.96 – 0.90 (m, 2H), 0.86 (t, *J* = 7.4 Hz, 6H).

**<sup>13</sup>C NMR (151 MHz, CDCl<sub>3</sub>)** δ 164.71, 154.01 (dd, *J* = 290.6, 286.5 Hz), 142.75, 138.73, 137.87, 135.15 (dd, *J* = 4.7, 3.2 Hz), 129.10, 127.93, 127.28, 124.81 (dd, *J* = 4.5, 2.7 Hz), 120.10 – 120.02 (m), 119.10, 90.90 (dd, *J* = 22.4, 12.5 Hz), 49.95, 35.68, 35.18, 32.83, 26.37, 26.03, 21.91, 11.13.

**<sup>19</sup>F NMR (564 MHz, CDCl<sub>3</sub>)** δ -90.84 (d, *J* = 42.7 Hz, 1F), -91.09 (d, *J* = 43.0 Hz, 1F).

**HRMS (ESI) (m/z):** [M+H]<sup>+</sup> Calcd for C<sub>28</sub>H<sub>37</sub>F<sub>2</sub>N<sub>2</sub>O<sub>3</sub>S<sup>+</sup>, 519.2487; found: 519.2484.

**2-(1-(4-chlorobenzoyl)-5-methoxy-2-methyl-1*H*-indol-3-yl)-*N*-(3-(3-cyclohexyl-1,1-difluoroprop-1-en-2-yl) phenyl) acetamide (**50**)**

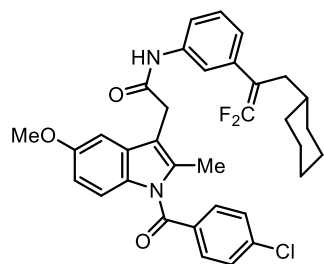

The substrate was prepared following the general procedure A using **S30** (78.9 mg, 0.15 mmol, 1.5 equiv.), 2-cyclohexyl-2-methyl-2,3-dihydroquinazolin-4(1*H*)-one (24.4 mg, 0.1 mmol, 1.0 equiv.), 4CzIPN (3.2 mg, 4 mol%), Na<sub>2</sub>CO<sub>3</sub> (15.9 mg, 0.15 mmol, 1.5 equiv.), anhydrous DMF (1 mL). The product **50** was isolated using flash column chromatography on silica gel (petroleum ether/ethyl acetate = 5:1) as a light yellow oil (30.7 mg, 52%).

**<sup>1</sup>H NMR (600 MHz, CDCl<sub>3</sub>)** δ 7.64 – 7.60 (m, 2H), 7.46 (d, *J* = 8.5 Hz, 3H), 7.35 – 7.30 (m, 2H), 7.24 (t, *J* = 7.9 Hz, 1H), 7.02 (d, *J* = 7.6 Hz, 1H), 6.96 (d, *J* = 2.4 Hz, 1H), 6.87 (d, *J* = 9.0 Hz, 1H), 6.71 (dd, *J* = 9.0, 2.4 Hz, 1H), 3.80 (d, *J* = 2.5 Hz, 5H), 2.44 (s, 3H), 2.24 – 2.18 (m, 2H), 1.67 – 1.54 (m, 5H), 1.23 – 1.17 (m, 1H), 1.12 – 1.04 (m, 3H), 0.92 – 0.84 (m, 2H).

**<sup>13</sup>C NMR (151 MHz, CDCl<sub>3</sub>)** δ 168.33, 168.27, 156.39, 153.90 (dd, *J* = 290.1, 286.4 Hz), 139.64, 137.52, 136.68, 135.02 (dd, *J* = 4.6, 2.8 Hz), 133.44, 131.17, 130.94, 130.19, 129.21, 128.88, 124.59 (t, *J* = 2.7 Hz), 119.96 (t, *J* = 2.9 Hz), 119.05, 115.20, 112.43, 112.28, 100.76, 90.82 (dd, *J* = 22.1, 12.7 Hz), 55.75, 35.63, 35.16, 33.33, 32.79, 26.35, 26.00, 13.36.

**<sup>19</sup>F NMR (564 MHz, CDCl<sub>3</sub>)** δ -90.93 (d, *J* = 43.0 Hz, 1F), -91.15 (d, *J* = 43.0 Hz, 1F).

**HRMS (ESI) (m/z):** [M+H]<sup>+</sup> Calcd for C<sub>34</sub>H<sub>34</sub>ClF<sub>2</sub>N<sub>2</sub>O<sub>3</sub><sup>+</sup>, 591.2221; found: 591.2219.

**4-(3-cyclohexyl-1,1-difluoroprop-1-en-2-yl)phenyl (S)-2-(6-methoxynaphthalen-2-yl)propanoate (51)**

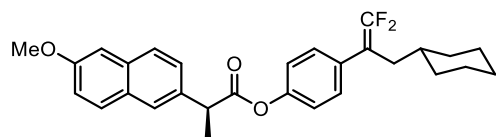

The substrate was prepared following the general procedure A using **S26** (60.0 mg, 0.15 mmol, 1.5 equiv.), 2-cyclohexyl-2-methyl-2,3-dihydroquinazolin-4(1*H*)-one (24.4 mg, 0.1 mmol, 1.0 equiv.), 4CzIPN (3.2 mg, 4 mol%), Na<sub>2</sub>CO<sub>3</sub> (15.9 mg, 0.15 mmol, 1.5 equiv.), anhydrous DMF (1 mL). The product **51** was isolated using flash column chromatography on silica gel (petroleum ether/ethyl acetate = 15:1) as a colorless oil (32.5 mg, 70%).

**<sup>1</sup>H NMR (600 MHz, CDCl<sub>3</sub>)** δ 7.75 (dd, *J* = 17.4, 7.9 Hz, 3H), 7.50 (d, *J* = 8.5 Hz, 1H), 7.25 (d, *J* = 7.9 Hz, 2H), 7.21 – 7.12 (m, 2H), 6.98 (d, *J* = 8.5 Hz, 2H), 4.10 (q, *J* = 7.1 Hz, 1H), 3.93 (s, 3H), 2.22 (d, *J* = 7.2 Hz, 2H), 1.70 (d, *J* = 7.2 Hz, 3H), 1.66 – 1.57 (m, 5H), 1.25 – 1.18 (m, 1H), 1.12 – 1.05 (m, 3H), 0.94 – 0.84 (m, 2H).

**<sup>13</sup>C NMR (151 MHz, CDCl<sub>3</sub>)** δ 173.13, 157.75, 153.96 (dd, *J* = 290.4, 286.0 Hz), 149.69, 135.04, 133.82, 131.57 (dd, *J* = 4.6, 3.1 Hz), 129.31, 129.20 (t, *J* = 3.2 Hz), 128.98, 127.37, 126.14, 126.08, 121.29, 119.12, 105.59, 90.39 (dd, *J* = 22.7, 12.5 Hz), 55.32, 45.58, 35.52, 35.20, 32.80, 26.36, 25.99, 18.46.

**<sup>19</sup>F NMR (564 MHz, CDCl<sub>3</sub>)** δ -91.09 (d, *J* = 43.6 Hz, 1F), -91.52 (d, *J* = 43.5 Hz, 1F).

**HRMS (ESI) (m/z):** [M+H]<sup>+</sup> Calcd for C<sub>29</sub>H<sub>31</sub>F<sub>2</sub>O<sub>3</sub><sup>+</sup>, 465.2236; found: 465.2232.

**4-(3-cyclohexyl-1,1-difluoroprop-1-en-2-yl)phenyl 5-(2,5-dimethylphenoxy)-2,2-dimethylpentanoate (52)**

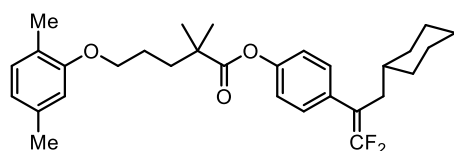

The substrate was prepared following the general procedure A using **S27** (63.0 mg, 0.15 mmol, 1.5 equiv.), 2-cyclohexyl-2-methyl-2,3-dihydroquinazolin-4(1*H*)-one (24.4 mg, 0.1 mmol, 1.0 equiv.), 4CzIPN (3.2 mg, 4 mol%), Na<sub>2</sub>CO<sub>3</sub> (15.9 mg, 0.15 mmol, 1.5 equiv.), anhydrous DMF (1 mL). The product **52** was isolated using flash column chromatography on silica gel (petroleum ether/ethyl acetate = 20:1) as a colorless oil (29.1 mg, 60%).

**<sup>1</sup>H NMR (600 MHz, CDCl<sub>3</sub>)** δ 7.30 (d, *J* = 8.1 Hz, 2H), 7.06 – 6.99 (m, 3H), 6.67 (d, *J* = 7.5 Hz, 1H), 6.64 (s, 1H), 4.00 (d, *J* = 4.3 Hz, 2H), 2.31 (s, 3H), 2.28 – 2.24 (m, 2H), 2.19 (s, 3H), 1.91 – 1.85 (m, 4H), 1.70 – 1.59 (m, 5H), 1.38 (s, 6H), 1.32 – 1.22 (m, 1H), 1.18 – 1.08 (m, 3H), 0.98 – 0.87 (m, 2H).

**<sup>13</sup>C NMR (151 MHz, CDCl<sub>3</sub>)** δ 176.30, 156.84, 153.99 (dd, *J* = 290.3, 286.0 Hz), 149.85, 136.47, 131.47 (dd, *J* = 4.7, 3.2 Hz), 130.34, 129.26 (t, *J* = 3.3 Hz), 123.60, 121.43, 120.75, 111.93, 90.43 (dd, *J* = 22.6, 12.6 Hz), 67.74, 42.46, 37.15, 35.56 (d, *J* = 1.9 Hz), 35.25, 32.83, 26.38, 26.02, 25.27, 25.14, 21.40, 15.80.

**<sup>19</sup>F NMR (564 MHz, CDCl<sub>3</sub>)** δ -86.90 (d, *J* = 43.7 Hz, 1F), -87.30 (d, *J* = 43.6 Hz, 1F).

**HRMS (ESI) (m/z):** [M+Na]<sup>+</sup> Calcd for C<sub>30</sub>H<sub>38</sub>F<sub>2</sub>NaO<sub>3</sub><sup>+</sup>, 507.2681; found: 507.2688.

**(3*S*,8*S*,9*S*,10*R*,13*S*,14*S*,17*S*)-17-acetyl-10,13-dimethyl-2,3,4,7,8,9,10,11,12,13,14,15,16,17-tetradecahydro-1*H*-cyclopenta[*a*]phenanthren-3-yl 4-(3-cyclohexyl-1,1-difluoroprop-1-en-2-yl)benzoate (53)**

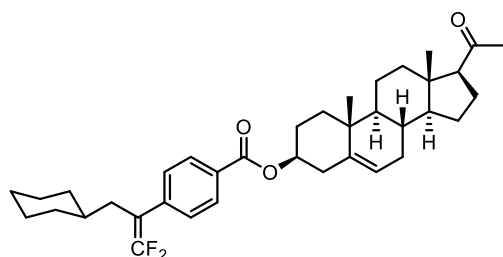

The substrate was prepared following the general procedure B using **S28** (77.1 mg, 0.15 mmol, 1.5 equiv.), diethyl 4-cyclohexyl-2,6-dimethyl-1,4-dihydropyridine-3,5-dicarboxylate (33.5 mg, 0.1 mmol, 1.0 equiv.), Eosin Y (2.6 mg, 4 mol%), Na<sub>2</sub>CO<sub>3</sub> (15.9 mg, 0.15 mmol, 1.5 equiv.), anhydrous DMF (1 mL). The product **53** was isolated using flash column chromatography on silica gel (petroleum ether/ethyl acetate = 10:1) as a white solid (43.4 mg, 75%).

**<sup>1</sup>H NMR (600 MHz, CDCl<sub>3</sub>)** δ 8.01 (d, *J* = 8.4 Hz, 2H), 7.37 (d, *J* = 7.4 Hz, 2H), 5.41 (d, *J* = 4.0 Hz, 1H), 4.88 – 4.82 (m, 1H), 2.54 (t, *J* = 9.0 Hz, 1H), 2.45 (d, *J* = 7.8 Hz, 2H), 2.32 – 2.27 (m, 2H), 2.21 – 2.14 (m, 1H), 2.12 (s, 3H), 2.07 – 1.97 (m, 3H), 1.92 (dt, *J* = 13.3, 3.4 Hz, 1H), 1.75 – 1.56 (m, 10H), 1.53 – 1.45 (m, 3H), 1.26 – 1.14 (m, 4H), 1.11 – 1.01 (m, 7H), 0.90 (dd, *J* = 23.0, 12.8 Hz, 2H), 0.63 (s, 3H).

**<sup>13</sup>C NMR (151 MHz, CDCl<sub>3</sub>)** δ 209.58, 165.63, 154.11 (dd, *J* = 292.1, 287.5 Hz), 139.58, 138.88 – 138.79 (m), 129.59, 129.35, 128.11 (t, *J* = 3.2 Hz), 122.48, 90.87 (dd, *J* = 22.8, 11.8 Hz), 74.43, 63.66, 56.81, 49.87, 43.98, 38.77, 38.15, 37.01, 36.64, 35.78, 34.86, 32.80, 31.81, 31.77, 31.56, 27.83, 26.30, 25.99, 24.47, 22.80, 21.04, 19.35, 13.22.

**<sup>19</sup>F NMR (564 MHz, CDCl<sub>3</sub>)** δ -89.22 (d, *J* = 39.4 Hz, 1F), -89.83 (d, *J* = 39.3 Hz, 1F).

**HRMS (ESI) (m/z):** [M+Na]<sup>+</sup> Calcd for C<sub>37</sub>H<sub>48</sub>F<sub>2</sub>NaO<sub>3</sub><sup>+</sup>, 601.3464; found: 601.3468.

**(8*R*,9*S*,13*S*,14*S*)-3-(3-cyclohexyl-1,1-difluoroprop-1-en-2-yl)-13-methyl-6,7,8,9,11,12,13,14,15,16-decahydro-17*H*-cyclopenta[*a*]phenanthren-17-one (54)**<sup>6</sup>

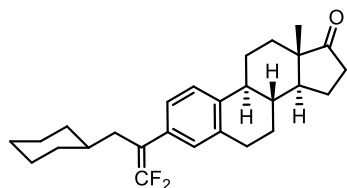

The substrate was prepared following the general procedure A using **S29** (52.2 mg, 0.15 mmol, 1.5 equiv.), 2-cyclohexyl-2-methyl-2,3-dihydroquinazolin-4(1*H*)-one (24.4 mg, 0.1 mmol, 1.0 equiv.), 4CzIPN (3.2 mg, 4 mol%), Na<sub>2</sub>CO<sub>3</sub> (15.9 mg, 0.15 mmol, 1.5 equiv.), anhydrous DMF (1 mL). The product **54** was isolated using flash column chromatography on silica gel (petroleum ether/ethyl acetate = 20:1) as a colorless oil (24.7 mg, 60%).

**<sup>1</sup>H NMR (600 MHz, CDCl<sub>3</sub>)** δ 7.26 (d, *J* = 6.8 Hz, 1H), 7.08 (d, *J* = 8.2 Hz, 1H), 7.03 (s, 1H), 2.92 (dd, *J* = 8.6, 3.7 Hz, 2H), 2.56 – 2.38 (m, 2H), 2.31 (td, *J* = 11.2, 4.0 Hz, 1H), 2.24 (dt, *J* = 7.2, 2.4 Hz, 2H), 2.19 – 1.95 (m, 4H), 1.72 – 1.42 (m, 11H), 1.32 – 1.26 (m, 1H), 1.17 – 1.09 (m, 3H), 0.96 – 0.88 (m, 5H).

**<sup>13</sup>C NMR (151 MHz, CDCl<sub>3</sub>)** δ 220.92, 153.94 (dd, *J* = 289.9, 285.8 Hz), 138.64, 136.39, 131.48 (dd, *J* = 3.8 Hz), 128.72 (t, *J* = 3.2 Hz), 125.60 (t, *J* = 3.1 Hz), 125.29, 90.68 (dd, *J* = 21.8, 12.4 Hz), 50.52, 47.99, 44.35, 38.04, 35.85, 35.57, 35.18, 32.85, 31.58, 29.41, 26.49, 26.41, 26.03, 25.58, 21.58, 13.85.

**<sup>19</sup>F NMR (564 MHz, CDCl<sub>3</sub>)** δ -91.52 (d, *J* = 45.1 Hz, 1F), -91.90 (d, *J* = 45.1 Hz, 1F).

***N*-(3-(3-cyclohexyl-1,1-difluoroprop-1-en-2-yl)phenyl)-2-(10-oxo-10,11-dihydrodibenzo[*b,f*]thiepin-2-yl)propanamide (55)**

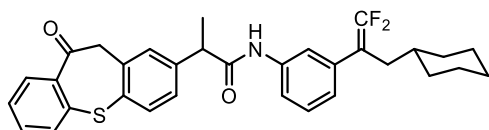

The substrate was prepared following the general procedure B using **S25** (46.7 mg, 0.1 mmol, 1.0 equiv.), diethyl 4-cyclohexyl-2,6-dimethyl-1,4-dihydropyridine-3,5-dicarboxylate (67.0 mg, 0.2 mmol, 2.0 equiv.), Eosin Y (2.6 mg, 4 mol%), Na<sub>2</sub>CO<sub>3</sub> (15.9 mg, 0.15 mmol, 1.5 equiv.), anhydrous DMF (1 mL). The product **55** was isolated using flash column chromatography on silica gel (petroleum ether/ethyl acetate = 5:1) as a colorless oil (31.3 mg, 59%).

**<sup>1</sup>H NMR (600 MHz, CDCl<sub>3</sub>)** δ 8.18 (d, *J* = 8.0 Hz, 1H), 7.61 (dd, *J* = 14.3, 7.9 Hz, 2H), 7.46 – 7.37 (m, 4H), 7.34 – 7.21 (m, 4H), 7.00 (d, *J* = 7.6 Hz, 1H), 4.35 (dd, *J* = 35.3, 11.7 Hz, 2H), 3.66 (q, *J* = 7.0 Hz, 1H), 2.21 (d, *J* = 7.1 Hz, 2H), 1.65 – 1.55 (m, 5H), 1.53 (d, *J* = 7.0 Hz, 3H), 1.22 – 1.16 (m, 1H), 1.13 – 1.03 (m, 3H), 0.92 – 0.80 (m, 2H).

**<sup>13</sup>C NMR (151 MHz, CDCl<sub>3</sub>)** δ 191.42, 171.49, 153.91 (dd, *J* = 290.4, 286.3 Hz), 143.16, 140.09, 138.23, 137.82, 136.04, 135.01 (dd, *J* = 7.3, 3.0 Hz), 133.60, 132.61, 131.89, 131.49, 130.83, 128.89,

128.71, 126.88, 126.22, 124.35 (d,  $J = 2.7$  Hz), 119.56 (t,  $J = 2.9$  Hz), 118.64, 90.85 (dd,  $J = 22.0$ , 12.9 Hz), 51.00, 47.73, 35.61, 35.15, 32.78, 26.35, 25.98, 18.88.

$^{19}\text{F}$  NMR (564 MHz,  $\text{CDCl}_3$ )  $\delta$  -91.03 (d,  $J = 43.2$  Hz, 1F), -91.23 (d,  $J = 43.0$  Hz, 1F).

HRMS (ESI) ( $m/z$ ):  $[\text{M}+\text{H}]^+$  Calcd for  $\text{C}_{32}\text{H}_{32}\text{F}_2\text{NO}_2\text{S}^+$ , 532.2116; found: 532.2122.

**(3*aR*,5*aS*,8*aS*,8*bR*)-5-(2-([1,1'-biphenyl]-4-yl)-3,3-difluoroallyl)-2,2,7,7-tetramethyltetrahydro-5*H*-bis([1,3]dioxolo)[4,5-*b*:4',5'-*d*]pyran (56)**

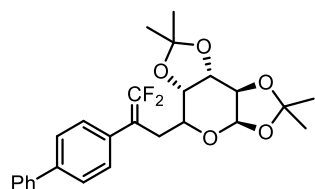

The substrate was prepared following the general procedure B using **S1** (37.3 mg, 0.15 mmol, 1.5 equiv.), diethyl 2,6-dimethyl-4-((3*aR*,5*aS*,8*aS*,8*bR*)-2,2,7,7-tetramethyltetrahydro-5*H*-bis([1,3]dioxolo)[4,5-*b*:4',5'-*d*]pyran-5-yl)-1,4-dihydropyridine-3,5-dicarboxylate (48.1 mg, 0.1 mmol, 1.0 equiv.), Eosin Y (1.3 mg, 2 mol%),  $\text{Na}_2\text{CO}_3$  (15.9 mg, 0.15 mmol, 1.5 equiv.), anhydrous DMF (1 mL). The product **56** was isolated using flash column chromatography on silica gel (petroleum ether/ethyl acetate = 20:1) as a white solid (23.9 mg, 52%).

$^1\text{H}$  NMR (600 MHz,  $\text{CDCl}_3$ )  $\delta$  7.60 – 7.55 (m, 4H), 7.49 – 7.32 (m, 5H), 5.02 (d,  $J = 2.4$  Hz, 1H), 4.49 (d,  $J = 5.3$  Hz, 1H), 4.13 (d,  $J = 2.0$  Hz, 1H), 3.93 (dd,  $J = 9.6$ , 5.4 Hz, 1H), 3.14 (td,  $J = 9.4$ , 3.0 Hz, 1H), 2.90 – 2.82 (m, 1H), 2.63 – 2.56 (m, 1H), 1.52 (s, 3H), 1.35 (s, 3H), 1.33 (s, 3H), 1.28 (s, 3H).

$^{13}\text{C}$  NMR (151 MHz,  $\text{CDCl}_3$ )  $\delta$  154.36 (dd,  $J = 290.7$ , 288.0 Hz), 140.51, 140.03, 132.12 (t,  $J = 3.9$  Hz), 128.78, 128.73 (t,  $J = 3.3$  Hz), 127.39, 127.02, 126.98, 110.79, 108.79, 96.77 (d,  $J = 3.3$  Hz), 88.70 (dd,  $J = 21.6$ , 15.0 Hz), 75.77, 74.29, 73.60, 70.54 (t,  $J = 2.2$  Hz), 30.40 (d,  $J = 1.3$  Hz), 27.90, 27.78, 25.95, 25.78.

$^{19}\text{F}$  NMR (564 MHz,  $\text{CDCl}_3$ )  $\delta$  -88.90 (d,  $J = 39.7$  Hz, 1F), -89.58 (d,  $J = 39.6$  Hz, 1F).

HRMS (ESI) ( $m/z$ ):  $[\text{M}+\text{Na}]^+$  Calcd for  $\text{C}_{26}\text{H}_{28}\text{F}_2\text{NaO}_5^+$ , 481.1797; found: 481.1796.

**(3*aR*,4*R*,6*R*,6*aR*)-4-(2-([1,1'-biphenyl]-4-yl)-3,3-difluoroallyl)-6-methoxy-2,2-dimethyltetrahydrofuro[3,4-*d*][1,3]dioxole (57)<sup>14</sup>**

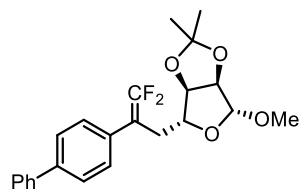

The substrate was prepared following the general procedure B using **S1** (37.3 mg, 0.15 mmol, 1.5 equiv.), diethyl 4-((3*aR*,6*R*,6*aR*)-6-methoxy-2,2-dimethyltetrahydrofuro[3,4-*d*][1,3]dioxol-4-yl)-2,6-dimethyl-1,4-dihydropyridine-3,5-dicarboxylate (42.5 mg, 0.1 mmol, 1.0 equiv.), Eosin Y (1.3

mg, 2 mol%), Na<sub>2</sub>CO<sub>3</sub> (15.9 mg, 0.15 mmol, 1.5 equiv.), anhydrous DMF (1 mL). The product **57** was isolated using flash column chromatography on silica gel (petroleum ether/ethyl acetate = 20:1) as a white solid (34.9 mg, 87%).

**<sup>1</sup>H NMR (600 MHz, CDCl<sub>3</sub>)** δ 7.63 – 7.58 (m, 4H), 7.48 – 7.33 (m, 5H), 4.95 (s, 1H), 4.65 (d, *J* = 5.9 Hz, 1H), 4.57 (d, *J* = 5.9 Hz, 1H), 4.18 (t, *J* = 7.7 Hz, 1H), 3.35 (s, 3H), 2.81 – 2.64 (m, 2H), 1.42 (s, 3H), 1.29 (s, 3H).

**<sup>13</sup>C NMR (151 MHz, CDCl<sub>3</sub>)** δ 154.32 (dd, *J* = 291.0, 288.3 Hz), 140.48, 140.42, 131.54 (dd, *J* = 4.0, 3.4 Hz), 128.86 – 128.78 (m), 127.44, 127.34, 127.02, 112.32, 109.93 (d, *J* = 1.5 Hz), 89.32 (dd, *J* = 21.2, 15.4 Hz), 85.58, 84.48 (t, *J* = 2.8 Hz), 83.54, 55.11, 33.28, 26.38, 24.90. (one carbon signal was overlapped).

**<sup>19</sup>F NMR (564 MHz, CDCl<sub>3</sub>)** δ -89.50 (d, *J* = 39.8 Hz, 1F), -90.06 (d, *J* = 39.8 Hz, 1F).

Crystals suitable for X-ray diffraction were prepared by recrystallization from petroleum ether and ethyl acetate at room temperature.

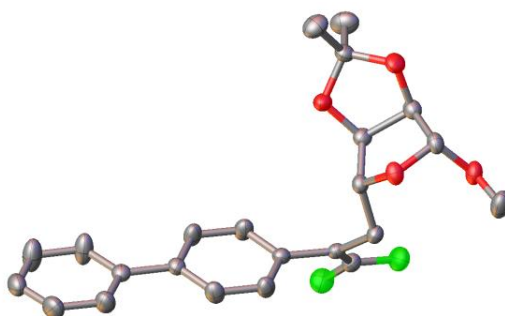

**Figure S2 Crystal data and structure refinement for (3*aR*,4*R*,6*R*,6*aR*)-4-(2-([1,1'-biphenyl]-4-yl)-3,3-difluoroallyl)-6-methoxy-2,2-dimethyltetrahydrofuro[3,4-*d*][1,3]dioxole**

|                        |                                                               |          |
|------------------------|---------------------------------------------------------------|----------|
| Empirical formula      | C <sub>23</sub> H <sub>24</sub> F <sub>2</sub> O <sub>4</sub> |          |
| Formula weight         | 402.42                                                        |          |
| Temperature            | 248 K                                                         |          |
| Wavelength             | 1.34139 Å                                                     |          |
| Crystal system         | Orthorhombic                                                  |          |
| Space group            | P2 <sub>1</sub> 2 <sub>1</sub> 2 <sub>1</sub>                 |          |
| Unit cell dimensions   | a = 5.97500(10) Å                                             | α = 90°. |
|                        | b = 16.6014(4) Å                                              | β = 90°. |
|                        | c = 20.4417(5) Å                                              | γ = 90°. |
| Volume                 | 2027.68(8) Å <sup>3</sup>                                     |          |
| Z                      | 4                                                             |          |
| Density (calculated)   | 1.318 Mg/m <sup>3</sup>                                       |          |
| Absorption coefficient | 0.540 mm <sup>-1</sup>                                        |          |
| F (000)                | 848                                                           |          |
| Crystal size           | 0.07 x 0.07 x 0.05 mm <sup>3</sup>                            |          |



|                                   |                                             |
|-----------------------------------|---------------------------------------------|
| Theta range for data collection   | 2.983 to 55.122°.                           |
| Index ranges                      | -6<=h<=7, -20<=k<=19, -24<=l<=24            |
| Reflections collected             | 23095                                       |
| Independent reflections           | 3868 [R(int) = 0.0414]                      |
| Completeness to theta = 53.594°   | 99.9 %                                      |
| Absorption correction             | Semi-empirical from eq. alents              |
| Max. and min. transmission        | 0.7508 and 0.6240                           |
| Refinement method                 | Full-matrix least-squares on F <sup>2</sup> |
| Data / restraints / parameters    | 3868 / 0 / 265                              |
| Goodness-of-fit on F <sup>2</sup> | 1.063                                       |
| Final R indices [I>2sigma(I)]     | R1 = 0.0419, wR2 = 0.0984                   |
| R indices (all data)              | R1 = 0.0544, wR2 = 0.1060                   |
| Absolute structure parameter      | 0.07(7)                                     |
| Extinction coefficient            | n/a                                         |
| Largest diff. peak and hole       | 0.135 and -0.208 e.Å <sup>-3</sup>          |

## 5. Scaling-up Reaction

### A. Synthesis of *tert*-butyl 4-(3,3-difluoro-2-(naphthalen-2-yl)allyl)piperidine-1-carboxylate

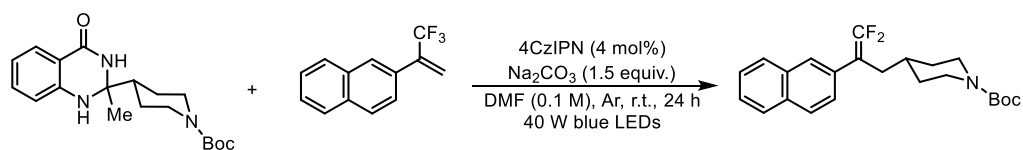

*Tert*-butyl 4-(2-methyl-4-oxo-1,2,3,4-tetrahydroquinazolin-2-yl)piperidine-1-carboxylate (5 mmol, 1.0 equiv.), 4CzIPN (4 mol%), Na<sub>2</sub>CO<sub>3</sub> (7.5 mmol, 1.5 equiv.) were added in a 100 mL Schlenk tube equipped with a stirring bar. The tube was evacuated and filled with argon (repeated for three times), 2-(3,3,3-trifluoroprop-1-en-2-yl)naphthalene (7.5 mmol, 1.5 equiv.) and anhydrous DMF (50 mL) were added using a gastight syringe under argon atmosphere. The reaction mixture was stirred under irradiation with 40 W blue LEDs, maintained at approximately room temperature in the air-conditioned room of 25 °C. After 24 h, ethyl acetate (100 mL) was added to the reaction mixture. The resulting solution was washed with brine (3 × 50 mL) and dried over anhydrous Na<sub>2</sub>SO<sub>4</sub>. The organic layers were combined and concentrated on rotary evaporator. The residue was purified by silica gel column chromatography to give the product (white solid, 1.59 g, 82%, petroleum ether/ethyl acetate = 20:1).

### B. Synthesis of (3*aR*,4*R*,6*R*,6*aR*)-4-(2-([1,1'-biphenyl]-4-yl)-3,3-difluoroallyl)-6-methoxy-2,2-dimethyltetrahydrofuro[3,4-*d*][1,3]dioxole

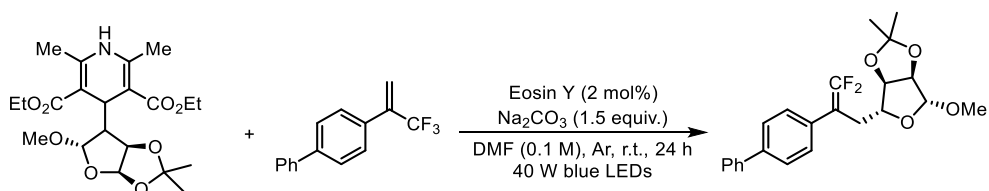

Diethyl 4-((3*aR*,5*S*,6*aR*)-5-methoxy-2,2-dimethyltetrahydrofuro[2,3-*d*][1,3]dioxol-6-yl)-2,6-dimethyl-1,4-dihydropyridine-3,5-dicarboxylate (4 mmol, 1.0 equiv.), 4-(3,3,3-trifluoroprop-1-en-2-yl)-1,1'-biphenyl (1.5 equiv., 6 mmol), Eosin Y (2 mol%), Na<sub>2</sub>CO<sub>3</sub> (6 mmol, 1.5 equiv.) were added in a 100 mL Schlenk tube equipped with a stirring bar. The tube was evacuated and filled with argon (repeated for three times), and anhydrous DMF (40 mL) were added using a gastight syringe under argon atmosphere. The reaction mixture was stirred under irradiation with 40 W blue LEDs, maintained at approximately room temperature in the air-conditioned room of 25 °C. After 24 h, ethyl acetate (80 mL) was added to the reaction mixture. The resulting solution was washed with brine (3 × 40 mL) and dried over anhydrous Na<sub>2</sub>SO<sub>4</sub>. The organic layers were combined and concentrated on rotary evaporator. The residue was purified by silica gel column chromatography to give the product (white solid, 1.0 g, 62%, petroleum ether/ethyl acetate = 20:1).

## 6. Preliminary Mechanistic Studies

### 6.1. Radical Trap Experiment

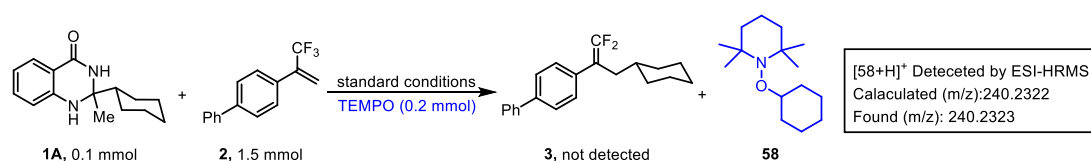

2-cyclohexyl-2-methyl-2,3-dihydroquinazolin-4(1H)-one (24.4 mg, 0.1 mmol, 1.0 equiv.), 4-(3,3,3-trifluoroprop-1-en-2-yl)-1,1'-biphenyl (37.3 mg, 0.15 mmol, 1.5 equiv.), 4CzIPN (1.6 mg, 2 mol%), Na<sub>2</sub>CO<sub>3</sub> (15.9 mg, 0.15 mmol, 1.5 equiv.), TEMPO (0.2 mmol) were added in a 10 mL Schlenk tube equipped with a stirring bar. The tube was evacuated and filled with argon (repeated for three times), and anhydrous DMF (1 mL) were added using a gastight syringe under argon atmosphere. The reaction mixture was stirred under irradiation with 40 W blue LEDs, maintained at approximately room temperature in the air-conditioned room of 25 °C for 24 h. The reaction mixture was sent for HRMS analysis, the compounds **58** were detected by HRMS.

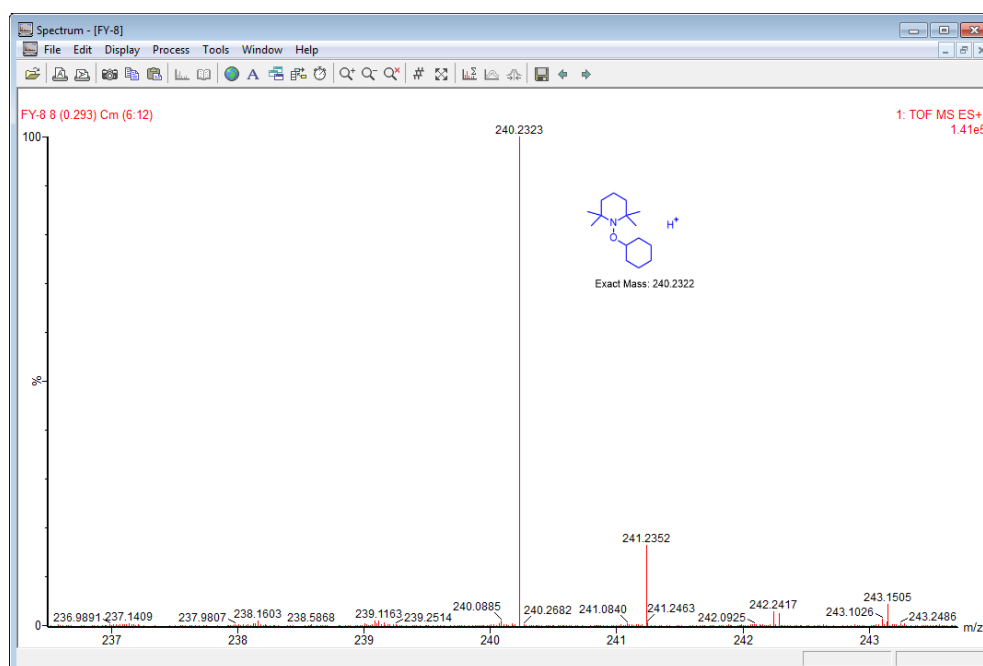

Figure S3 Radical trapping experiment

### 6.2. Radical Clock Experiment

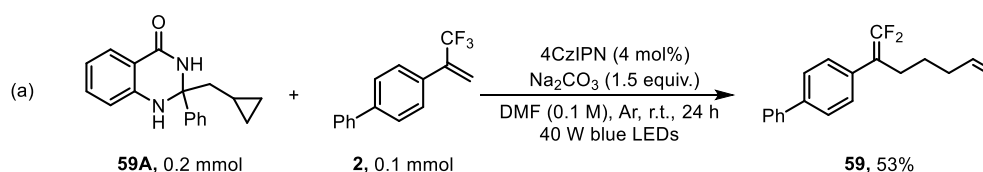

2-(cyclopropylmethyl)-2-phenyl-2,3-dihydroquinazolin-4(1*H*)-one (55.6 mg, 0.2 mmol, 2.0 equiv.), 4-(3,3,3-trifluoroprop-1-en-2-yl)-1,1'-biphenyl (24.8 mg, 0.1 mmol, 1.0 equiv.), 4CzIPN (3.2 mg, 4 mol%), Na<sub>2</sub>CO<sub>3</sub> (15.9 mg, 0.15 mmol, 1.5 equiv.) were added in a 10 mL Schlenk tube equipped with a stirring bar. The tube was evacuated and filled with argon (repeated for three times), and anhydrous DMF (1 mL) was added using a gastight syringe under argon atmosphere. The reaction mixture was stirred under irradiation with 40 W blue LEDs, maintained at approximately room temperature in the air-conditioned room of 25 °C. After 24 h, ethyl acetate (5 mL) was added to the reaction mixture. The resulting solution was washed with brine (3 × 10 mL) and dried over anhydrous Na<sub>2</sub>SO<sub>4</sub>. The organic layers were combined and concentrated on rotary evaporator. The residue was purified by flash column chromatography on silica gel (colorless oil, 15.1 mg, 53%, petroleum ether).

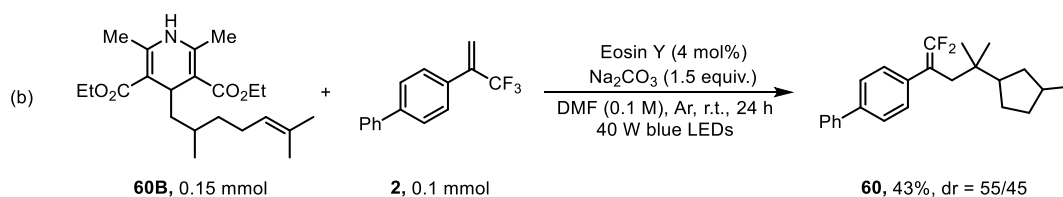

4-(3,3,3-trifluoroprop-1-en-2-yl)-1,1'-biphenyl (24.8 mg, 0.1 mmol, 1.0 equiv.), Eosin Y (2.6 mg, 4 mol%), Na<sub>2</sub>CO<sub>3</sub> (15.9 mg, 0.15 mmol, 1.5 equiv.) were added in a 10 mL Schlenk tube equipped with a stirring bar. The tube was evacuated and filled with argon (repeated for three times), then anhydrous DMF (1 mL) and diethyl 4-(2,6-dimethylhept-5-en-1-yl)-2,6-dimethyl-1,4-dihydropyridine-3,5-dicarboxylate (56.6 mg, 0.15 mmol, 1.5 equiv.) were added using a gastight syringe under argon atmosphere. The reaction mixture was stirred under irradiation with 40 W blue LEDs, maintained at approximately room temperature in the air-conditioned room of 25 °C. After 24 h, ethyl acetate (5 mL) was added to the reaction mixture. The resulting solution was washed with brine (3 × 10 mL) and dried over anhydrous Na<sub>2</sub>SO<sub>4</sub>. The organic layers were combined and concentrated on rotary evaporator. The residue was purified by flash column chromatography on silica gel (colorless oil, 15.2 mg, 43%, petroleum ether).

#### 4-(1,1-difluorohepta-1,6-dien-2-yl)-1,1'-biphenyl (59)<sup>14</sup>

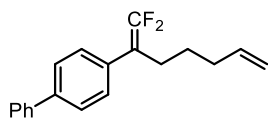

<sup>1</sup>H NMR (600 MHz, CDCl<sub>3</sub>) δ 7.64 – 7.55 (m, 4H), 7.47 – 7.38 (m, 4H), 7.37 – 7.34 (m, 1H), 5.84 – 5.72 (m, 1H), 5.05 – 4.94 (m, 2H), 2.48 – 2.43 (m, 2H), 2.12 – 2.05 (m, 2H), 1.55 – 1.48 (m, 2H).

<sup>13</sup>C NMR (151 MHz, CDCl<sub>3</sub>) δ 153.65 (dd, *J* = 290.3, 287.3 Hz), 140.55, 139.98, 138.08, 132.70 – 132.57 (m), 128.78, 128.55 (t, *J* = 3.4 Hz), 127.36, 127.09, 126.99, 114.95, 91.92 (dd, *J* = 21.1, 13.5 Hz), 33.08, 27.01 (t, *J* = 2.4 Hz), 26.96.

<sup>19</sup>F NMR (564 MHz, CDCl<sub>3</sub>) δ -91.05 (d, *J* = 43.0 Hz, 1F), -91.18 (d, *J* = 43.1 Hz, 1F).

### 4-(1,1-difluoro-4-methyl-4-(3-methylcyclopentyl)pent-1-en-2-yl)-1,1'-biphenyl (60)

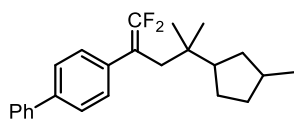

$^1\text{H NMR}$  (600 MHz,  $\text{CDCl}_3$ )  $\delta$  7.62 – 7.56 (m, 4H), 7.46 – 7.33 (m, 5H), 2.37 (d,  $J = 2.2$  Hz, 2H), 1.91 – 1.64 (m, 4H), 1.61 – 1.46 (m, 2H), 1.30 – 1.19 (m, 1H), 1.11 – 0.98 (m, 1H), 0.96 (d,  $J = 6.5$  Hz, 1.3H), 0.89 (d,  $J = 6.7$  Hz, 1.7H), 0.71 (s, 6H).

$^{13}\text{C NMR}$  (151 MHz,  $\text{CDCl}_3$ )  $\delta$  156.38 – 152.14 (m), 140.60, 140.57, 139.65, 139.61, 134.86 – 134.77 (m), 128.83 (dd,  $J = 6.0, 2.9$  Hz), 128.76, 127.30, 126.97, 126.96, 126.87, 126.85, 90.63 (dd,  $J = 21.6, 12.9$  Hz), 50.37, 48.57, 38.48, 38.43, 37.27 (t,  $J = 2.2$  Hz), 37.09 (t,  $J = 2.2$  Hz), 36.77, 35.25, 34.90, 34.61, 34.10, 33.96, 27.70, 26.01, 24.62, 24.56, 24.33, 24.23, 21.10, 20.57.

$^{19}\text{F NMR}$  (564 MHz,  $\text{CDCl}_3$ )  $\delta$  -85.16 (d,  $J = 40.6$  Hz), -87.46 (dd,  $J = 40.6, 17.8$  Hz).

HRMS (ESI) ( $m/z$ ):  $[\text{M}+\text{Na}]^+$  Calcd for  $\text{C}_{24}\text{H}_{28}\text{F}_2\text{Na}^+$ , 377.2051; Found 377.2056.

### 6.3 Light On-Off Experiments

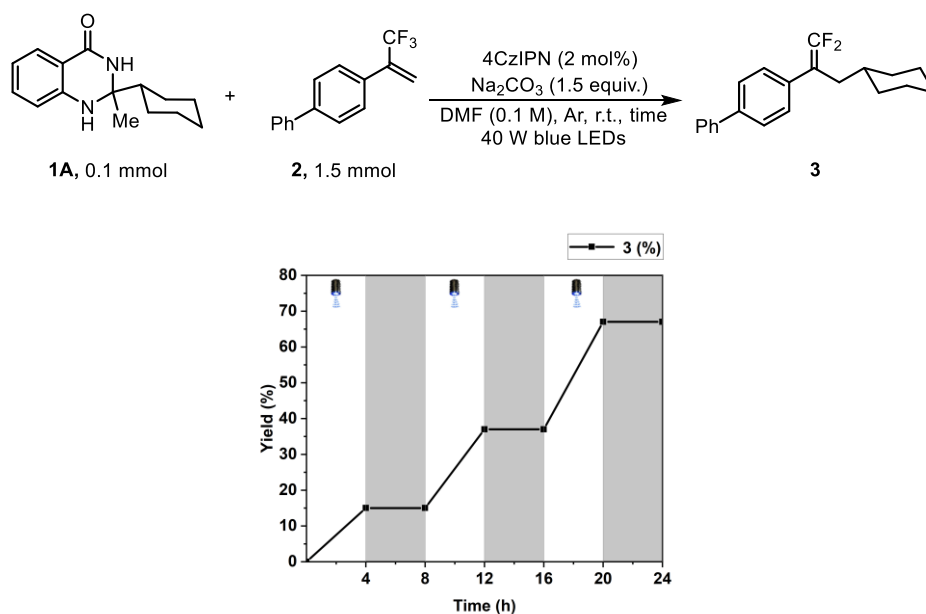

Figure S4 Light on-off experiments

To examine the impact of light, we conducted experiments under alternating periods of irradiation and darkness. These resulted in a total interruption of the reaction progress in the absence of light and recuperation of reactivity on further illumination, which allows precise temporal control over the entire reaction period. These results demonstrated that light is a necessary component of the reaction.

## 7. References

- 1 L. Li, L. Fang, W. Wu and J. Zhu, Visible-Light-Mediated Intermolecular Radical Conjugate Addition for the Construction of Vicinal Quaternary Carbon Centers, *Org. Lett.*, 2020, **22**, 5401–5406.
- 2 K. B. Pal, E. M. Di Tommaso, A. K. Inge and B. Olofsson, Stereospecific Photoredox-Catalyzed Vinylations to Functionalized Alkenes and C-Glycosides, *Angew. Chem., Int. Ed.*, 2023, **62**, e202301368.
- 3 J.-X. Wang, W. Ge, M.-C. Fu and Y. Fu, Photoredox-Catalyzed Allylic Defluorinative Alkoxyacylation of Trifluoromethyl Alkenes through Intermolecular Alkoxyacyl Radical Addition, *Org. Lett.*, 2022, **24**, 1471–1475.
- 4 (a) M. Schäfer, T. Stünkel, C. G. Daniliuc and R. Gilmour, Regio- and Enantioselective Intermolecular Aminofluorination of Alkenes via Iodine(I)/Iodine(III) Catalysis, *Angew. Chem., Int. Ed.*, 2022, **61**, e202205508; (b) Z. Cai, R. Gu, W. Si, Y. Xiang, J. Sun, Y. Jiao and X. Zhang, Photoinduced allylic defluorinative alkylation of trifluoromethyl alkenes with Katritzky salts under catalyst- and metal-free conditions, *Green Chem.*, 2022, **24**, 6830–6835.
- 5 Z. Lin, Y. Lan and C. Wang, Synthesis of *gem*-Difluoroalkenes via Nickel-Catalyzed Reductive C–F and C–O Bond Cleavage, *ACS Catal.*, 2019, **9**, 775–780.
- 6 Y. Liu, X. Tao, Y. Mao, X. Yuan, J. Qiu, L. Kong, S. Ni, K. Guo, Y. Wang and Y. Pan, Electrochemical C–N bond activation for deaminative reductive coupling of Katritzky salts, *Nat. Commun.*, 2021, **12**, 6745.
- 7 R.-Y. Yang, H. Wang and B. Xu, Base promoted *gem*-difluoroolefination of alkyl triflones, *Chem. Commun.*, 2021, **57**, 4831–4834.
- 8 Y.-Q. Guo, Y. Wu, R. Wang, H. Song, Y. Liu and Q. Wang, Photoredox/Hydrogen Atom Transfer Cocatalyzed C–H Difluoroallylation of Amides, Ethers, and Alkyl Aldehydes, *Org. Lett.*, 2021, **23**, 2353–2358.
- 9 X. Li, Y. Jiao, L. Han, J. Sun and X. Zhang, Defluorinative alkylation of 1-trifluoromethyl alkenes with alkyl radicals derived from visible light-induced deoxygenation of xanthate salts: synthesis of *gem*-difluoroalkenes, *Org. Biomol. Chem.*, 2023, **21**, 3330–3334.
- 10 S. Yan, W. Yu, J. Zhang, H. Fan, Z. Lu, Z. Zhang and T. Wang, Access to *gem*-Difluoroalkenes via Organic Photoredox-Catalyzed *gem*-Difluoroallylation of Alkyl Iodides, *J. Org. Chem.*, 2022, **87**, 1574–1584.
- 11 A. A. Gladkov, G. N. Chernov, V. V. Levin, V. A. Kokorekin and A. D. Dilman, Photoredox Activation of Organozinc Reagents: Barbier-Type Reaction of Alkyl Halides with  $\alpha$ -(Trifluoromethyl)styrenes, *Org. Lett.*, 2021, **23**, 9645–9648.
- 12 C. Zhu, Y.-F. Zhang, Z.-Y. Liu, L. Zhou, H. Liu and C. Feng, Selective C–F bond carboxylation of *gem*-difluoroalkenes with CO<sub>2</sub> by photoredox/palladium dual catalysis, *Chem. Sci.*, 2019, **10**, 6721–6726.
- 13 Y. Guo, Y. Cao, H. Song, Y. Liu and Q. Wang, Photoredox relay-catalyzed *gem*-

- difluoroallylation of alkyl iodides, *Chem. Commun.*, 2021, **57**, 9768–9771.
- 14 H.-W. Du, Y. Chen, J. Sun, Q.-S. Gao, H. Wang and M.-D. Zhou, Synthesis of *gem*-Difluoroalkenes via Zn-Mediated Decarboxylative/Defluorinative Cross-Coupling, *Org. Lett.*, 2020, **22**, 9342–9345.

## 8. NMR Spectra

### $^1\text{H}$ NMR (600 MHz, $\text{CDCl}_3$ ) spectrum of compound 3

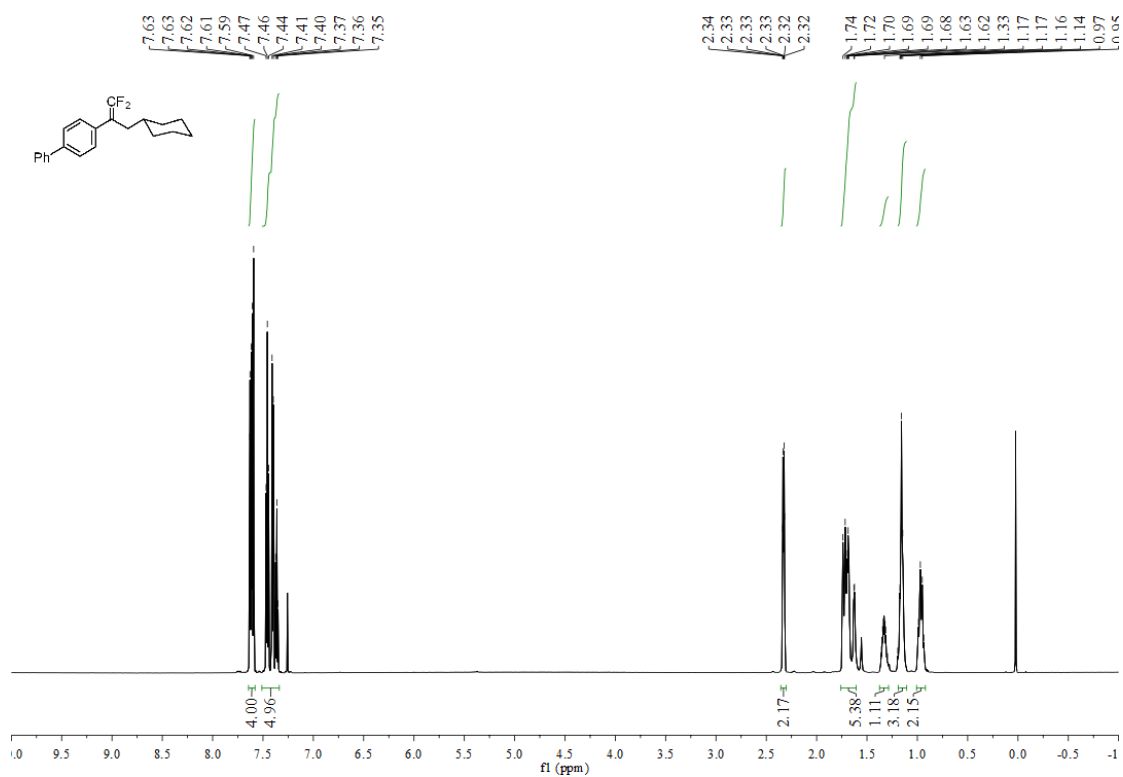

### $^{13}\text{C}$ NMR (151 MHz, $\text{CDCl}_3$ ) spectrum of compound 3

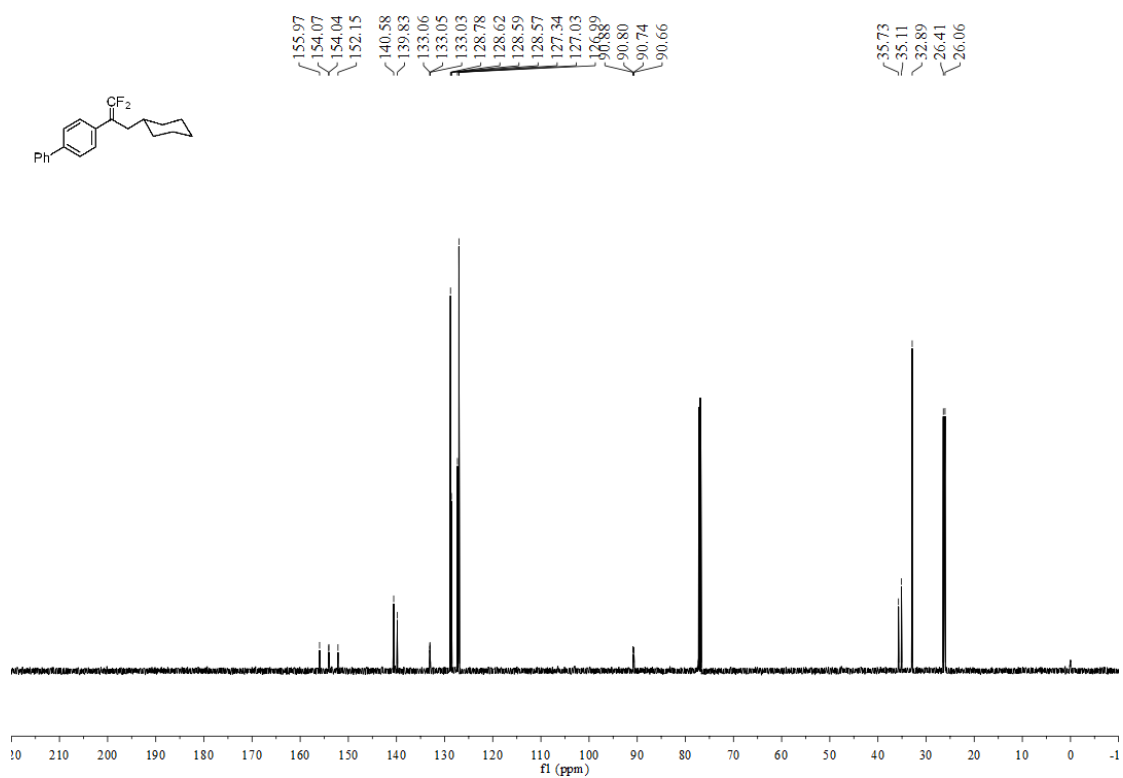



### $^{19}\text{F}$ NMR (564 MHz, $\text{CDCl}_3$ ) spectrum of compound 3

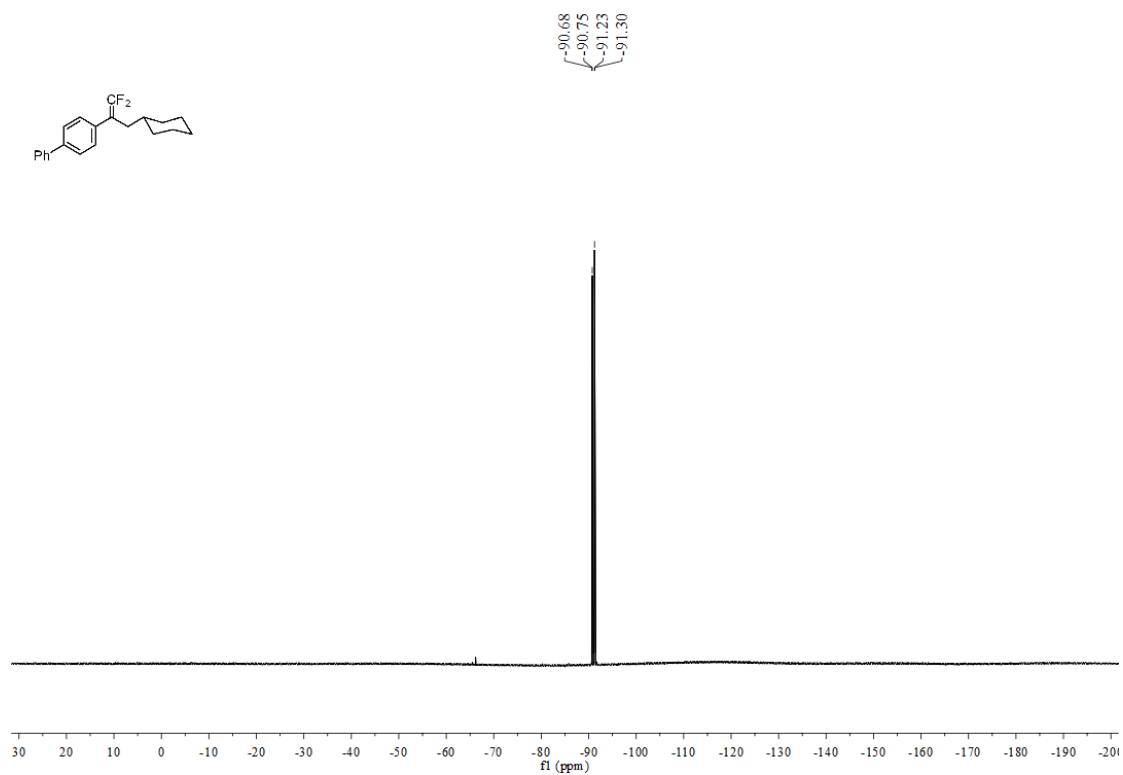

### $^1\text{H}$ NMR (600 MHz, $\text{CDCl}_3$ ) spectrum of compound 4

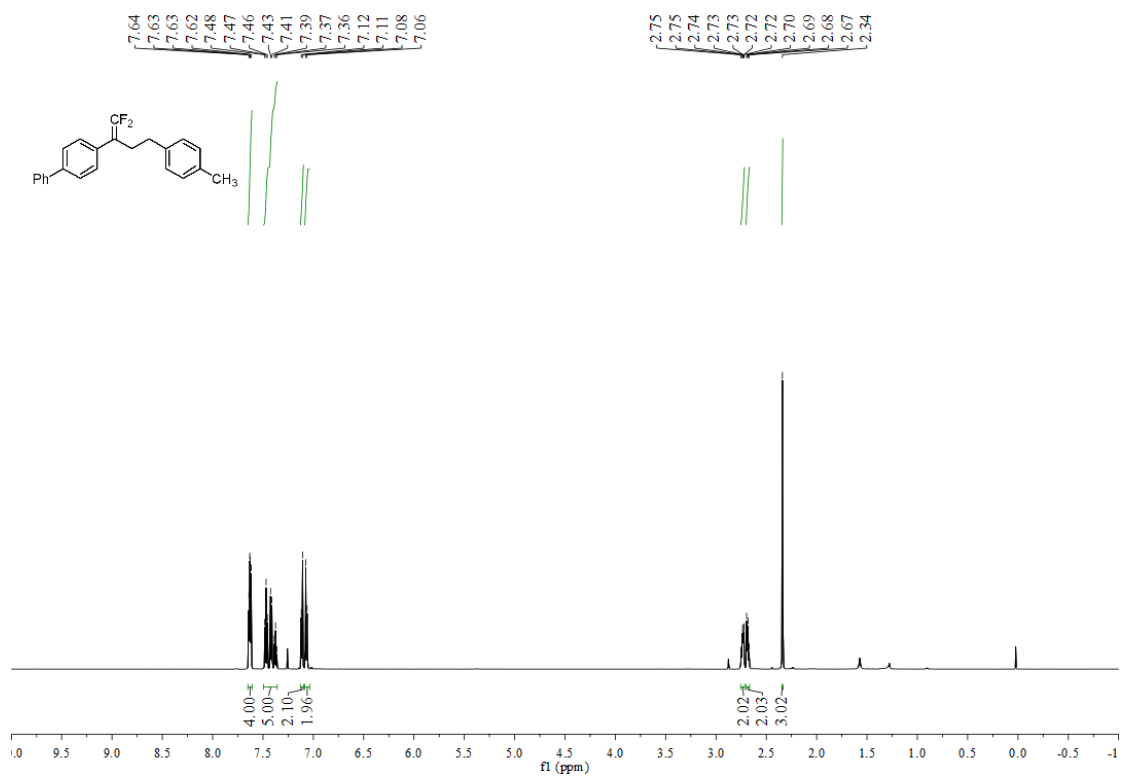

### <sup>13</sup>C NMR (151 MHz, CDCl<sub>3</sub>) spectrum of compound 4

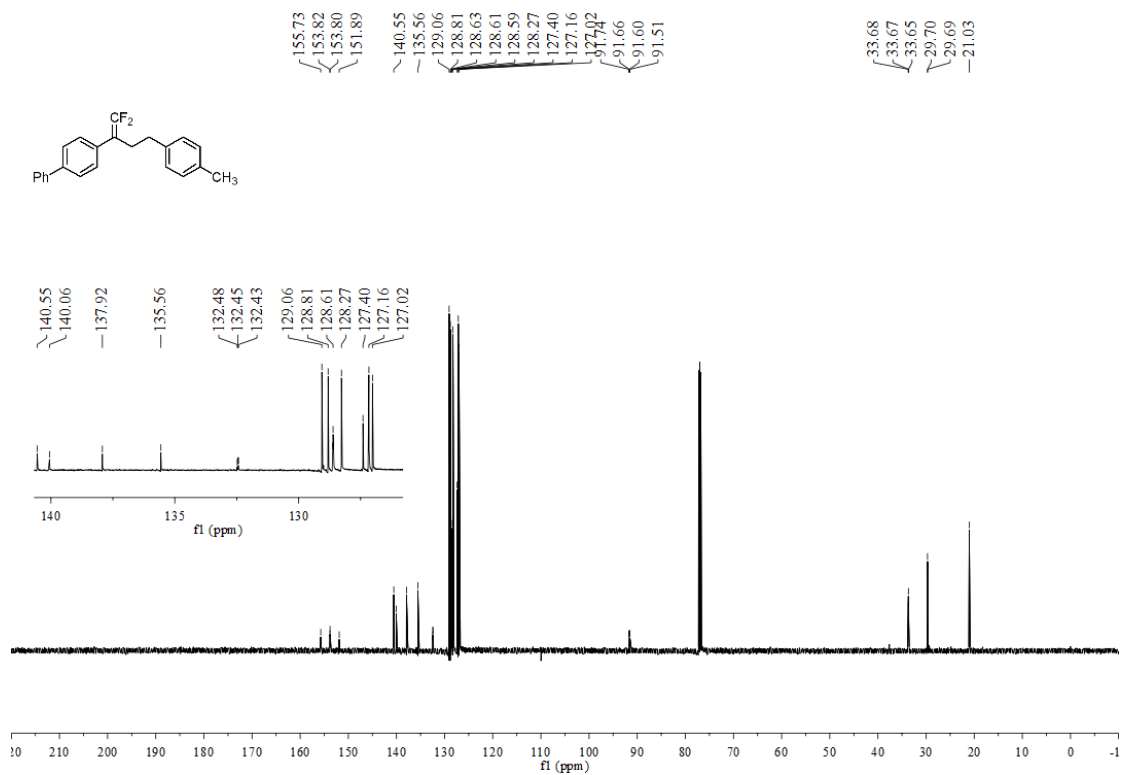

### <sup>19</sup>F NMR (564 MHz, CDCl<sub>3</sub>) spectrum of compound 4

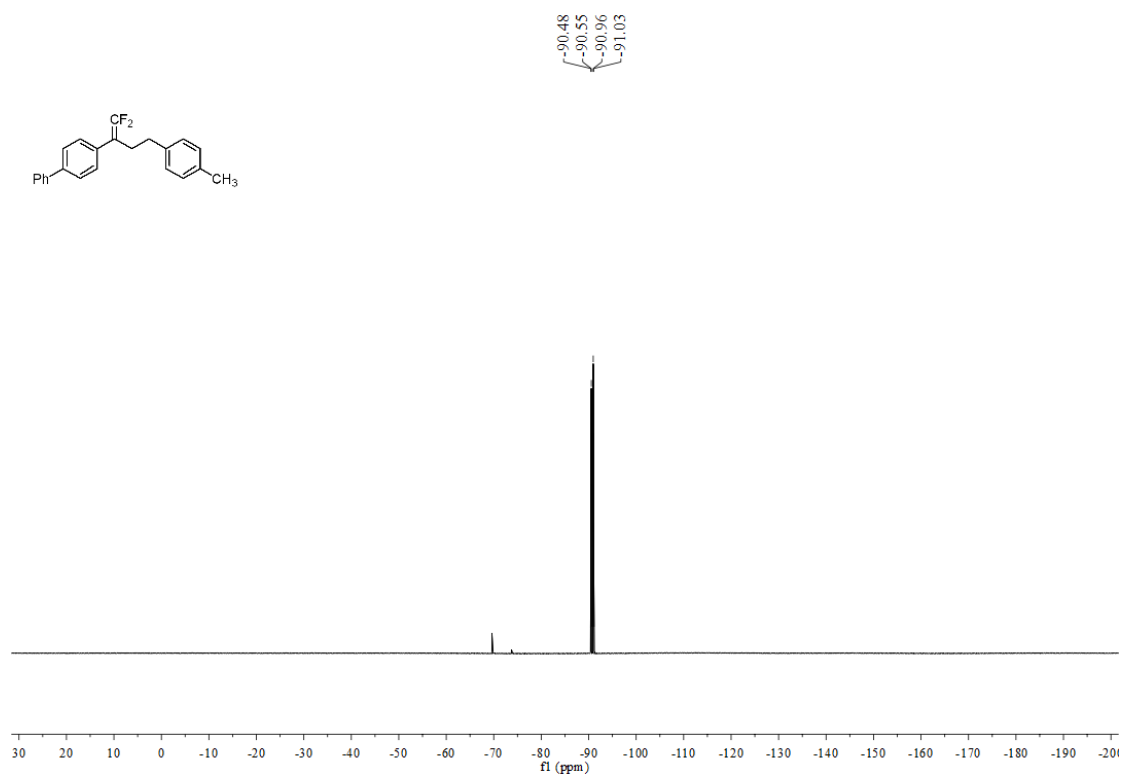

### $^1\text{H}$ NMR (600 MHz, $\text{CDCl}_3$ ) spectrum of compound 5

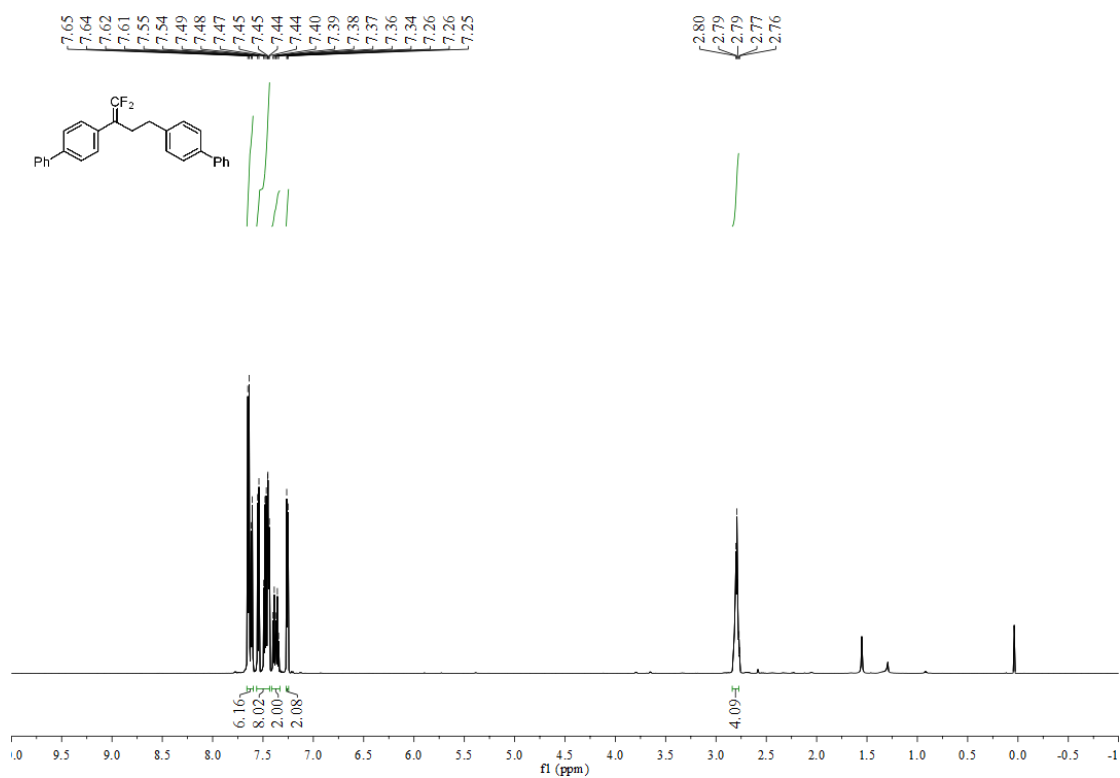

### $^{13}\text{C}$ NMR (151 MHz, $\text{CDCl}_3$ ) spectrum of compound 5

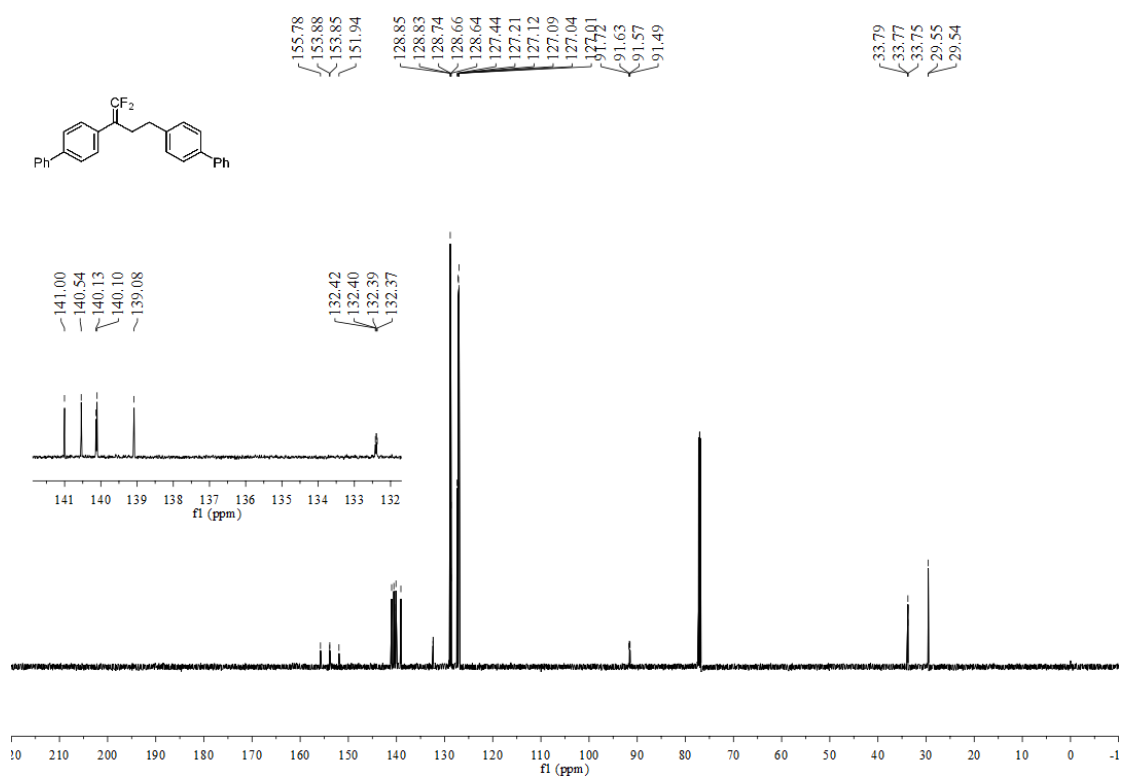

### $^{19}\text{F}$ NMR (564 MHz, $\text{CDCl}_3$ ) spectrum of compound 5

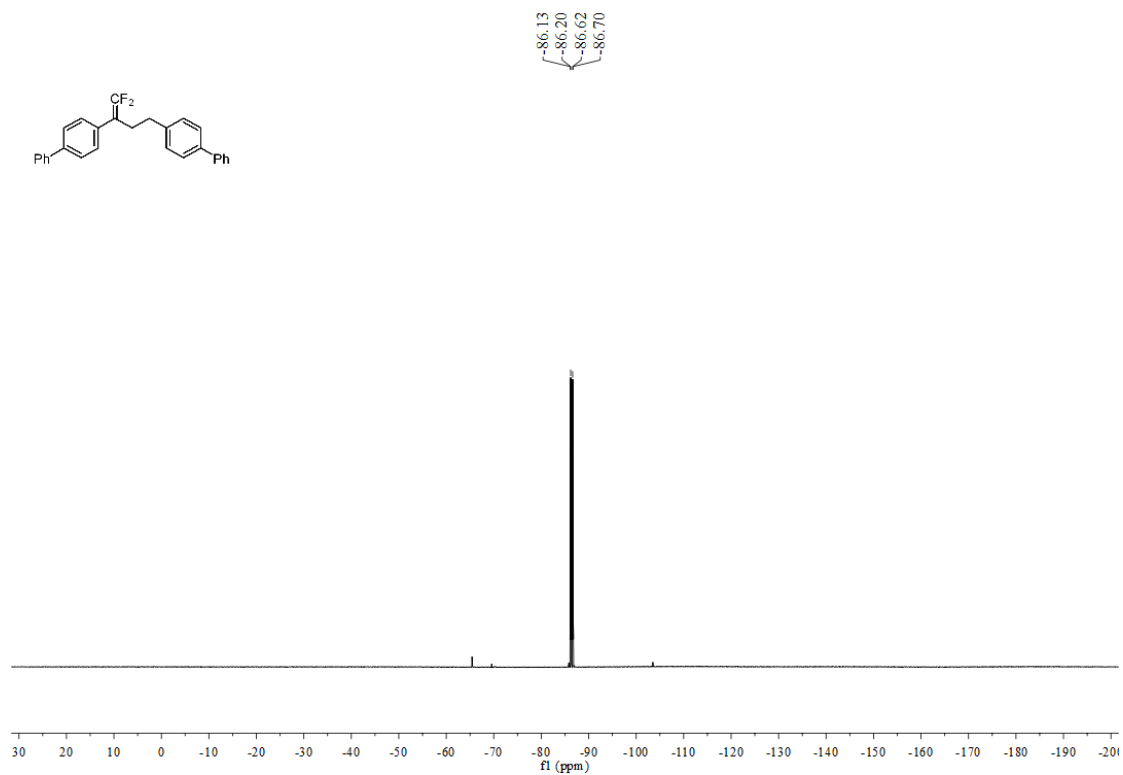

### $^1\text{H}$ NMR (600 MHz, $\text{CDCl}_3$ ) spectrum of compound 6

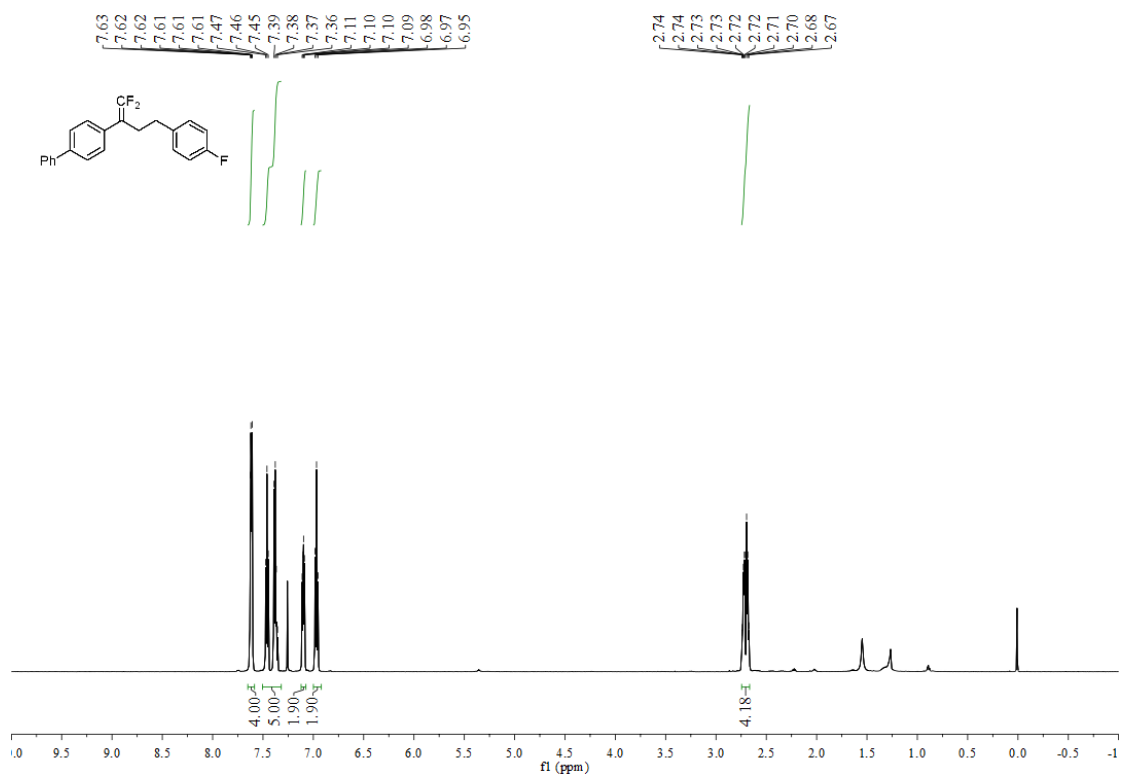

### <sup>13</sup>C NMR (151 MHz, CDCl<sub>3</sub>) spectrum of compound 6

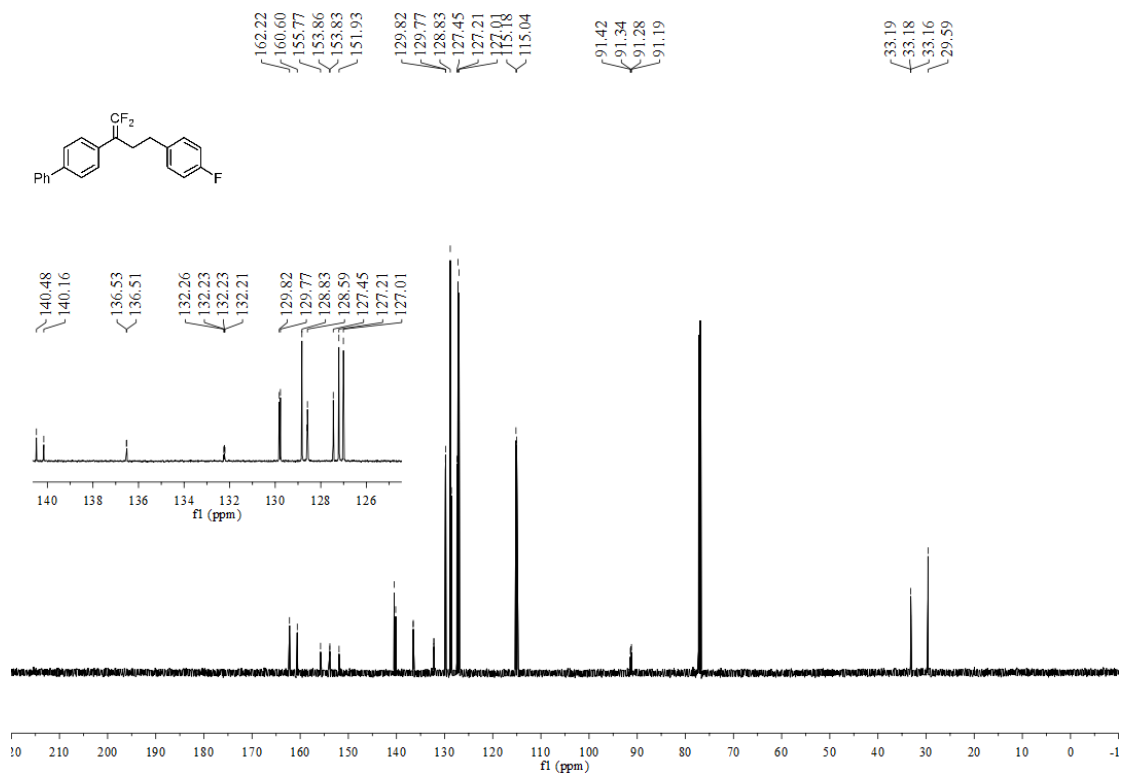

### <sup>19</sup>F NMR (564 MHz, CDCl<sub>3</sub>) spectrum of compound 6

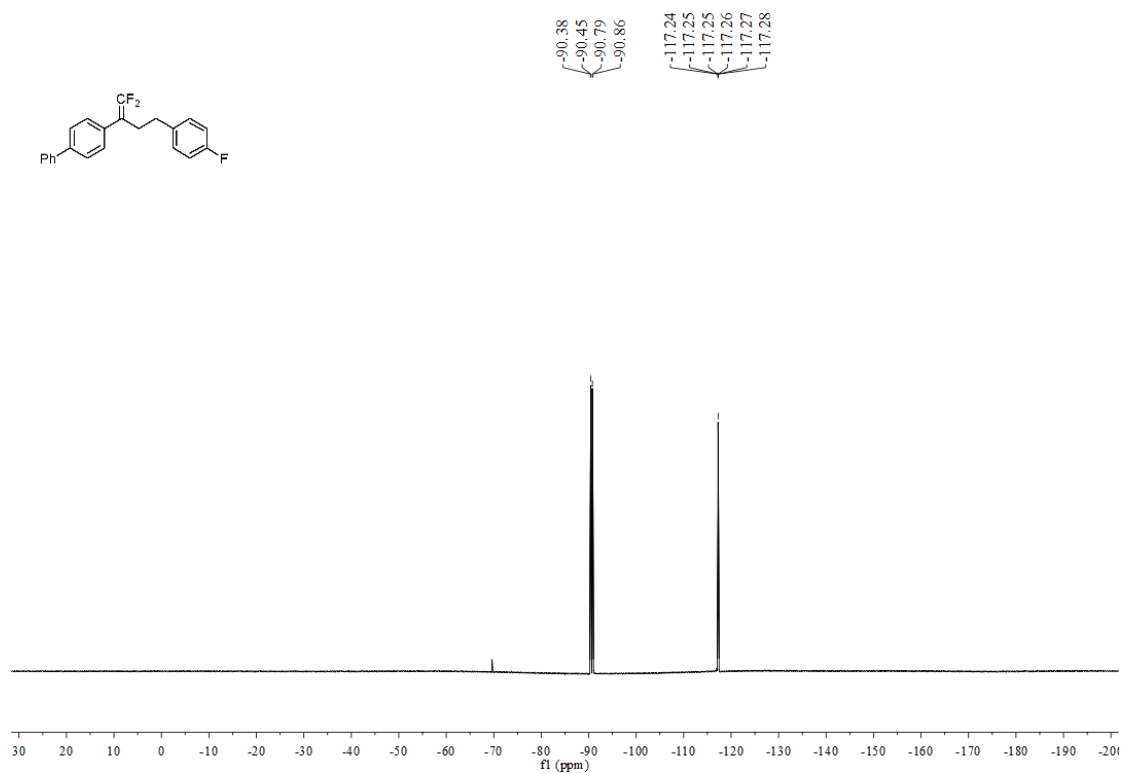

### <sup>1</sup>H NMR (600 MHz, CDCl<sub>3</sub>) spectrum of compound 7

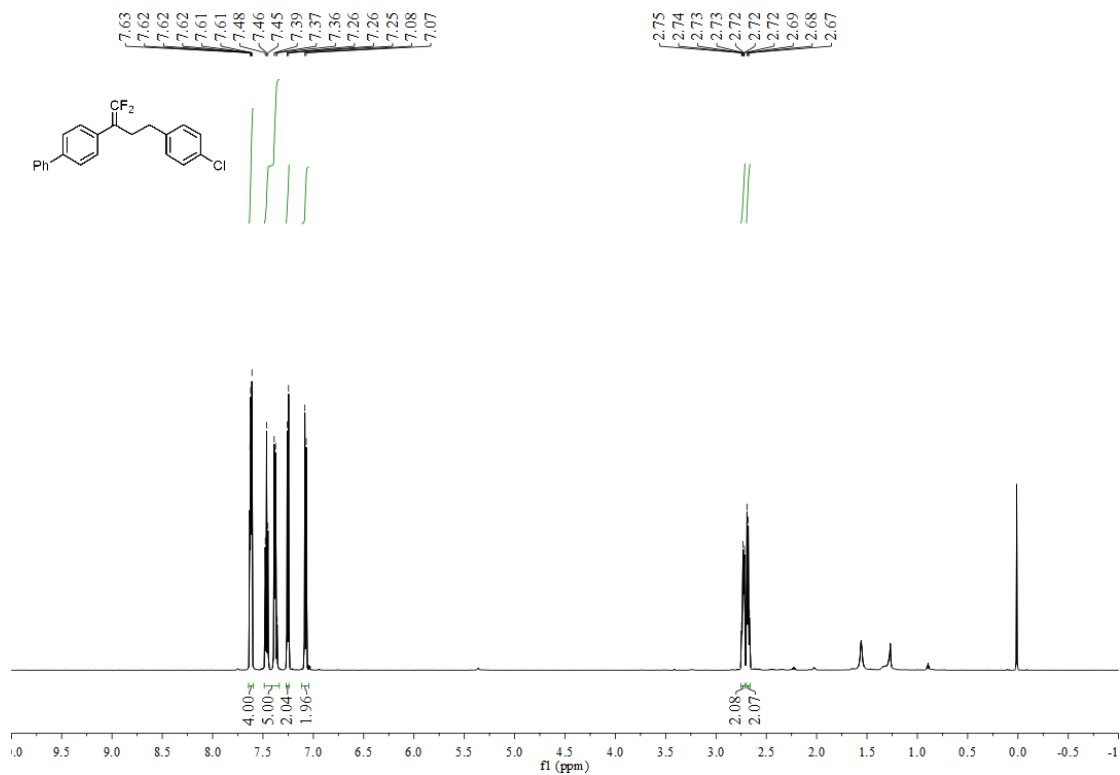

### <sup>13</sup>C NMR (151 MHz, CDCl<sub>3</sub>) spectrum of compound 7

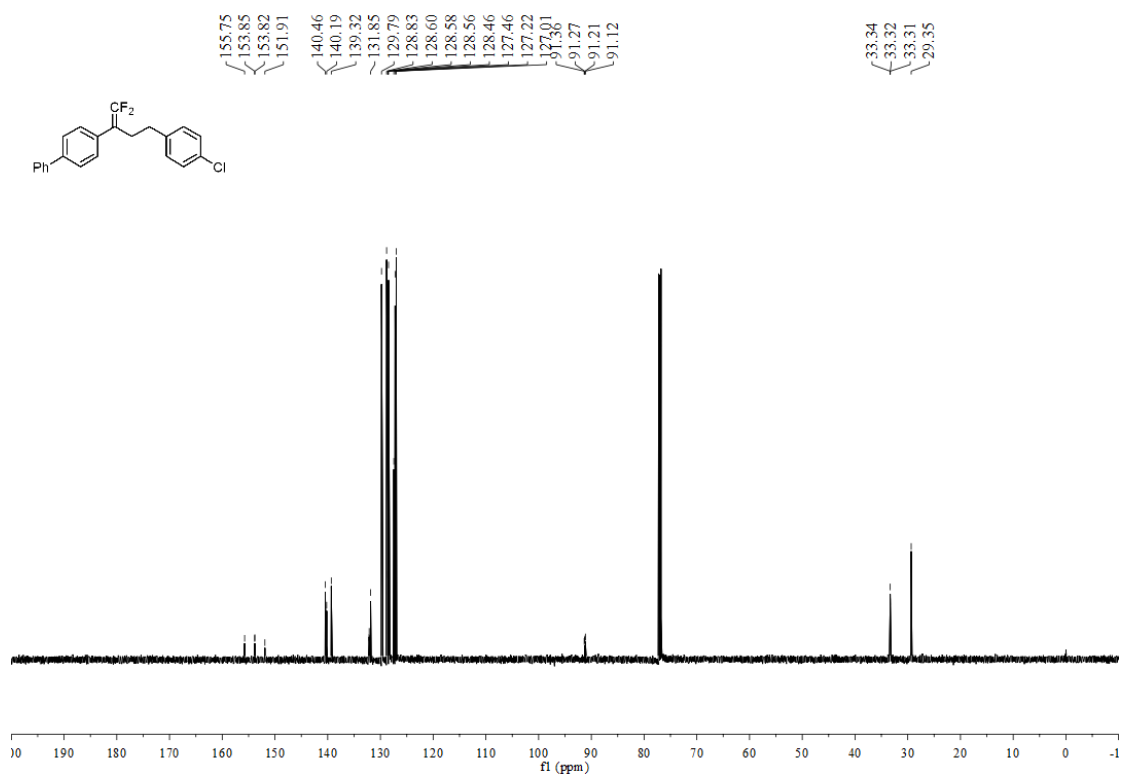

### $^{19}\text{F}$ NMR (564 MHz, $\text{CDCl}_3$ ) spectrum of compound 7

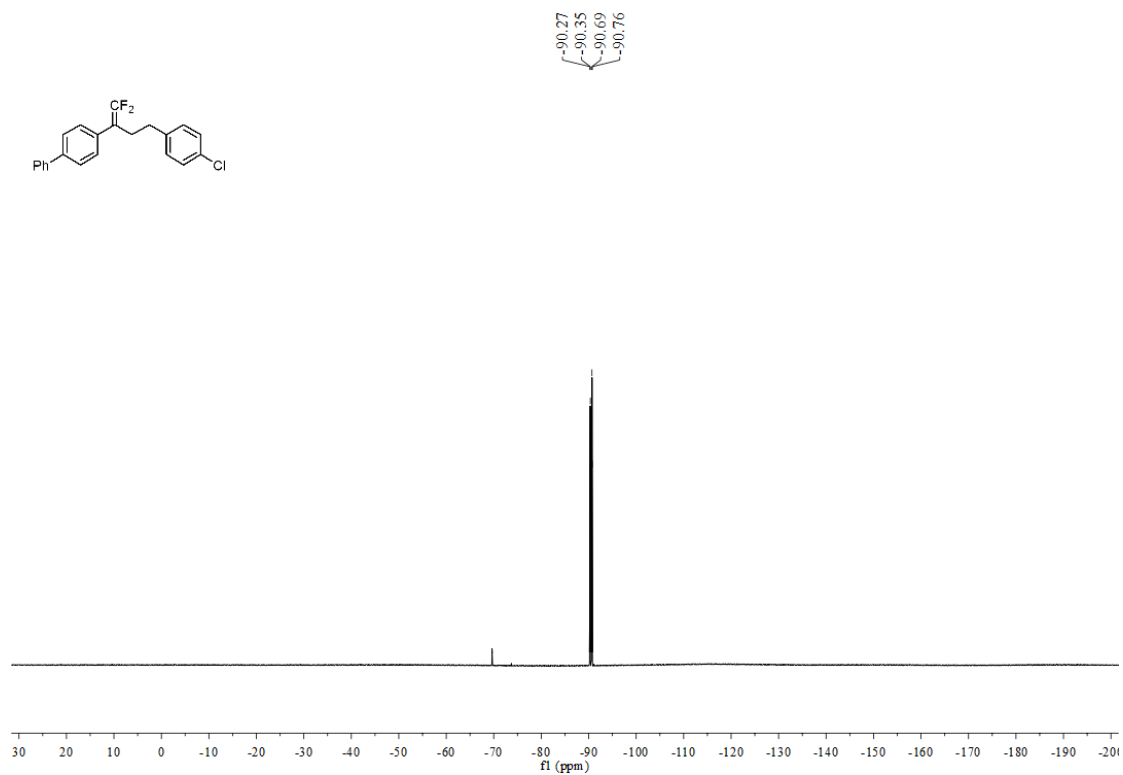

### $^1\text{H}$ NMR (600 MHz, $\text{CDCl}_3$ ) spectrum of compound 8

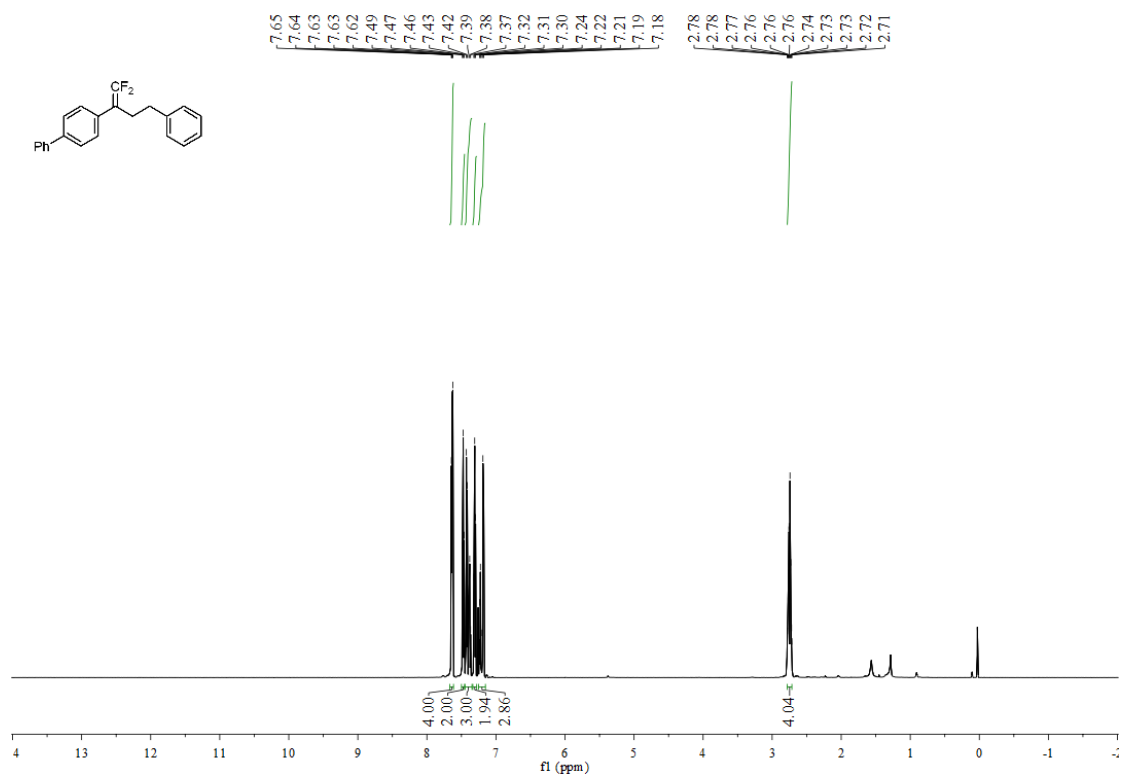

### <sup>13</sup>C NMR (151 MHz, CDCl<sub>3</sub>) spectrum of compound 8

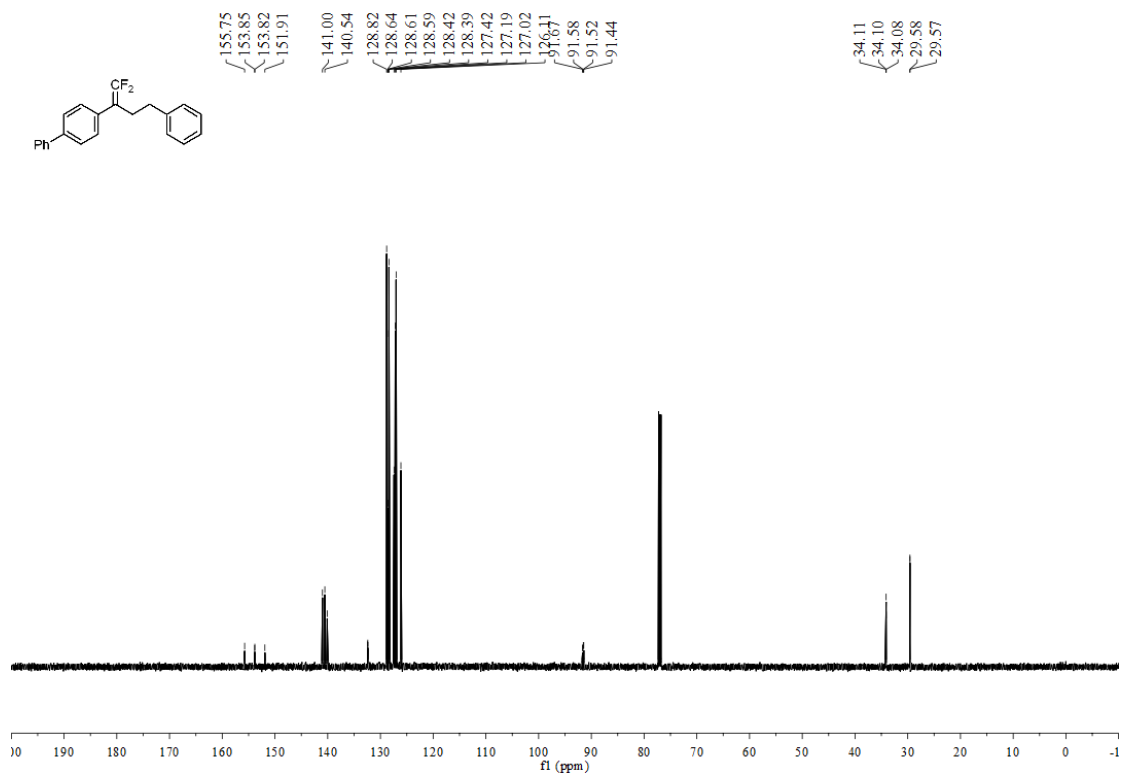

### <sup>19</sup>F NMR (564 MHz, CDCl<sub>3</sub>) spectrum of compound 8

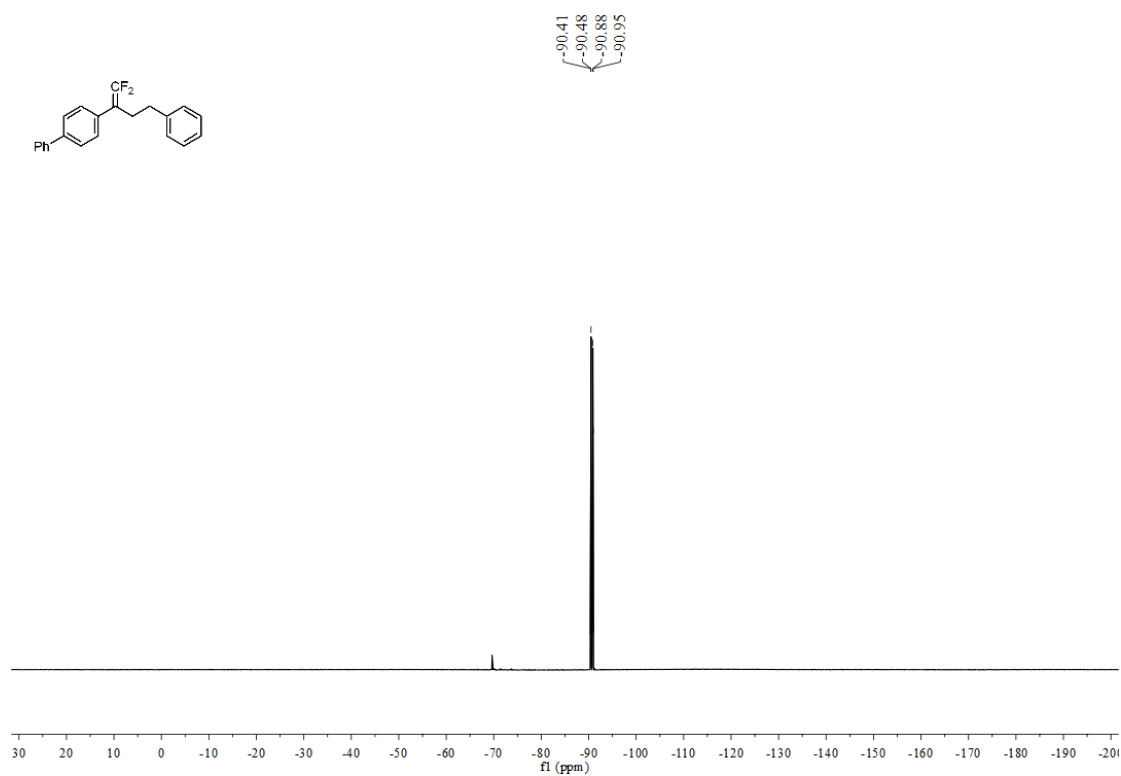



### <sup>1</sup>H NMR (600 MHz, CDCl<sub>3</sub>) spectrum of compound 9

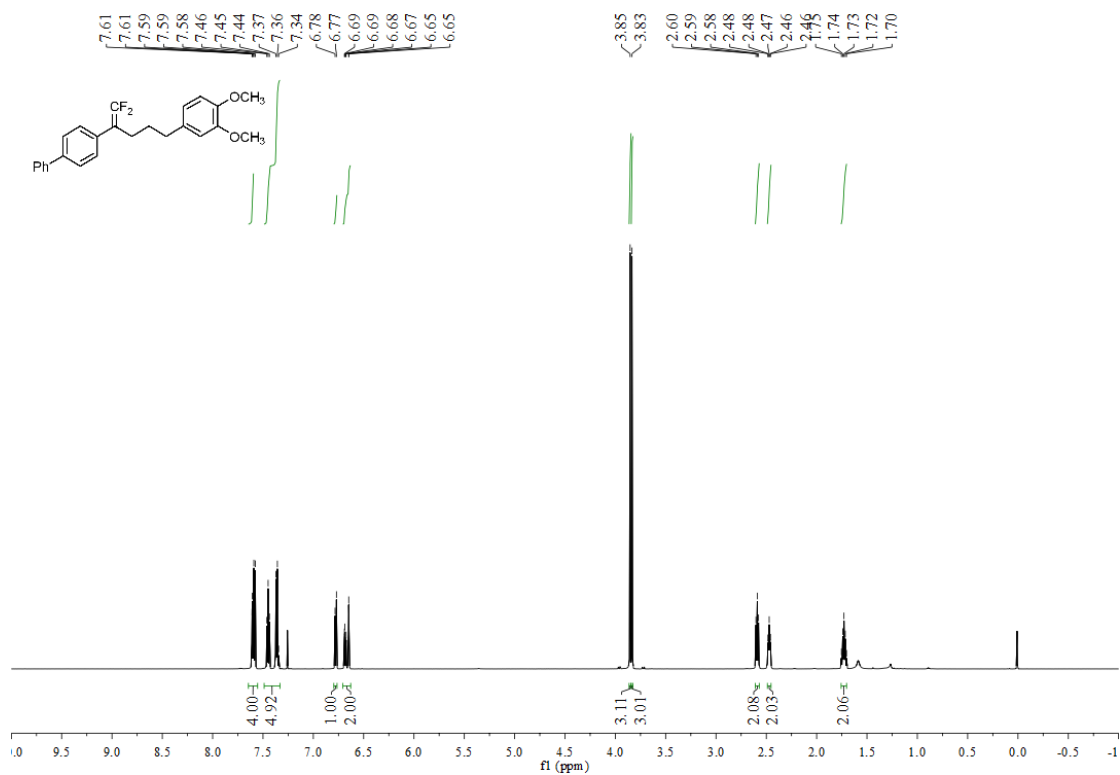

### <sup>13</sup>C NMR (151 MHz, CDCl<sub>3</sub>) spectrum of compound 9

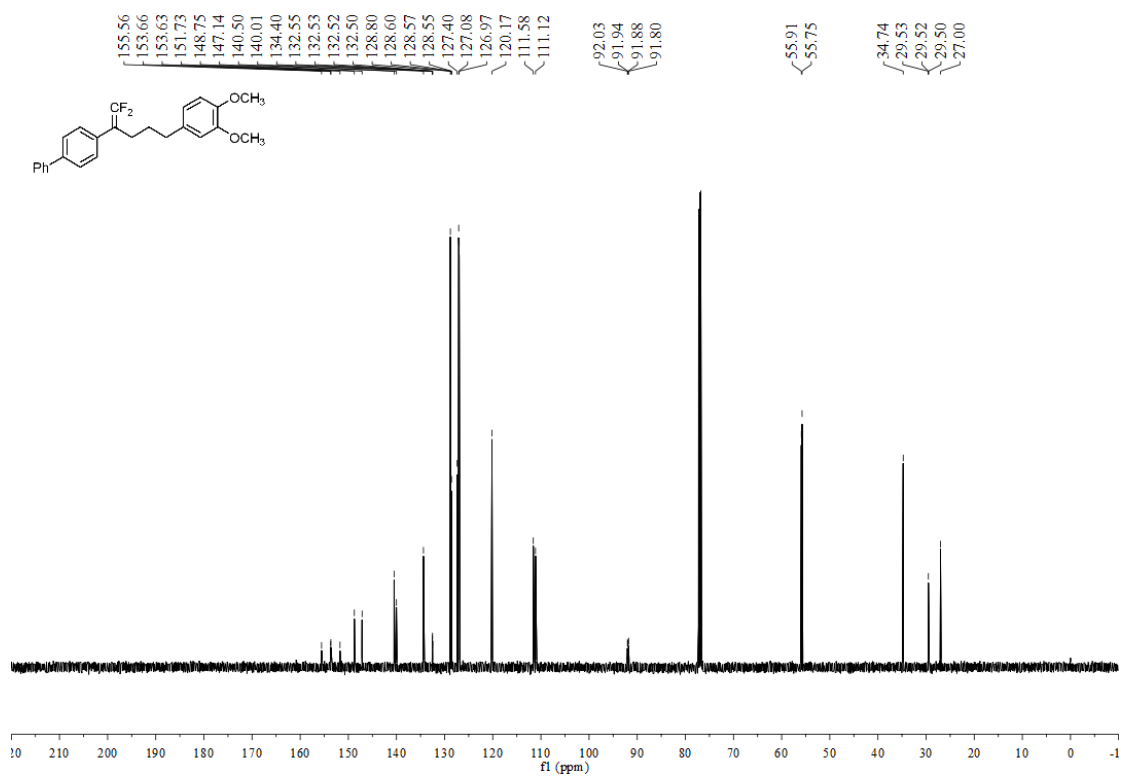

### $^{19}\text{F}$ NMR (564 MHz, $\text{CDCl}_3$ ) spectrum of compound 9

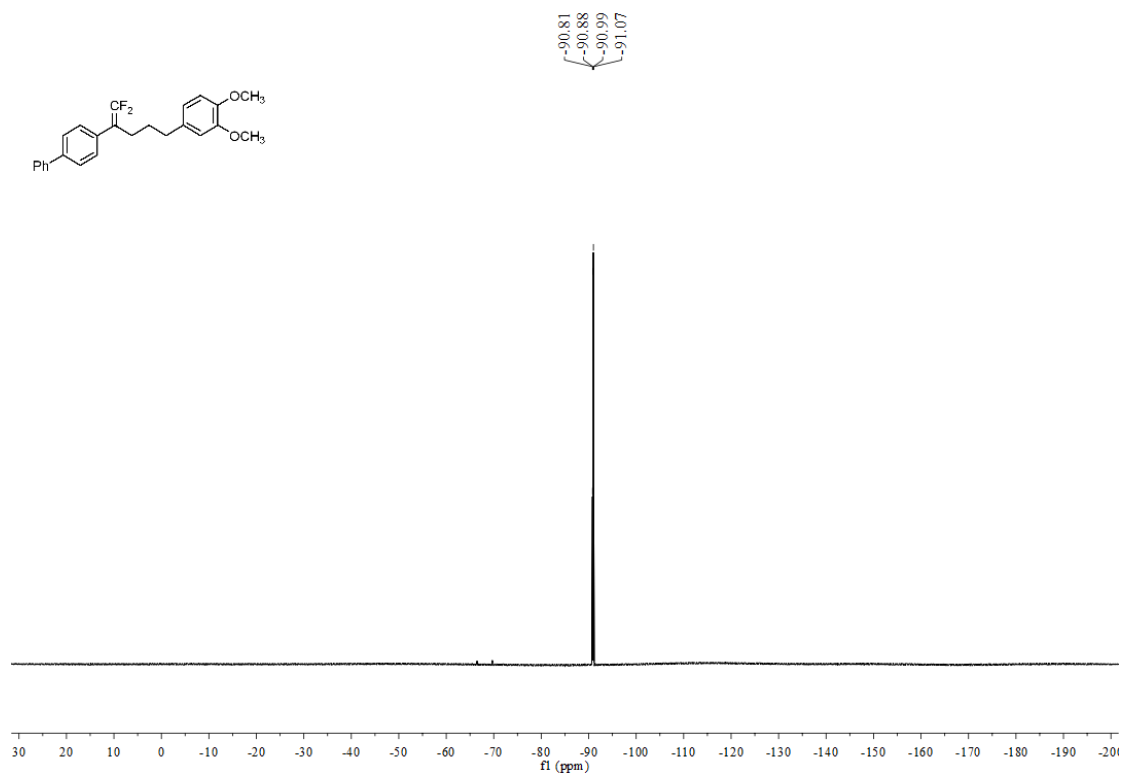

### $^1\text{H}$ NMR (600 MHz, $\text{CDCl}_3$ ) spectrum of compound 10

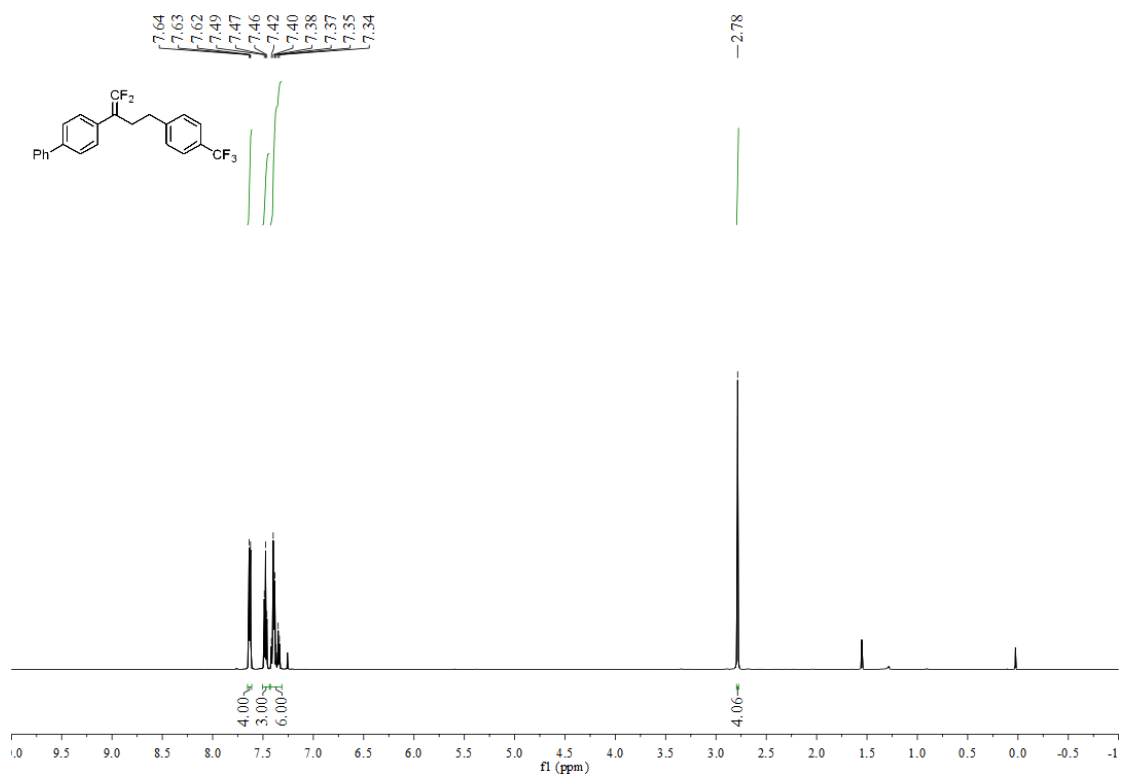

### <sup>13</sup>C NMR (151 MHz, CDCl<sub>3</sub>) spectrum of compound 10

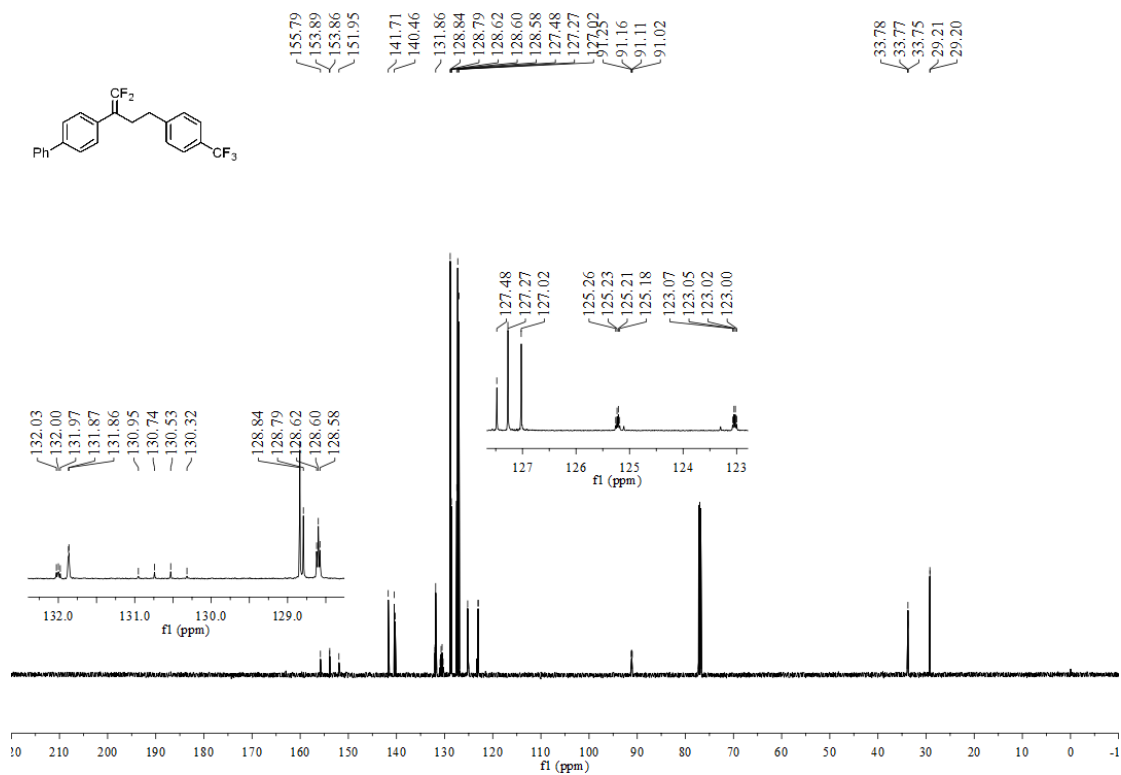

### <sup>19</sup>F NMR (564 MHz, CDCl<sub>3</sub>) spectrum of compound 10

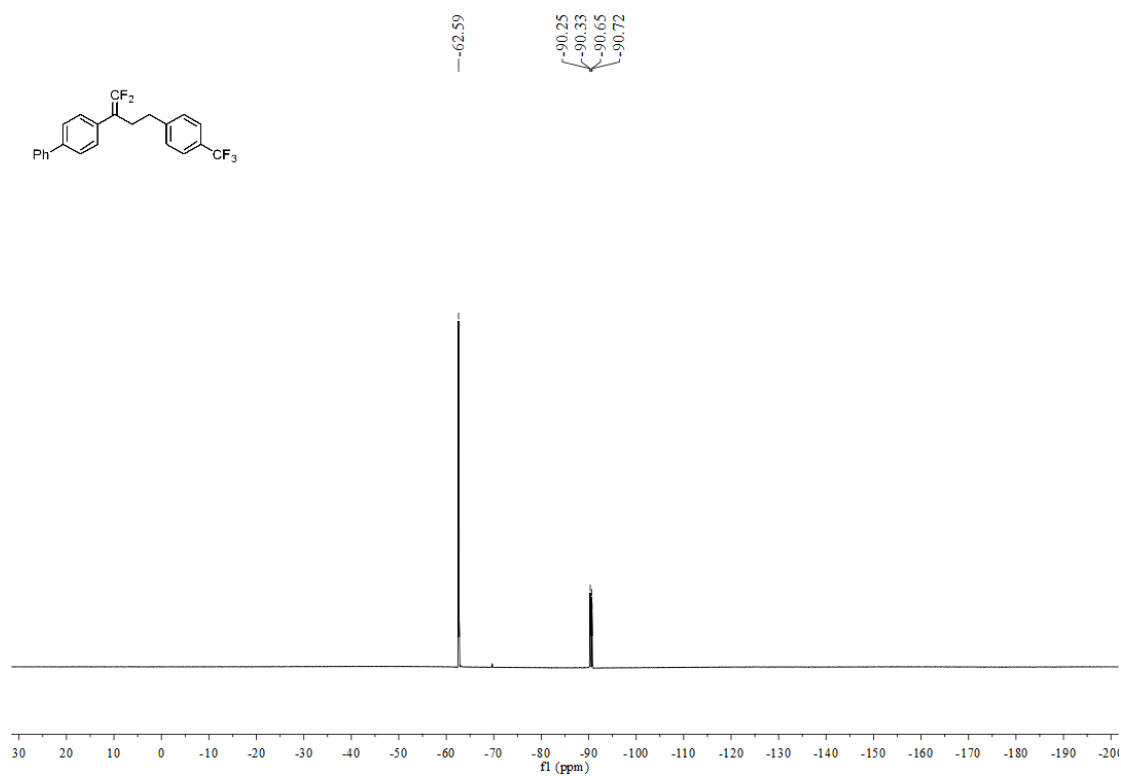

### <sup>1</sup>H NMR (600 MHz, CDCl<sub>3</sub>) spectrum of compound 11

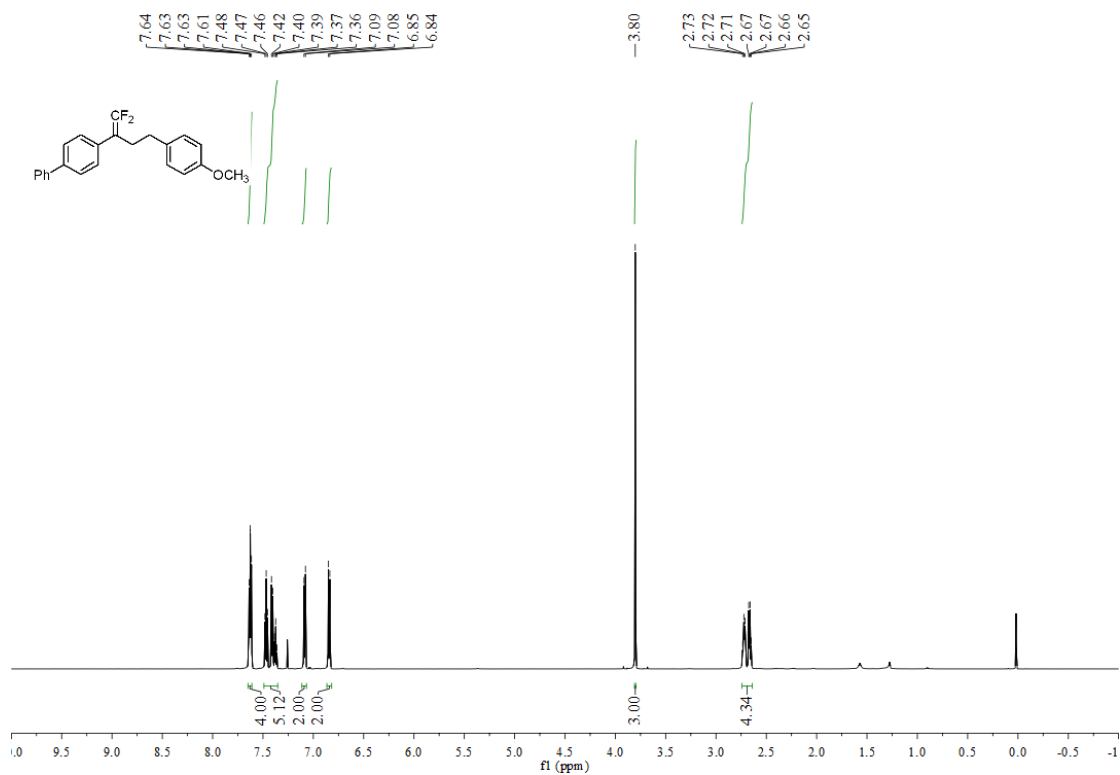

### <sup>13</sup>C NMR (151 MHz, CDCl<sub>3</sub>) spectrum of compound 11

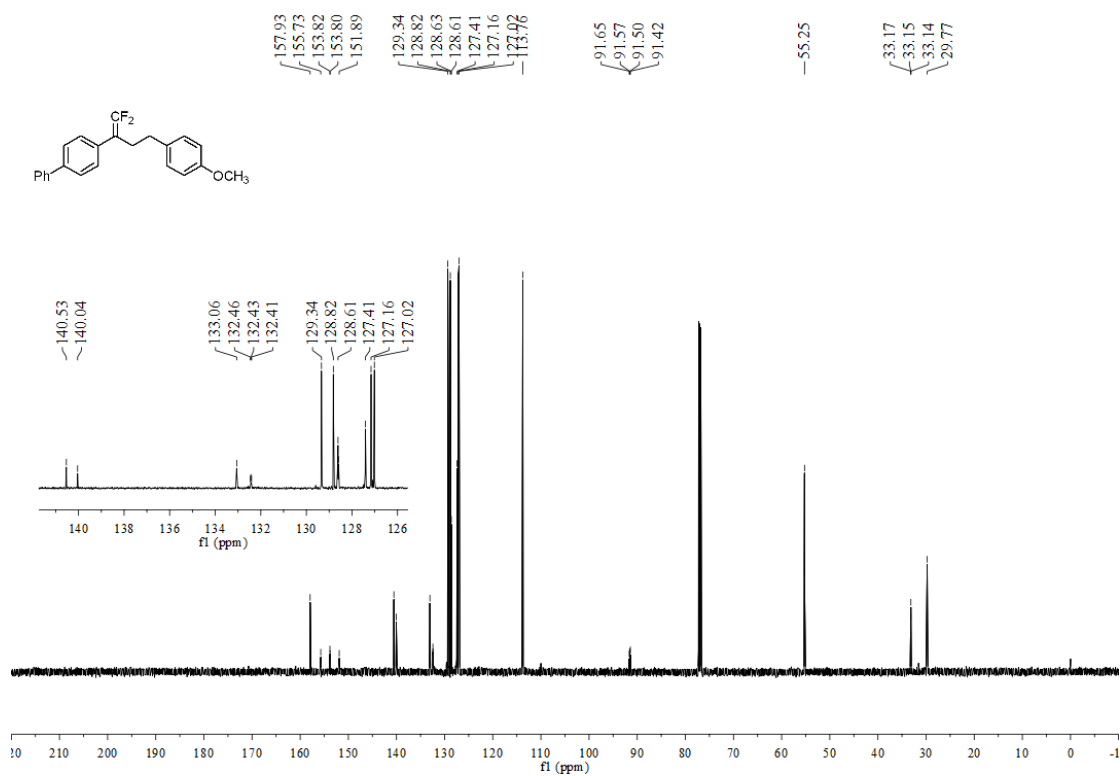

### $^{19}\text{F}$ NMR (564 MHz, $\text{CDCl}_3$ ) spectrum of compound 11

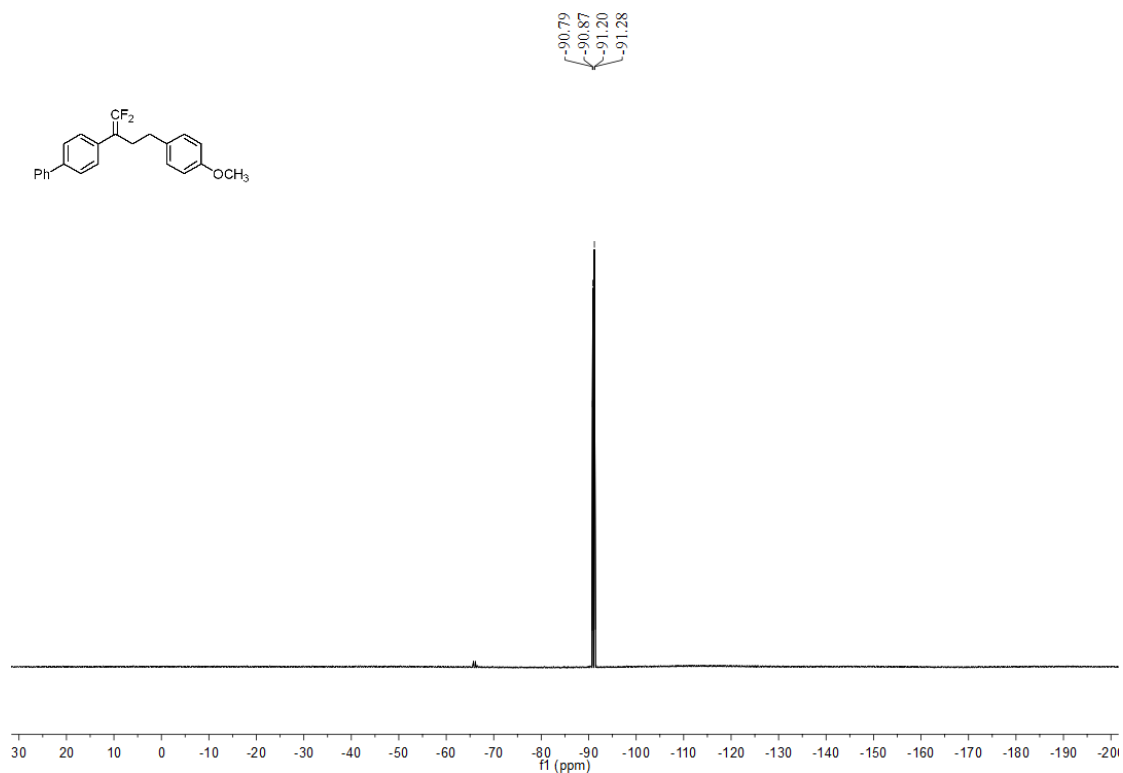

### $^1\text{H}$ NMR (600 MHz, $\text{CDCl}_3$ ) spectrum of compound 12

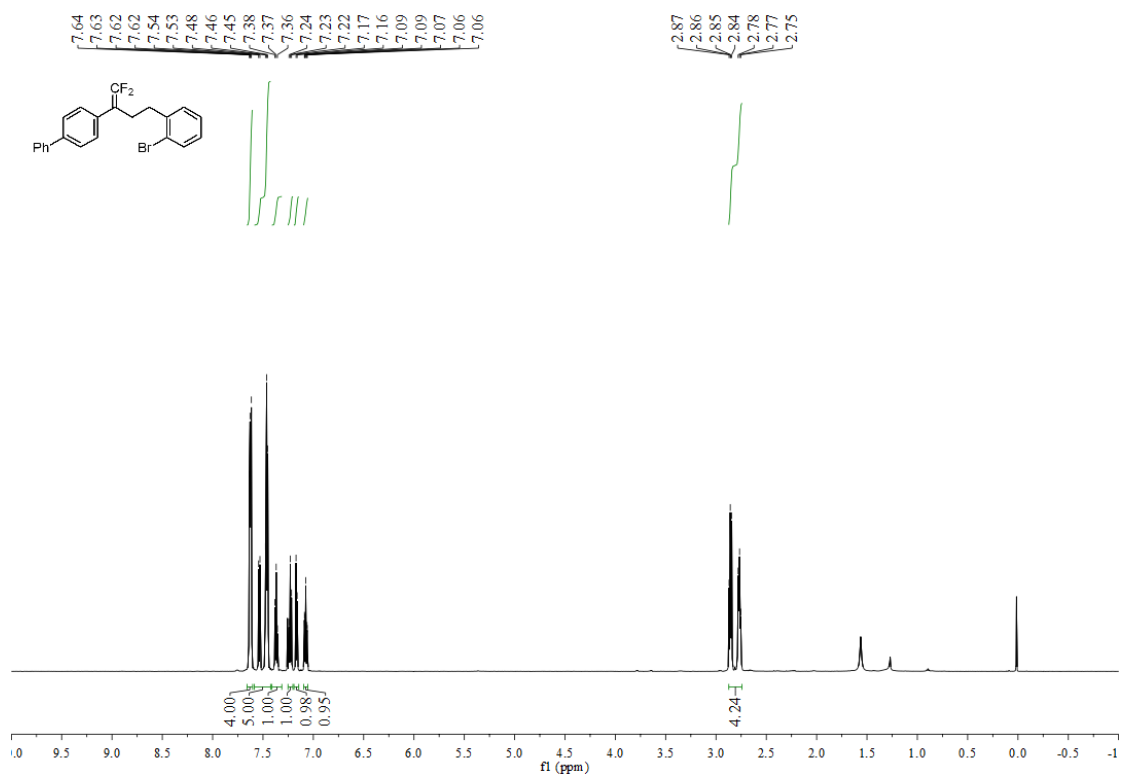

### <sup>13</sup>C NMR (151 MHz, CDCl<sub>3</sub>) spectrum of compound 12

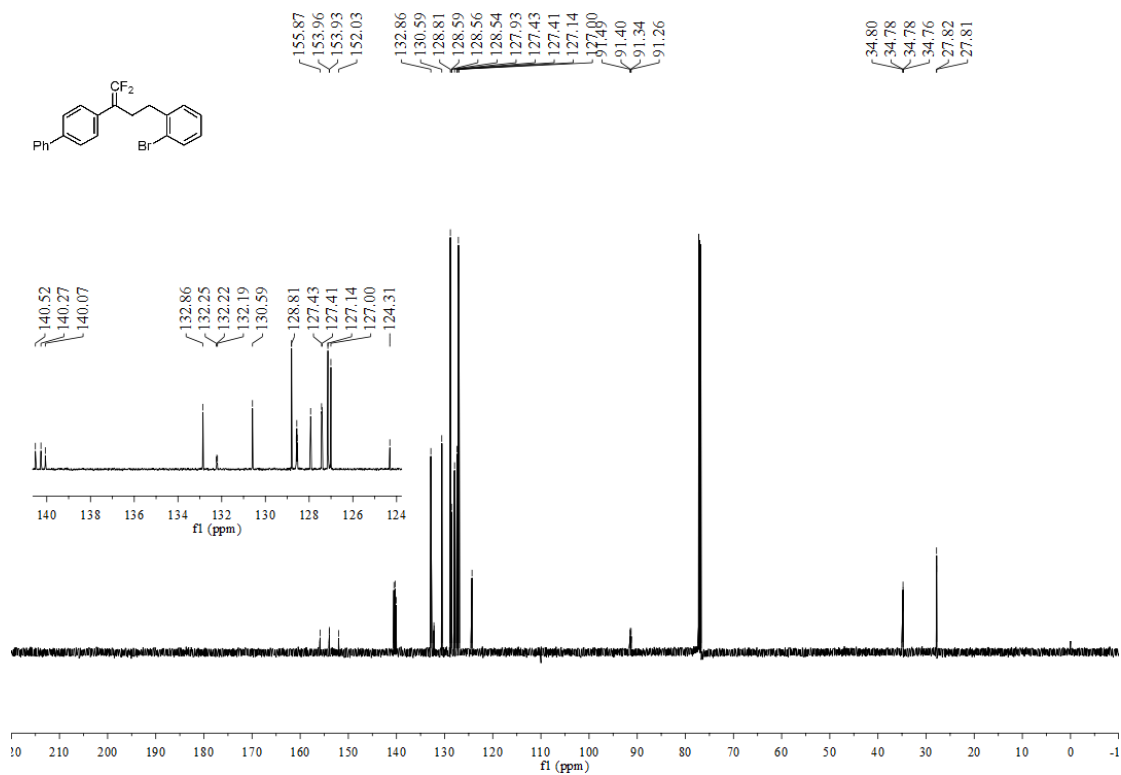

### <sup>19</sup>F NMR (564 MHz, CDCl<sub>3</sub>) spectrum of compound 12

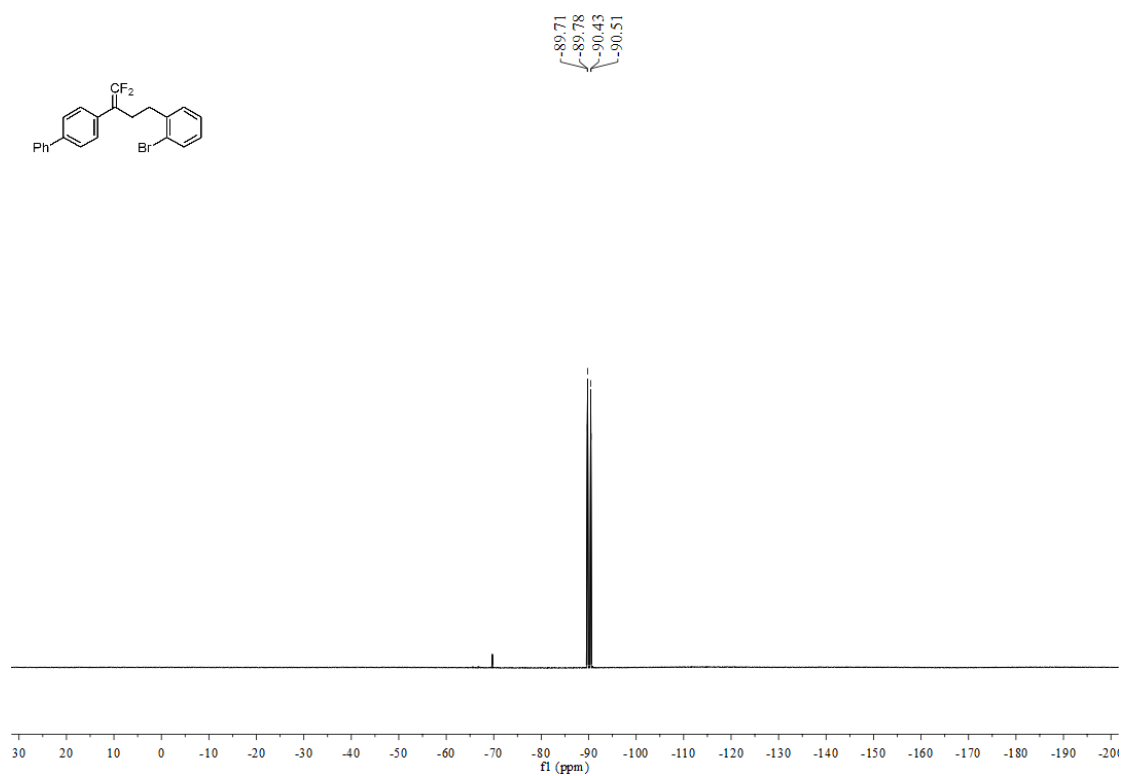

### <sup>1</sup>H NMR (600 MHz, CDCl<sub>3</sub>) spectrum of compound 13

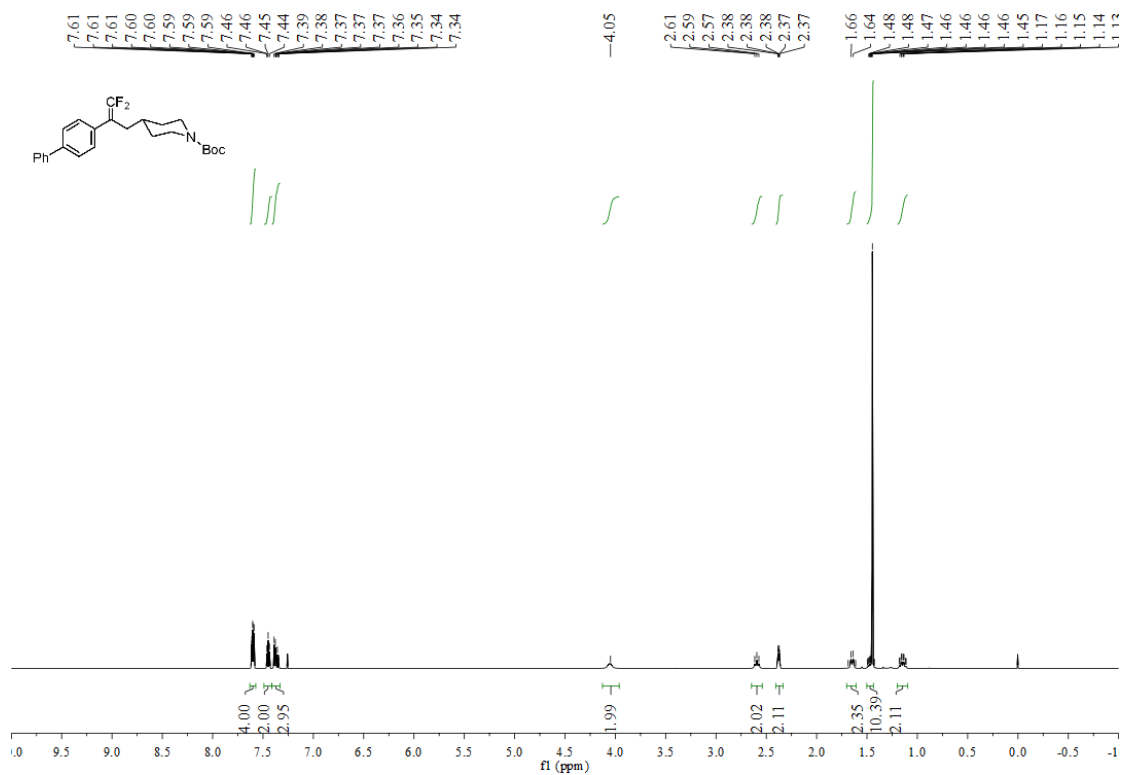

### <sup>13</sup>C NMR (151 MHz, CDCl<sub>3</sub>) spectrum of compound 13

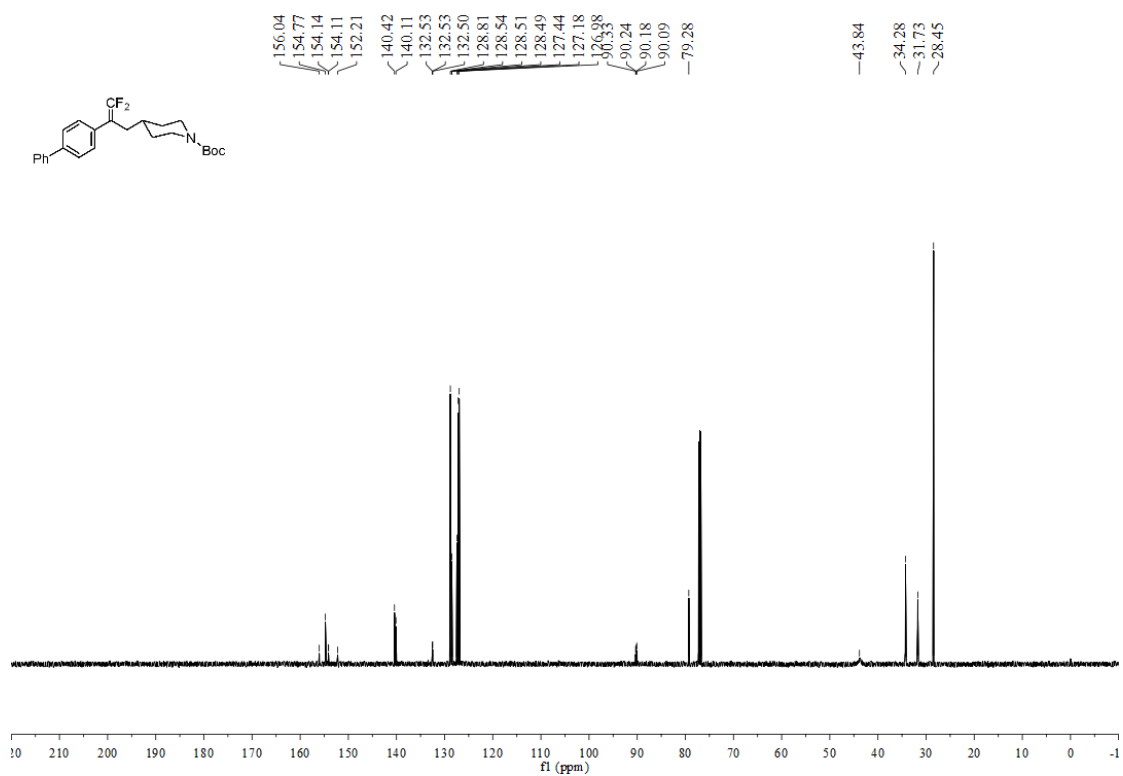

### $^{19}\text{F}$ NMR (564 MHz, $\text{CDCl}_3$ ) spectrum of compound 13

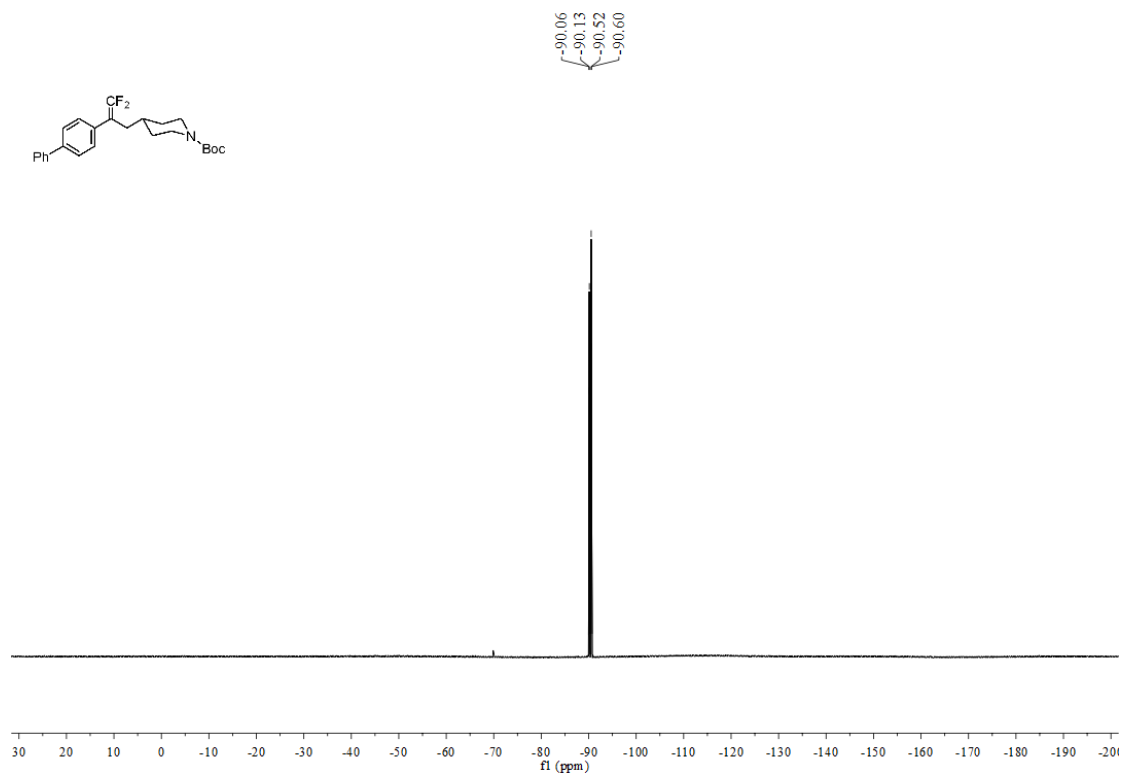

### $^1\text{H}$ NMR (600 MHz, $\text{CDCl}_3$ ) spectrum of compound 14

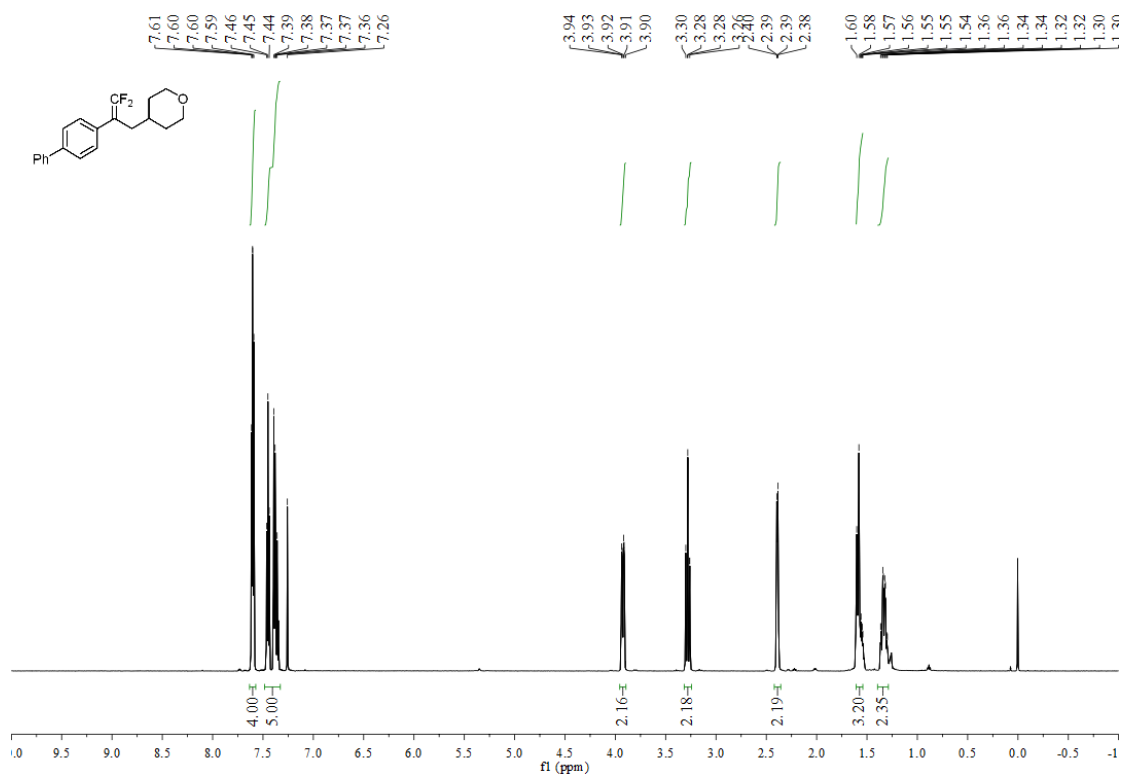



### <sup>13</sup>C NMR (151 MHz, CDCl<sub>3</sub>) spectrum of compound 14

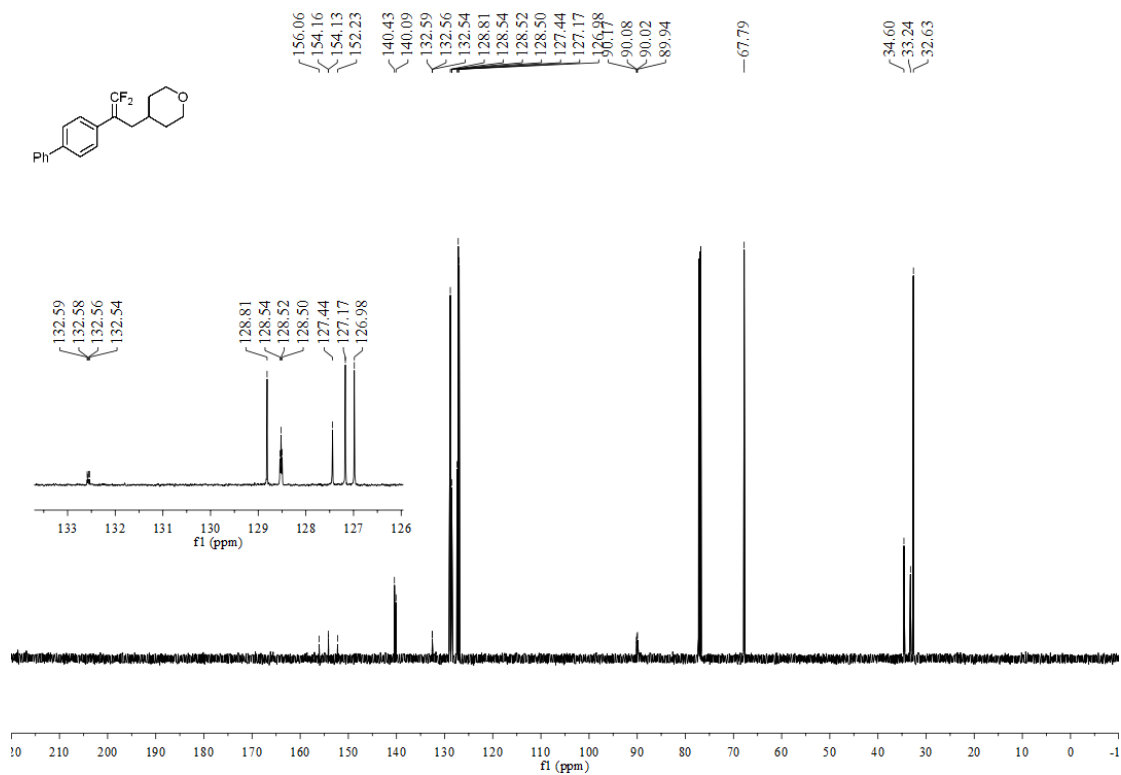

### <sup>19</sup>F NMR (564 MHz, CDCl<sub>3</sub>) spectrum of compound 14

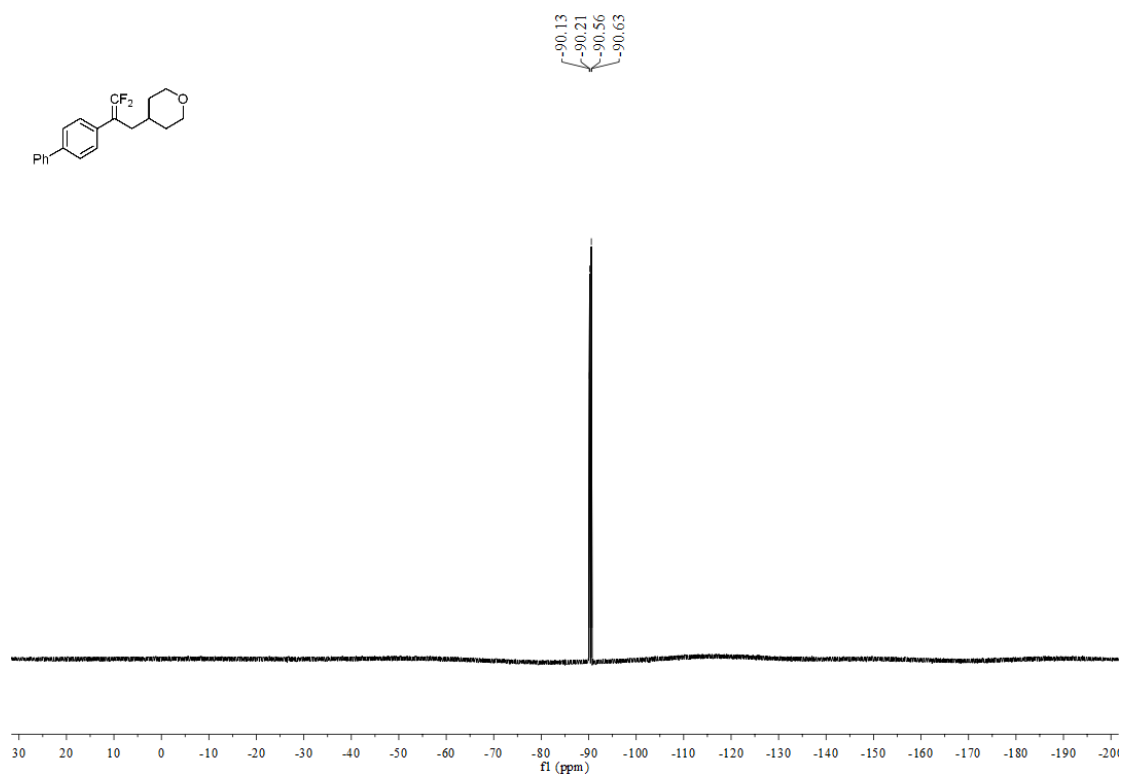

### <sup>1</sup>H NMR (600 MHz, CDCl<sub>3</sub>) spectrum of compound 15

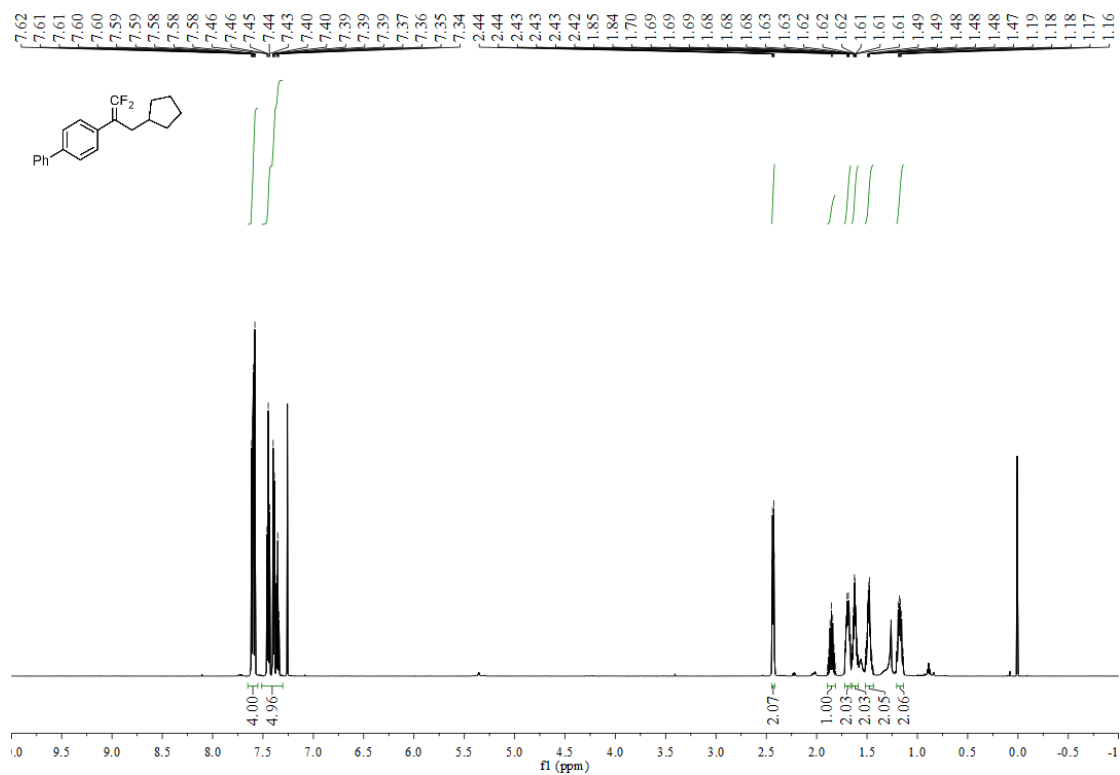

### <sup>13</sup>C NMR (151 MHz, CDCl<sub>3</sub>) spectrum of compound 15

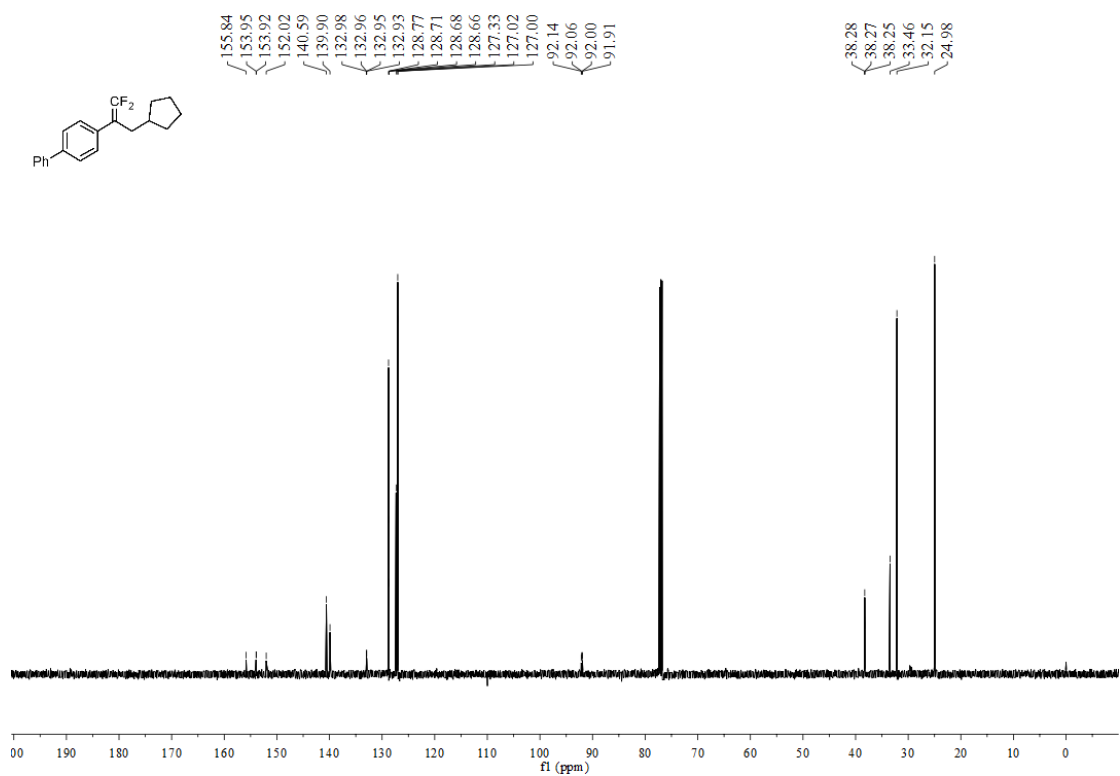

### $^{19}\text{F}$ NMR (564 MHz, $\text{CDCl}_3$ ) spectrum of compound 15

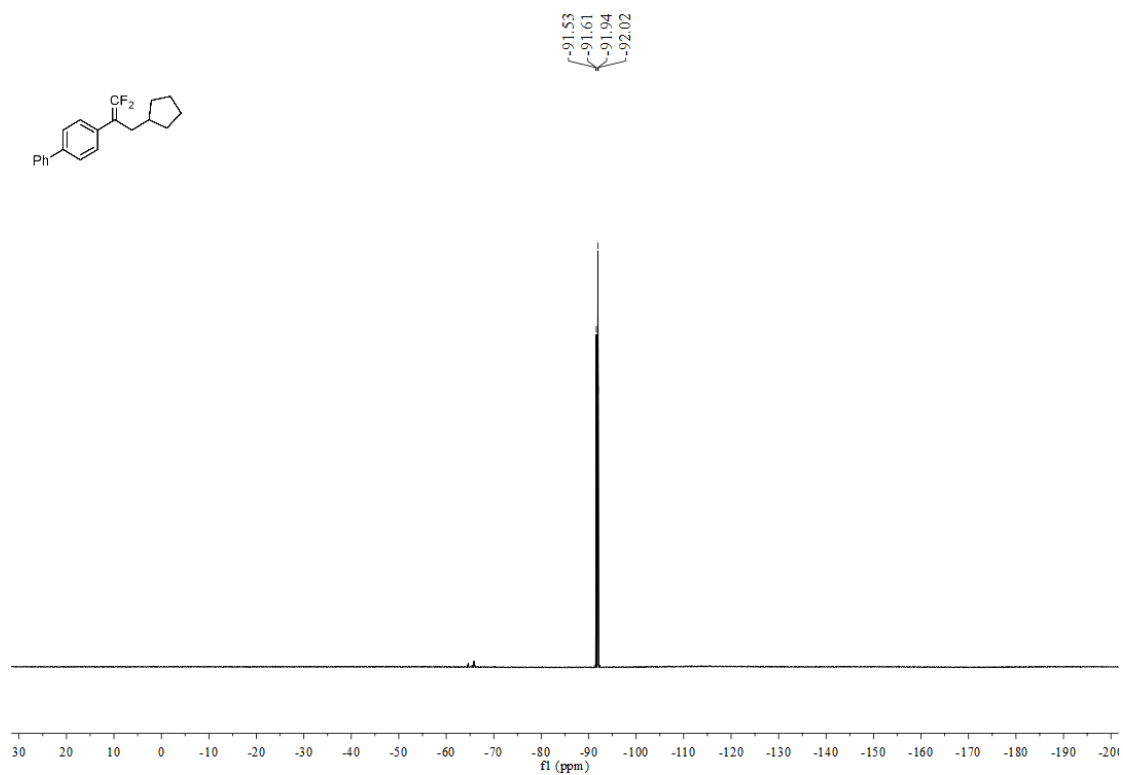

### $^1\text{H}$ NMR (600 MHz, $\text{CDCl}_3$ ) spectrum of compound 16

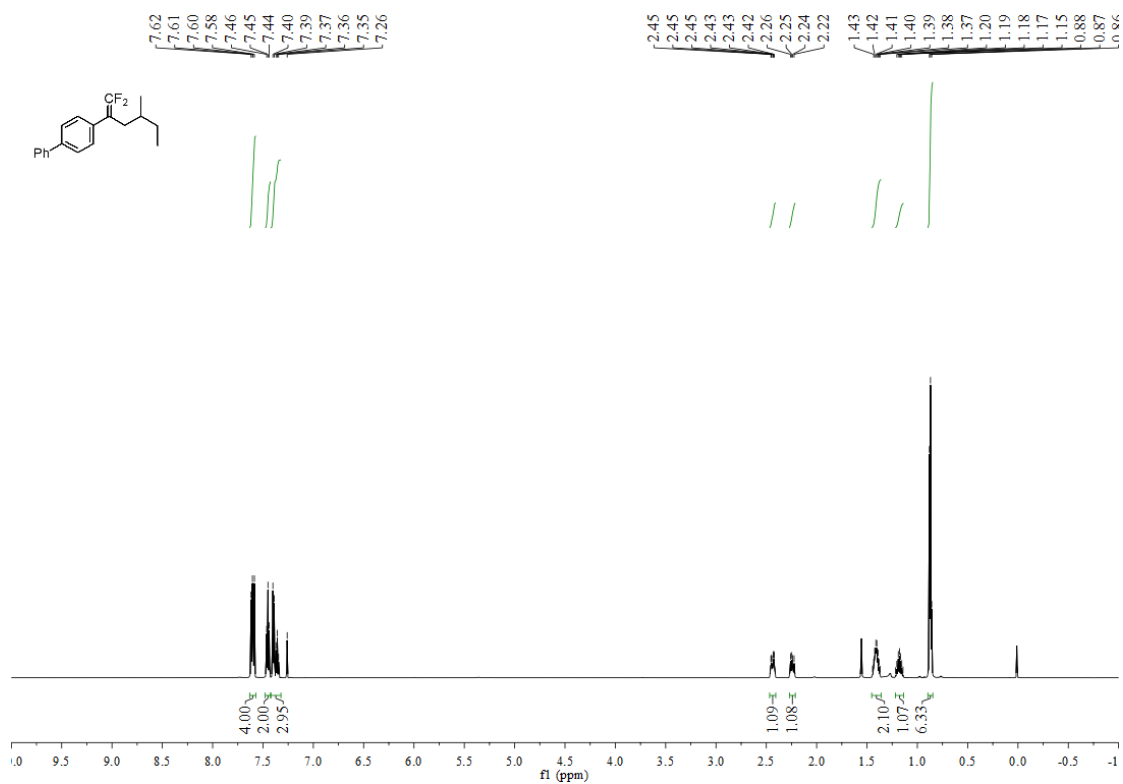

### $^{13}\text{C}$ NMR (151 MHz, $\text{CDCl}_3$ ) spectrum of compound 16

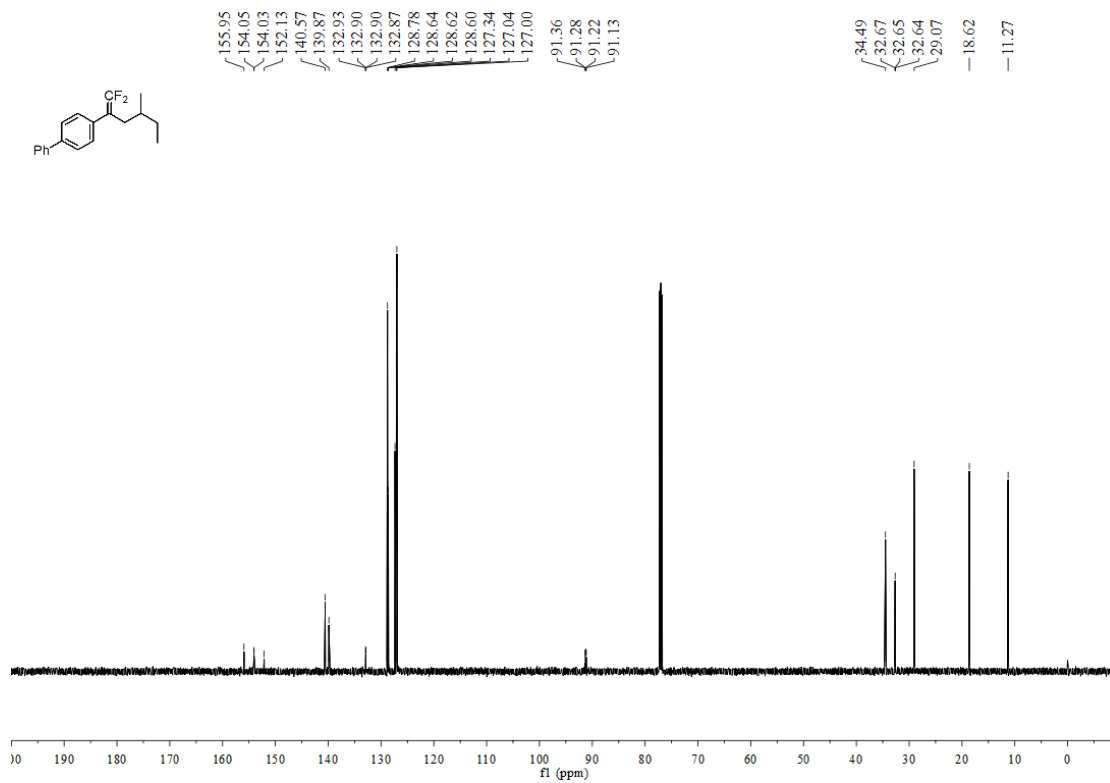

### $^{19}\text{F}$ NMR (564 MHz, $\text{CDCl}_3$ ) spectrum of compound 16

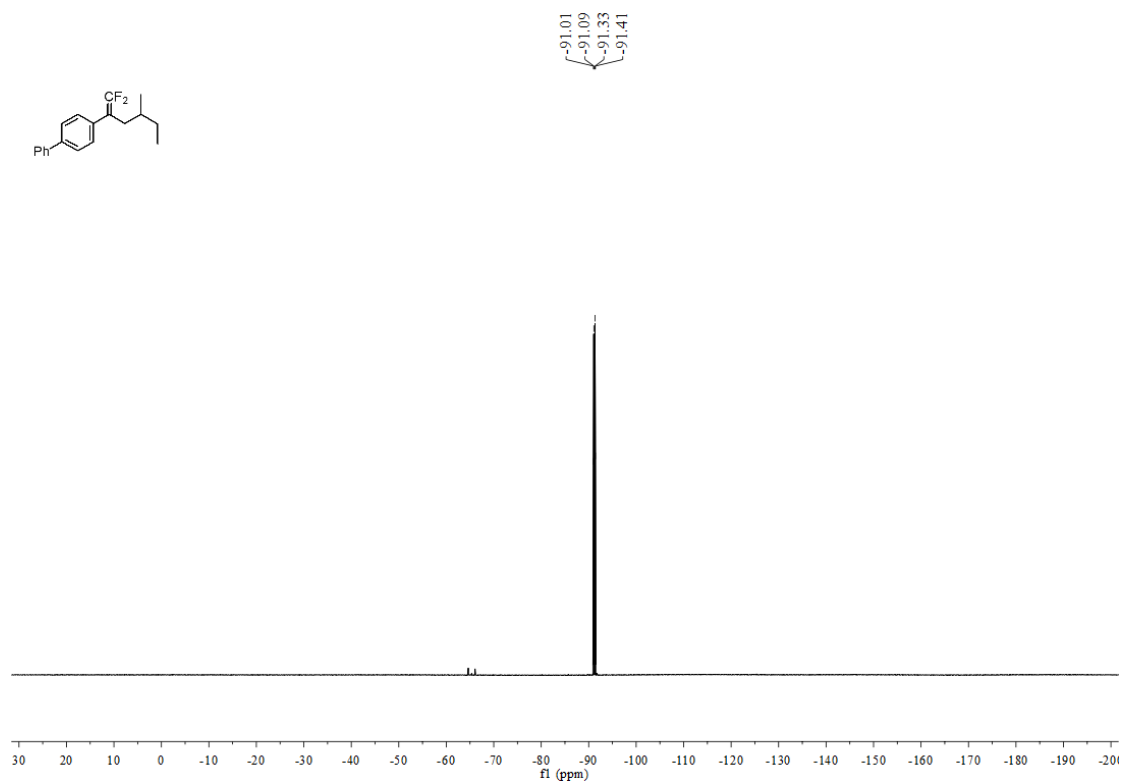

### <sup>1</sup>H NMR (600 MHz, CDCl<sub>3</sub>) spectrum of compound 17

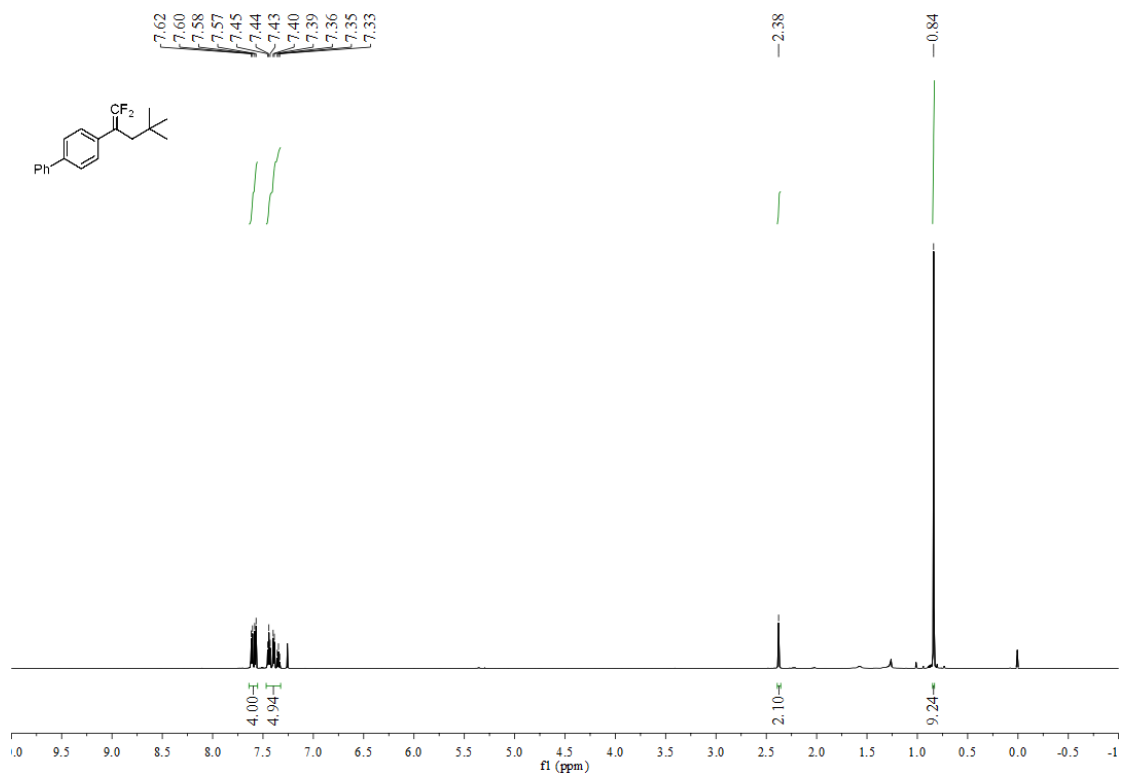

### <sup>13</sup>C NMR (151 MHz, CDCl<sub>3</sub>) spectrum of compound 17

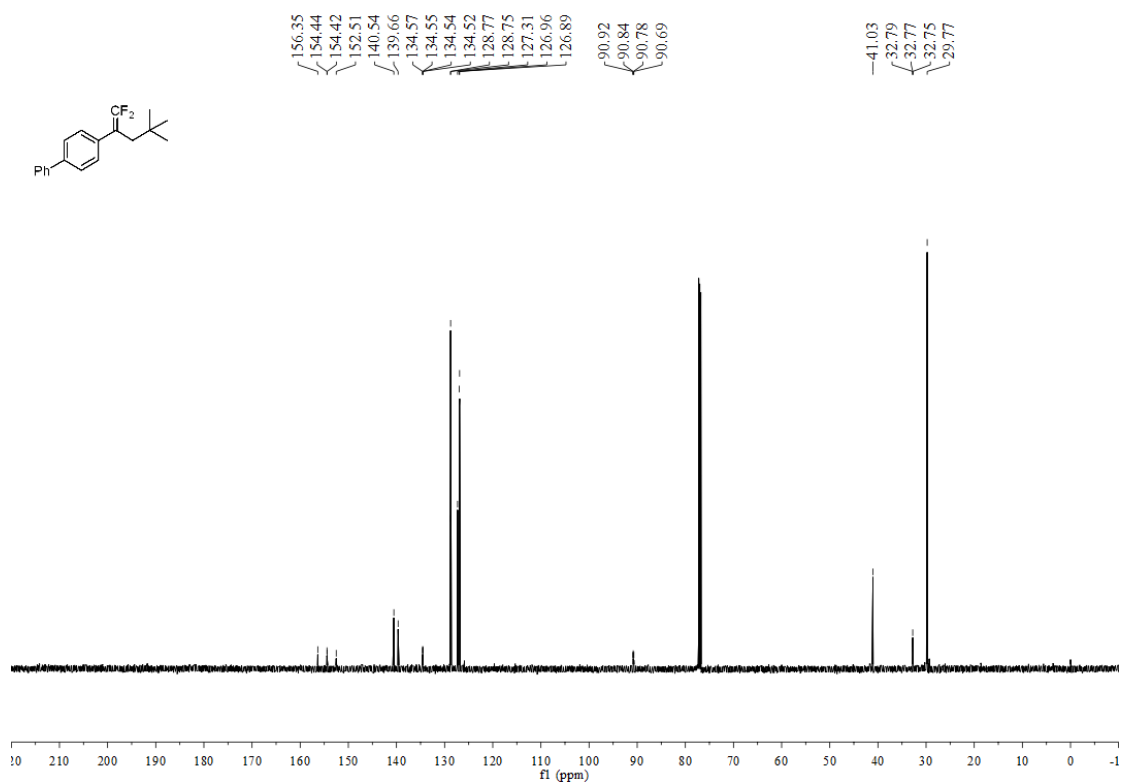

### $^{19}\text{F}$ NMR (564 MHz, $\text{CDCl}_3$ ) spectrum of compound 17

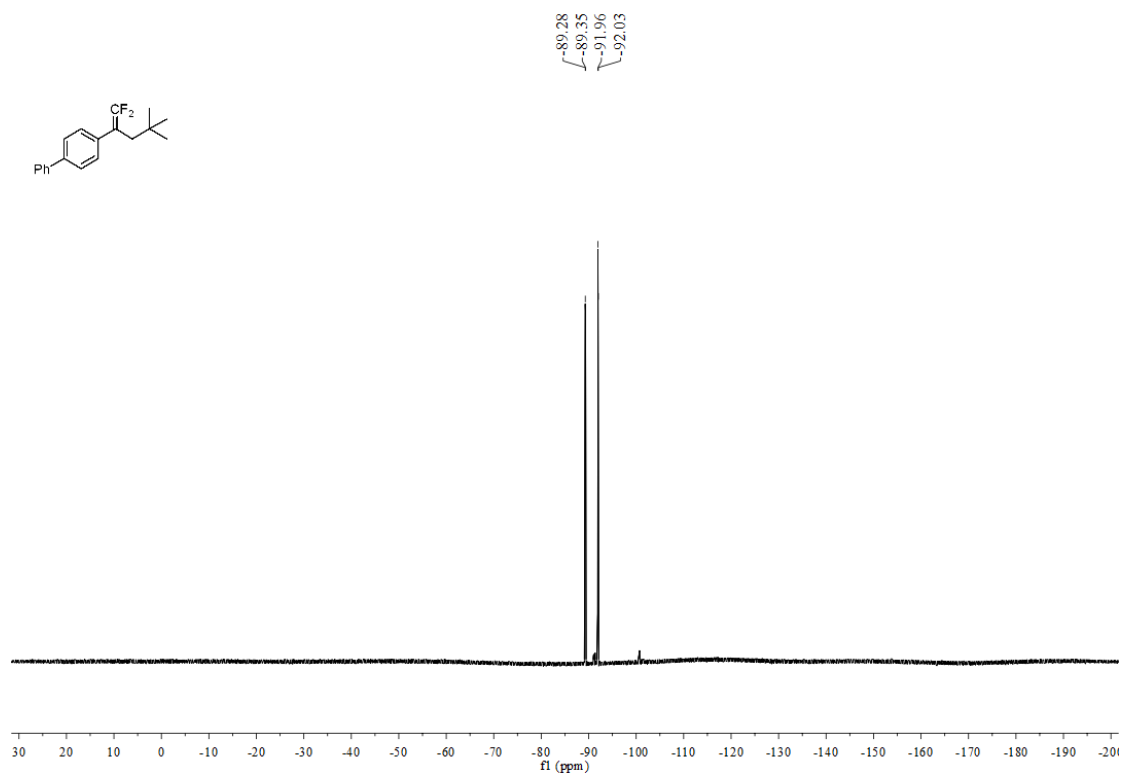

### $^1\text{H}$ NMR (600 MHz, $\text{CDCl}_3$ ) spectrum of compound 18

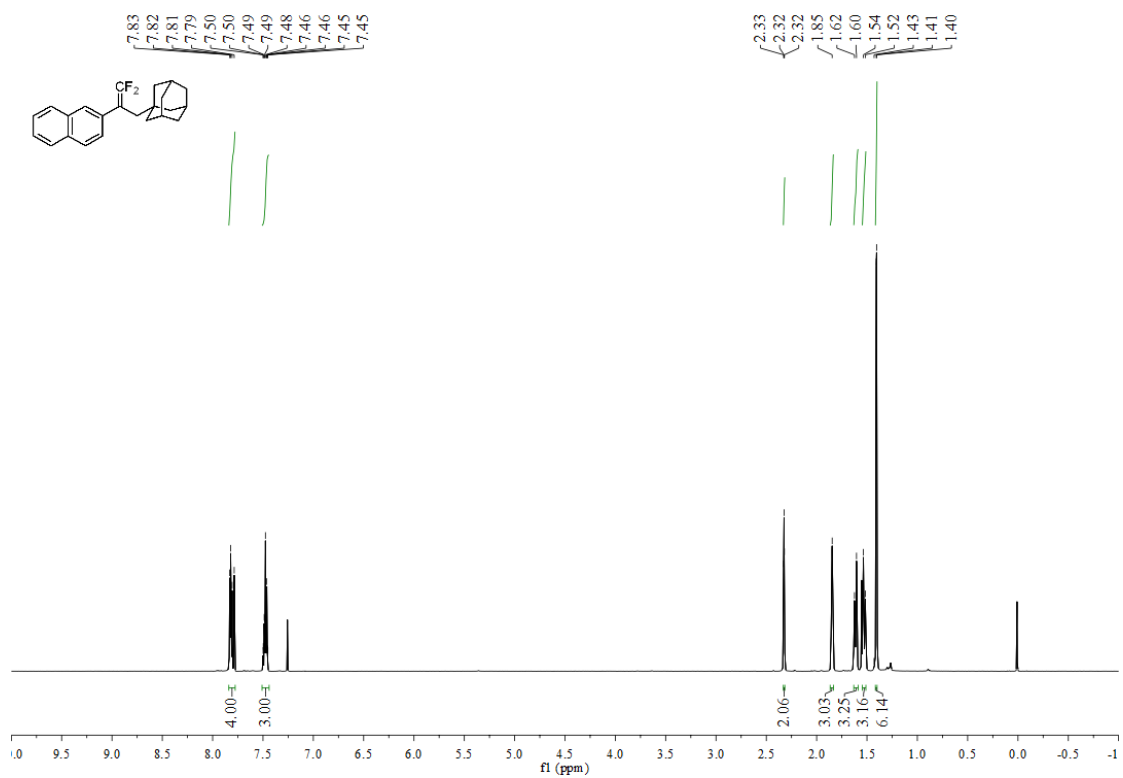

### <sup>13</sup>C NMR (151 MHz, CDCl<sub>3</sub>) spectrum of compound 18

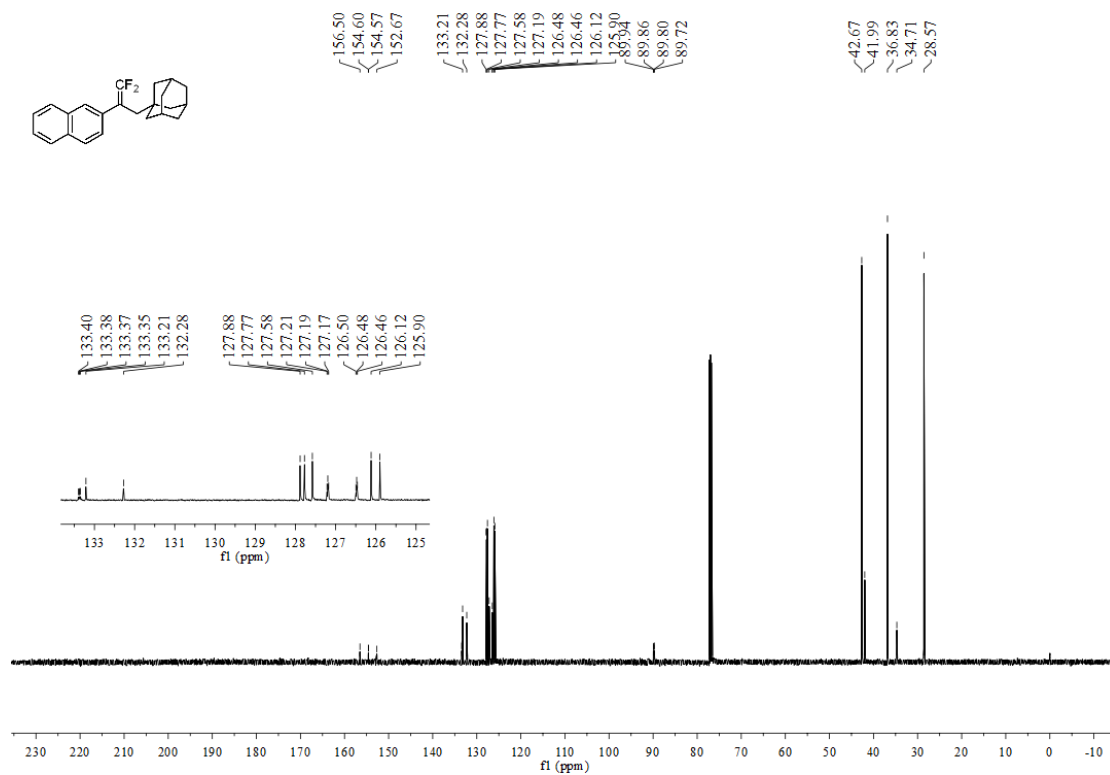

### <sup>19</sup>F NMR (564 MHz, CDCl<sub>3</sub>) spectrum of compound 18

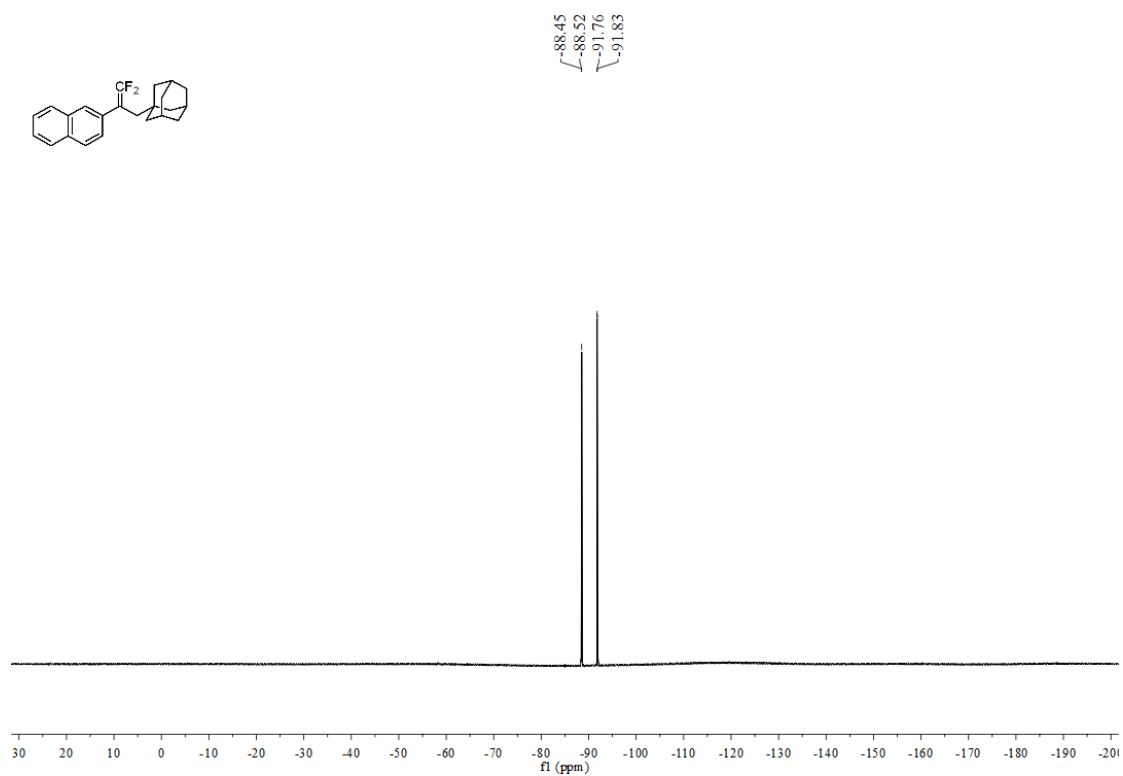

### <sup>1</sup>H NMR (600 MHz, CDCl<sub>3</sub>) spectrum of compound 19

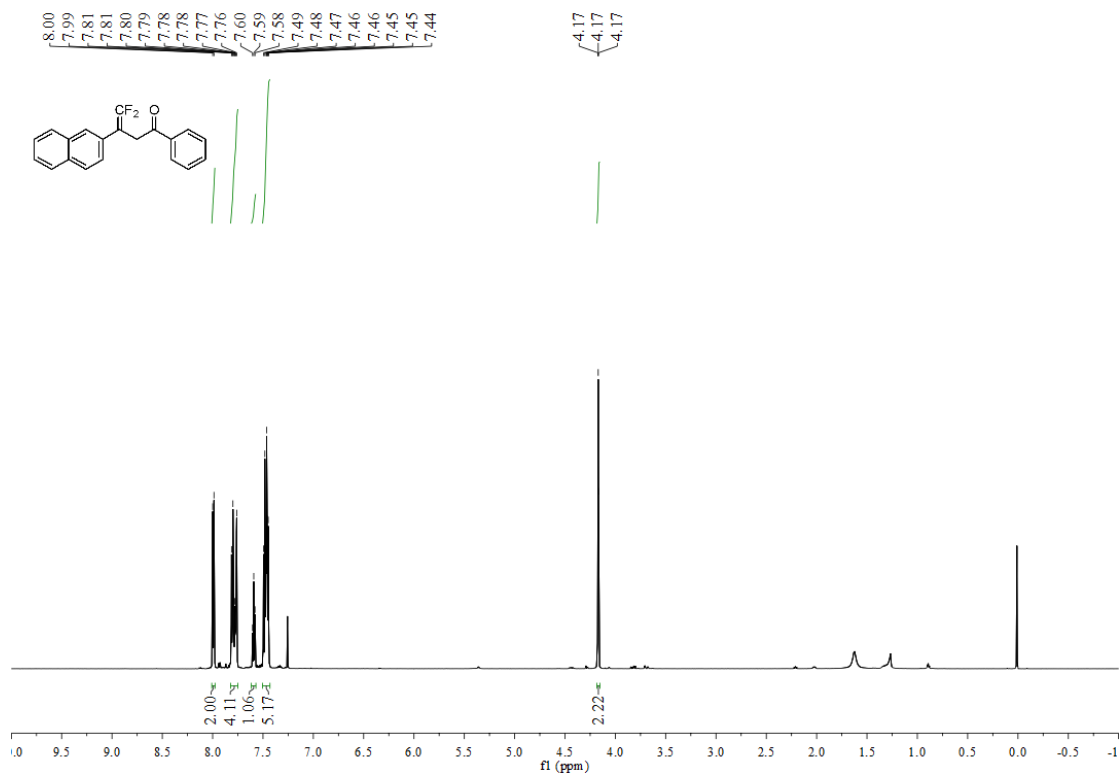

### <sup>13</sup>C NMR (151 MHz, CDCl<sub>3</sub>) spectrum of compound 19

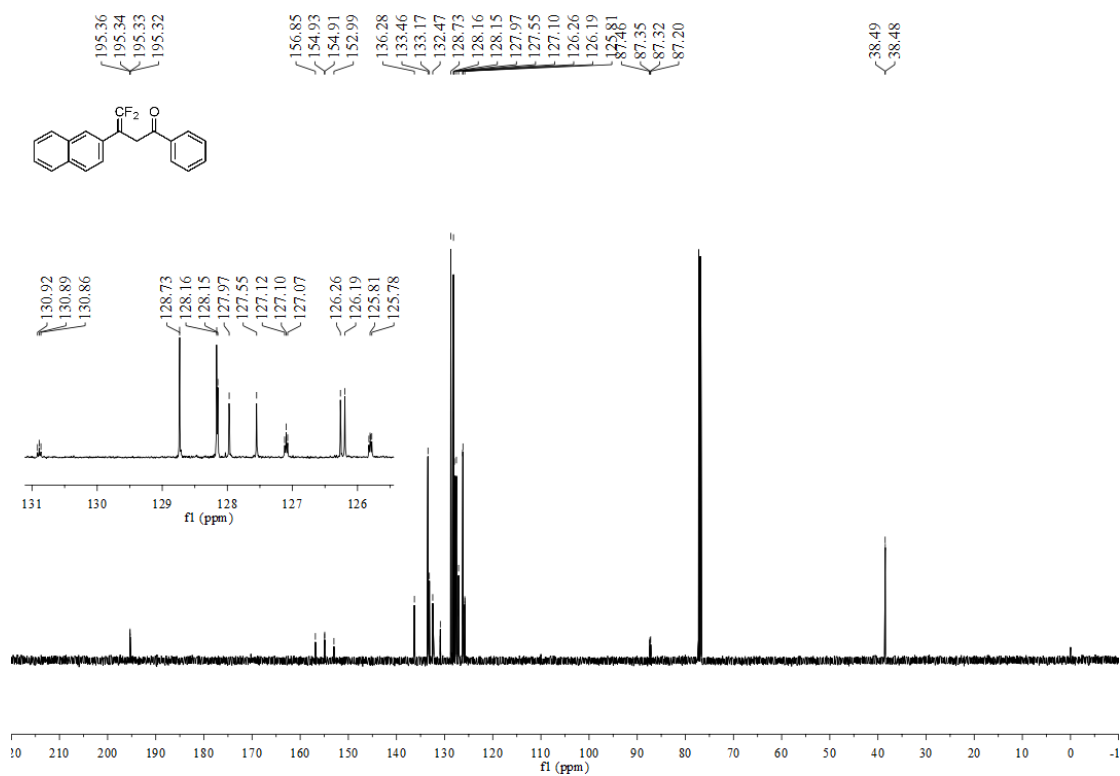



### $^{19}\text{F}$ NMR (564 MHz, $\text{CDCl}_3$ ) spectrum of compound 19

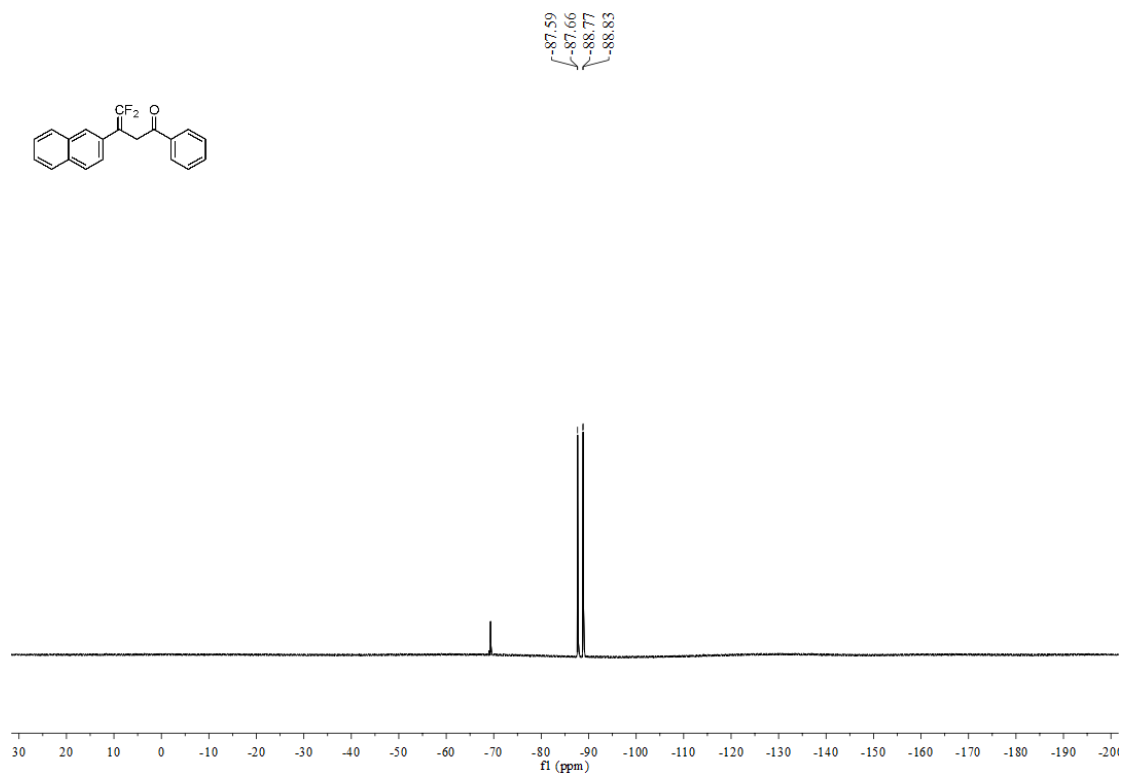

### $^1\text{H}$ NMR (600 MHz, $\text{CDCl}_3$ ) spectrum of compound 20

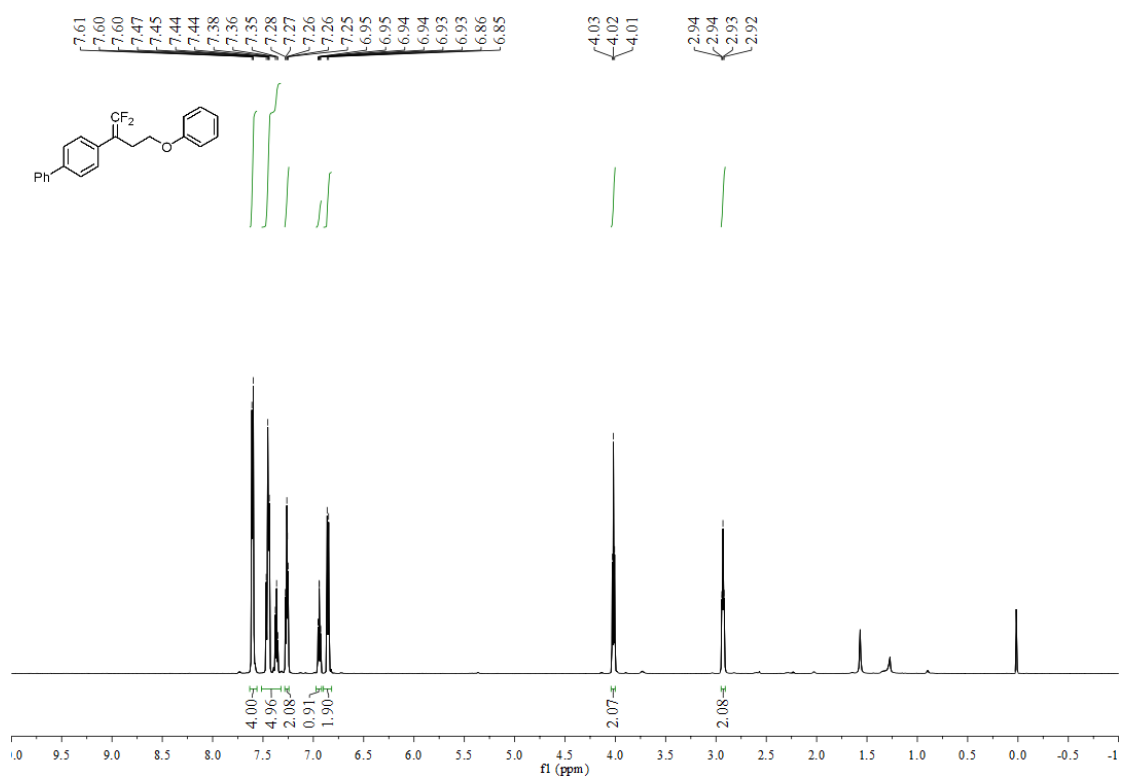

### <sup>13</sup>C NMR (151 MHz, CDCl<sub>3</sub>) spectrum of compound 20

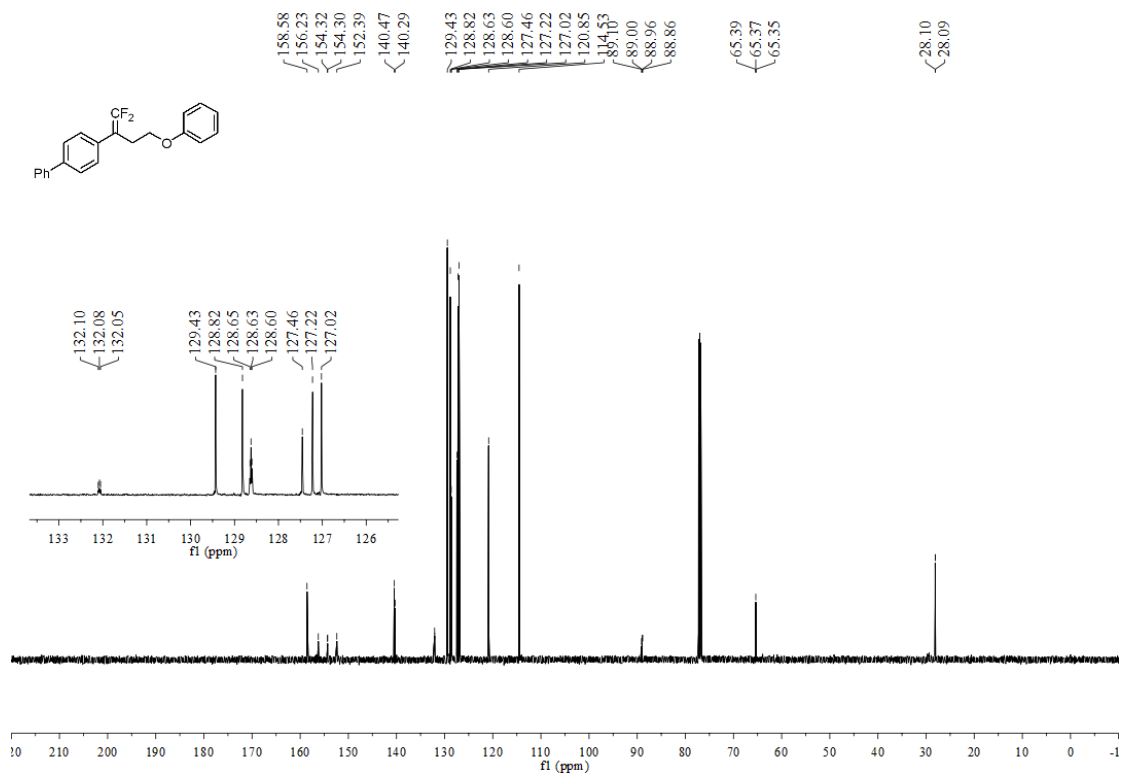

### <sup>19</sup>F NMR (564 MHz, CDCl<sub>3</sub>) spectrum of compound 20

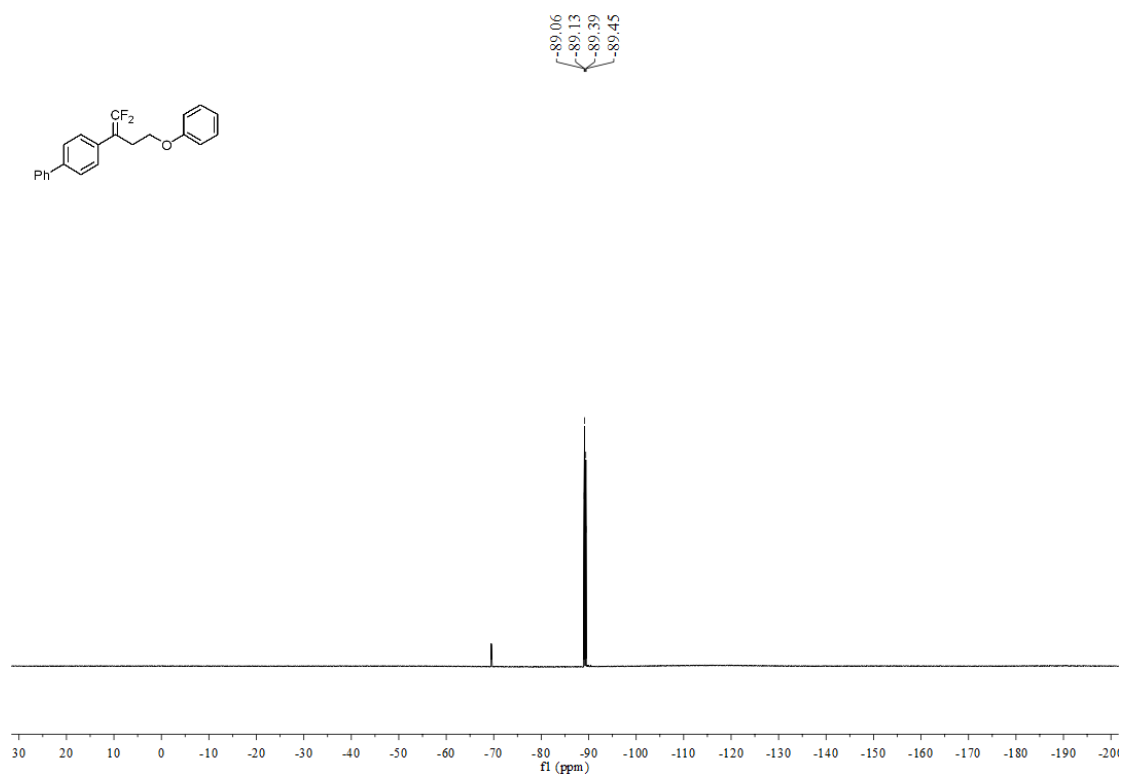

**<sup>1</sup>H NMR (600 MHz, CDCl<sub>3</sub>) spectrum of compound 21**

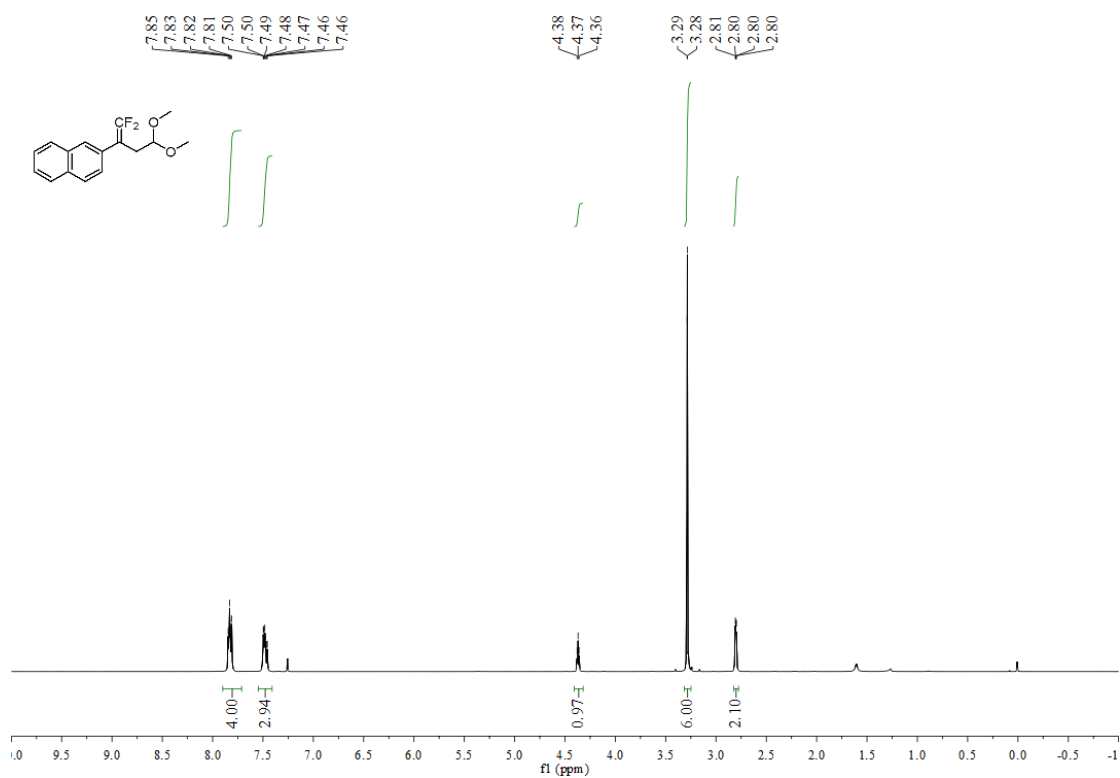

**<sup>13</sup>C NMR (151 MHz, CDCl<sub>3</sub>) spectrum of compound 21**

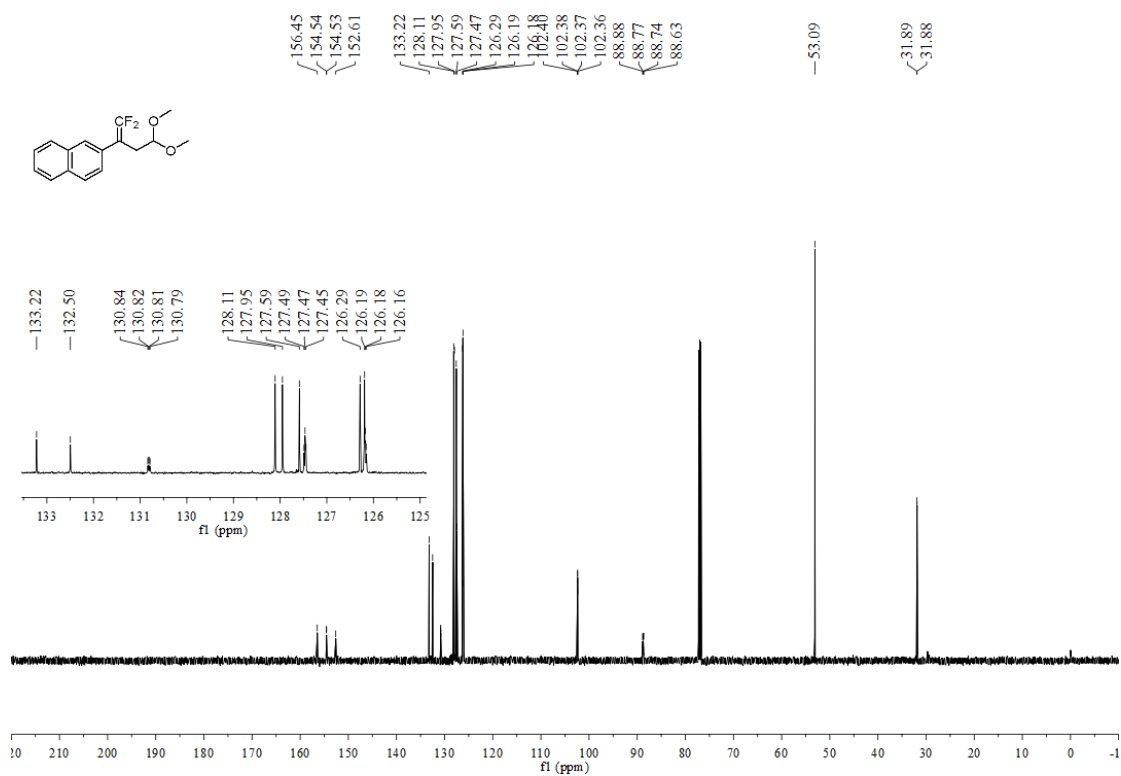

### <sup>19</sup>F NMR (564 MHz, CDCl<sub>3</sub>) spectrum of compound 21

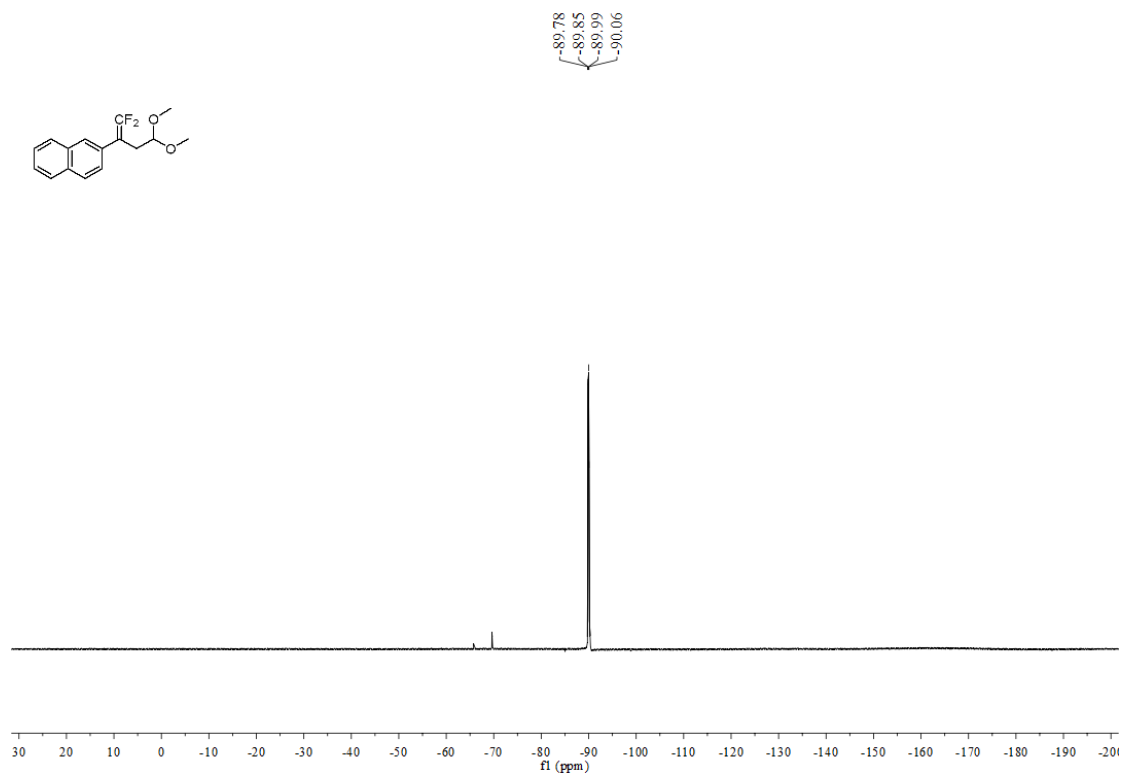

### <sup>1</sup>H NMR (600 MHz, CDCl<sub>3</sub>) spectrum of compound 22

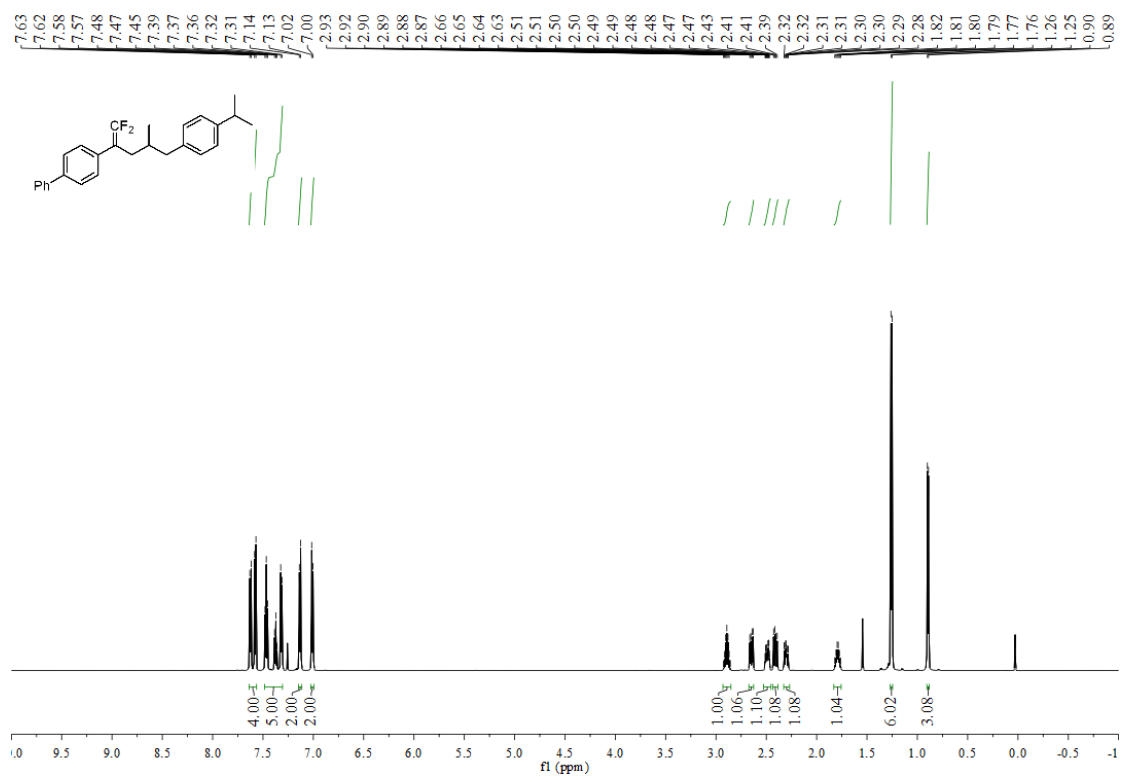

### <sup>13</sup>C NMR (151 MHz, CDCl<sub>3</sub>) spectrum of compound 22

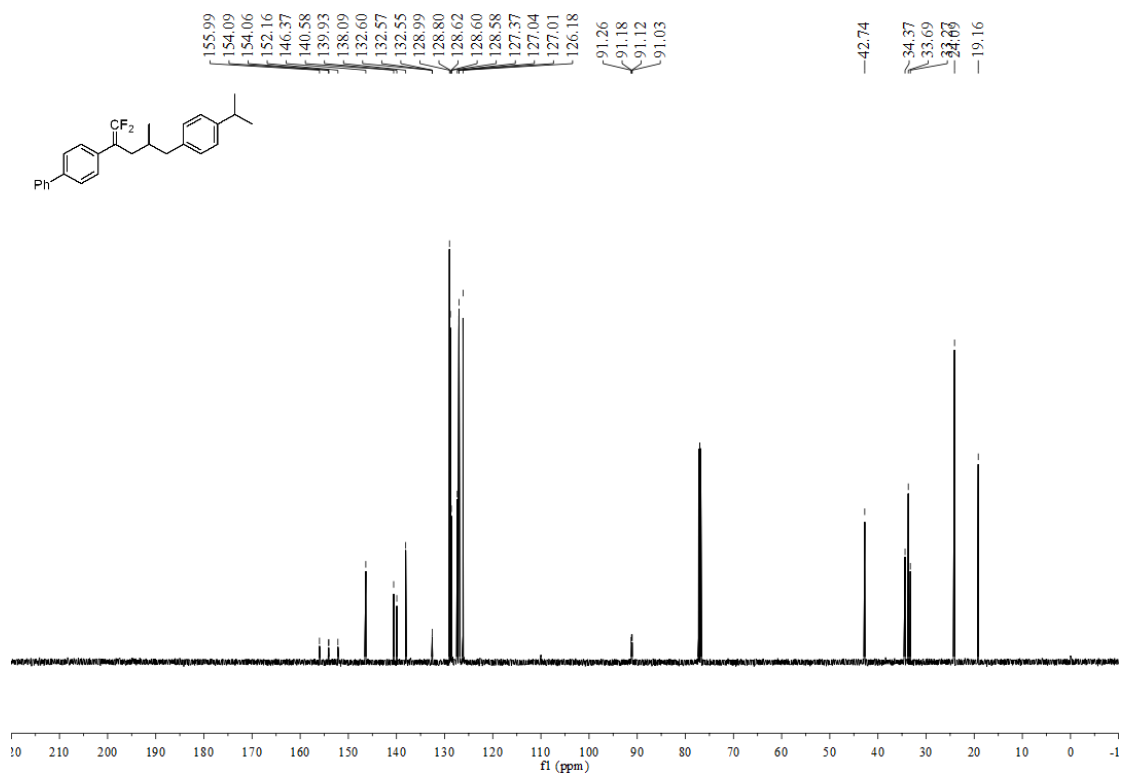

### <sup>19</sup>F NMR (564 MHz, CDCl<sub>3</sub>) spectrum of compound 22

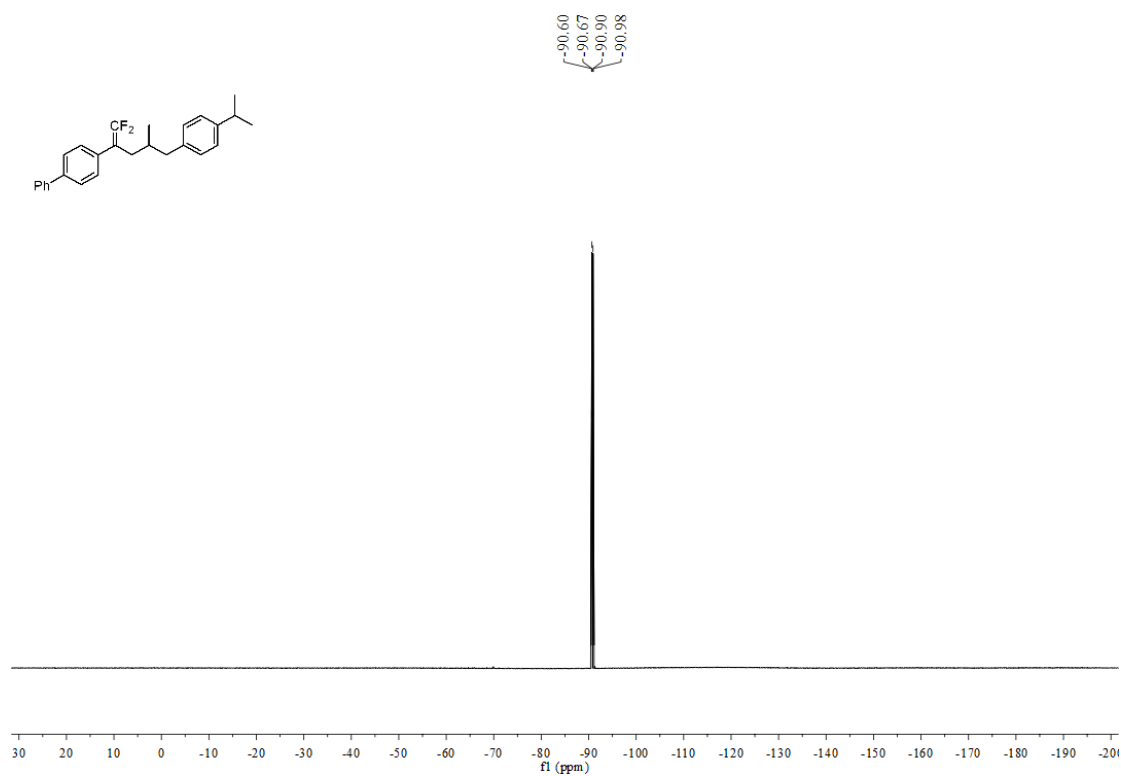

### <sup>1</sup>H NMR (600 MHz, CDCl<sub>3</sub>) spectrum of compound 23

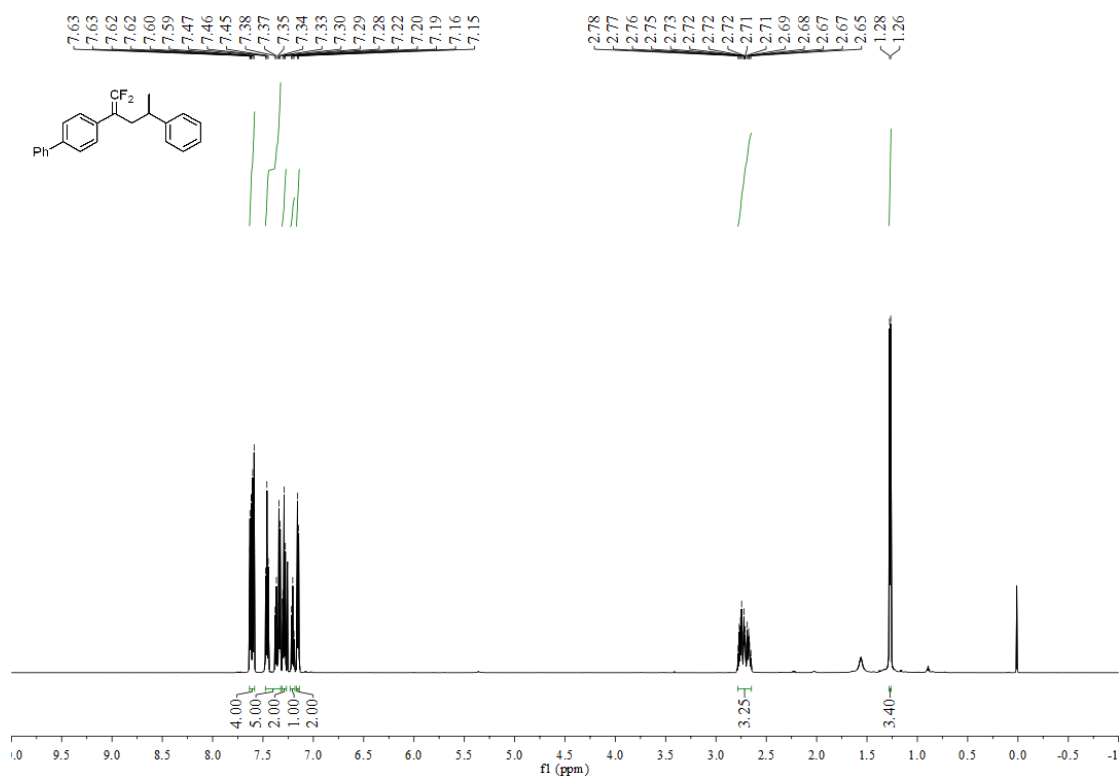

### <sup>13</sup>C NMR (151 MHz, CDCl<sub>3</sub>) spectrum of compound 23

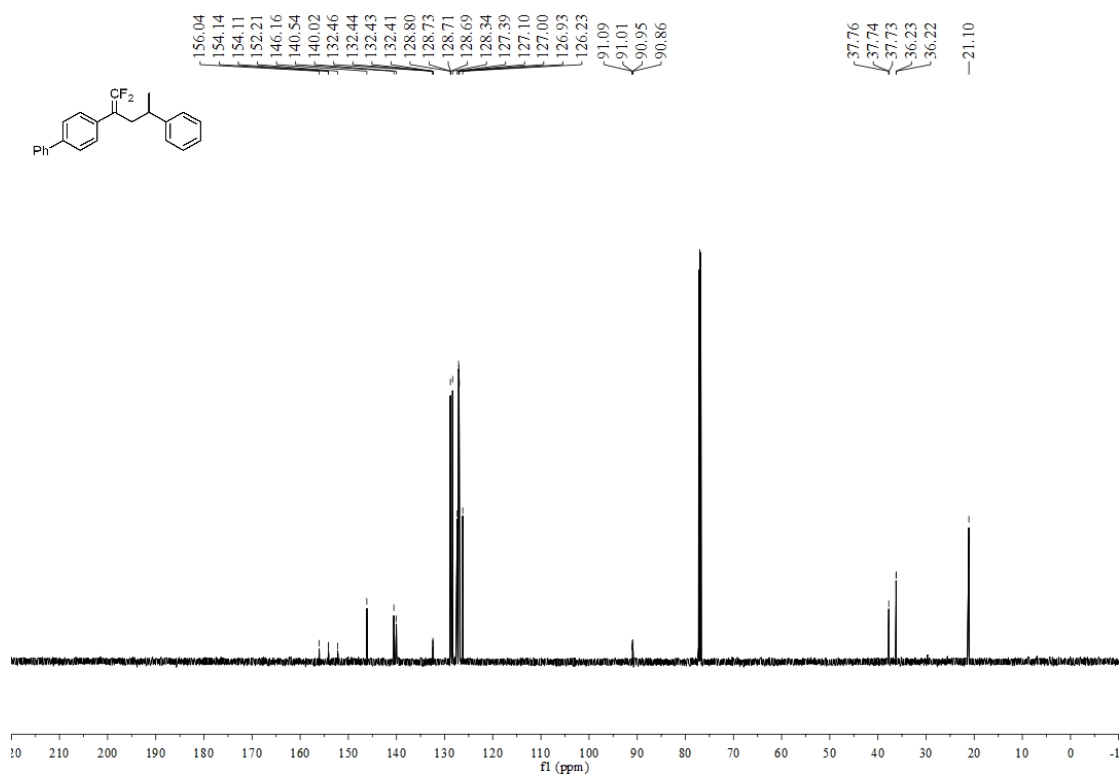

### $^{19}\text{F}$ NMR (564 MHz, $\text{CDCl}_3$ ) spectrum of compound 23

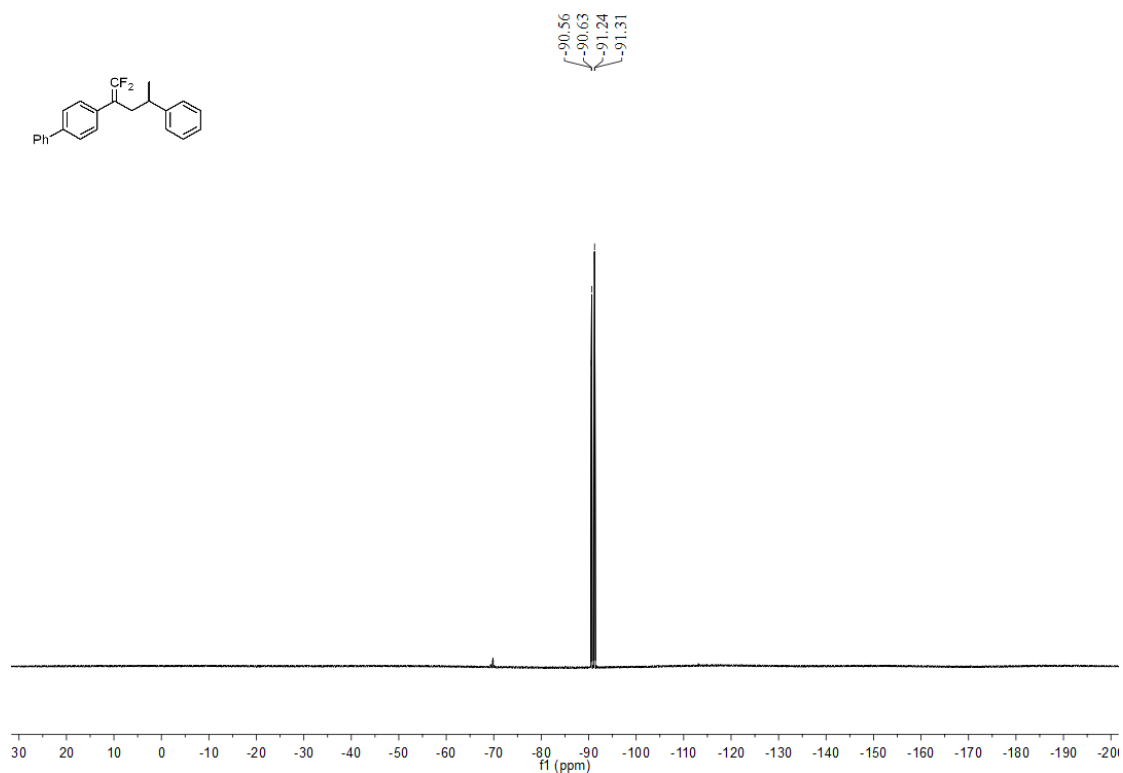

### $^1\text{H}$ NMR (600 MHz, $\text{CDCl}_3$ ) spectrum of compound 24

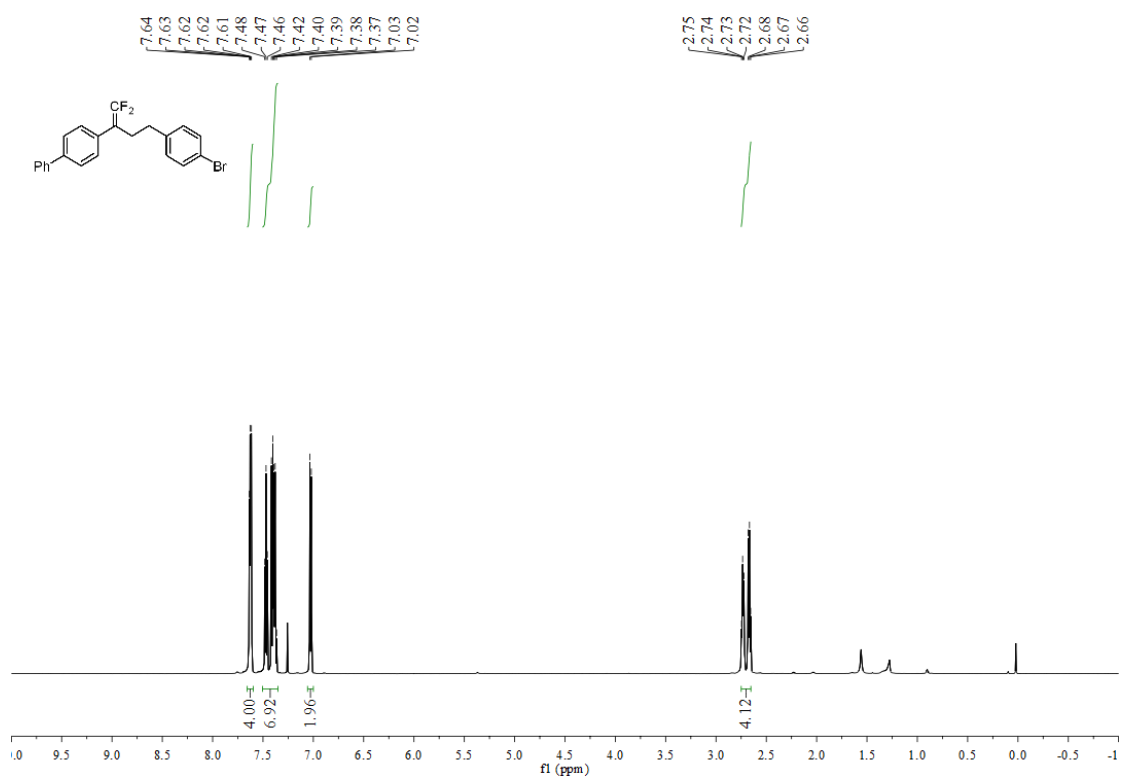

### <sup>13</sup>C NMR (151 MHz, CDCl<sub>3</sub>) spectrum of compound 24

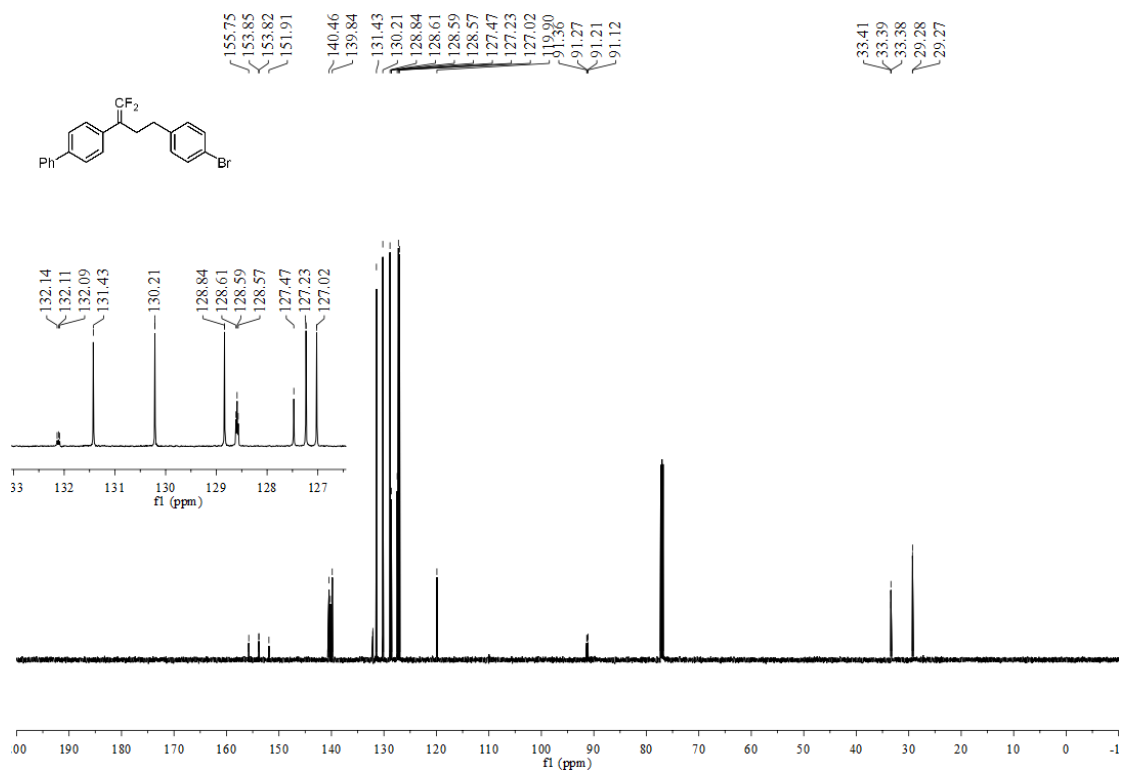

### <sup>19</sup>F NMR (564 MHz, CDCl<sub>3</sub>) spectrum of compound 24

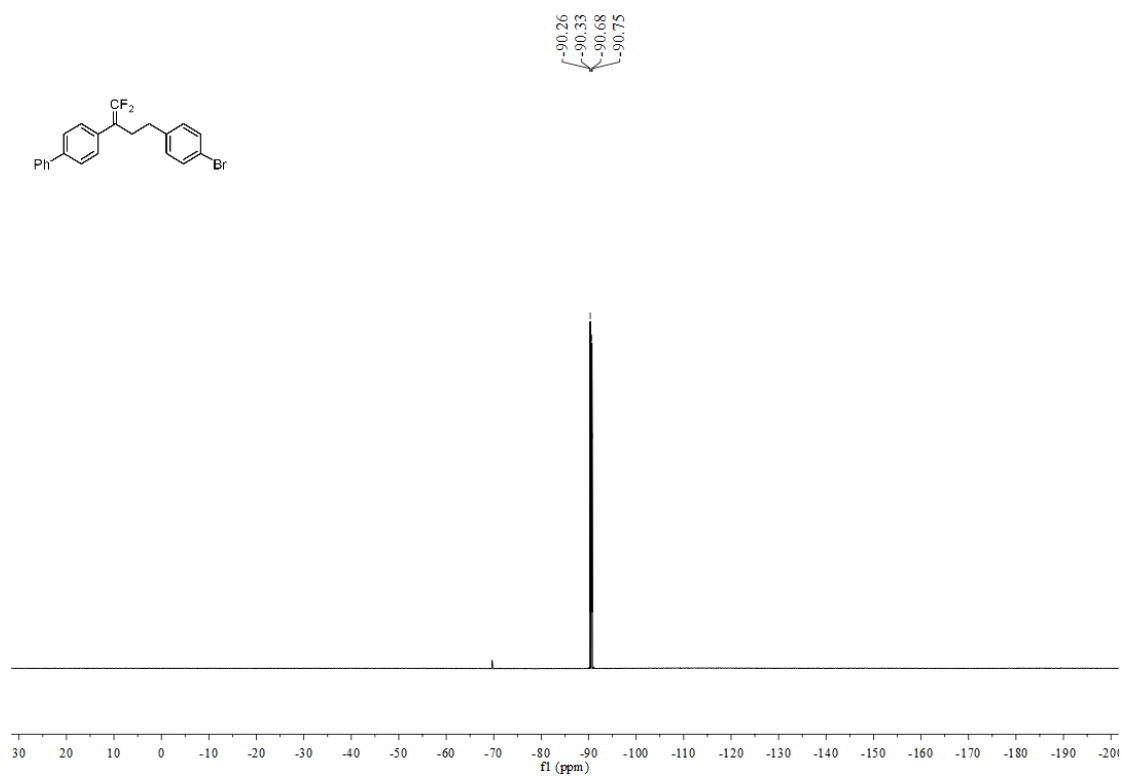



### <sup>1</sup>H NMR (600 MHz, CDCl<sub>3</sub>) spectrum of compound 25

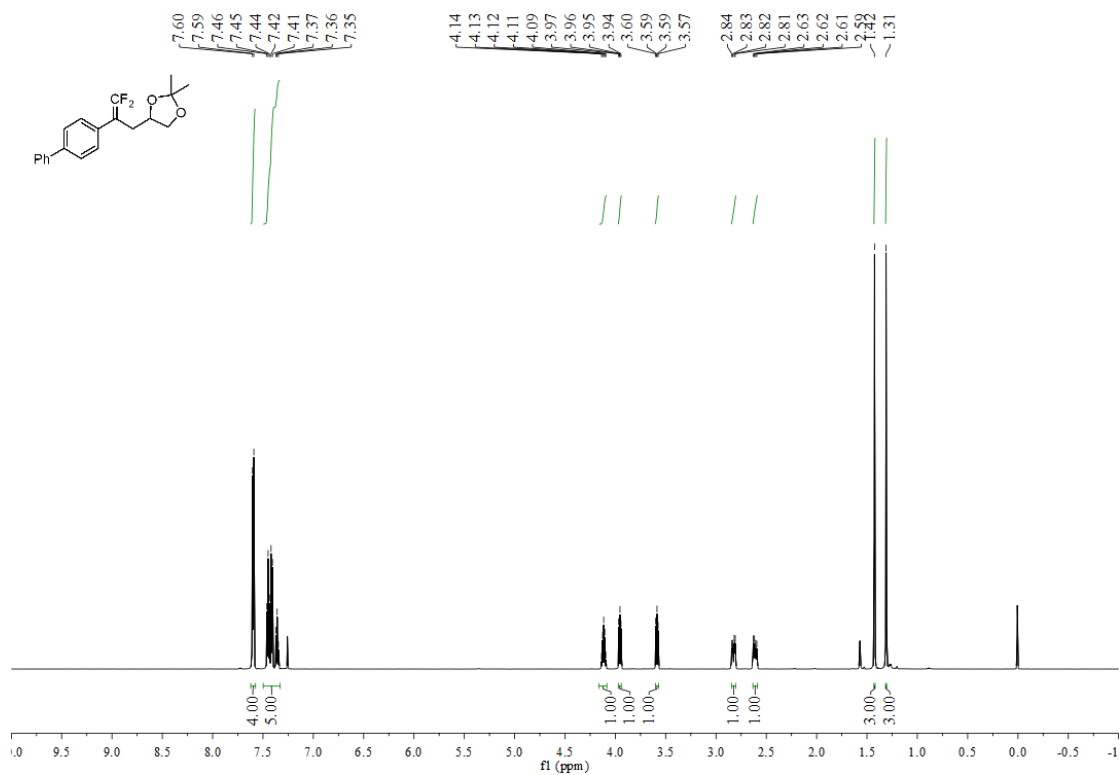

### <sup>13</sup>C NMR (151 MHz, CDCl<sub>3</sub>) spectrum of compound 25

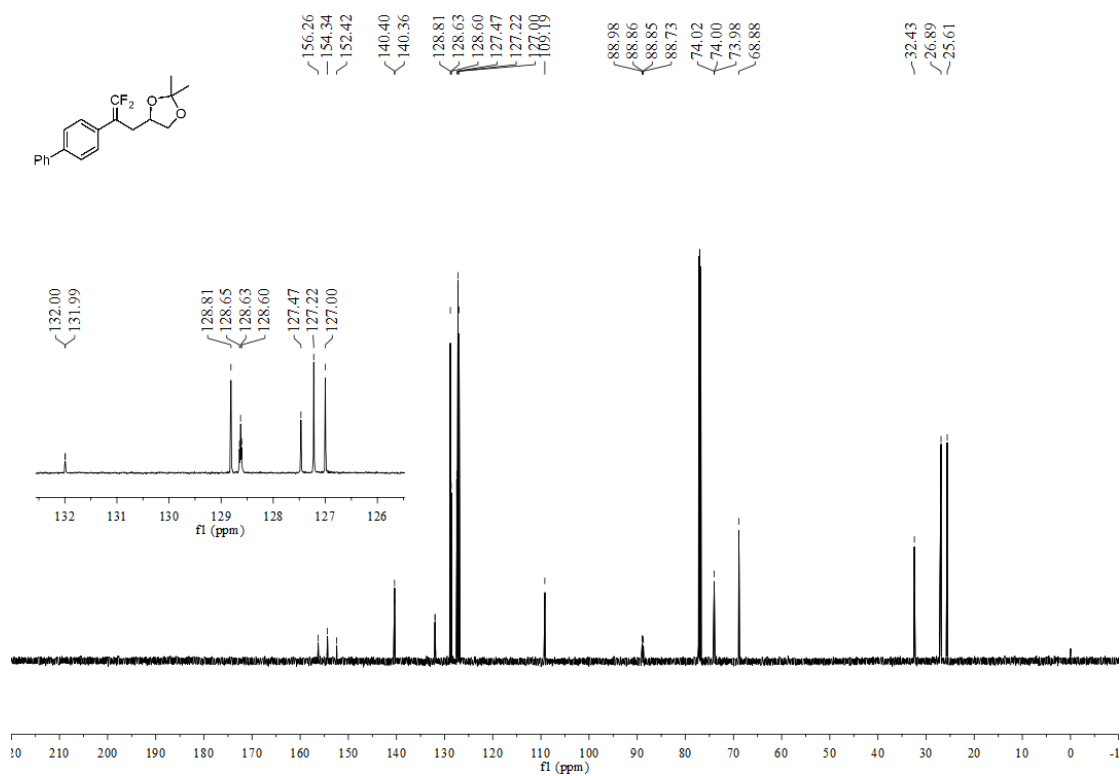

**<sup>19</sup>F NMR (564 MHz, CDCl<sub>3</sub>) spectrum of compound 25**

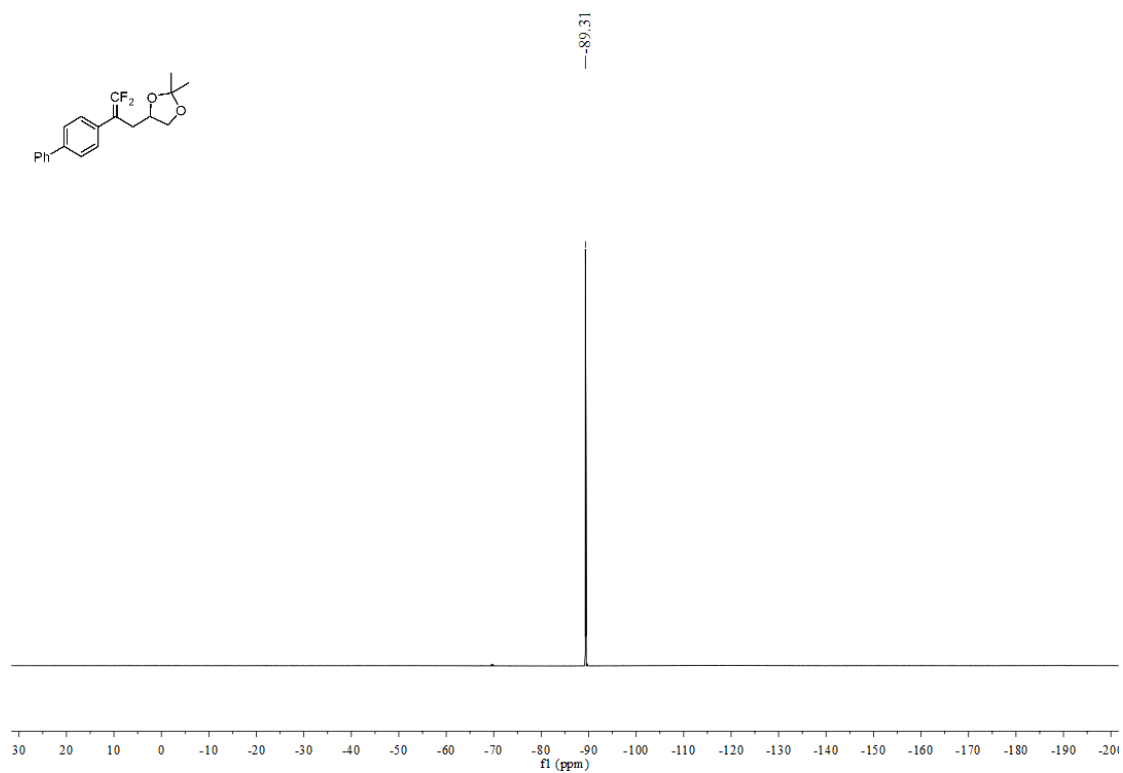

**<sup>1</sup>H NMR (600 MHz, CDCl<sub>3</sub>) spectrum of compound 26**

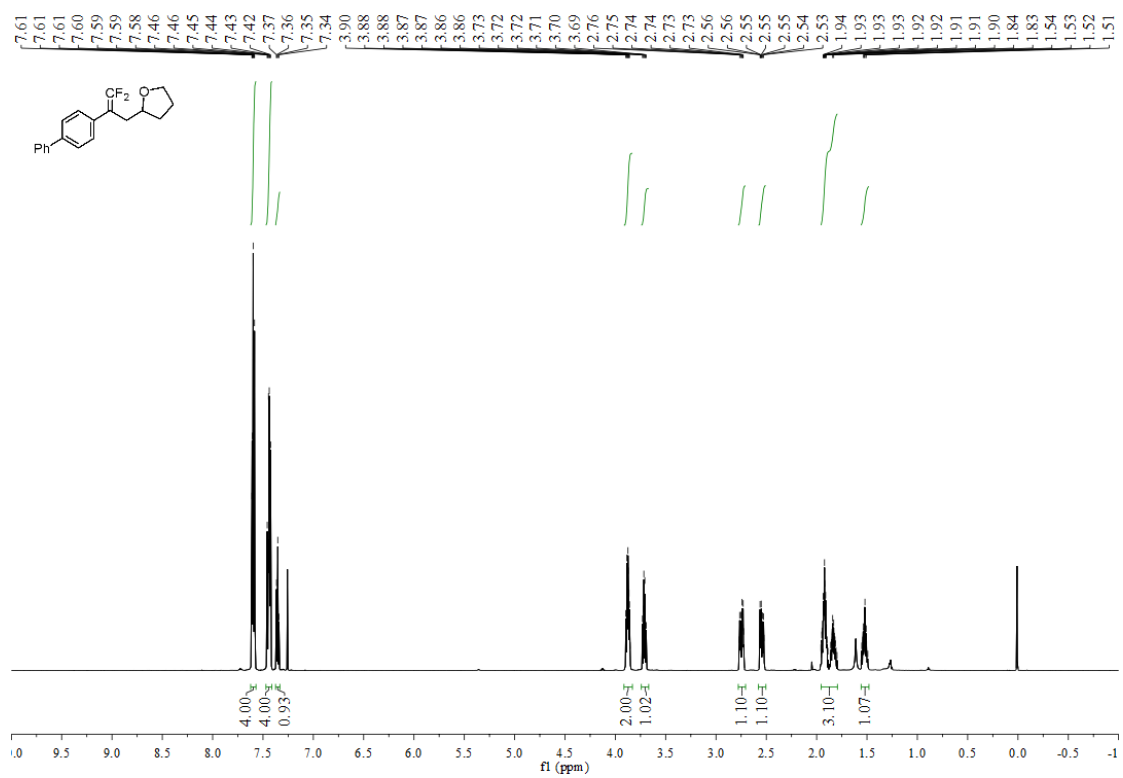

### <sup>13</sup>C NMR (151 MHz, CDCl<sub>3</sub>) spectrum of compound 26

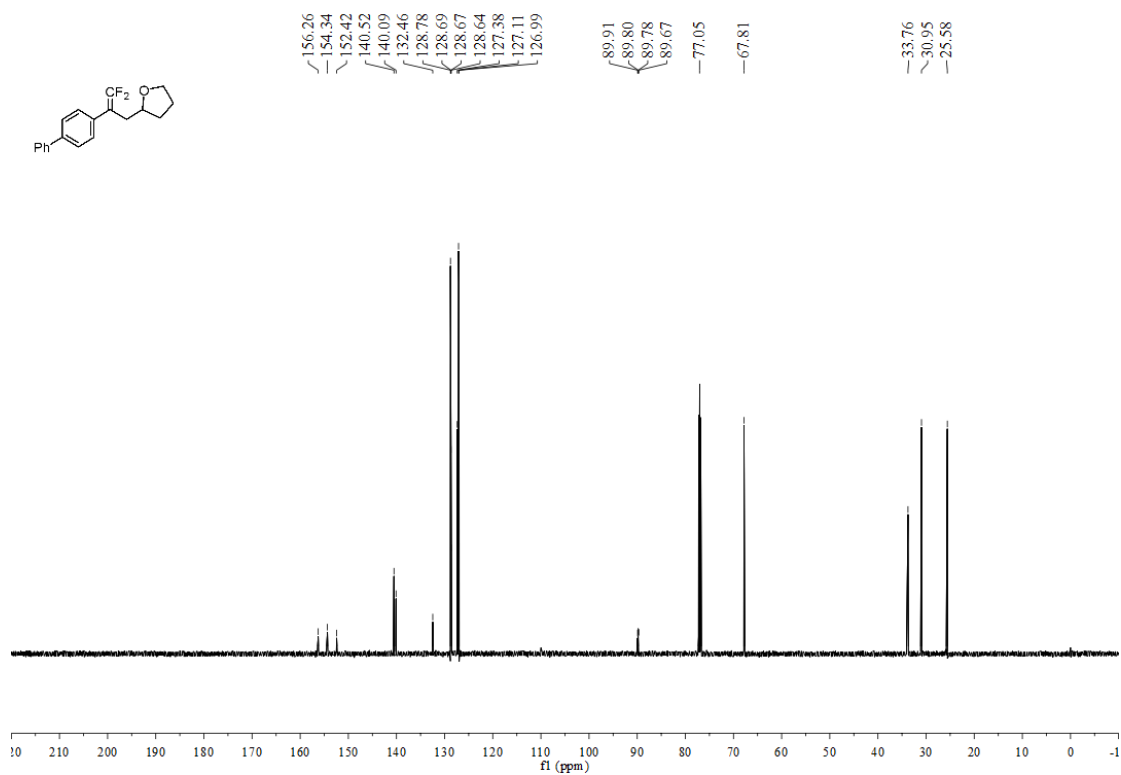

### <sup>19</sup>F NMR (564 MHz, CDCl<sub>3</sub>) spectrum of compound 26

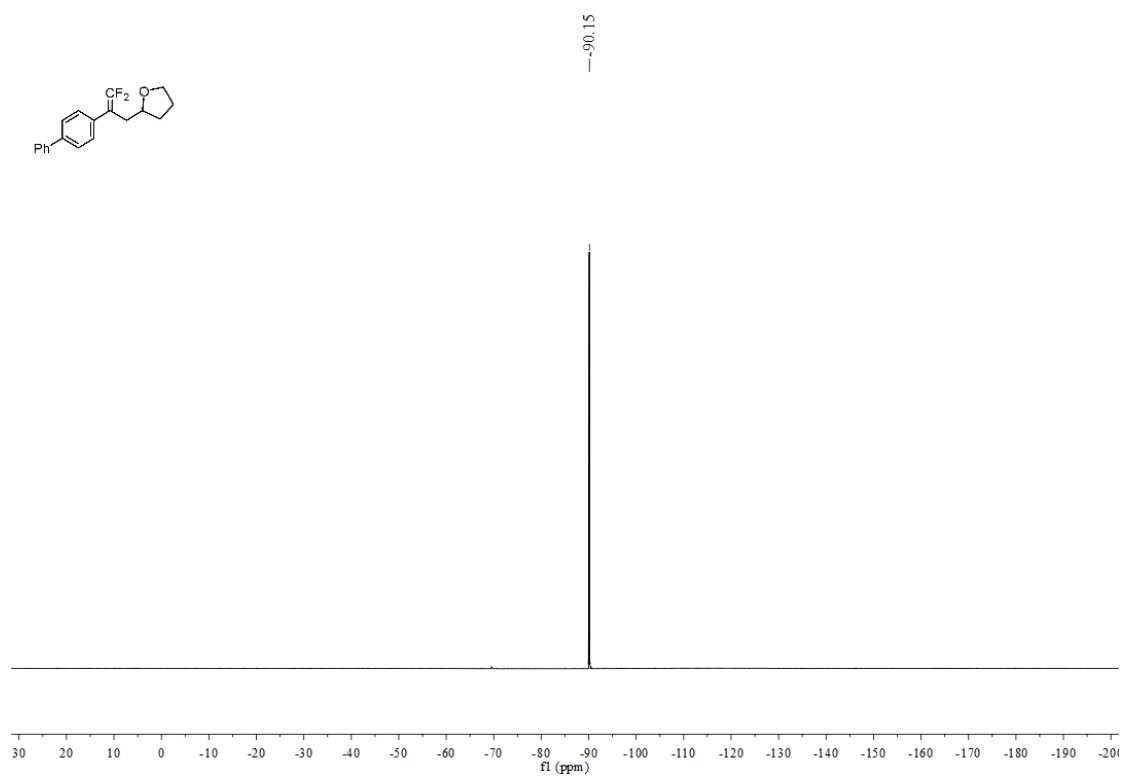

### <sup>1</sup>H NMR (600 MHz, CDCl<sub>3</sub>) spectrum of compound 27

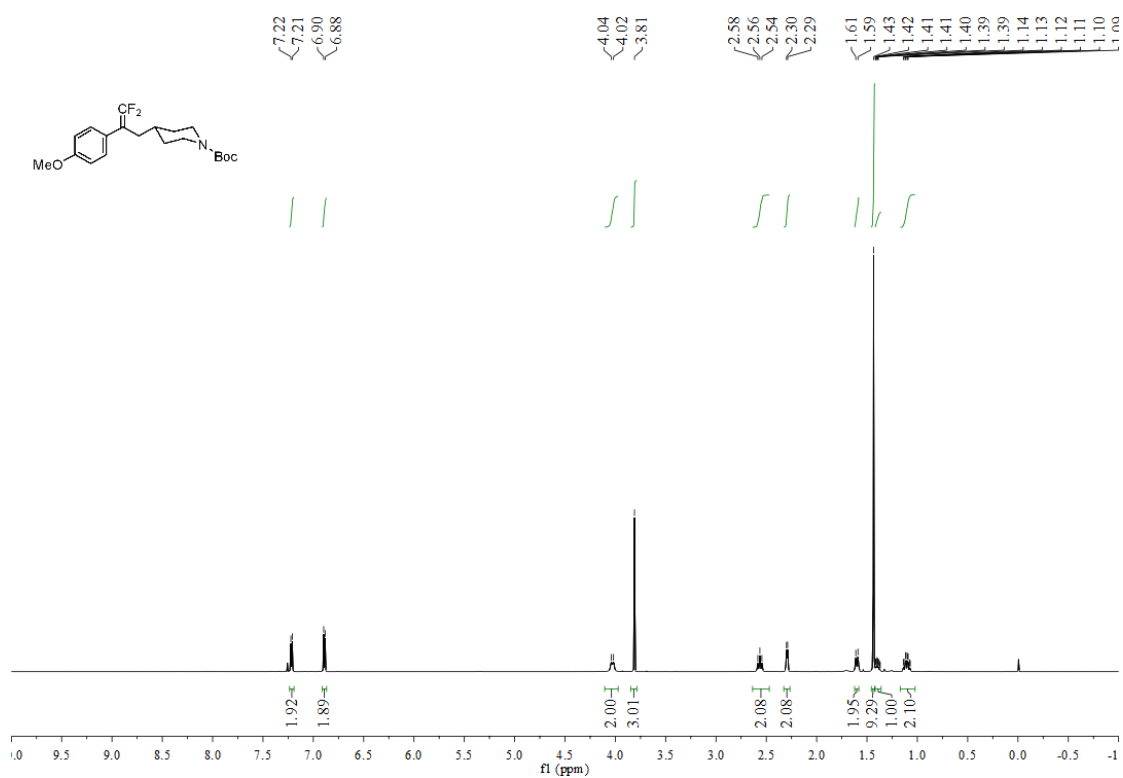

### <sup>13</sup>C NMR (151 MHz, CDCl<sub>3</sub>) spectrum of compound 27

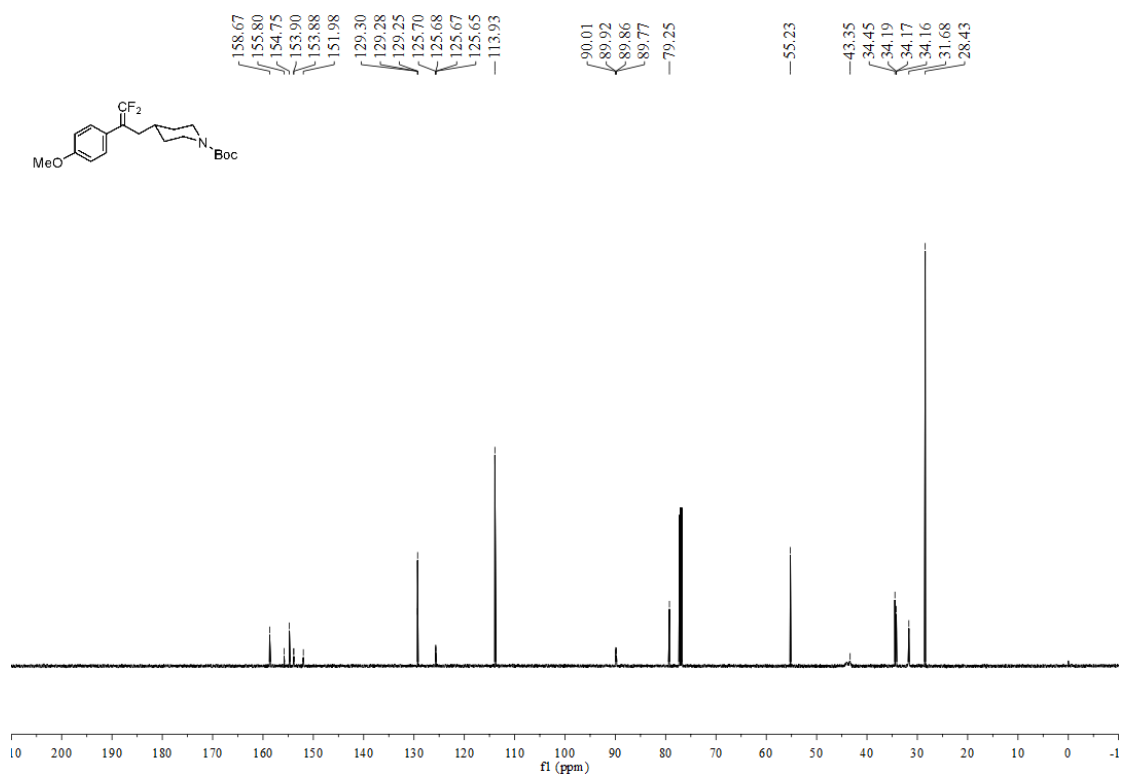

### <sup>19</sup>F NMR (564 MHz, CDCl<sub>3</sub>) spectrum of compound 27

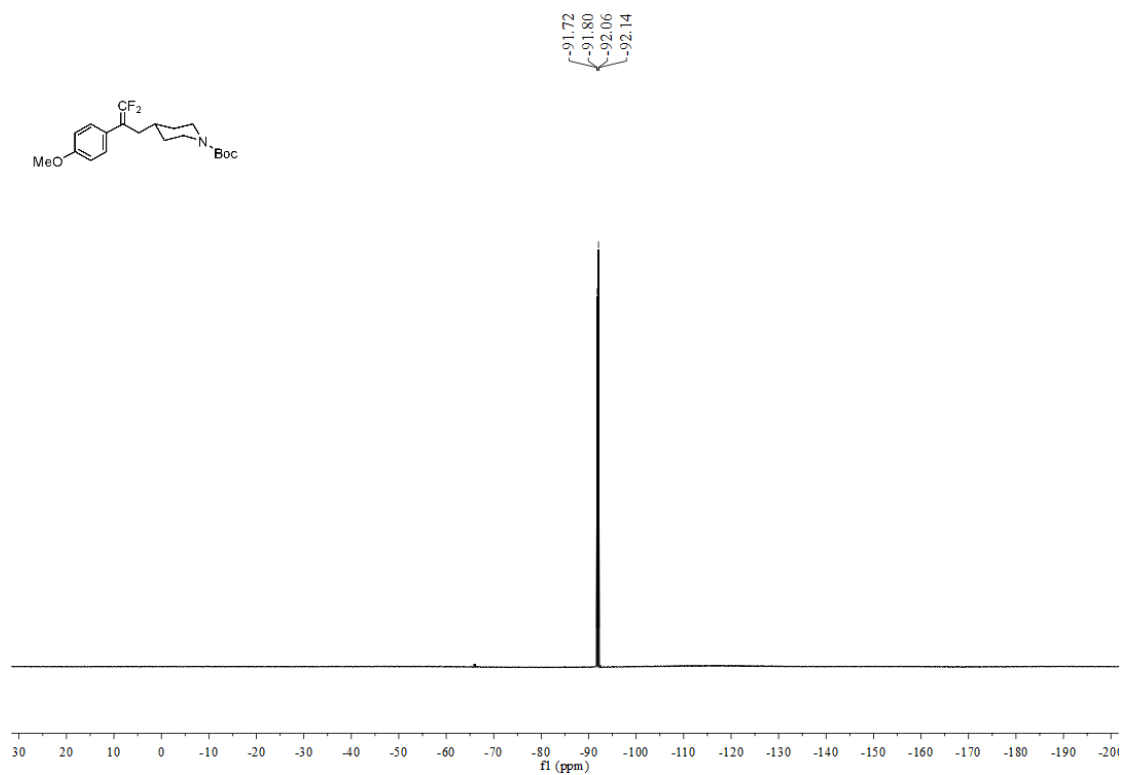

### <sup>1</sup>H NMR (600 MHz, CDCl<sub>3</sub>) spectrum of compound 28

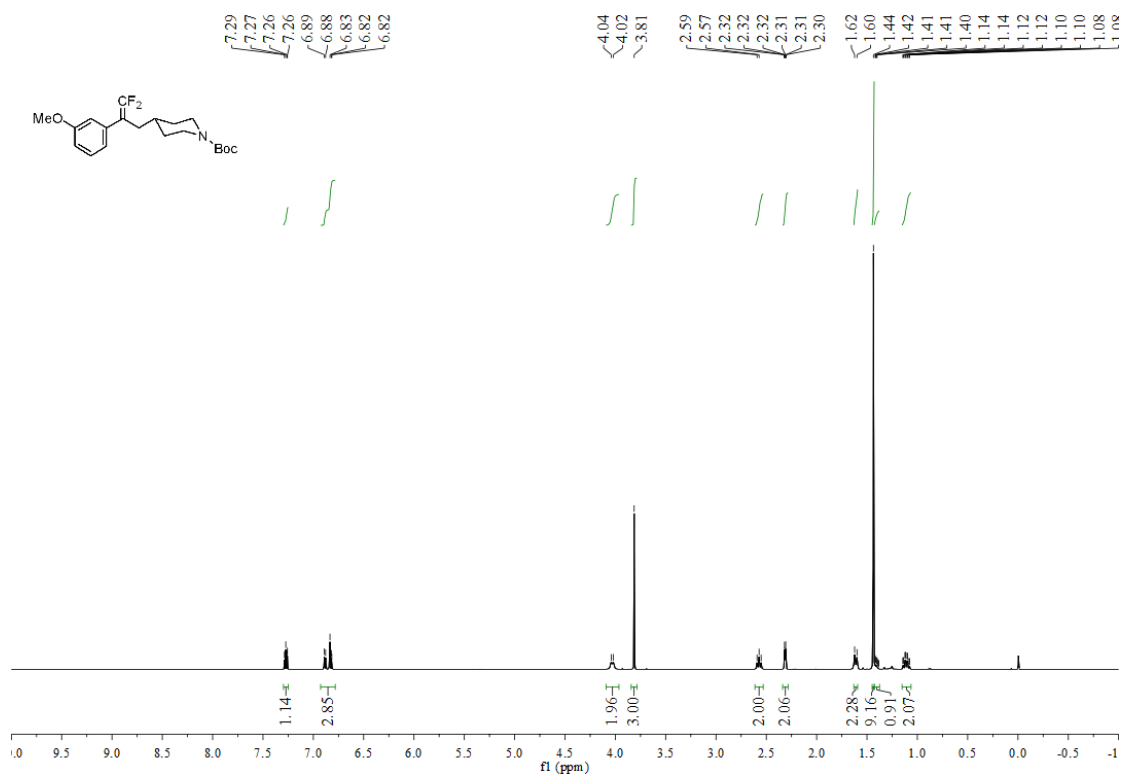

### <sup>13</sup>C NMR (151 MHz, CDCl<sub>3</sub>) spectrum of compound 28

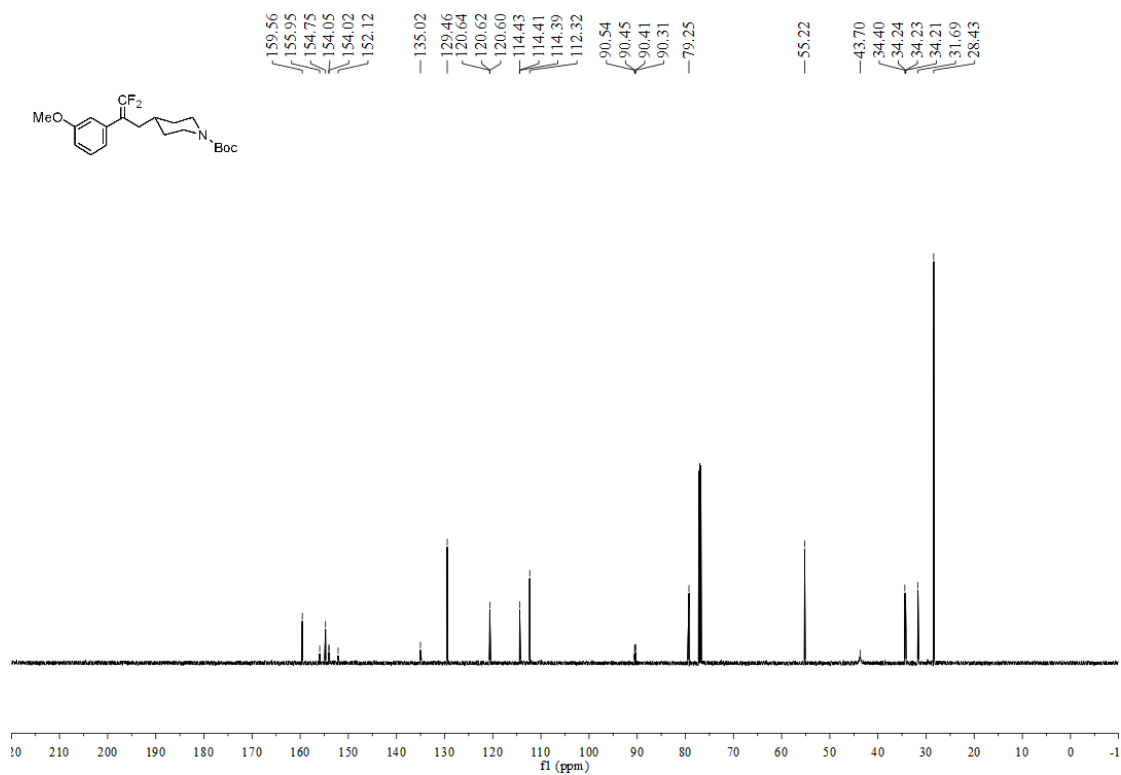

### <sup>19</sup>F NMR (564 MHz, CDCl<sub>3</sub>) spectrum of compound 28

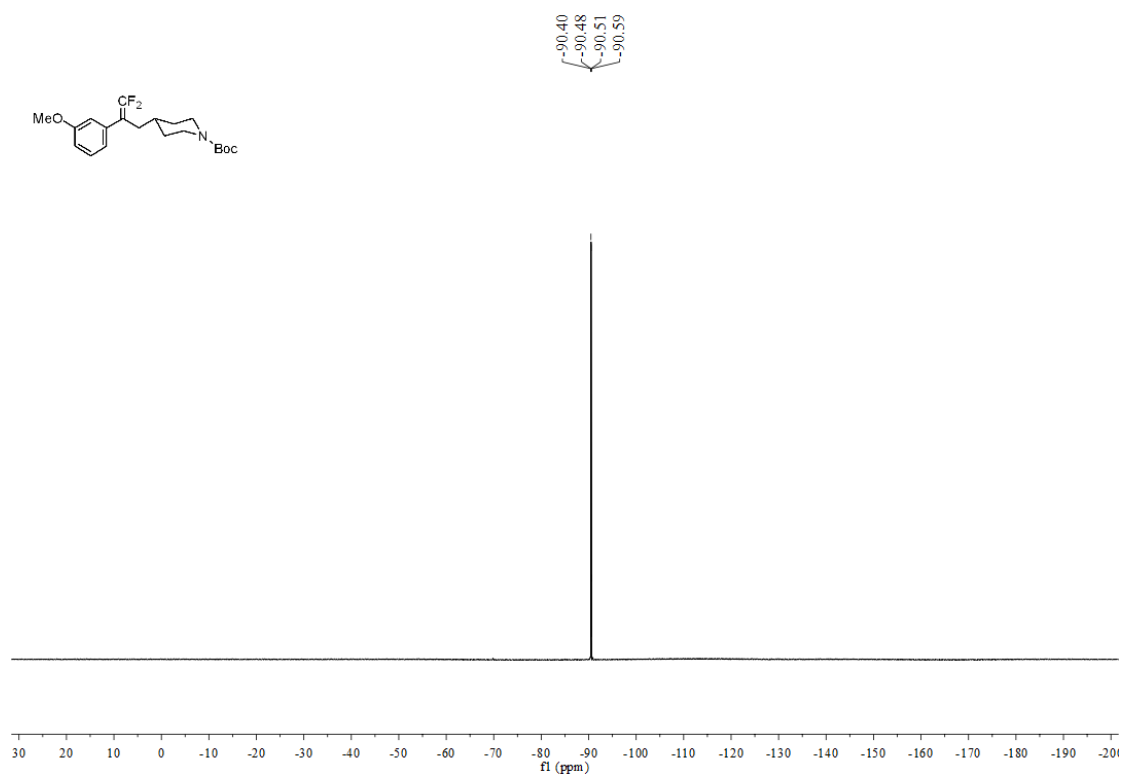

### <sup>1</sup>H NMR (600 MHz, CDCl<sub>3</sub>) spectrum of compound 29

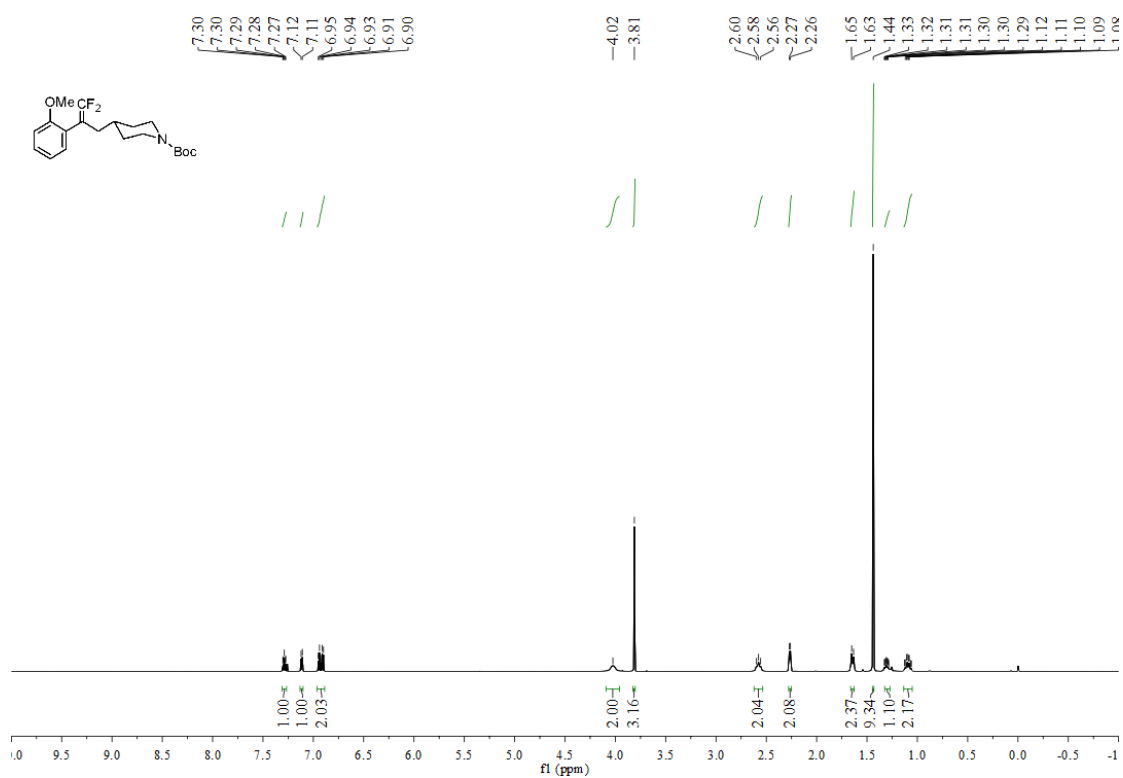

### <sup>13</sup>C NMR (151 MHz, CDCl<sub>3</sub>) spectrum of compound 29

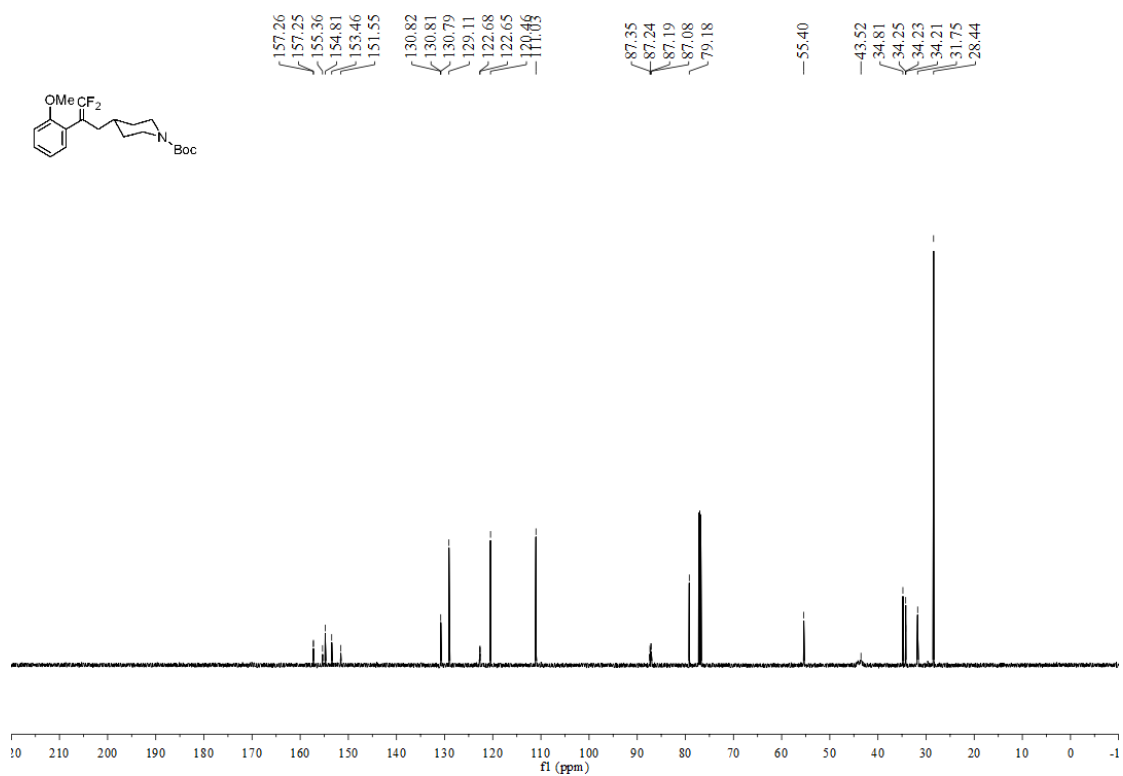

### $^{19}\text{F}$ NMR (564 MHz, $\text{CDCl}_3$ ) spectrum of compound 29

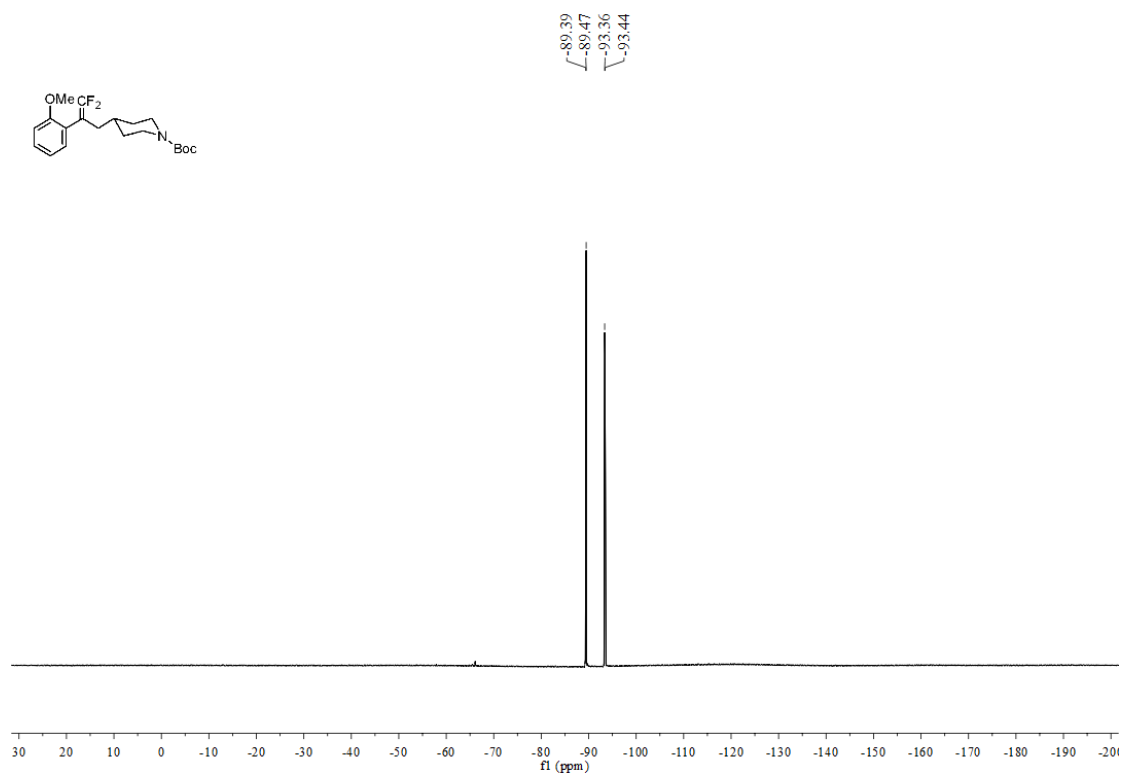

### $^1\text{H}$ NMR (600 MHz, $\text{CDCl}_3$ ) spectrum of compound 30

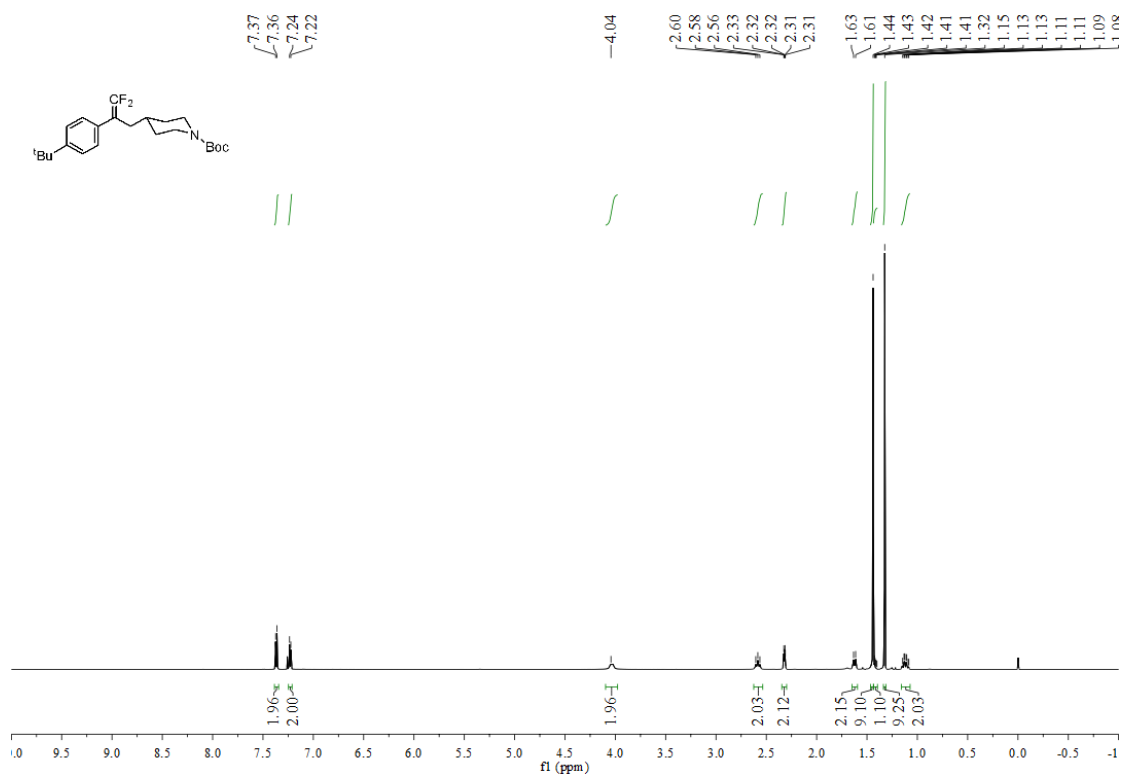



### <sup>13</sup>C NMR (151 MHz, CDCl<sub>3</sub>) spectrum of compound 30

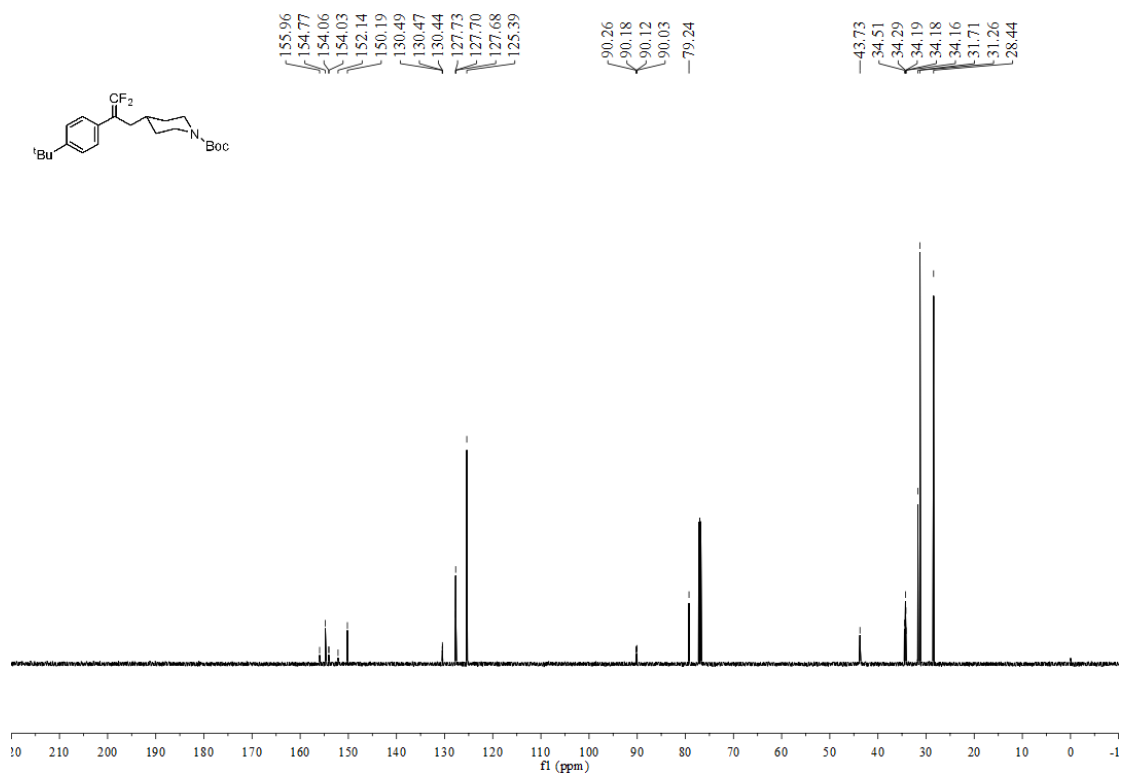

### <sup>19</sup>F NMR (564 MHz, CDCl<sub>3</sub>) spectrum of compound 30

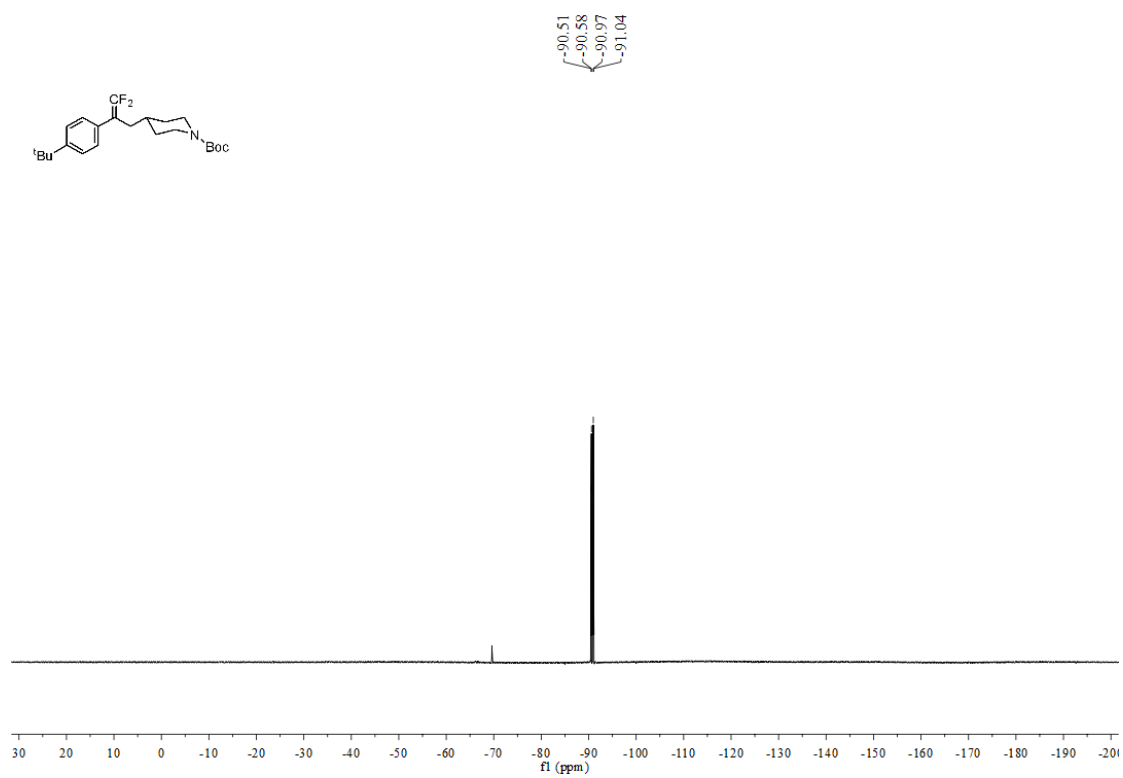

### <sup>1</sup>H NMR (600 MHz, CDCl<sub>3</sub>) spectrum of compound 31

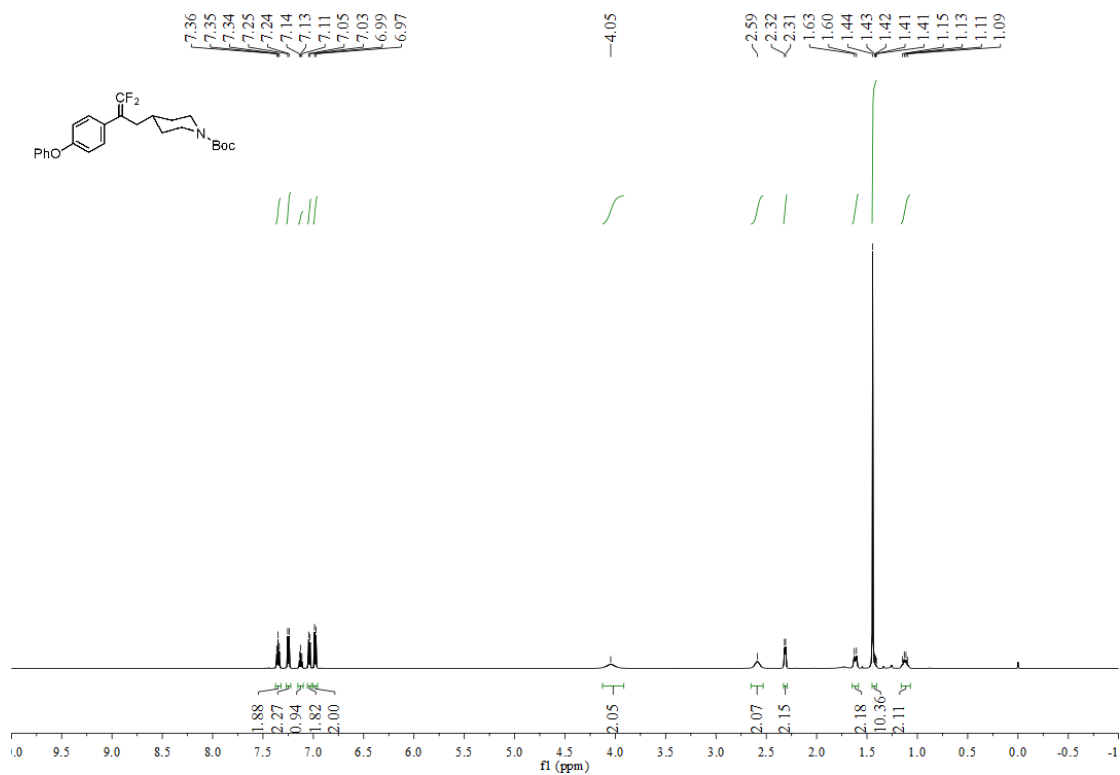

### <sup>13</sup>C NMR (151 MHz, CDCl<sub>3</sub>) spectrum of compound 31

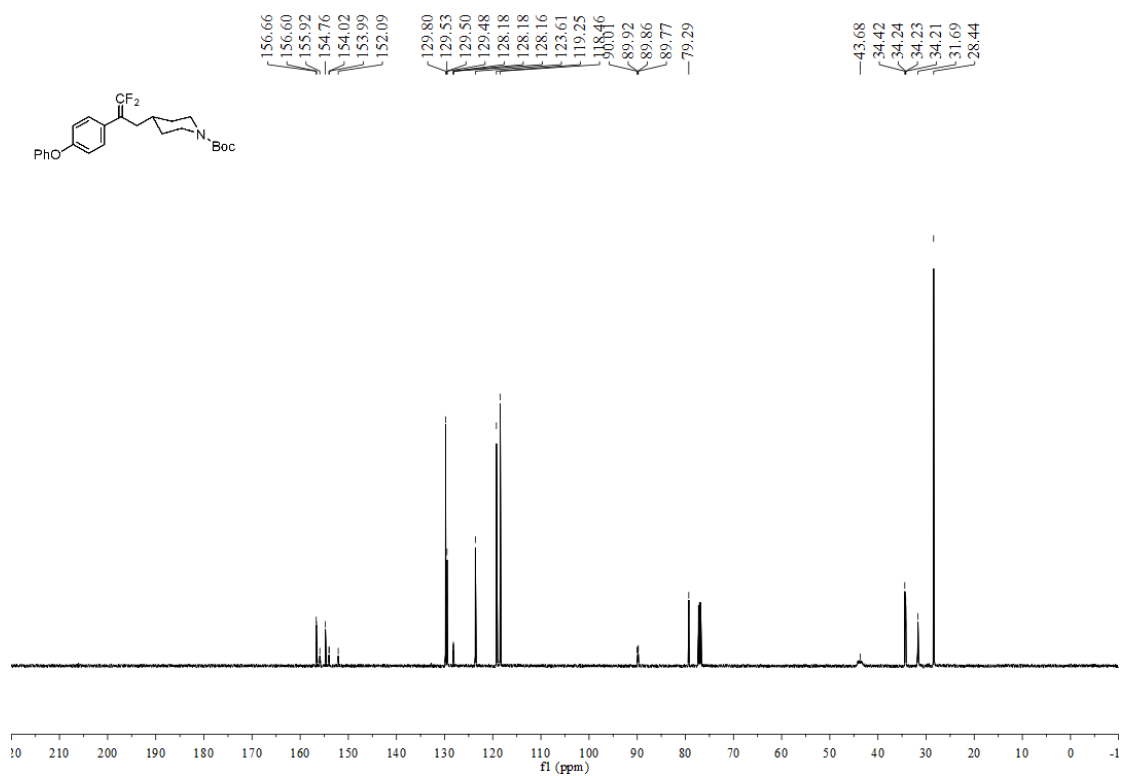

**$^{19}\text{F}$  NMR (564 MHz,  $\text{CDCl}_3$ ) spectrum of compound 31**

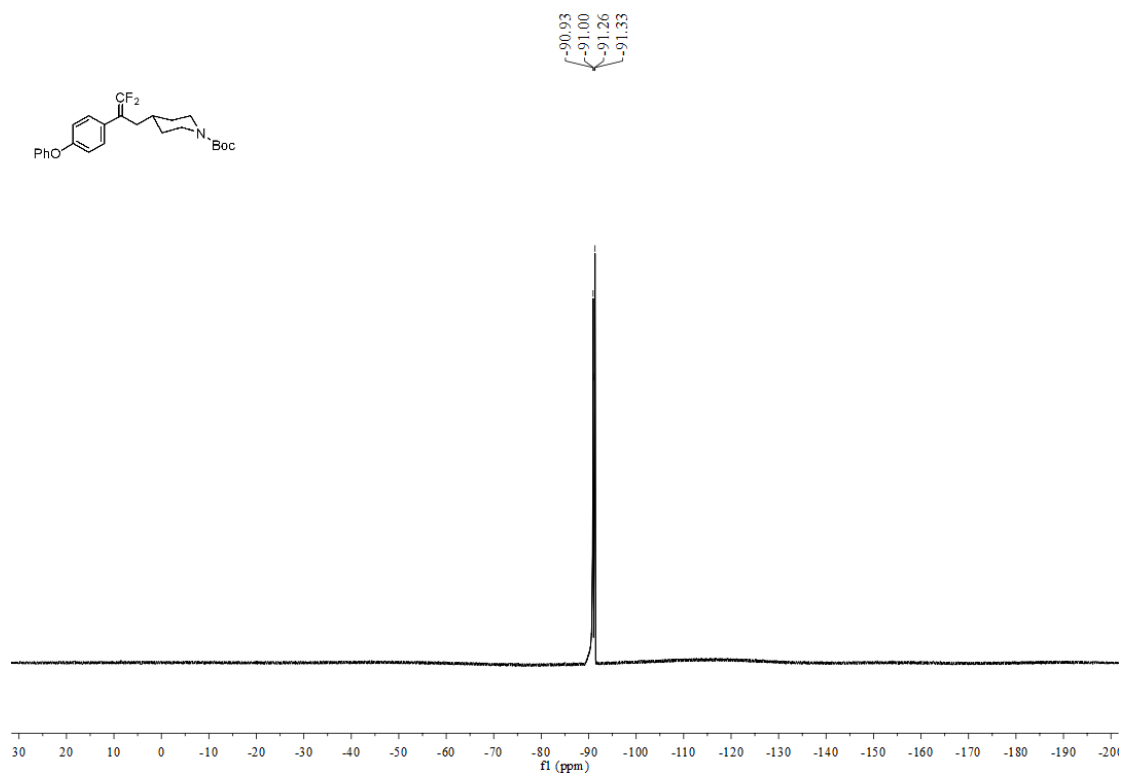

**$^1\text{H}$  NMR (600 MHz,  $\text{CDCl}_3$ ) spectrum of compound 31**

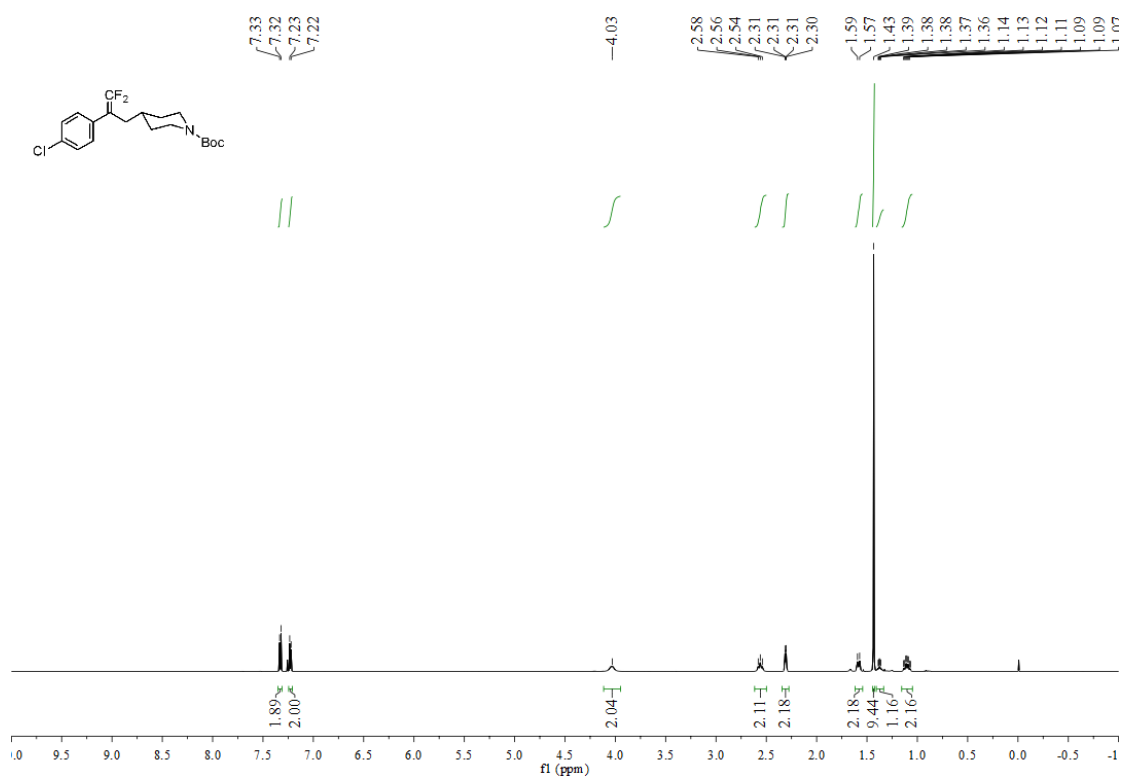

### <sup>13</sup>C NMR (151 MHz, CDCl<sub>3</sub>) spectrum of compound 32

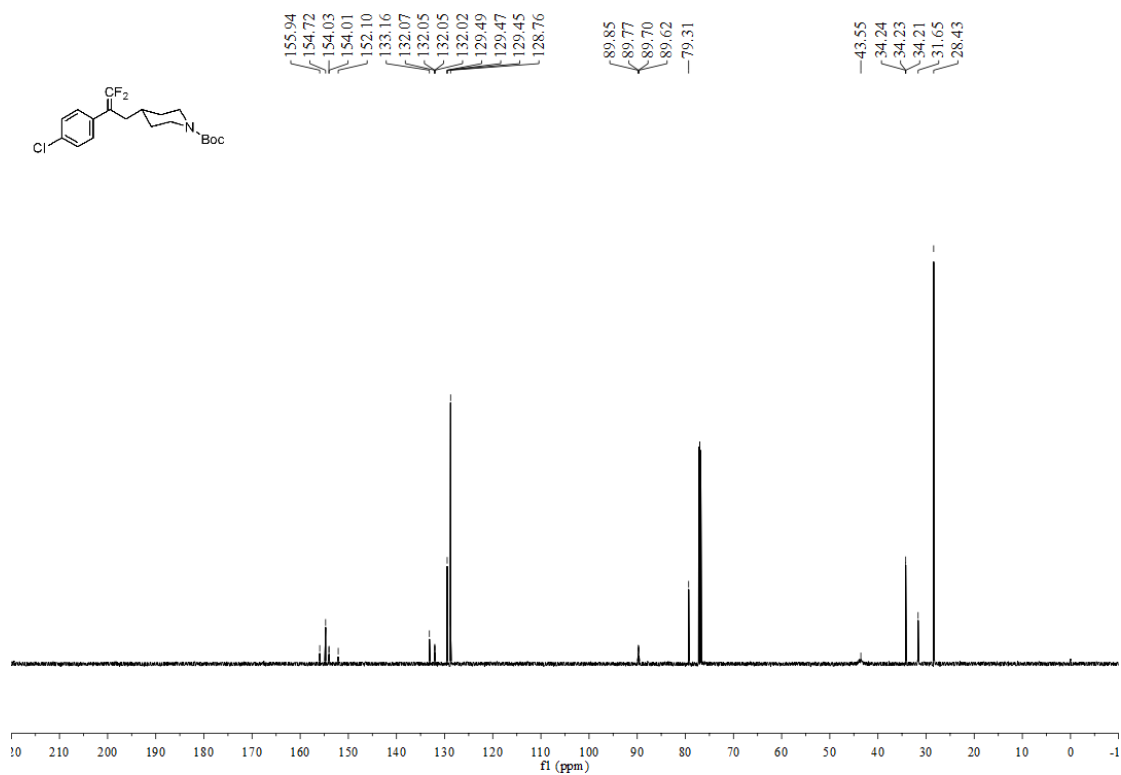

### <sup>19</sup>F NMR (564 MHz, CDCl<sub>3</sub>) spectrum of compound 32

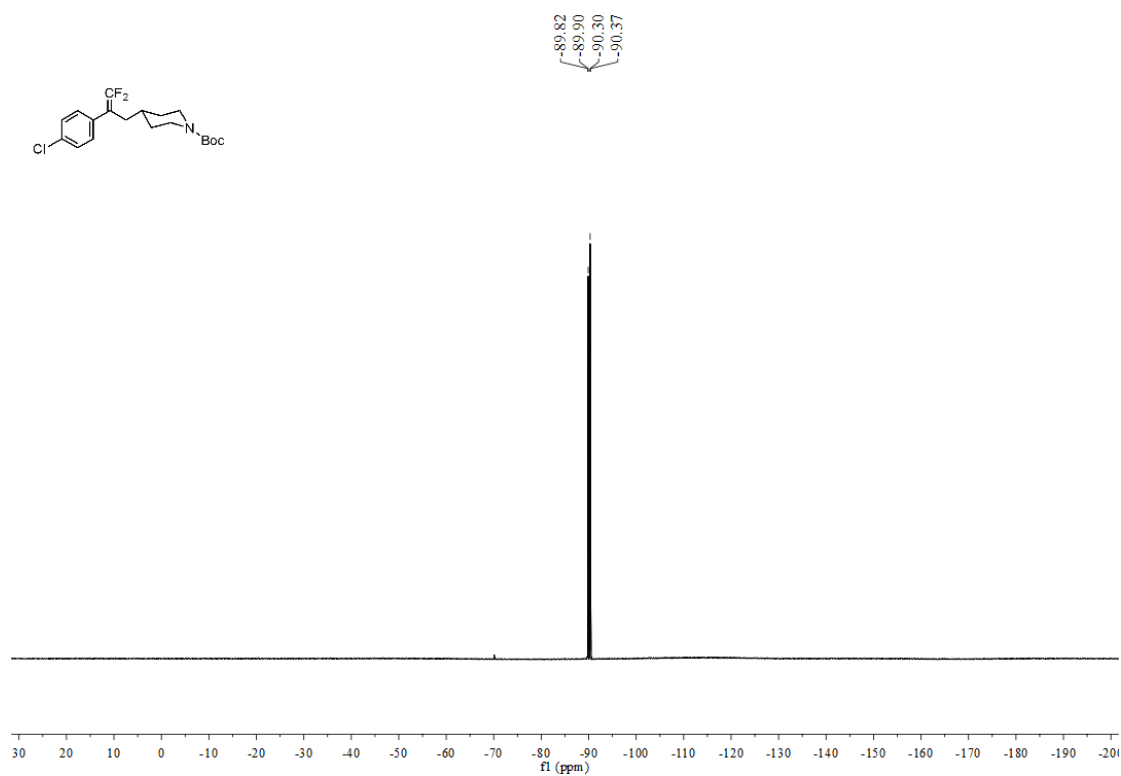

### <sup>1</sup>H NMR (600 MHz, CDCl<sub>3</sub>) spectrum of compound 33

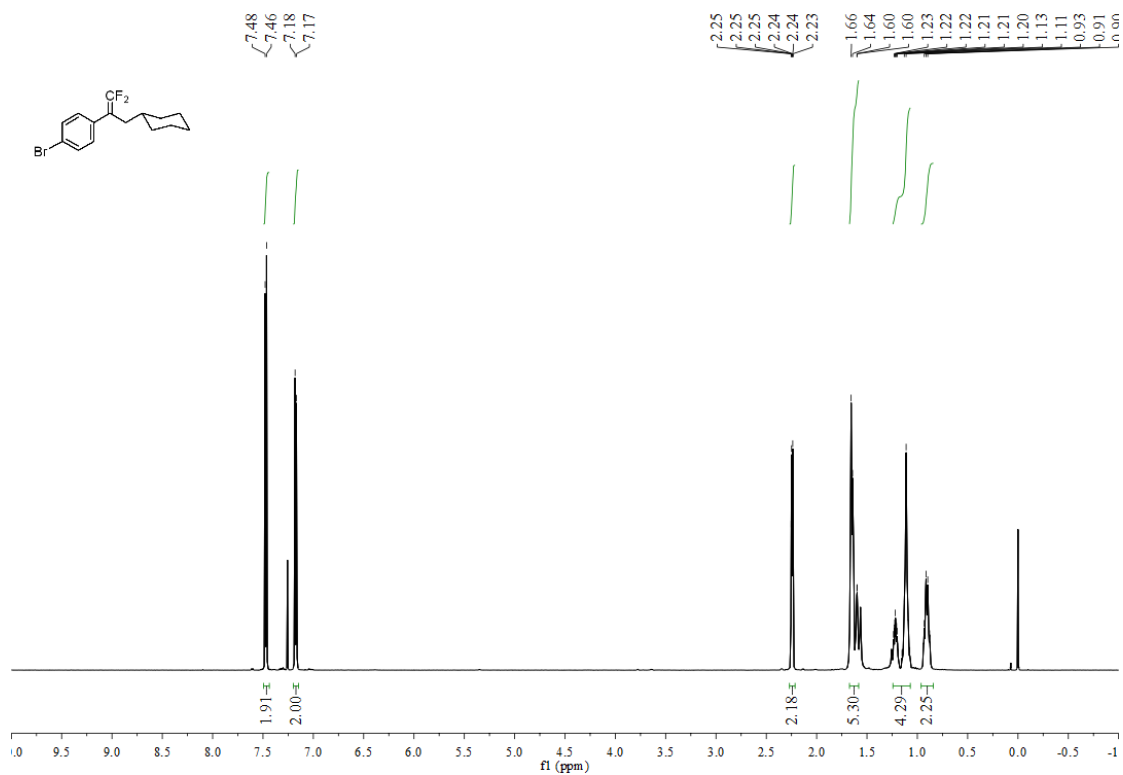

### <sup>13</sup>C NMR (151 MHz, CDCl<sub>3</sub>) spectrum of compound 33

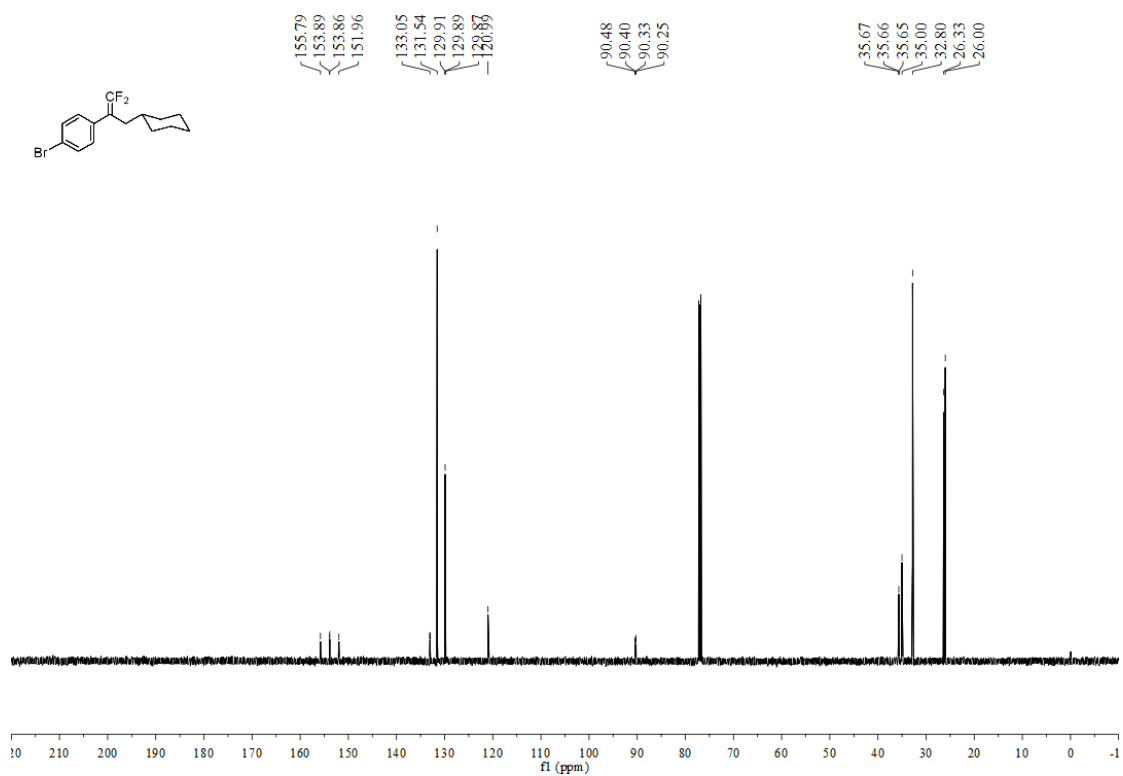

### $^{19}\text{F}$ NMR (564 MHz, $\text{CDCl}_3$ ) spectrum of compound 33

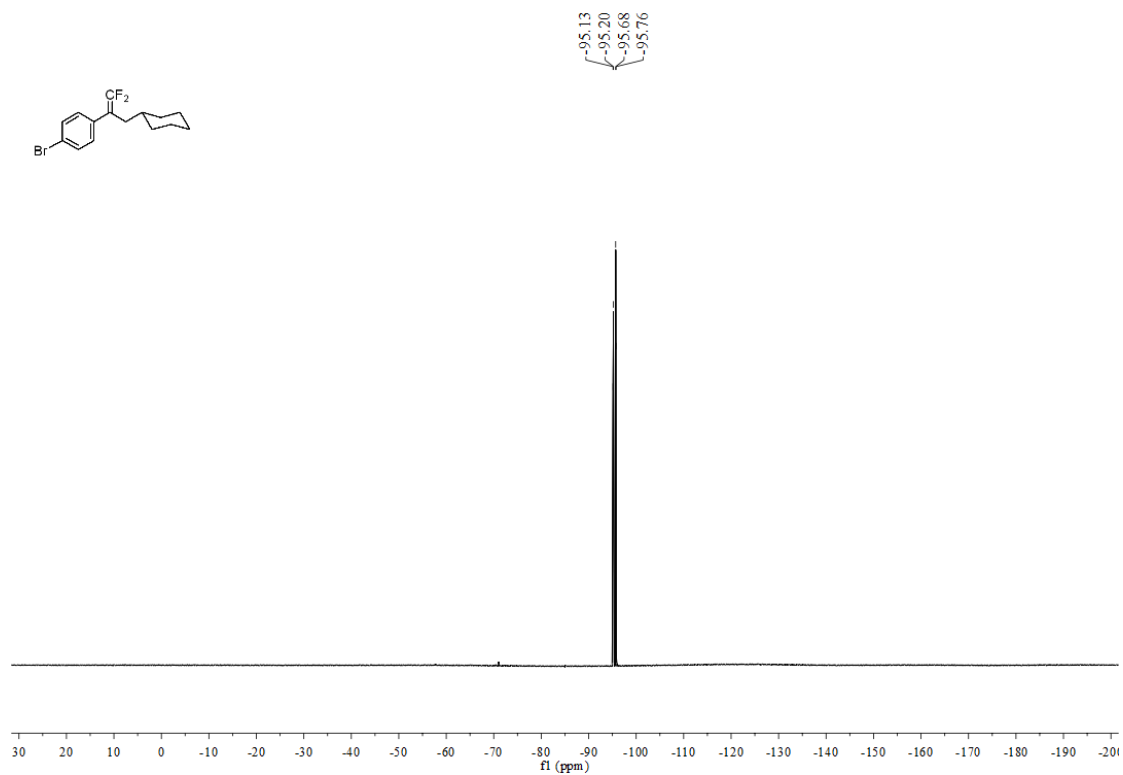

### $^1\text{H}$ NMR (600 MHz, $\text{CDCl}_3$ ) spectrum of compound 34

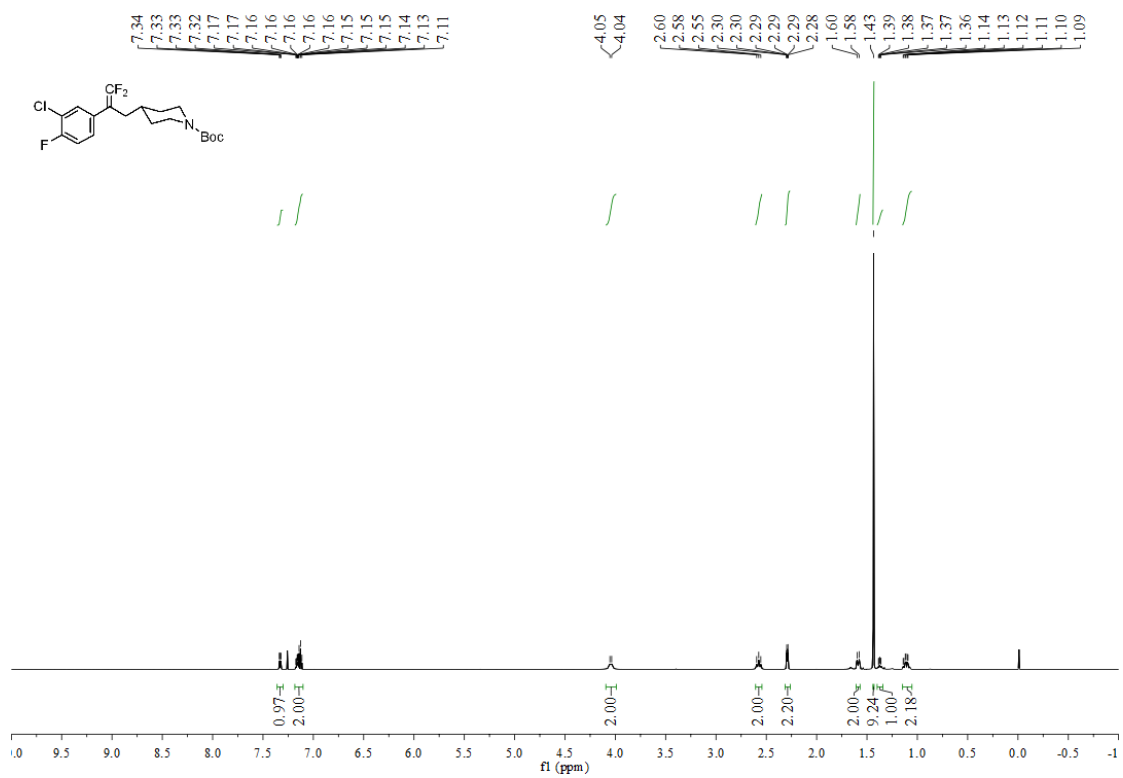

### <sup>13</sup>C NMR (151 MHz, CDCl<sub>3</sub>) spectrum of compound 34

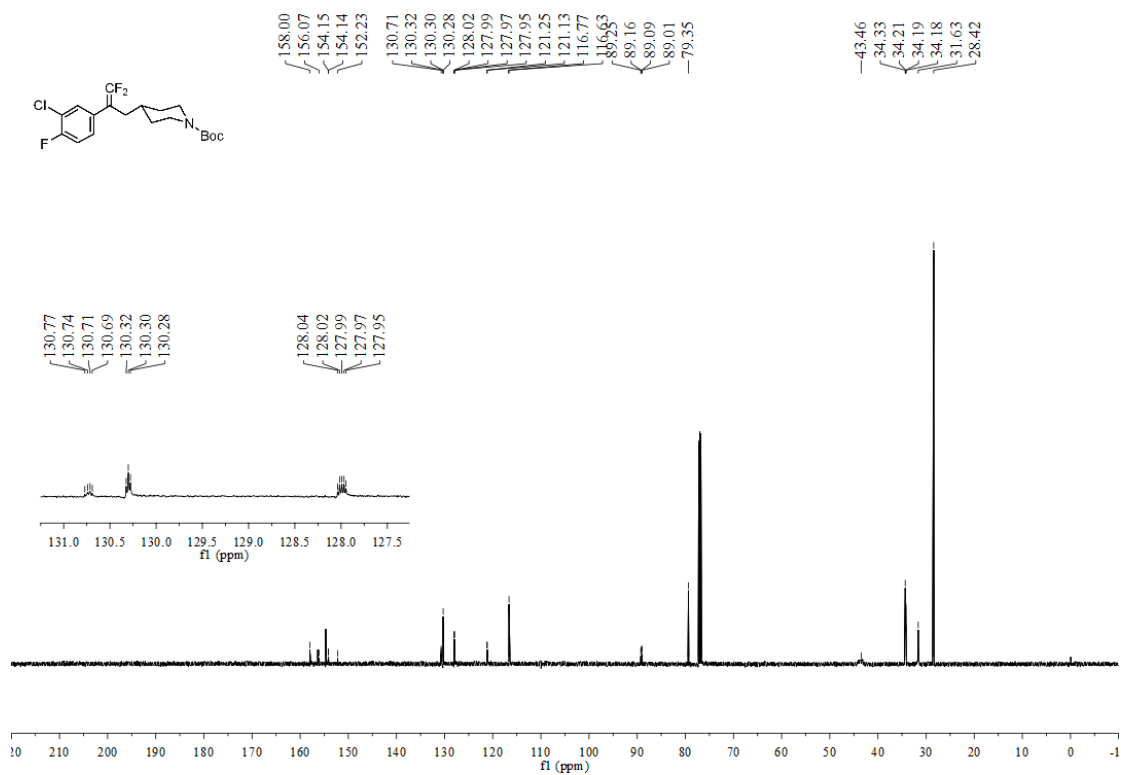

### <sup>19</sup>F NMR (564 MHz, CDCl<sub>3</sub>) spectrum of compound 34

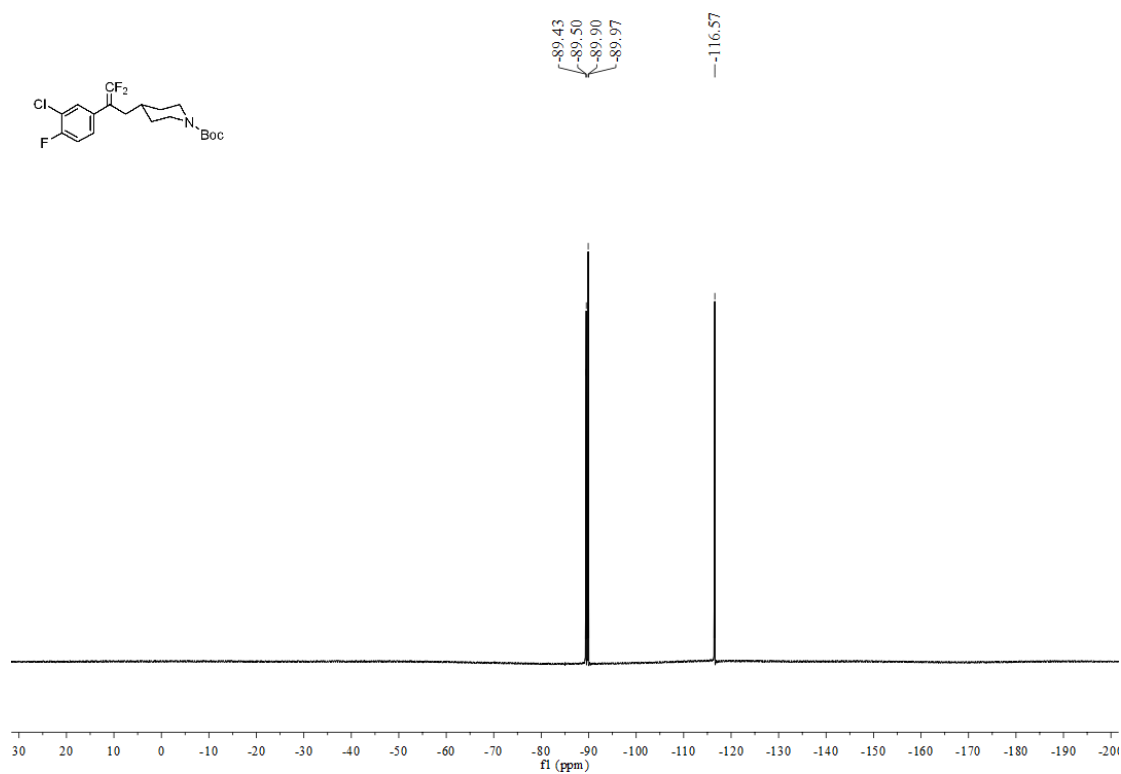

**<sup>1</sup>H NMR (600 MHz, CDCl<sub>3</sub>) spectrum of compound 35**

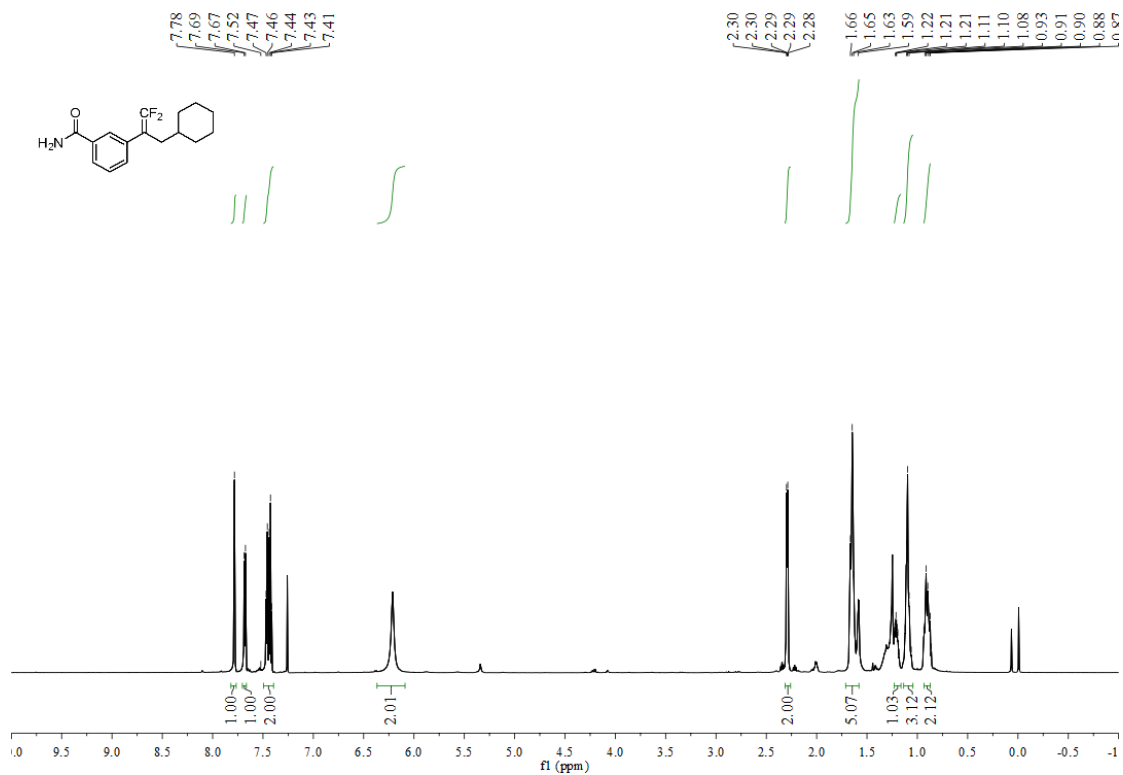

**<sup>13</sup>C NMR (151 MHz, CDCl<sub>3</sub>) spectrum of compound 35**

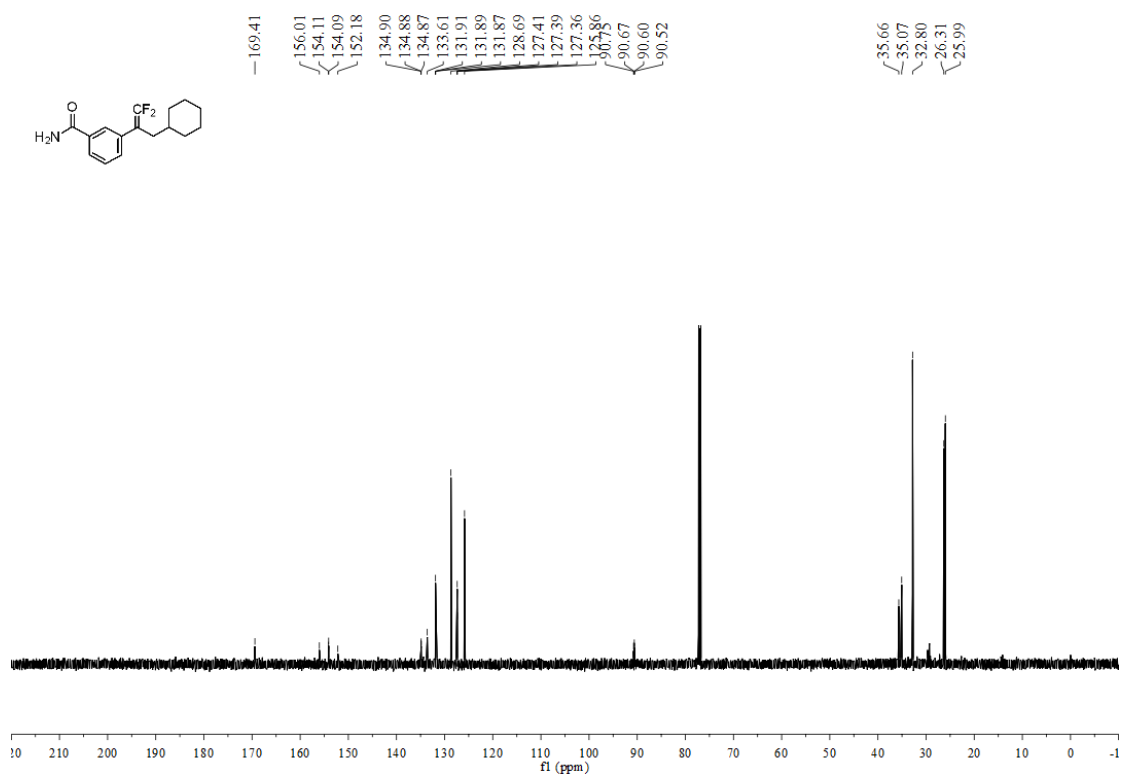



### <sup>19</sup>F NMR (564 MHz, CDCl<sub>3</sub>) spectrum of compound 35

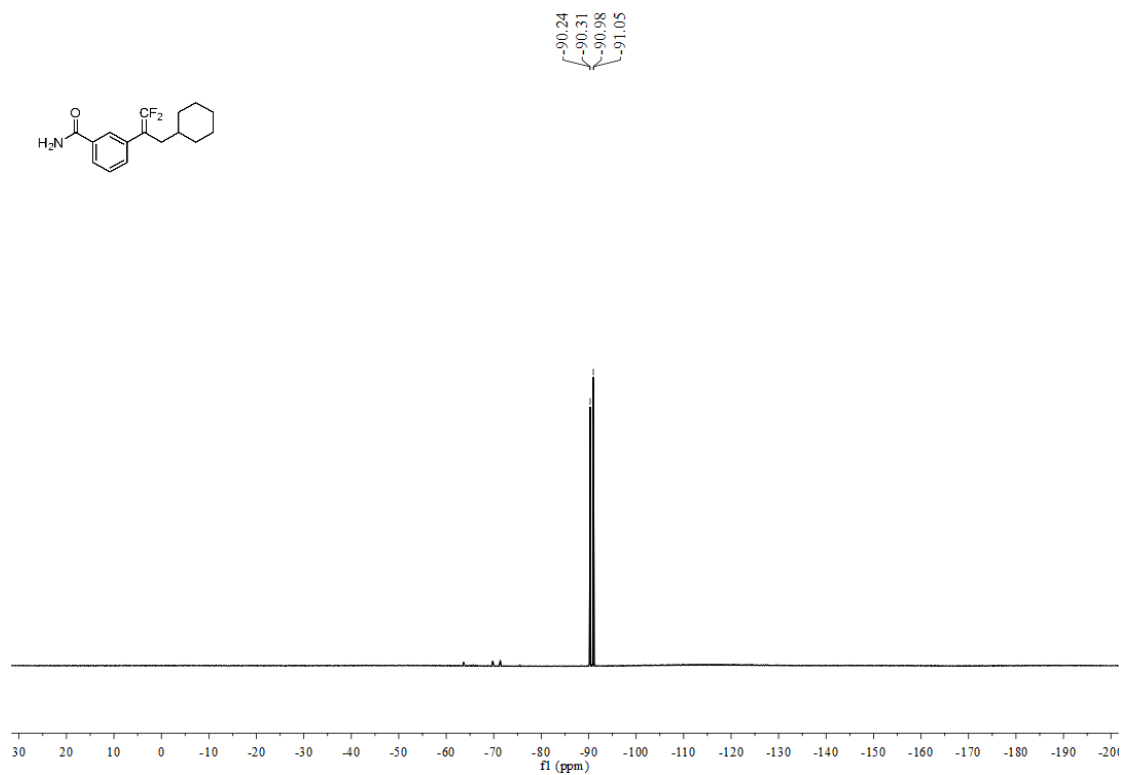

### <sup>1</sup>H NMR (600 MHz, CDCl<sub>3</sub>) spectrum of compound 36

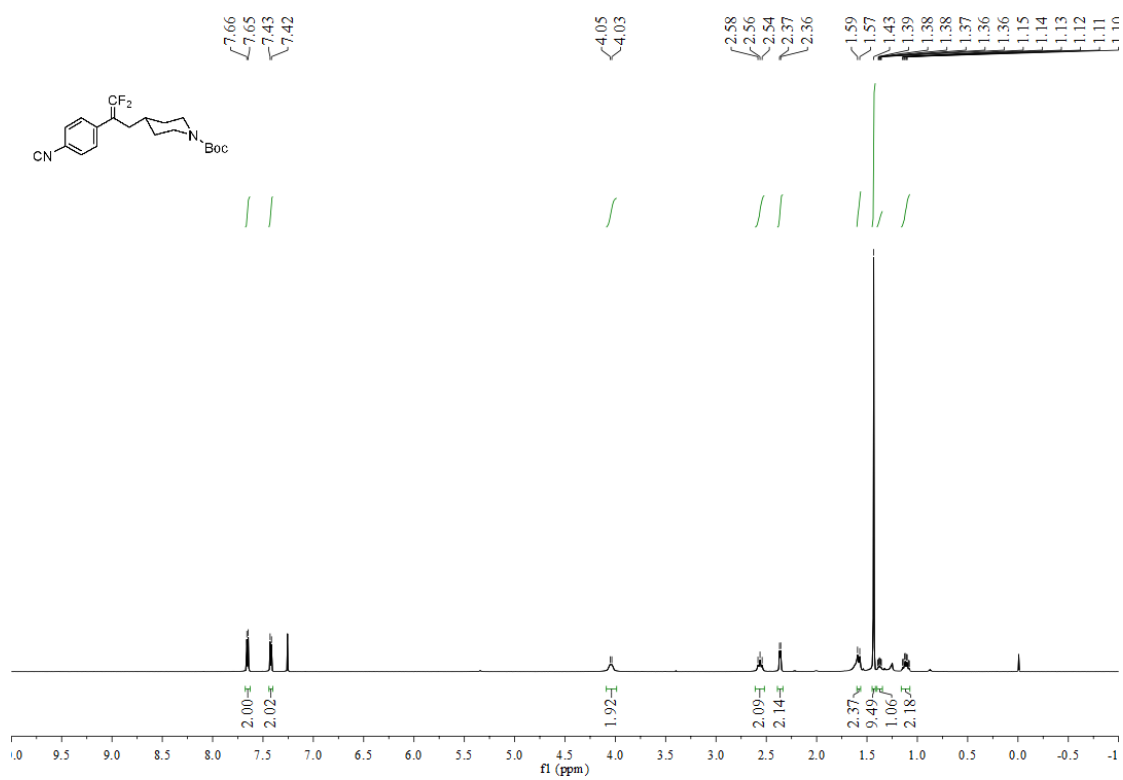

### <sup>13</sup>C NMR (151 MHz, CDCl<sub>3</sub>) spectrum of compound 36

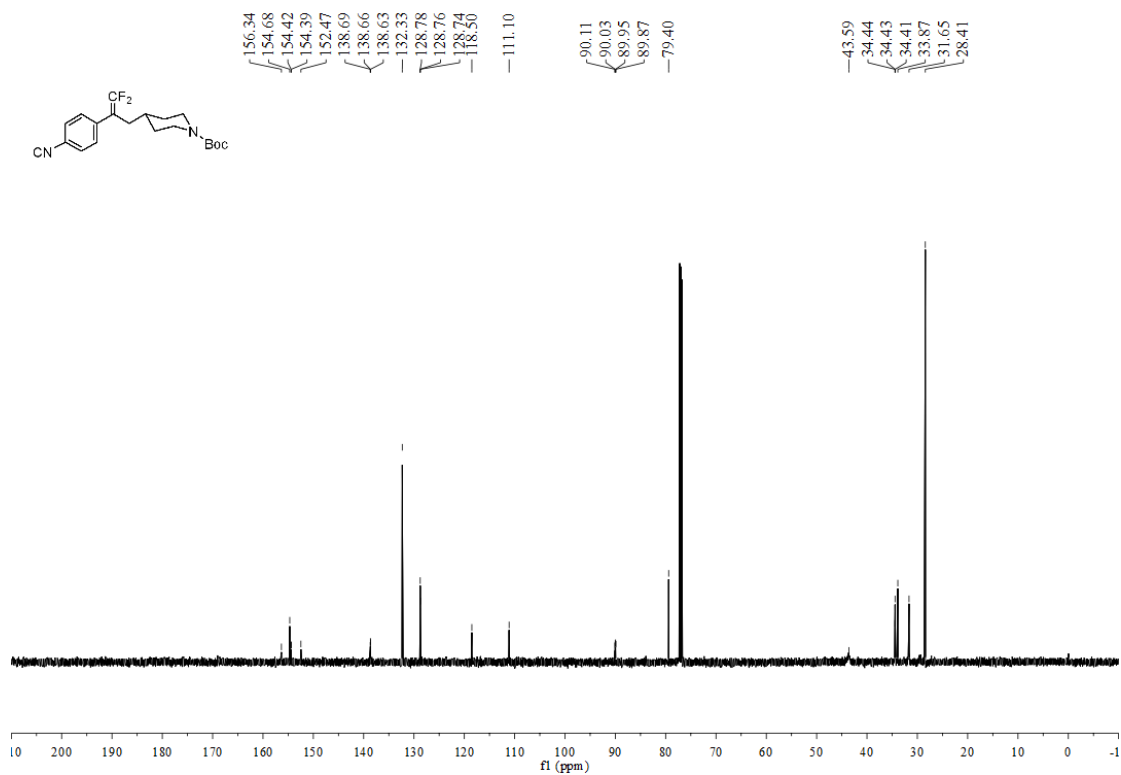

### <sup>19</sup>F NMR (564 MHz, CDCl<sub>3</sub>) spectrum of compound 36

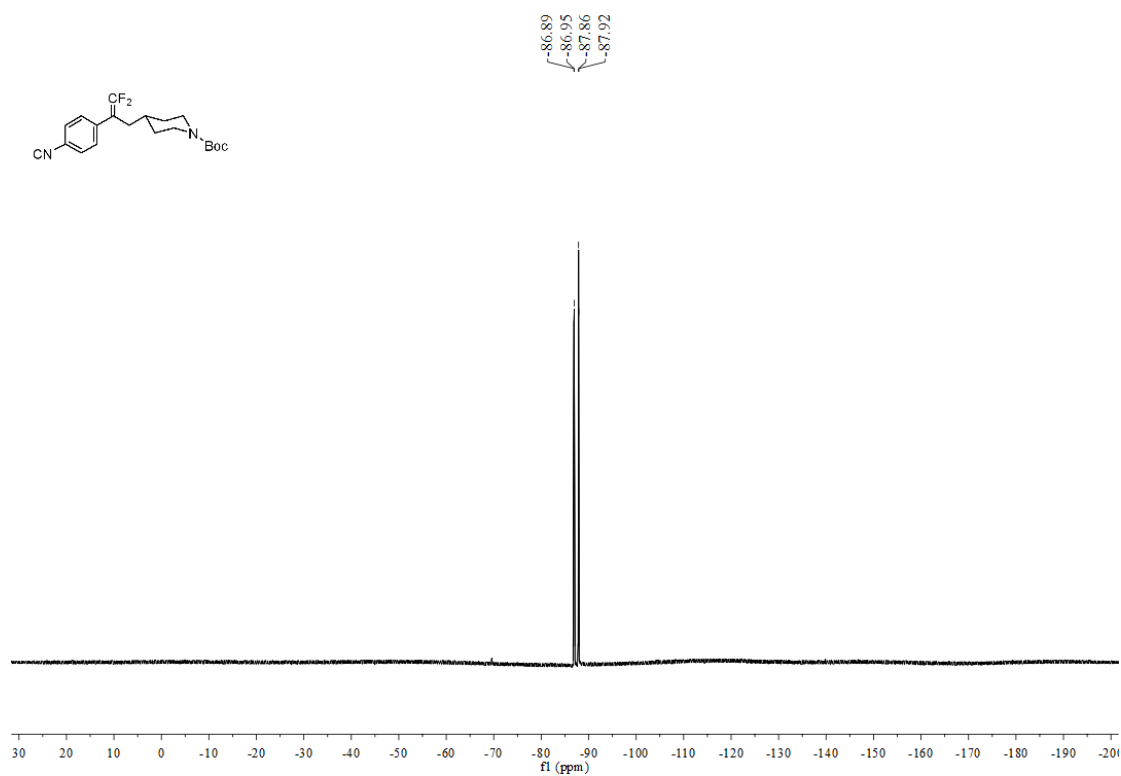

### <sup>1</sup>H NMR (600 MHz, CDCl<sub>3</sub>) spectrum of compound 37

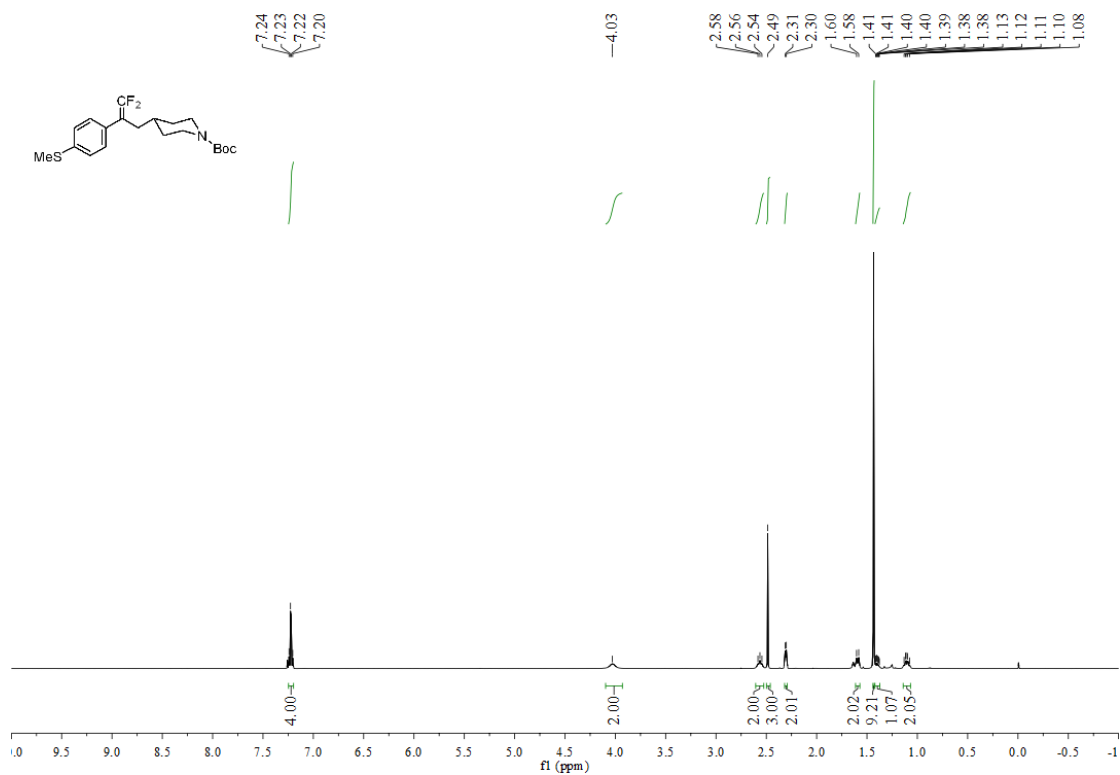

### <sup>13</sup>C NMR (151 MHz, CDCl<sub>3</sub>) spectrum of compound 37

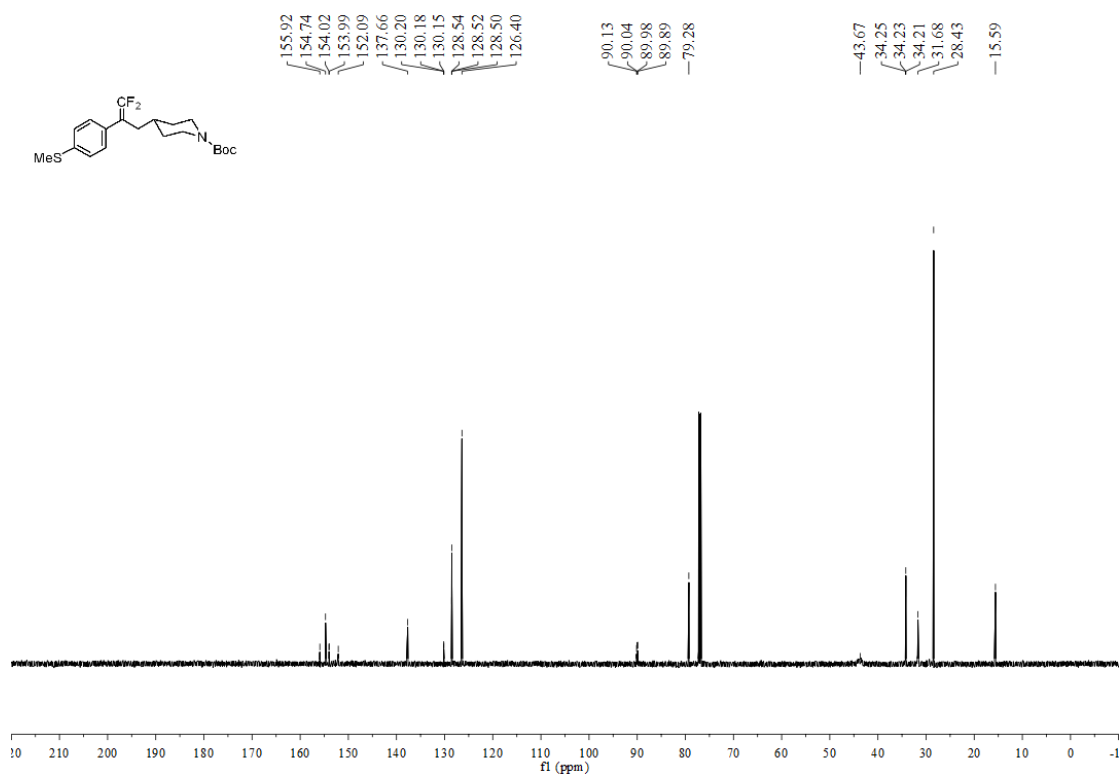

### $^{19}\text{F}$ NMR (564 MHz, $\text{CDCl}_3$ ) spectrum of compound 37

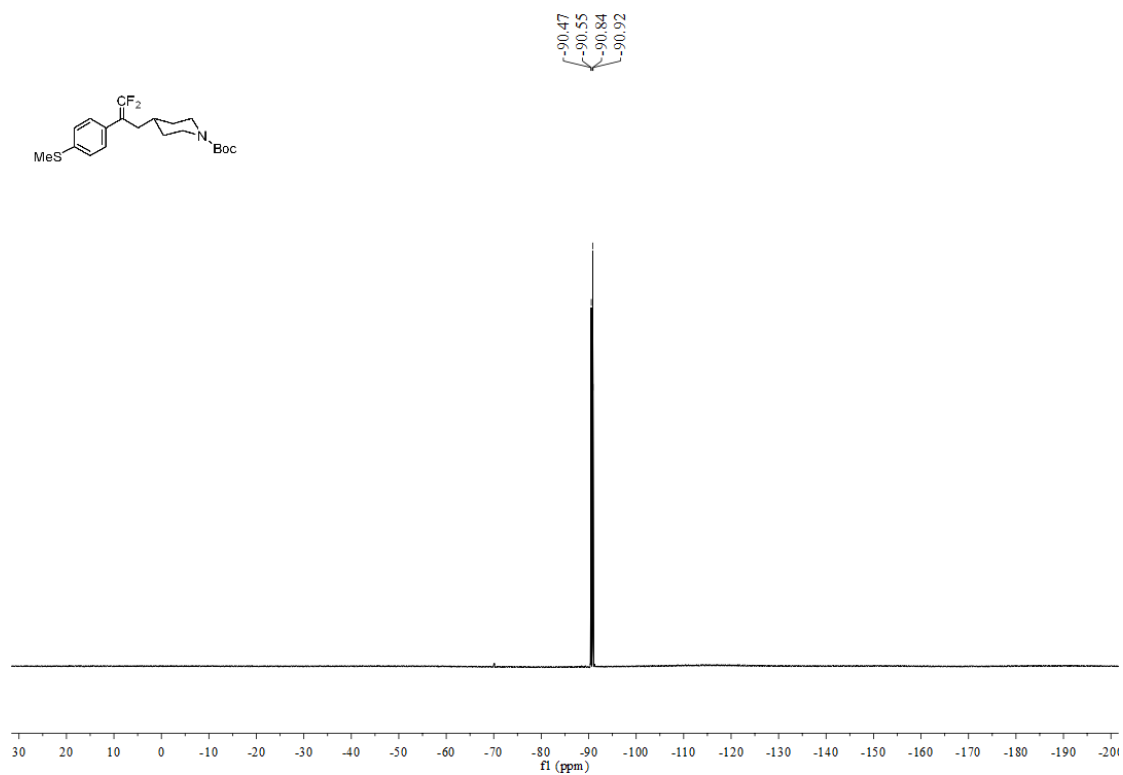

### $^1\text{H}$ NMR (600 MHz, $\text{CDCl}_3$ ) spectrum of compound 38

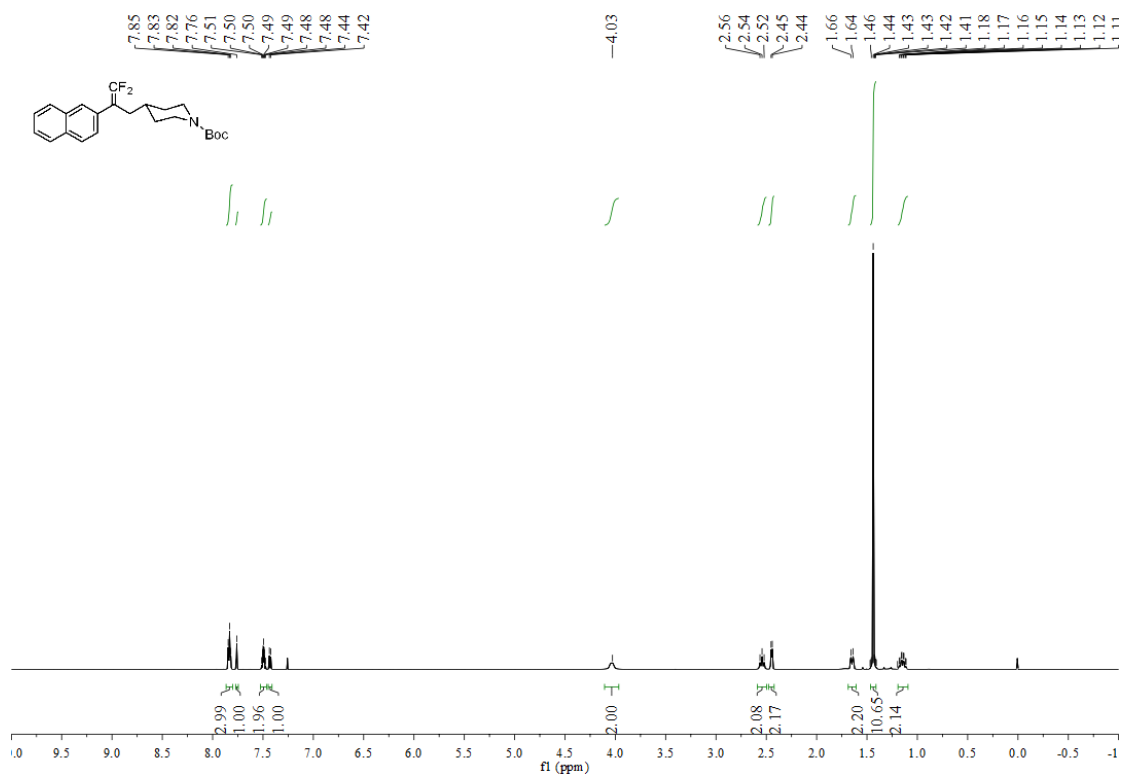

### <sup>13</sup>C NMR (151 MHz, CDCl<sub>3</sub>) spectrum of compound 38

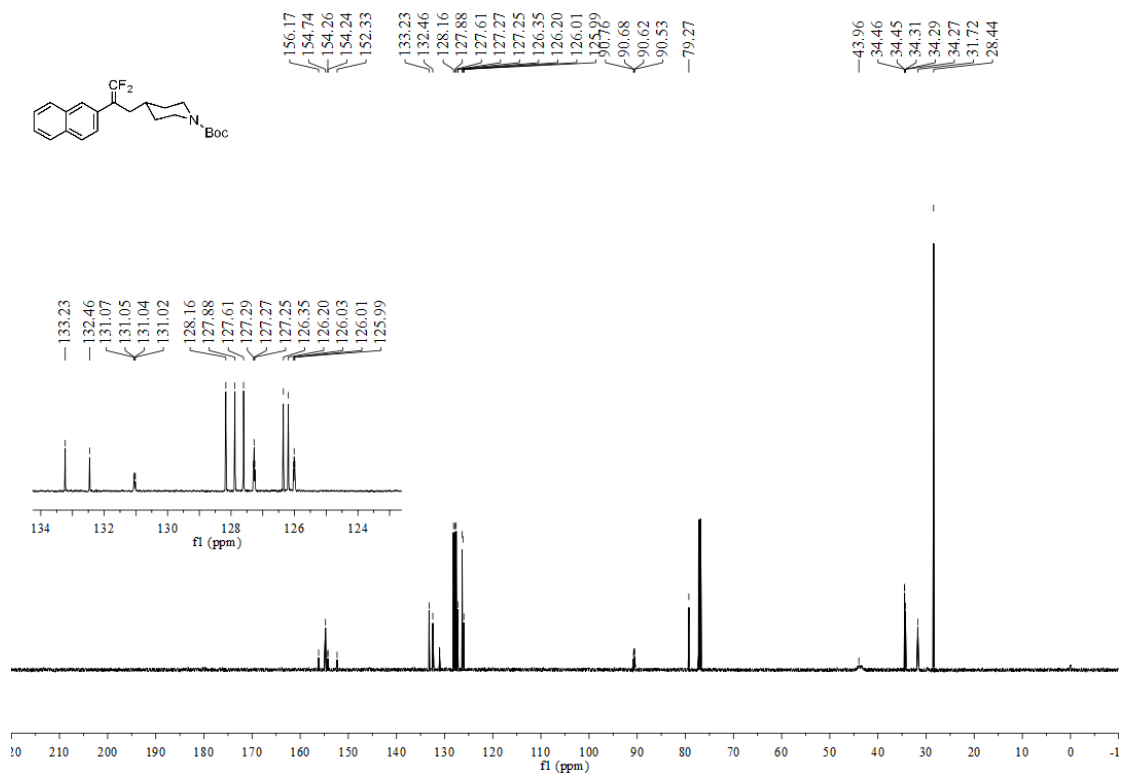

### <sup>19</sup>F NMR (564 MHz, CDCl<sub>3</sub>) spectrum of compound 38

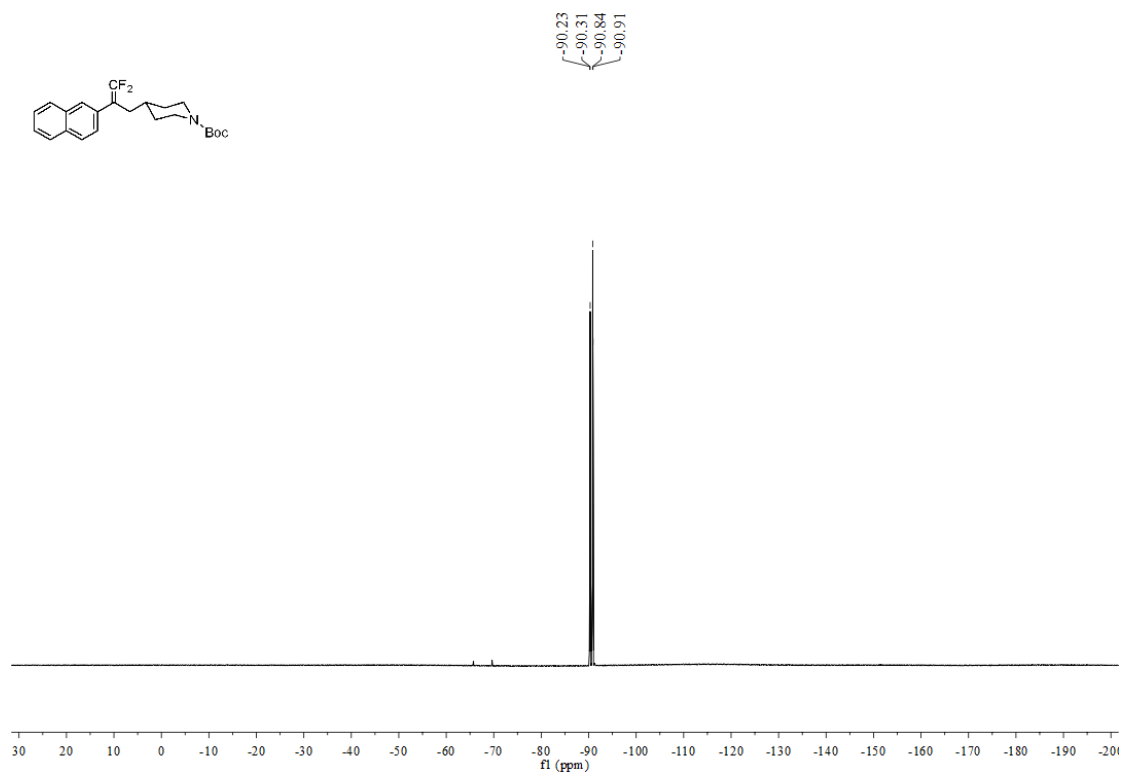

### <sup>1</sup>H NMR (600 MHz, CDCl<sub>3</sub>) spectrum of compound 39

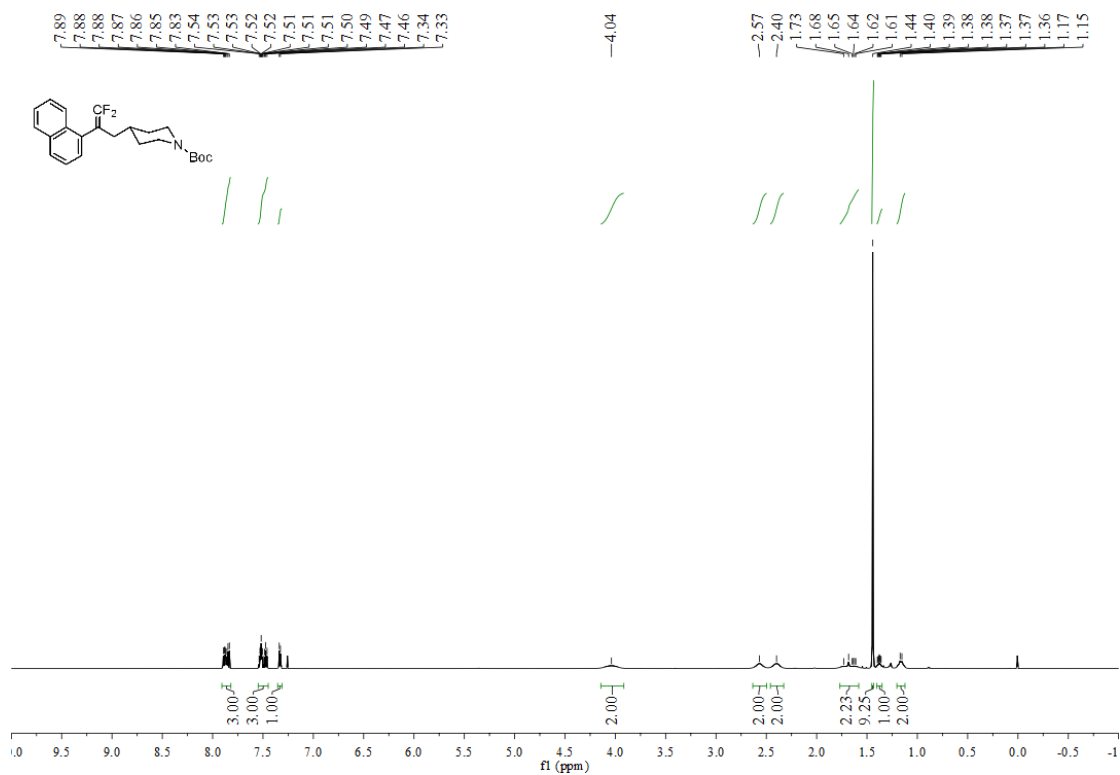

### <sup>13</sup>C NMR (151 MHz, CDCl<sub>3</sub>) spectrum of compound 39

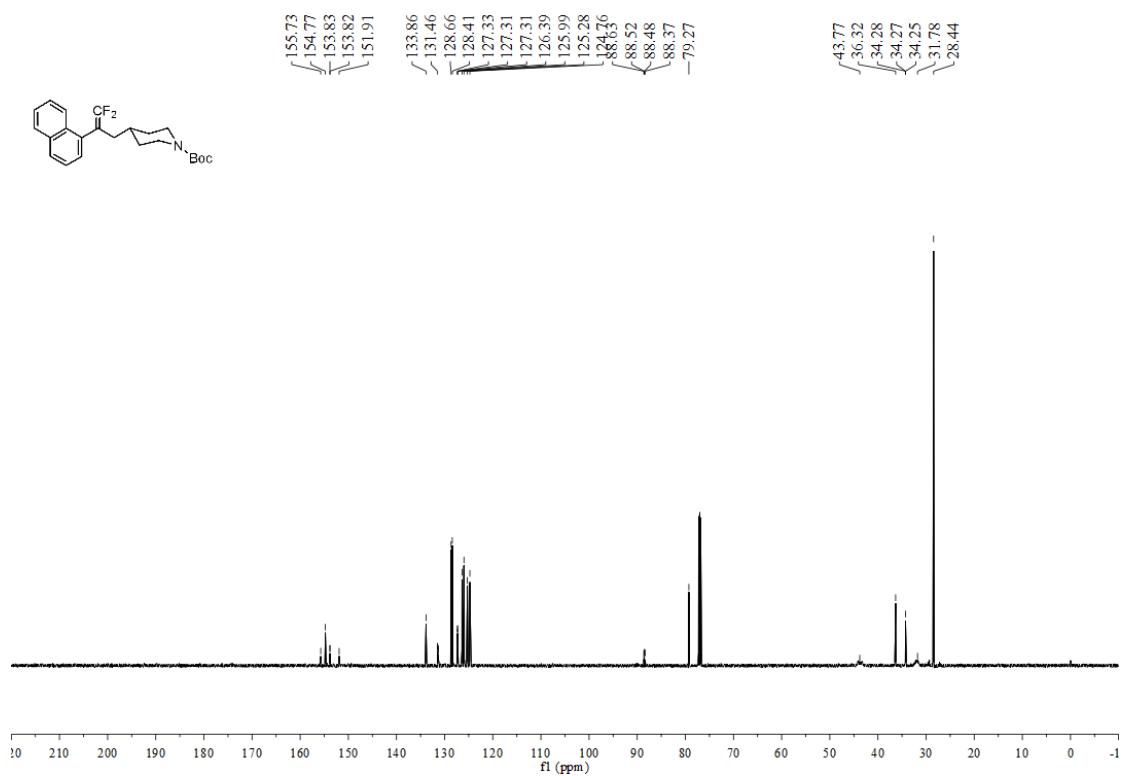

### $^{19}\text{F}$ NMR (564 MHz, $\text{CDCl}_3$ ) spectrum of compound 39

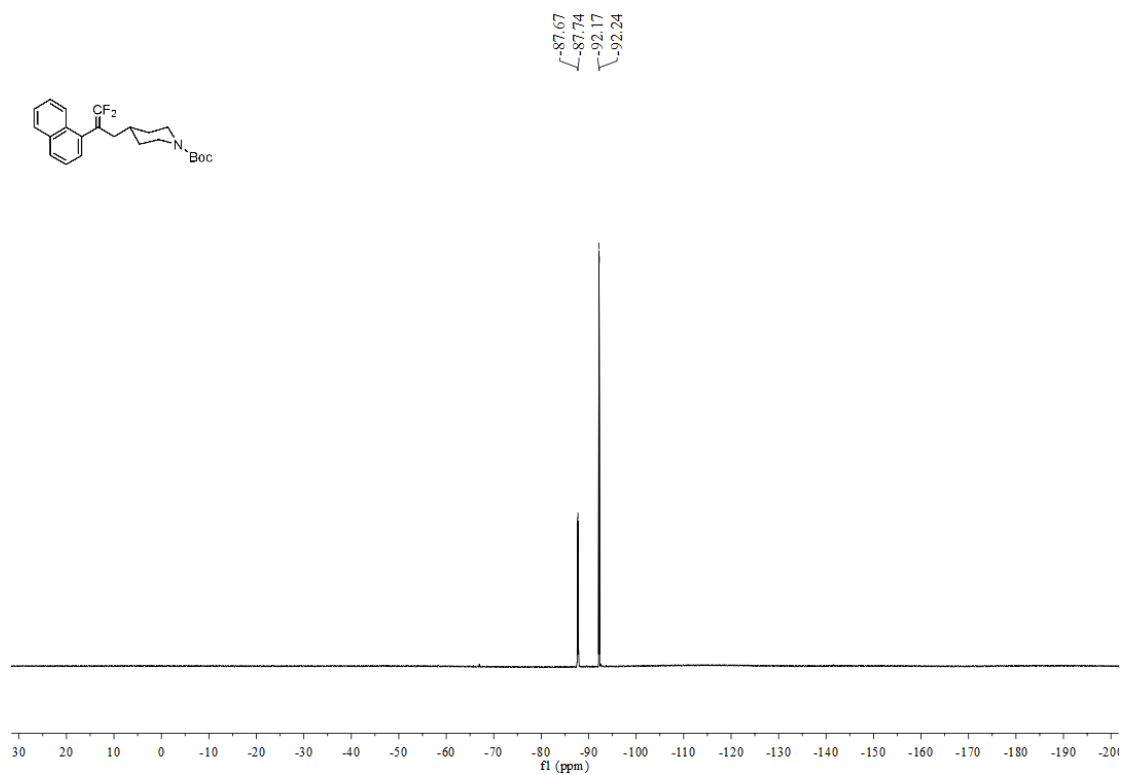

### $^1\text{H}$ NMR (600 MHz, $\text{CDCl}_3$ ) spectrum of compound 40

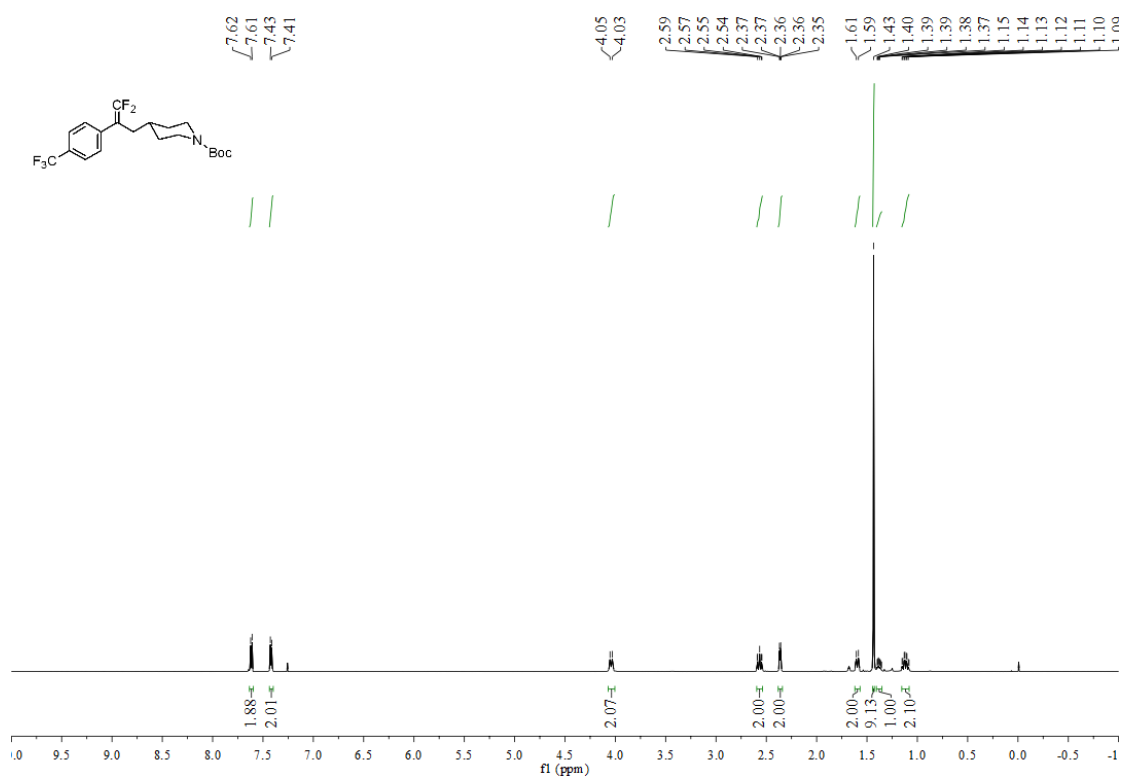

### $^{13}\text{C}$ NMR (151 MHz, $\text{CDCl}_3$ ) spectrum of compound 40

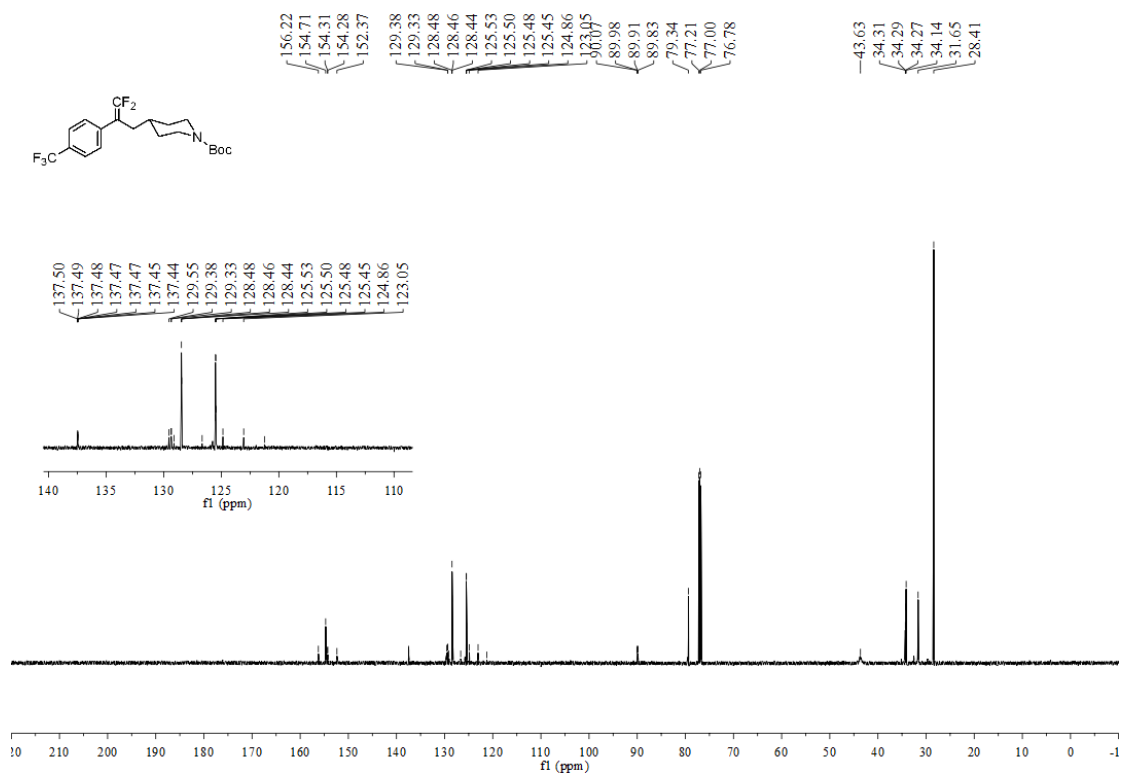

### $^{19}\text{F}$ NMR (564 MHz, $\text{CDCl}_3$ ) spectrum of compound 40

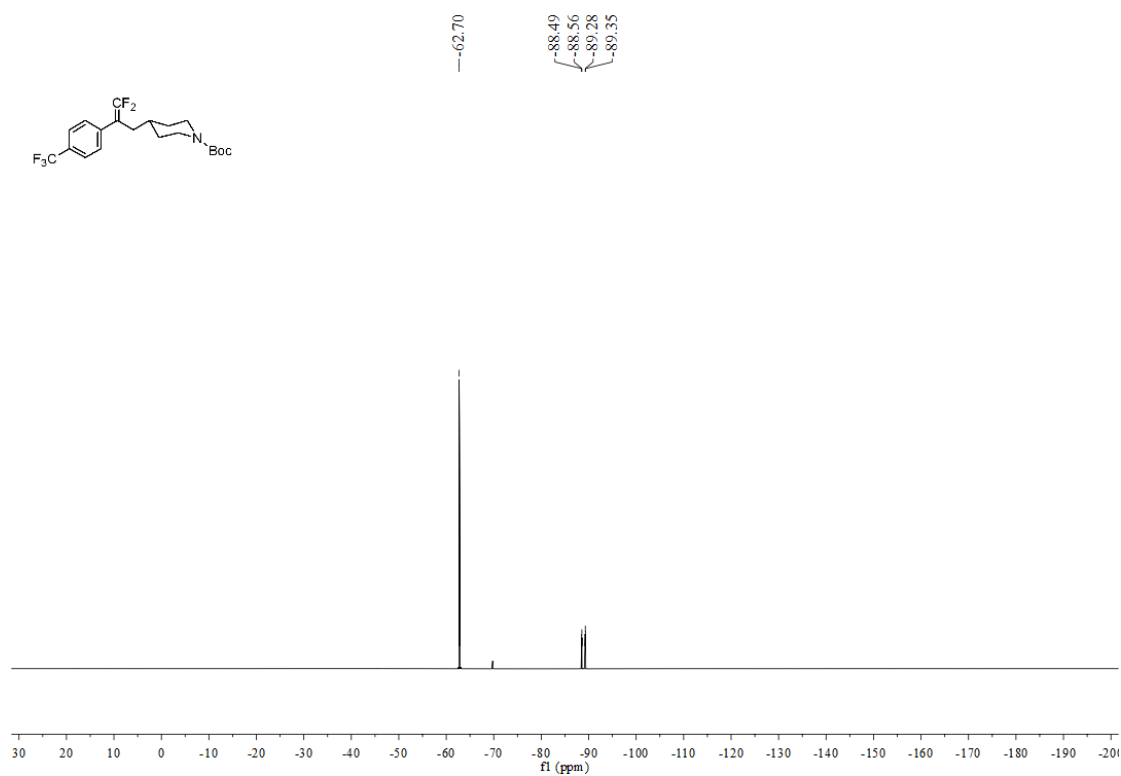



### <sup>1</sup>H NMR (600 MHz, CDCl<sub>3</sub>) spectrum of compound 41

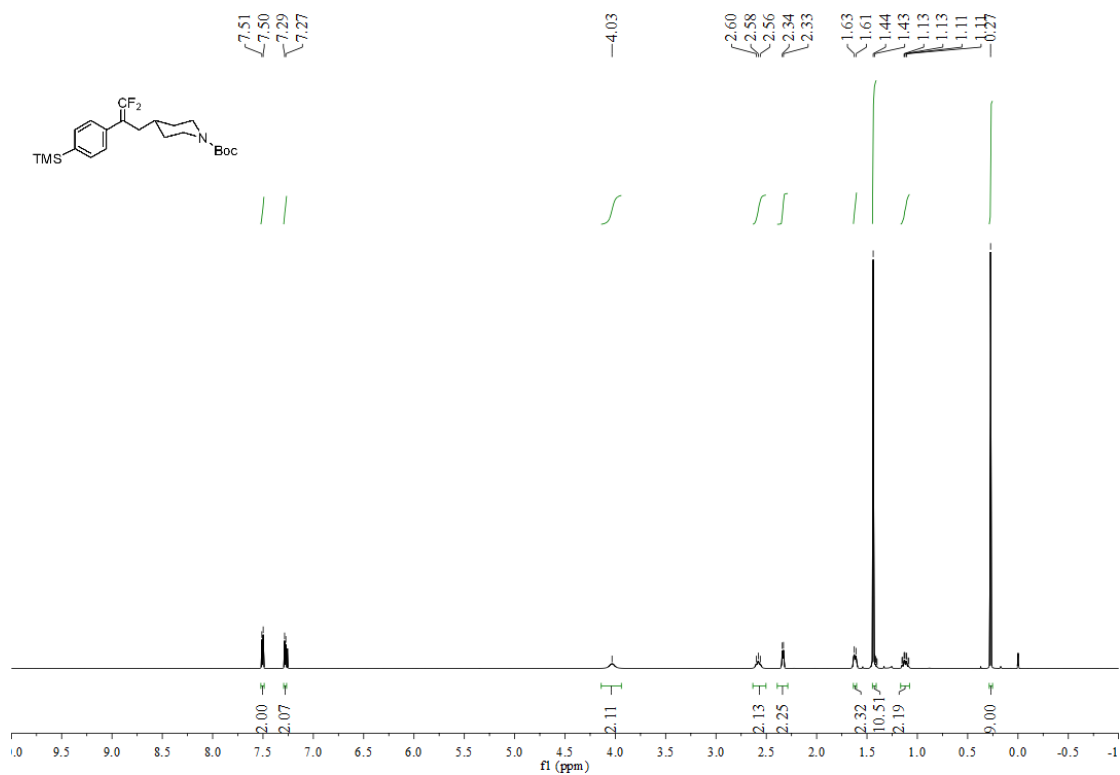

### <sup>13</sup>C NMR (151 MHz, CDCl<sub>3</sub>) spectrum of compound 41

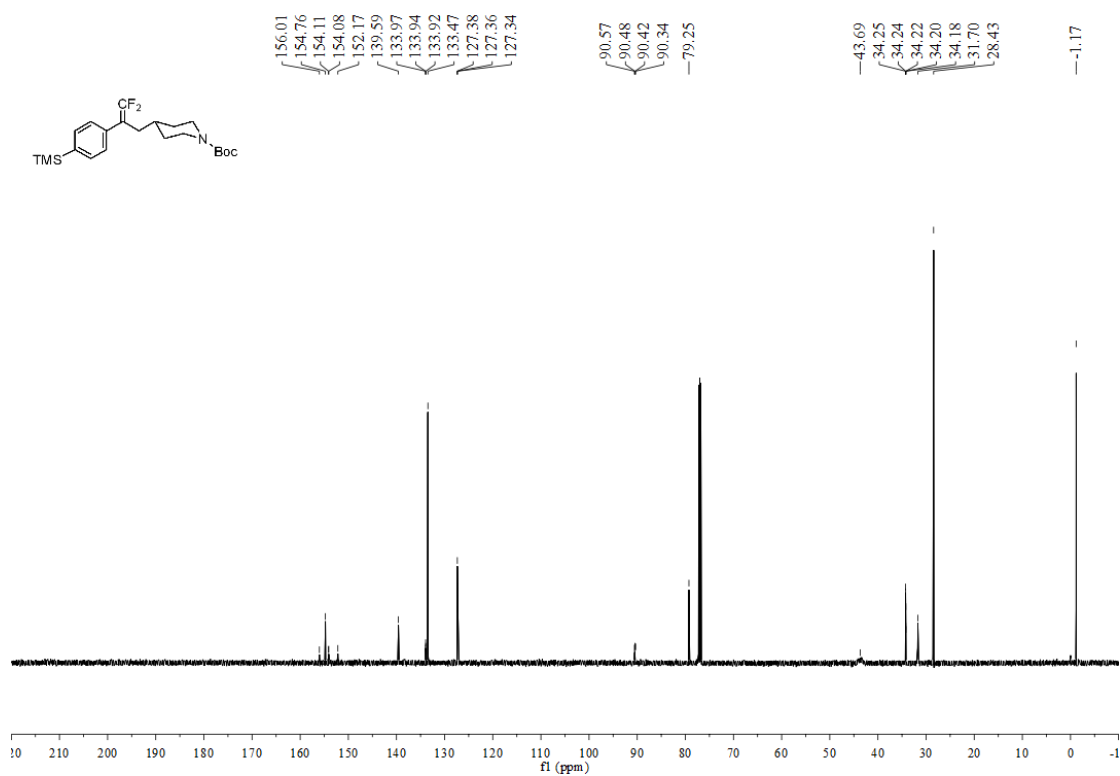

### $^{19}\text{F}$ NMR (564 MHz, $\text{CDCl}_3$ ) spectrum of compound 41

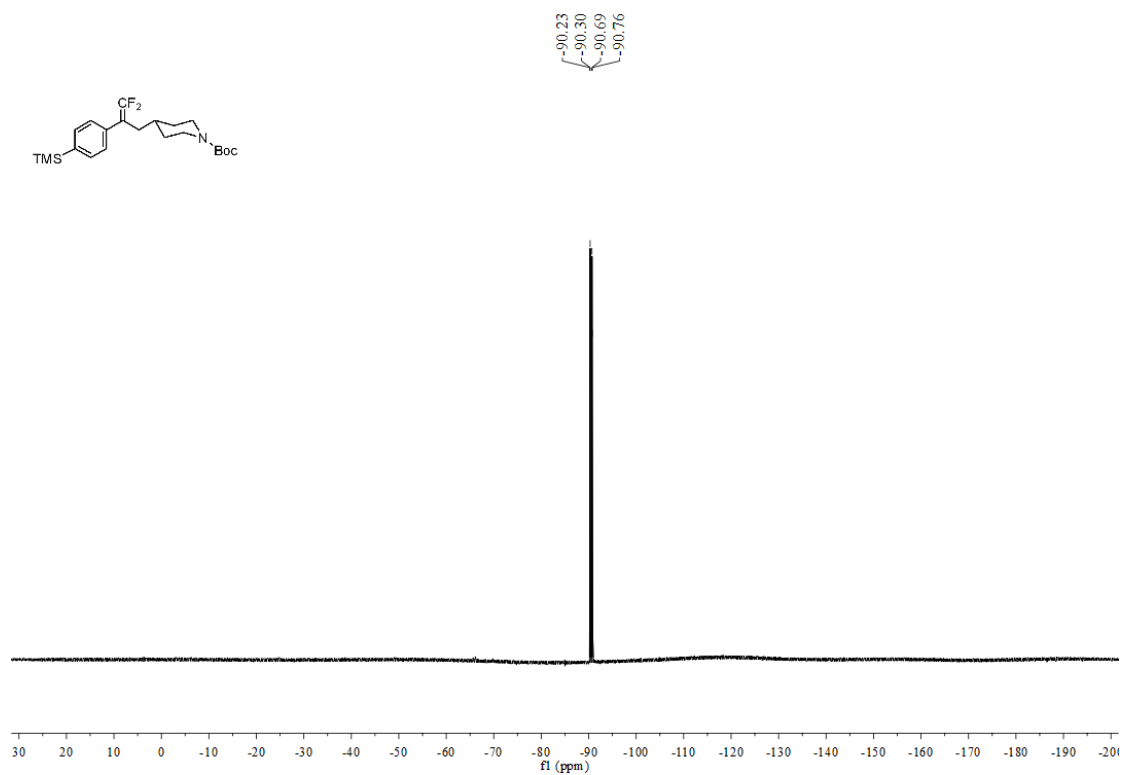

### $^1\text{H}$ NMR (600 MHz, $\text{CDCl}_3$ ) spectrum of compound 42

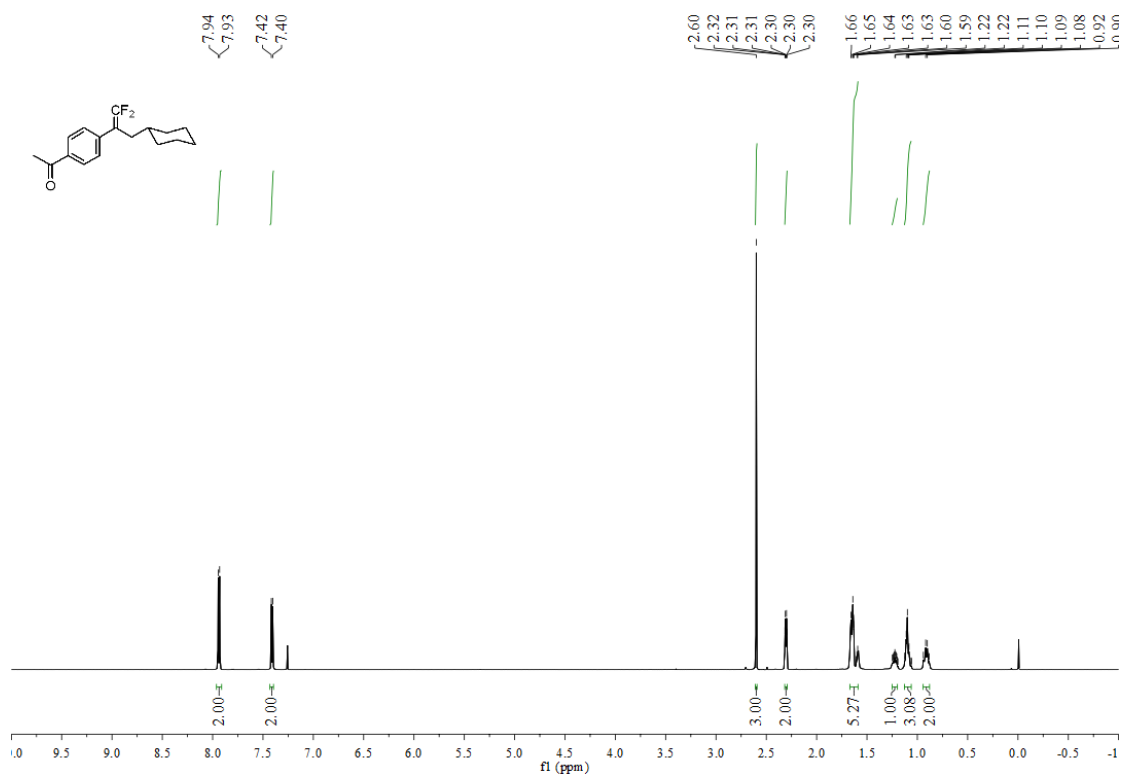

### $^{13}\text{C}$ NMR (151 MHz, $\text{CDCl}_3$ ) spectrum of compound 42

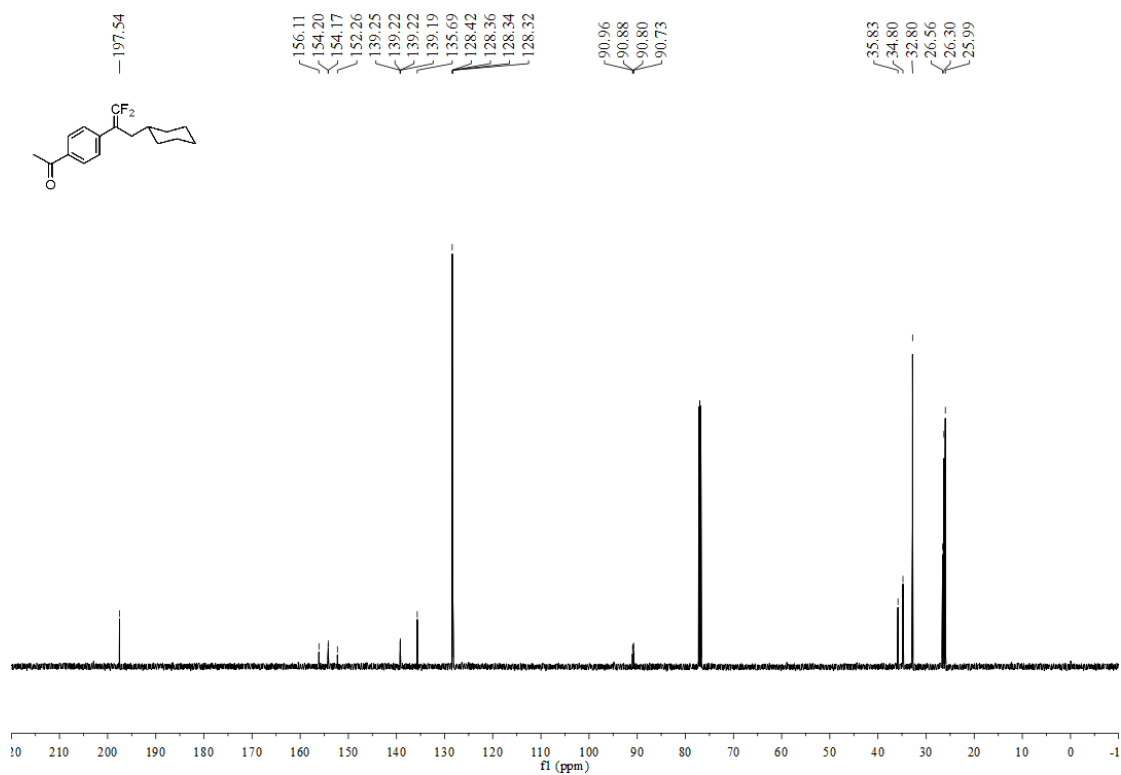

### $^{19}\text{F}$ NMR (564 MHz, $\text{CDCl}_3$ ) spectrum of compound 42

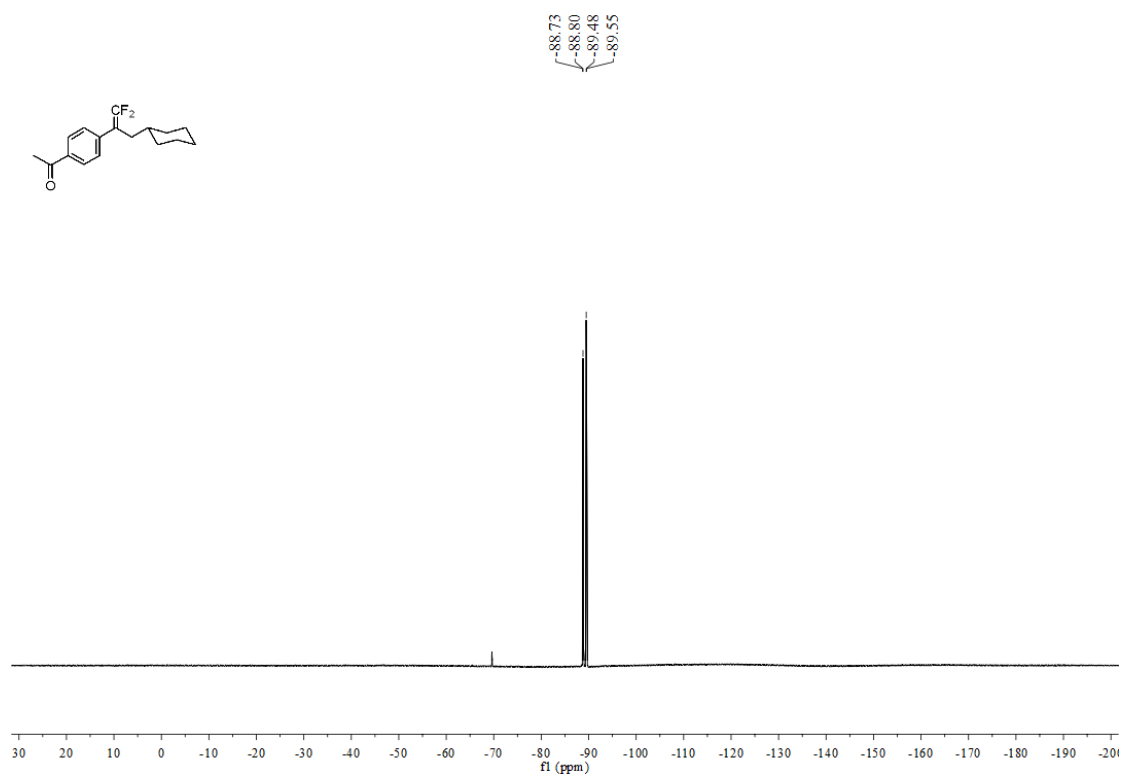

### <sup>1</sup>H NMR (600 MHz, CDCl<sub>3</sub>) spectrum of compound 43

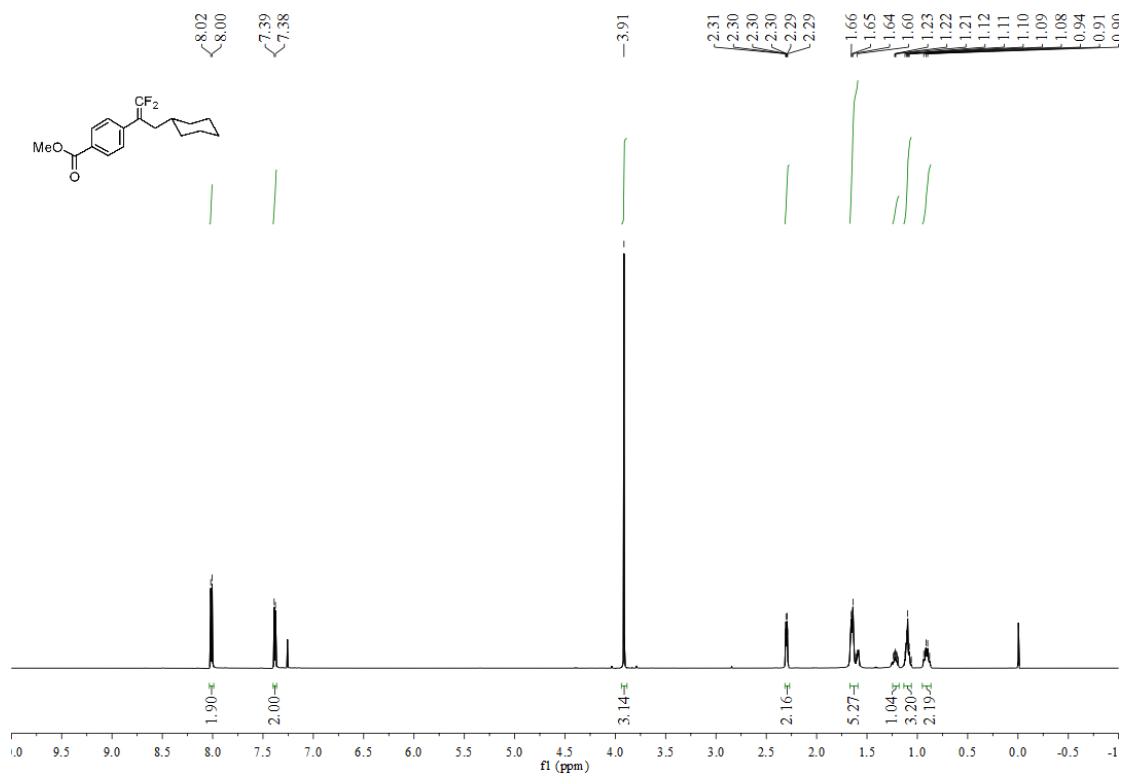

### <sup>13</sup>C NMR (151 MHz, CDCl<sub>3</sub>) spectrum of compound 43

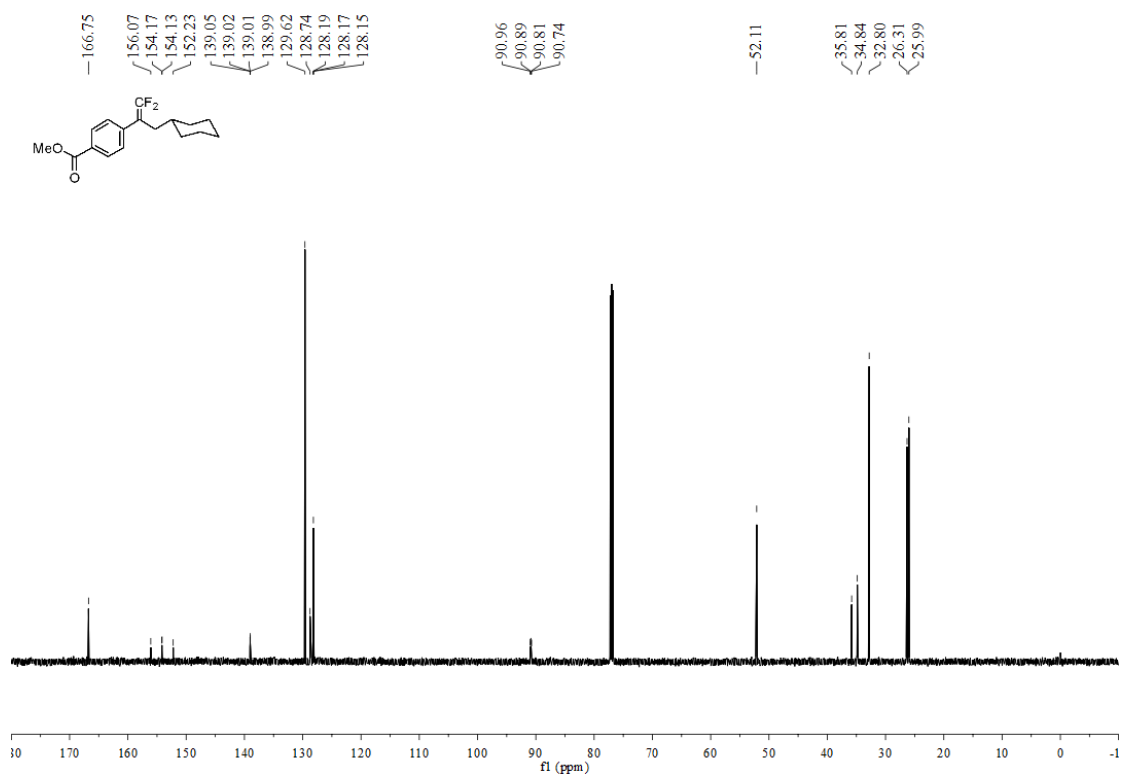

### $^{19}\text{F}$ NMR (564 MHz, $\text{CDCl}_3$ ) spectrum of compound 43

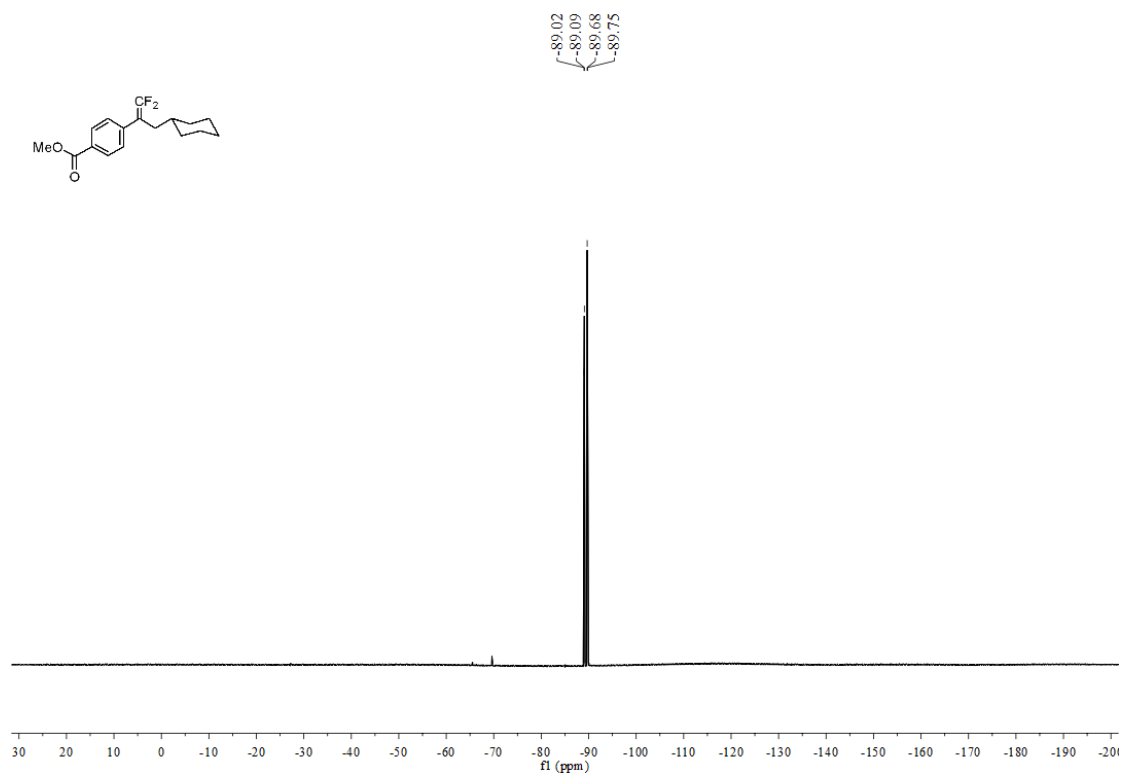

### $^1\text{H}$ NMR (600 MHz, $\text{CDCl}_3$ ) spectrum of compound 44

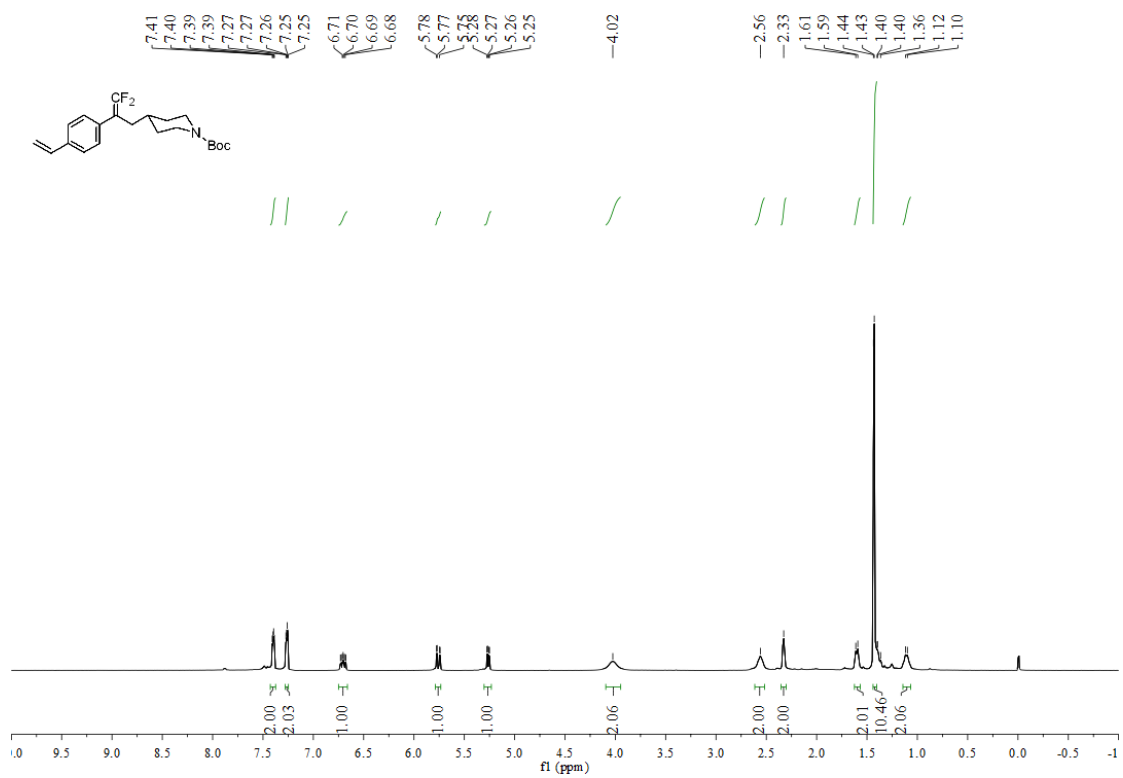

### <sup>13</sup>C NMR (151 MHz, CDCl<sub>3</sub>) spectrum of compound 44

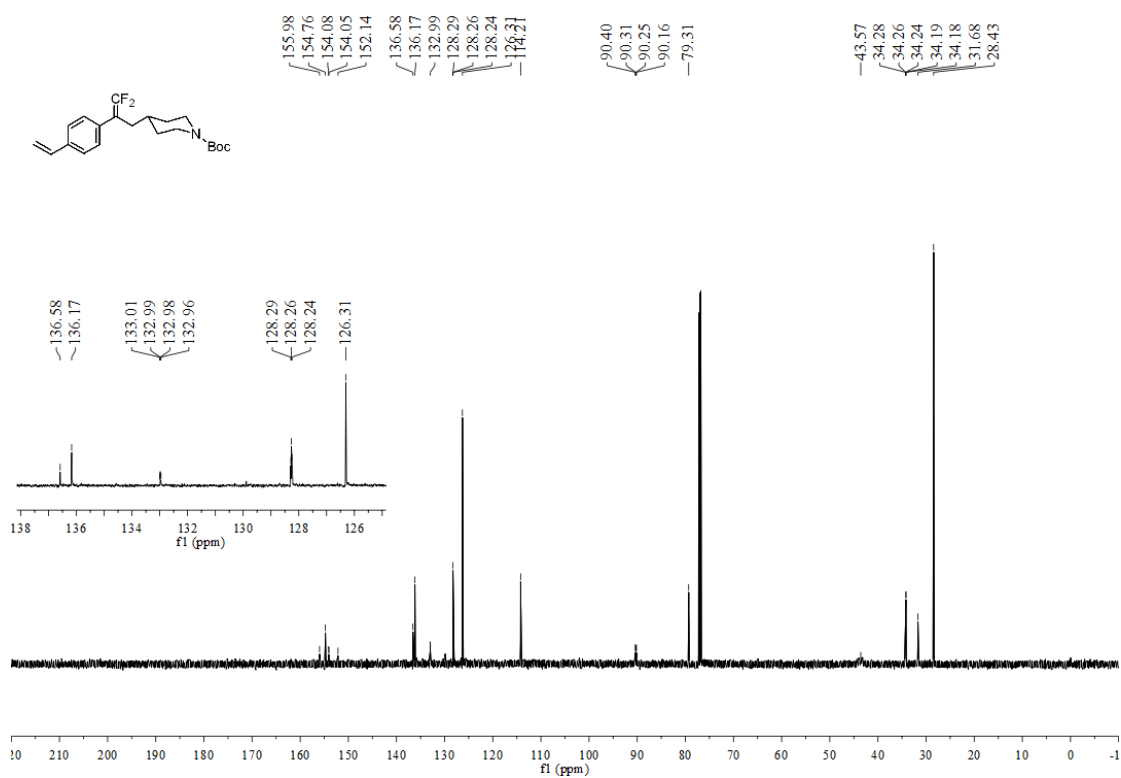

### <sup>19</sup>F NMR (564 MHz, CDCl<sub>3</sub>) spectrum of compound 44

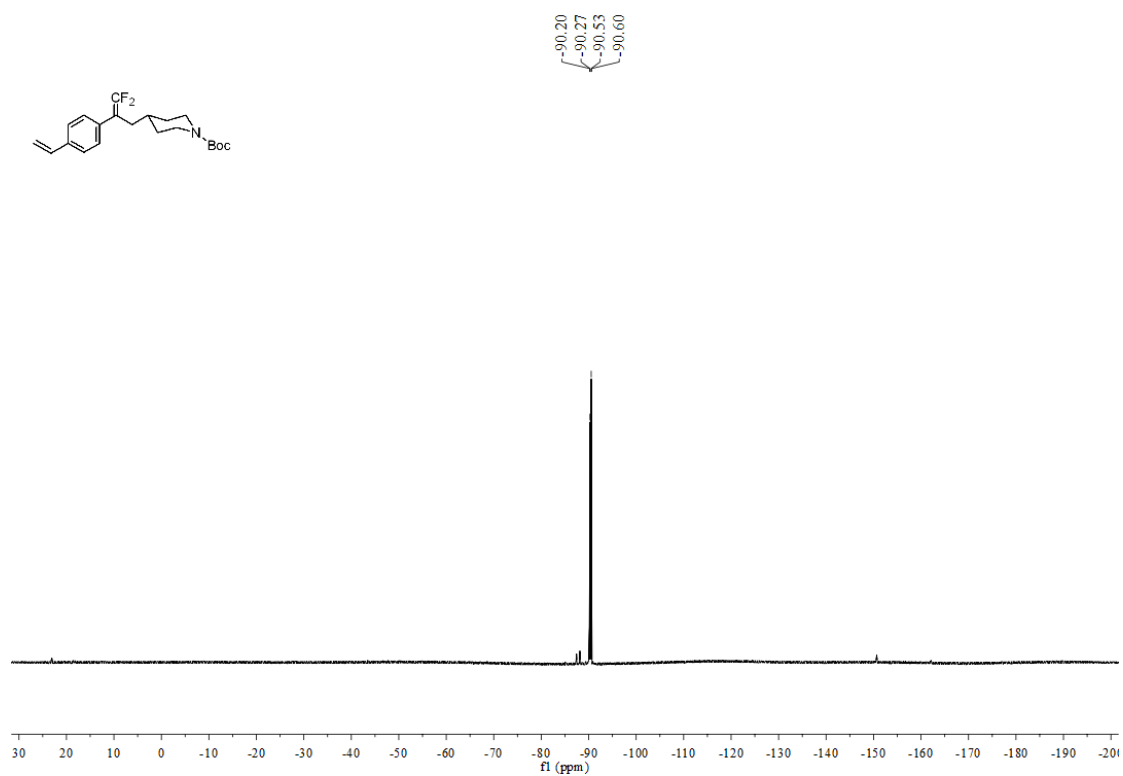

### <sup>1</sup>H NMR (600 MHz, CDCl<sub>3</sub>) spectrum of compound 45

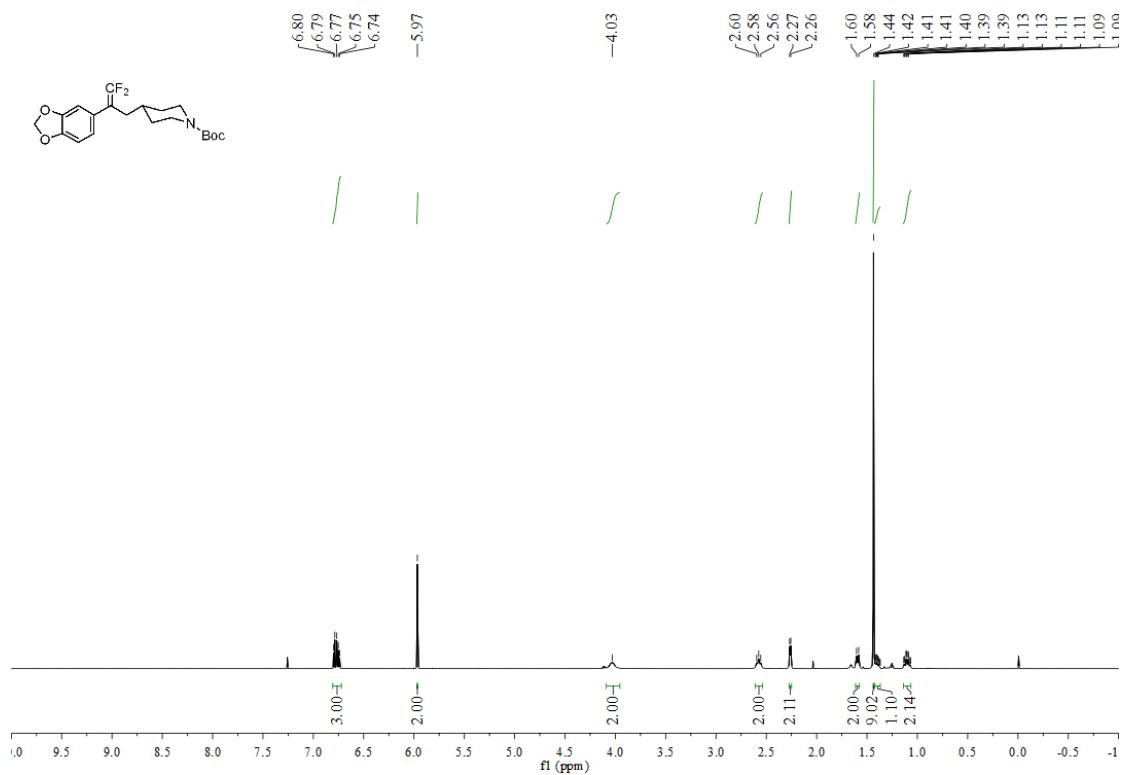

### <sup>13</sup>C NMR (151 MHz, CDCl<sub>3</sub>) spectrum of compound 45

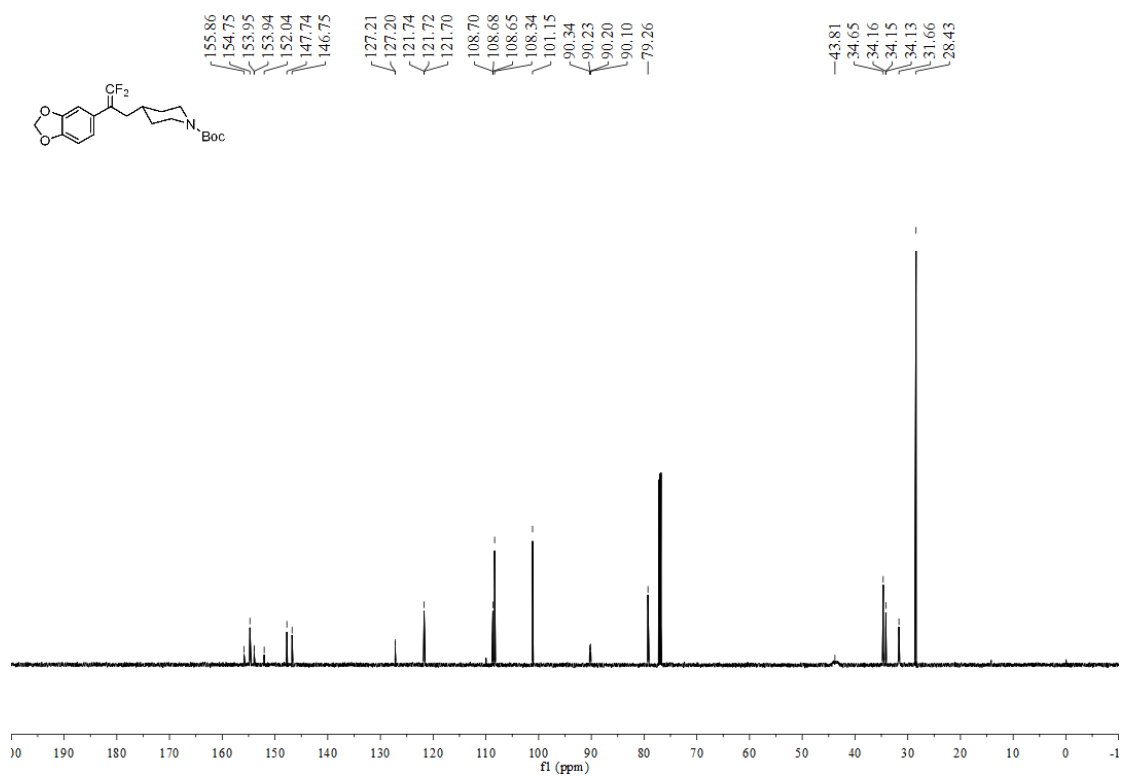

### <sup>19</sup>F NMR (564 MHz, CDCl<sub>3</sub>) spectrum of compound 45

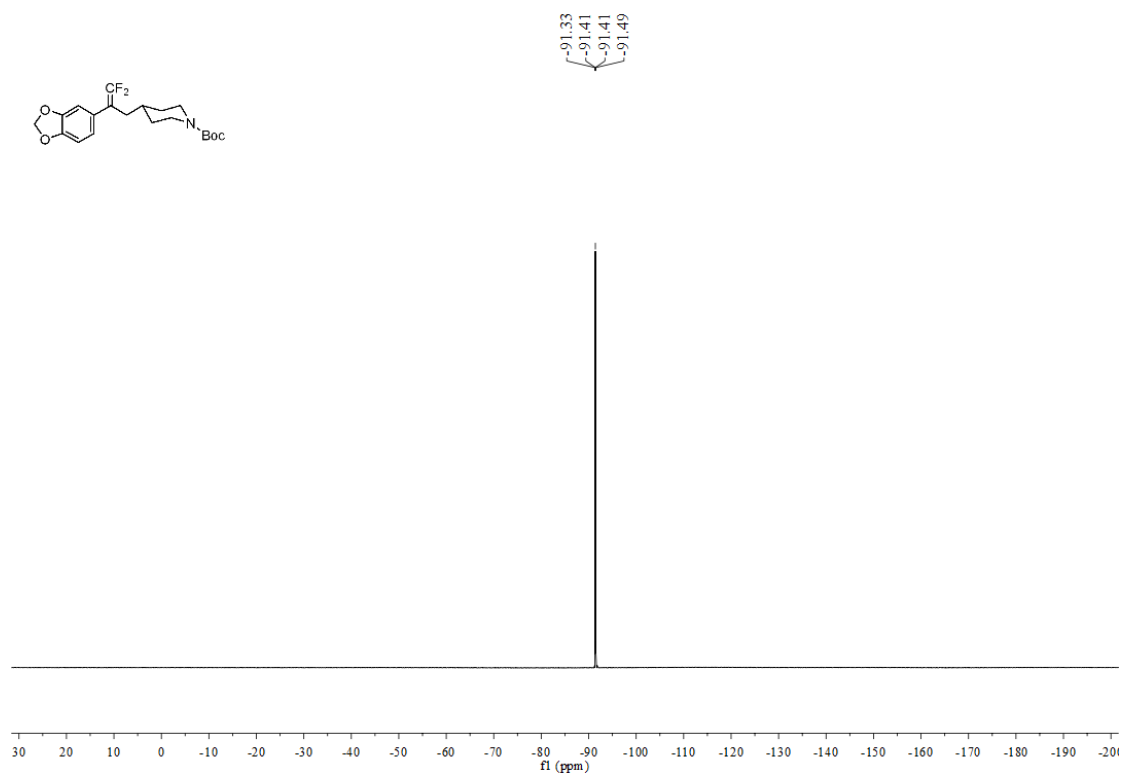

### <sup>1</sup>H NMR (600 MHz, CDCl<sub>3</sub>) spectrum of compound 46

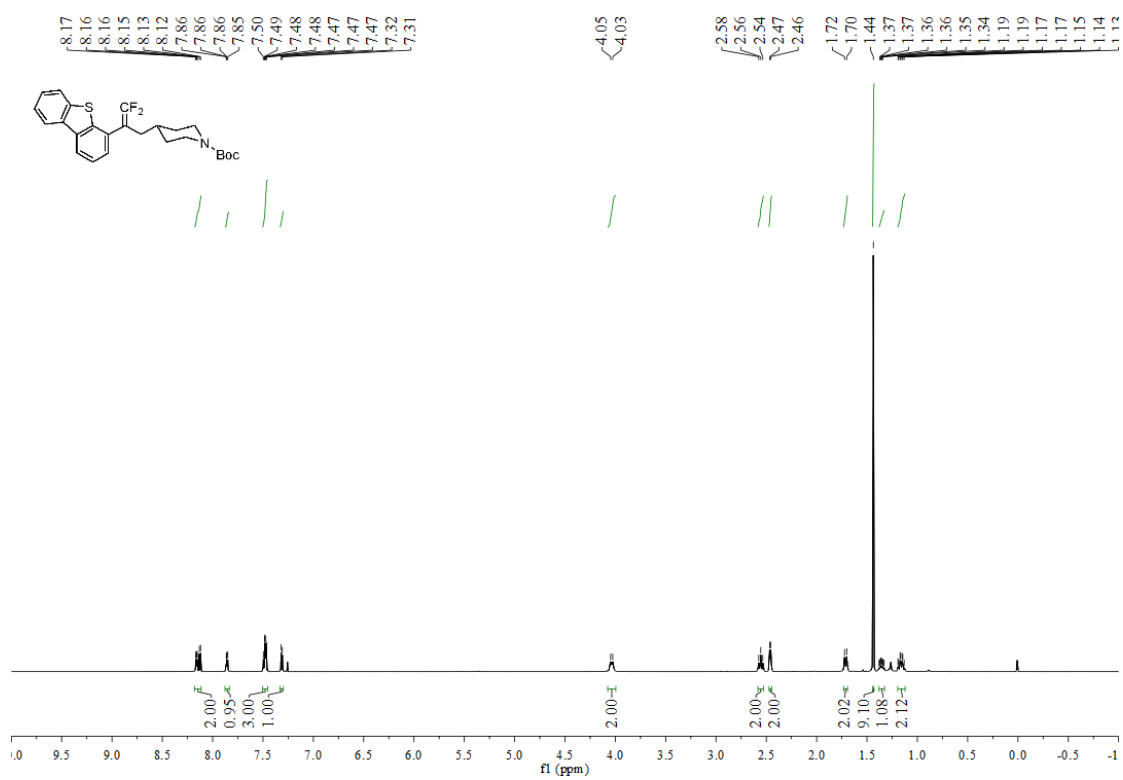



**<sup>13</sup>C NMR (151 MHz, CDCl<sub>3</sub>) spectrum of compound 46**

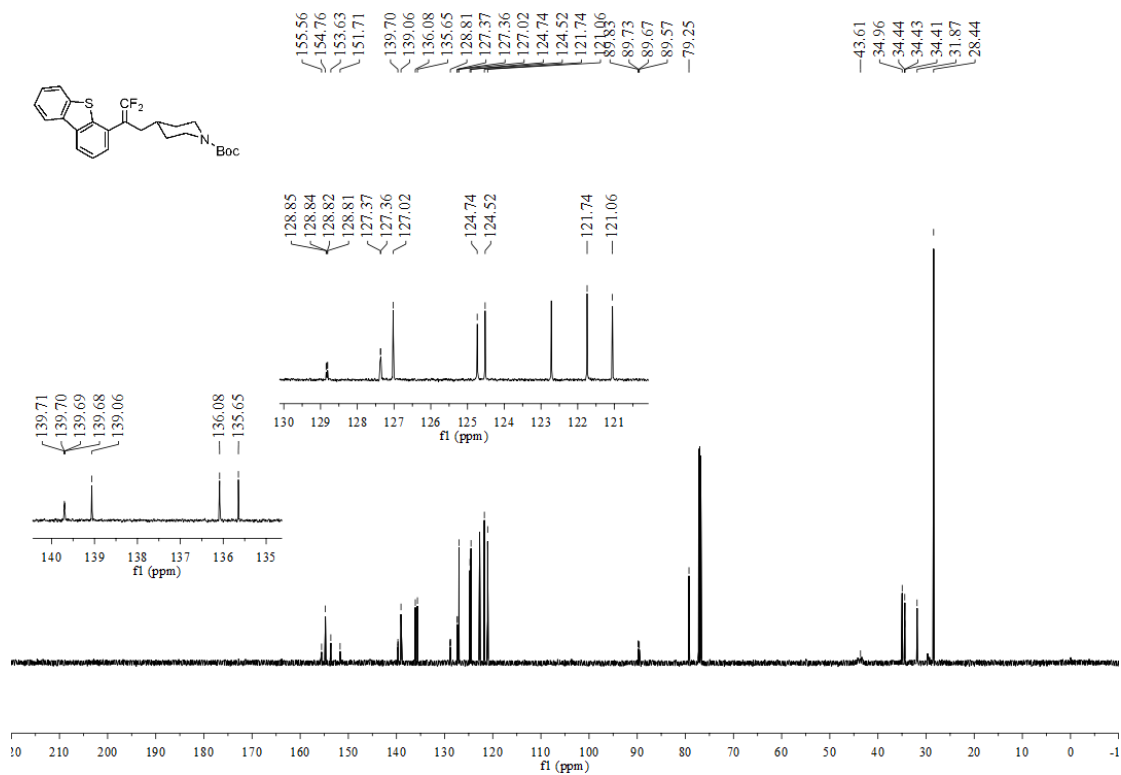

**<sup>19</sup>F NMR (564 MHz, CDCl<sub>3</sub>) spectrum of compound 46**

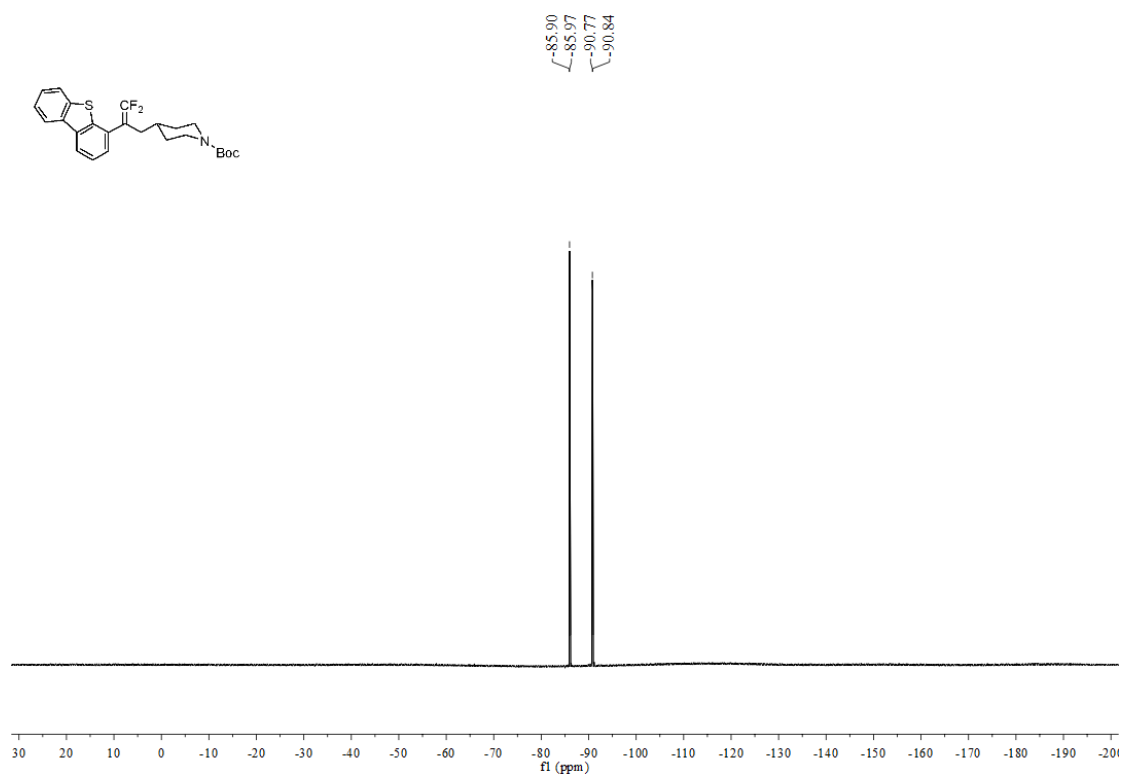

### <sup>1</sup>H NMR (600 MHz, CDCl<sub>3</sub>) spectrum of compound 47

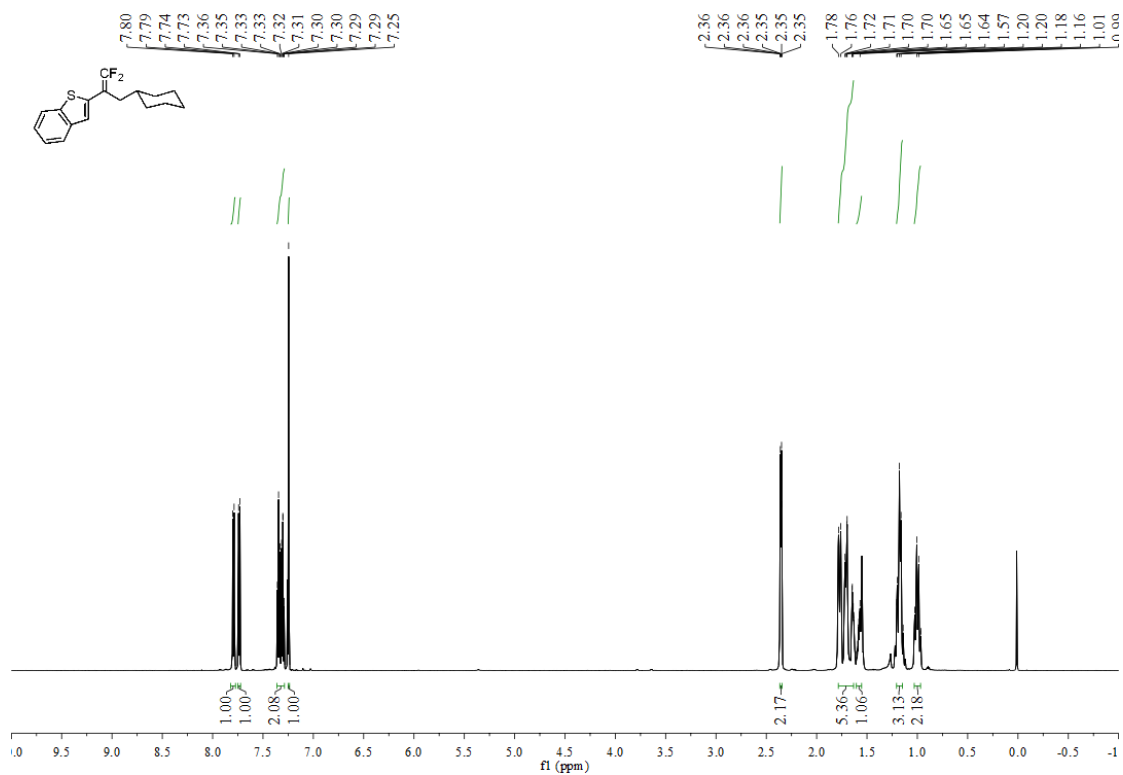

### <sup>13</sup>C NMR (151 MHz, CDCl<sub>3</sub>) spectrum of compound 47

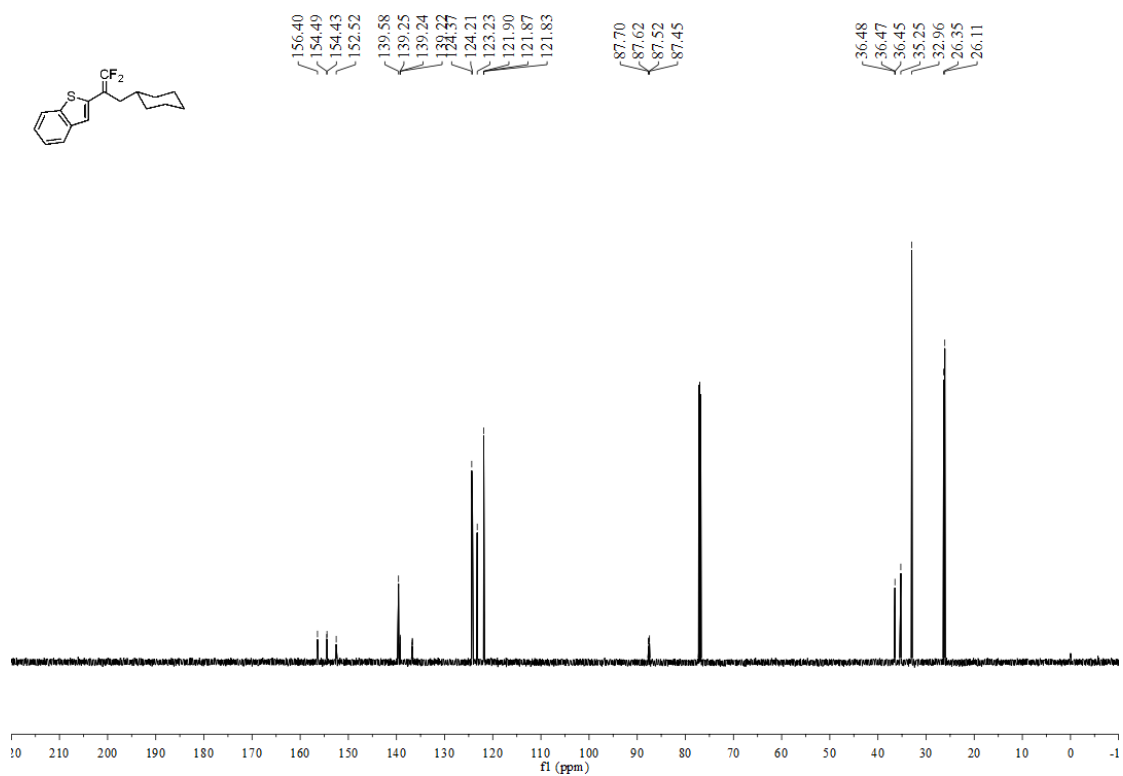

### $^{19}\text{F}$ NMR (564 MHz, $\text{CDCl}_3$ ) spectrum of compound 47

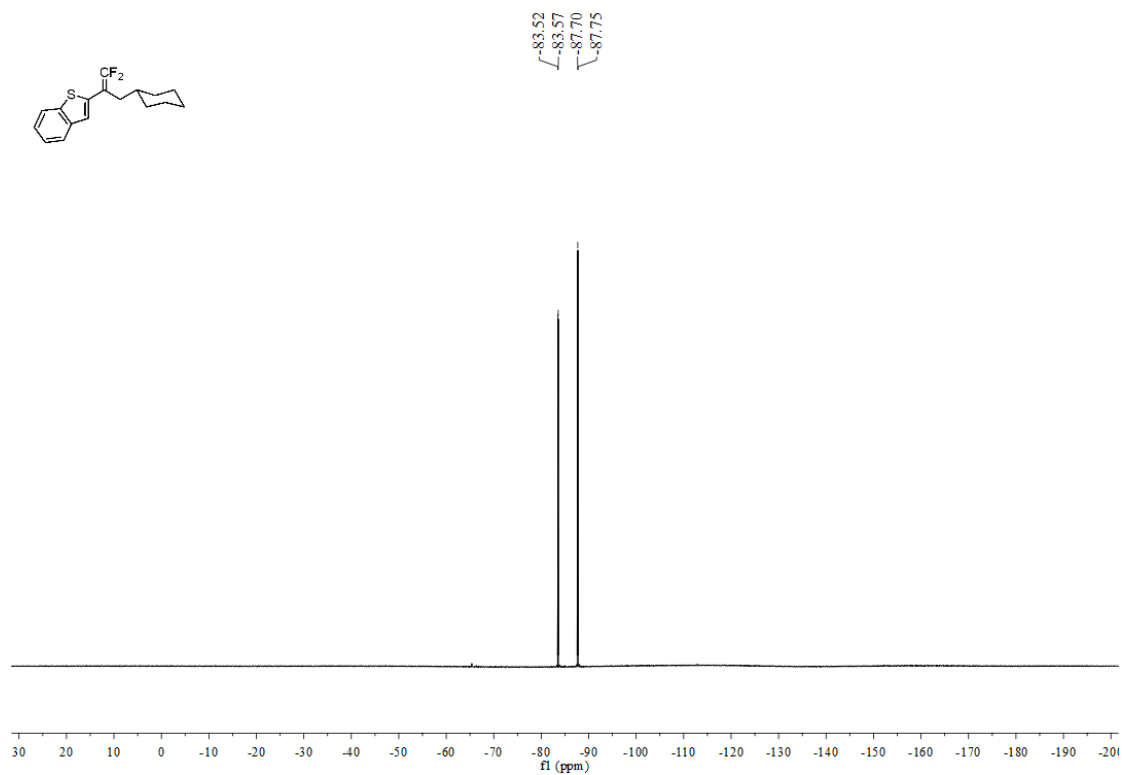

### $^1\text{H}$ NMR (600 MHz, $\text{CDCl}_3$ ) spectrum of compound 48

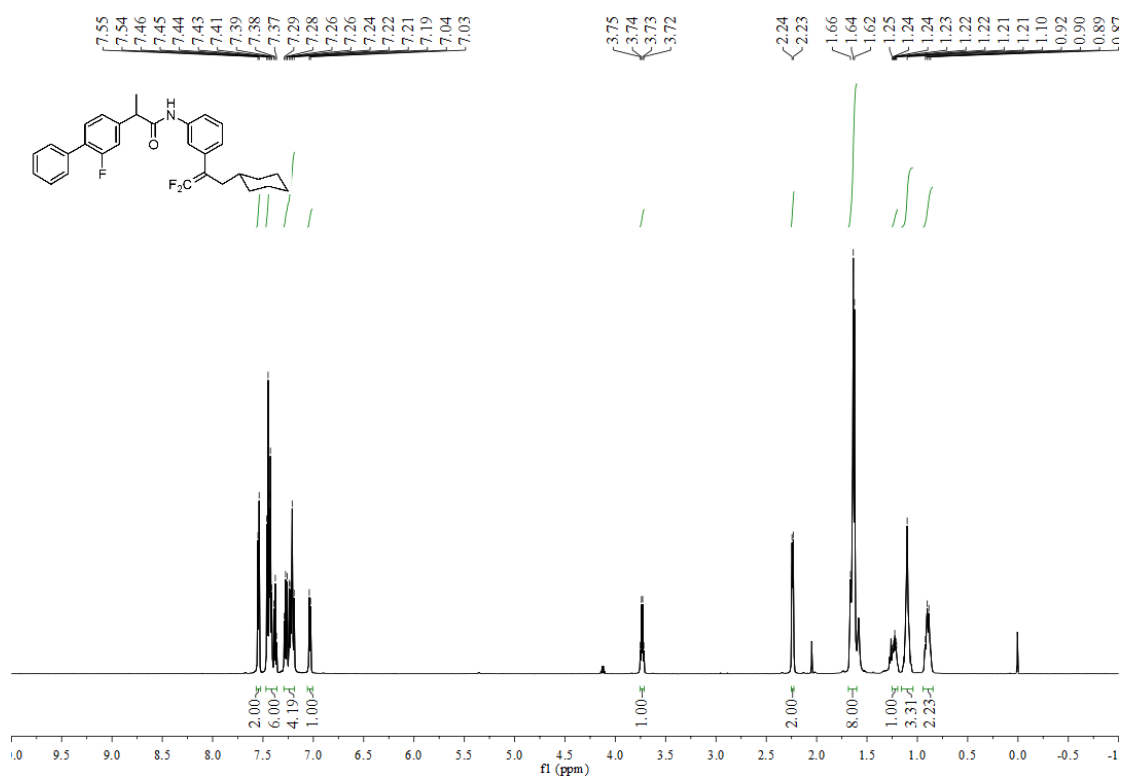

### <sup>13</sup>C NMR (151 MHz, CDCl<sub>3</sub>) spectrum of compound 48

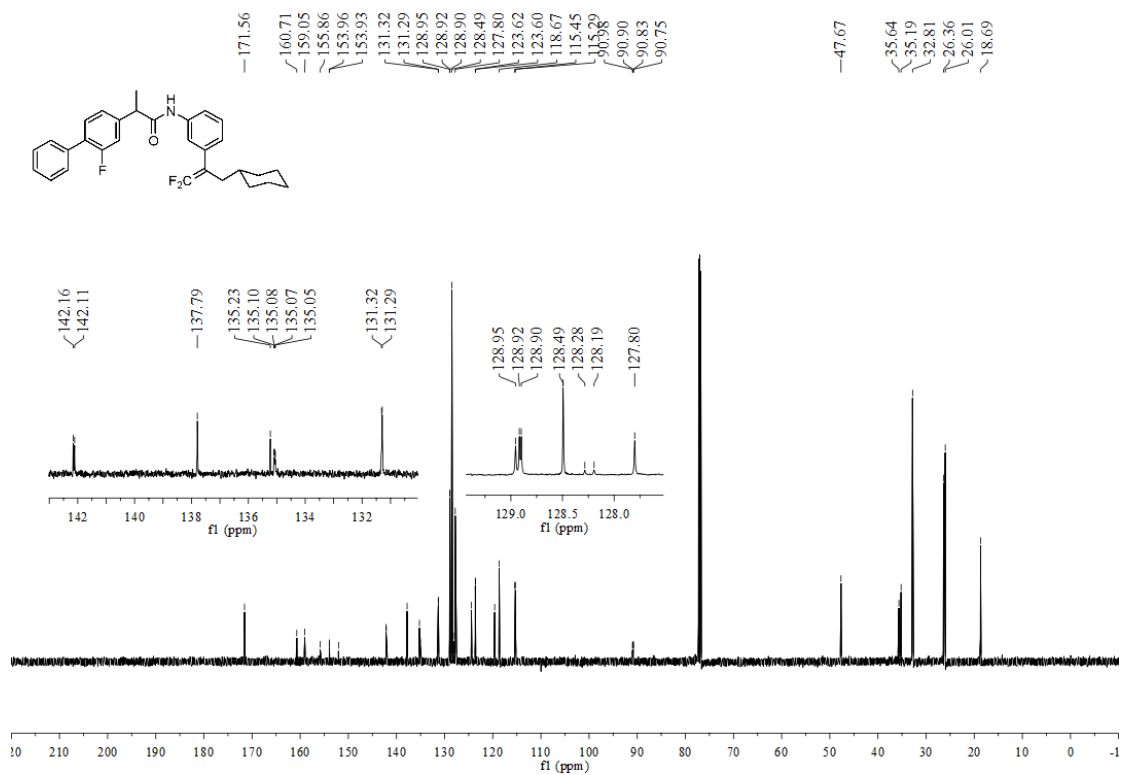

### <sup>19</sup>F NMR (564 MHz, CDCl<sub>3</sub>) spectrum of compound 48

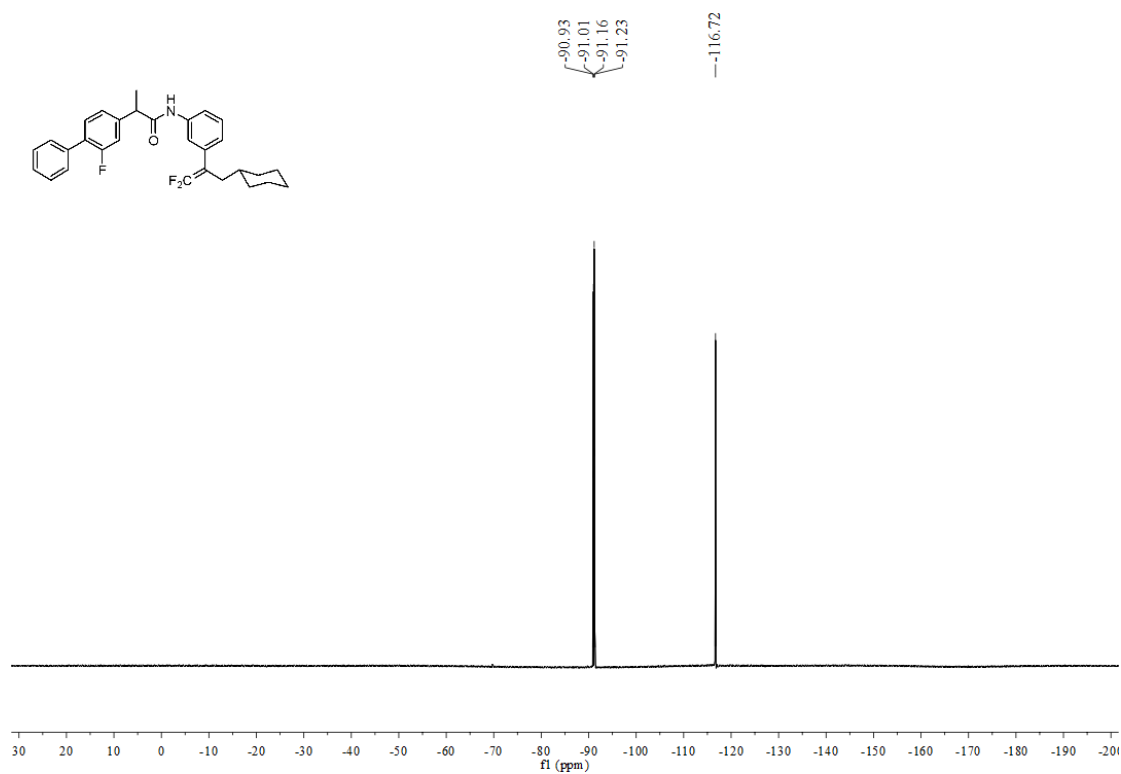

### <sup>1</sup>H NMR (600 MHz, CDCl<sub>3</sub>) spectrum of compound 49

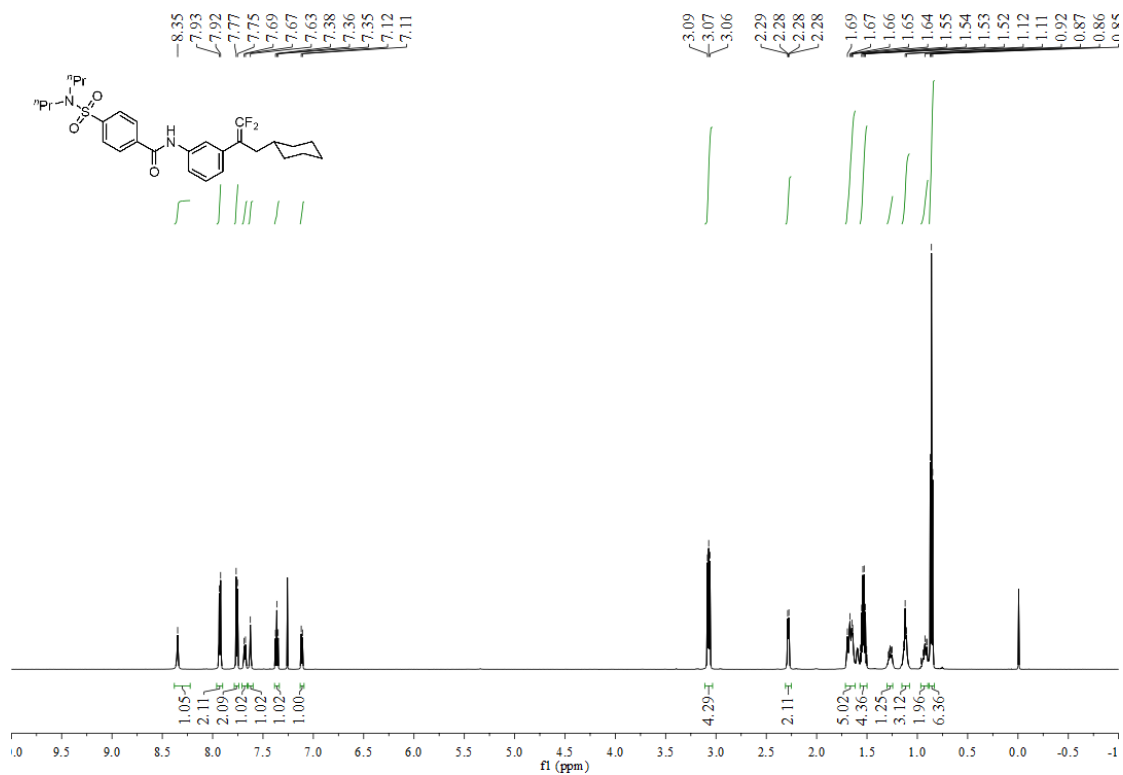

### <sup>13</sup>C NMR (151 MHz, CDCl<sub>3</sub>) spectrum of compound 49

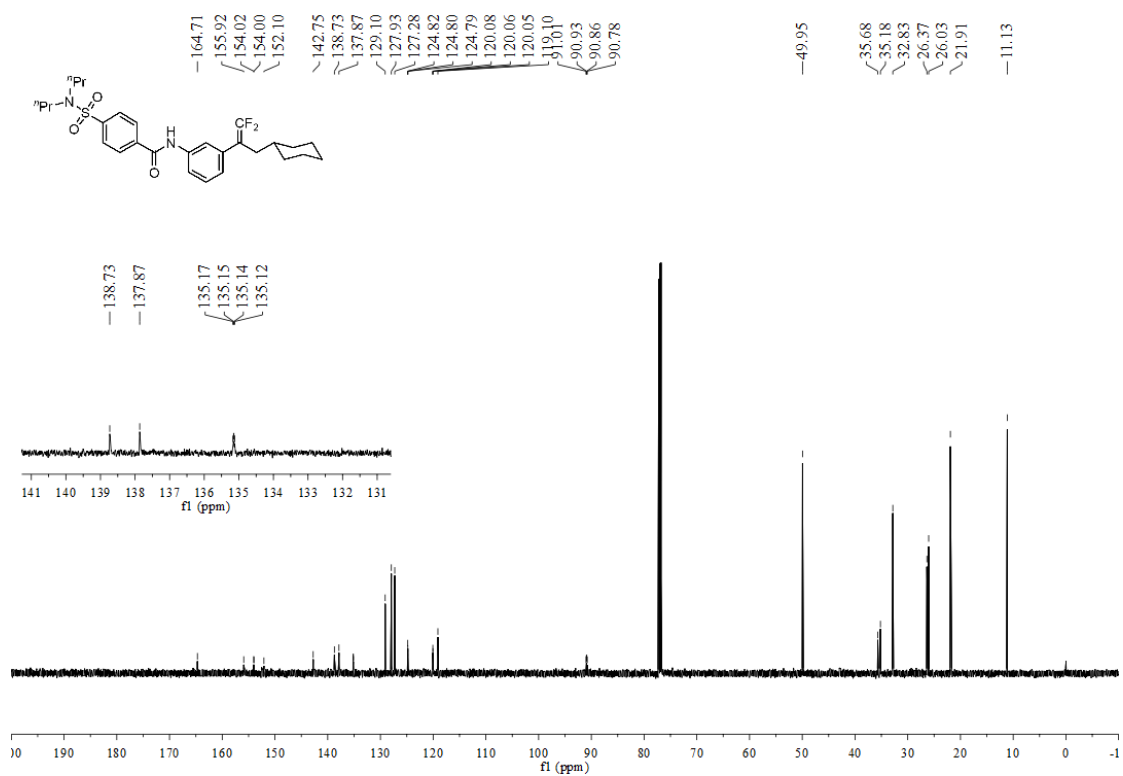

### $^{19}\text{F}$ NMR (564 MHz, $\text{CDCl}_3$ ) spectrum of compound 49

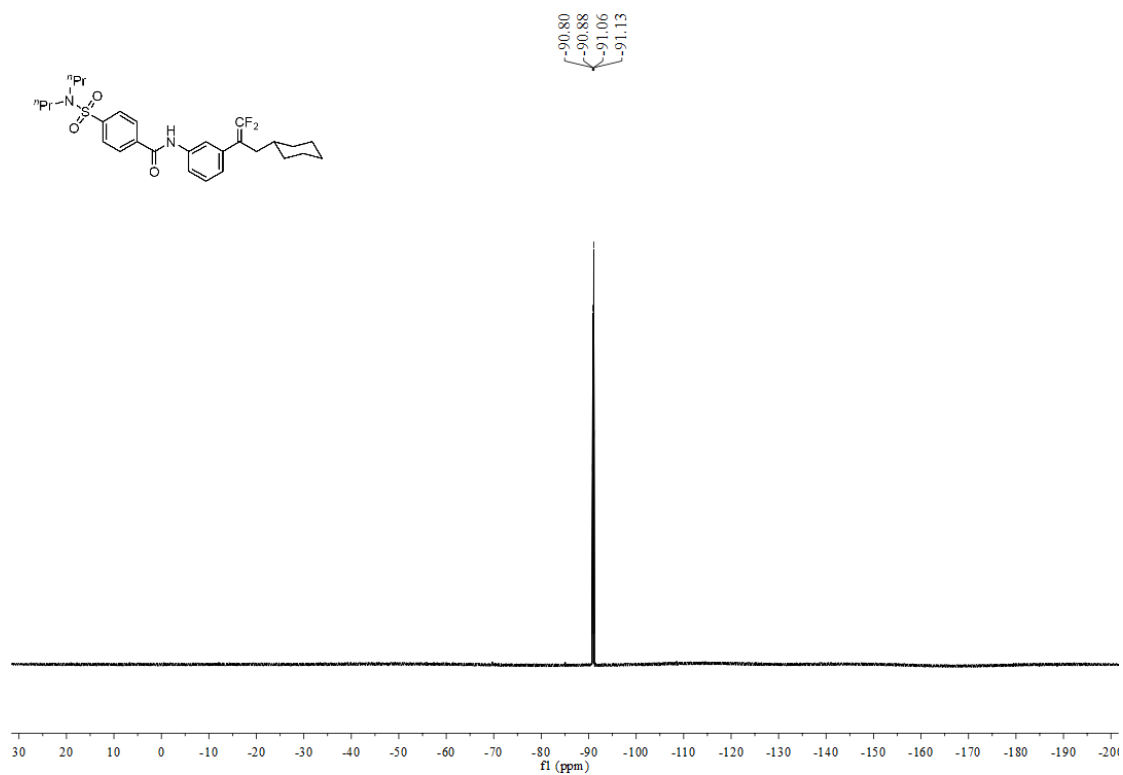

### $^1\text{H}$ NMR (600 MHz, $\text{CDCl}_3$ ) spectrum of compound 50

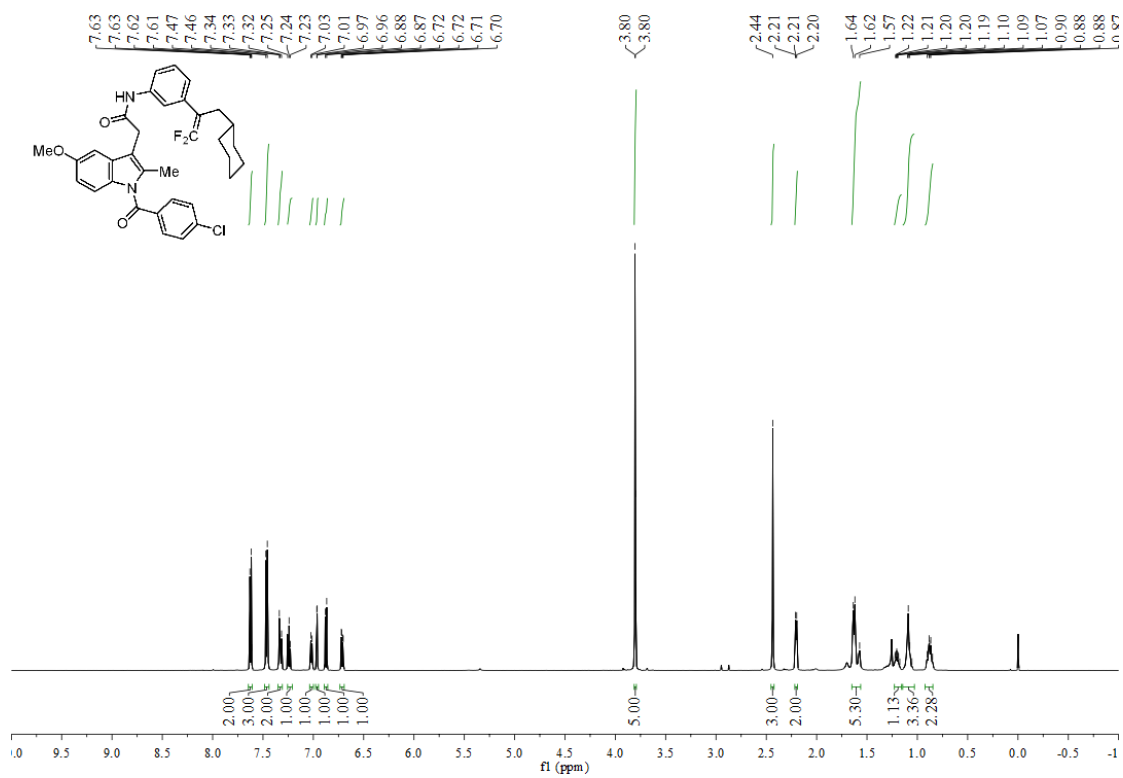

**$^{13}\text{C}$  NMR (151 MHz,  $\text{CDCl}_3$ ) spectrum of compound 50**

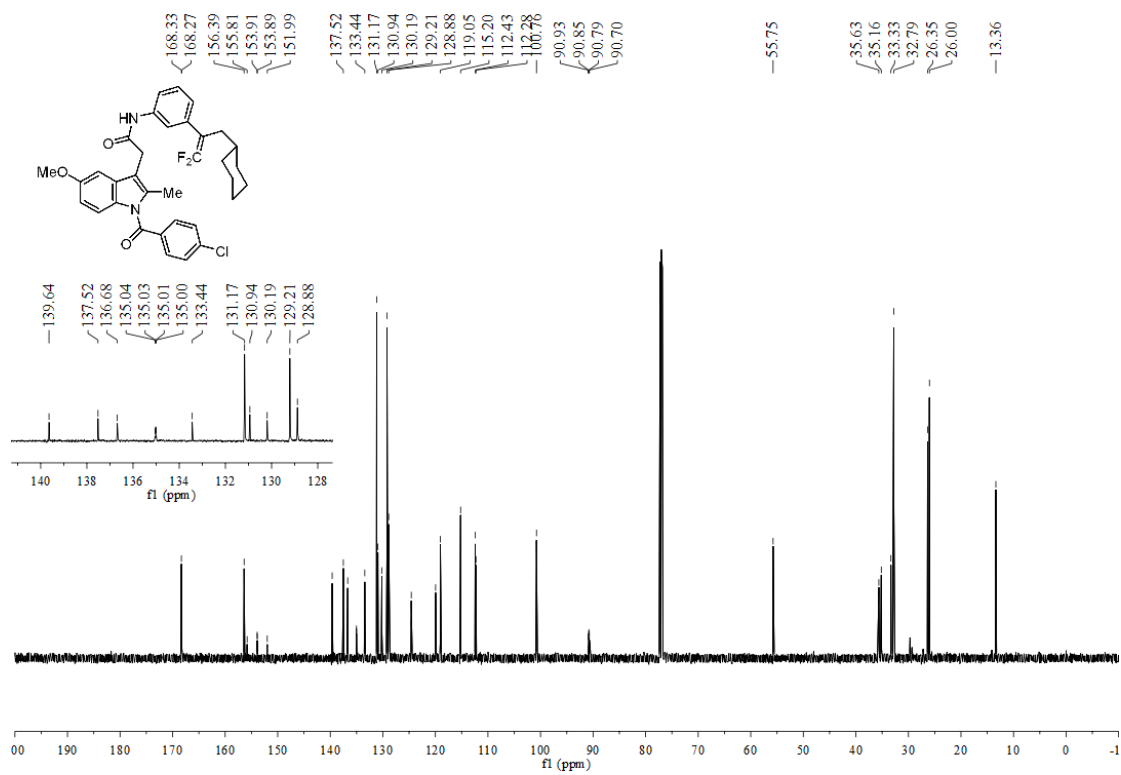

**$^{19}\text{F}$  NMR (564 MHz,  $\text{CDCl}_3$ ) spectrum of compound 50**

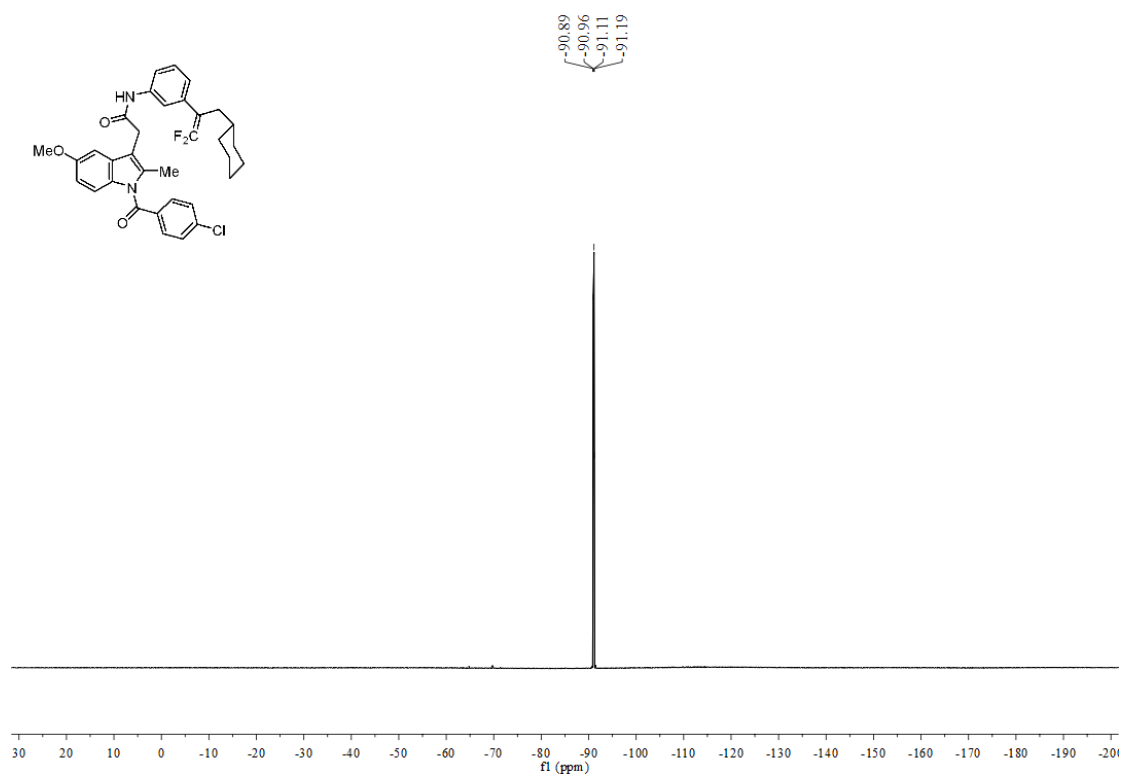

### <sup>1</sup>H NMR (600 MHz, CDCl<sub>3</sub>) spectrum of compound 51

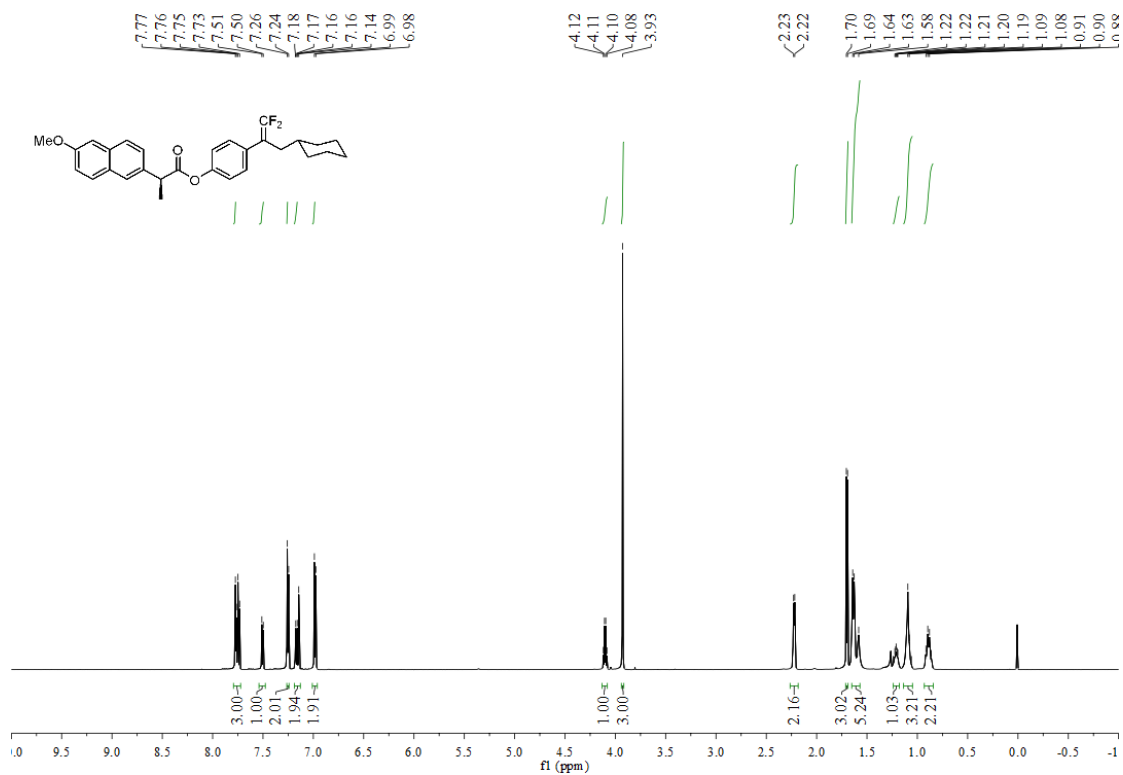

### <sup>13</sup>C NMR (151 MHz, CDCl<sub>3</sub>) spectrum of compound 51

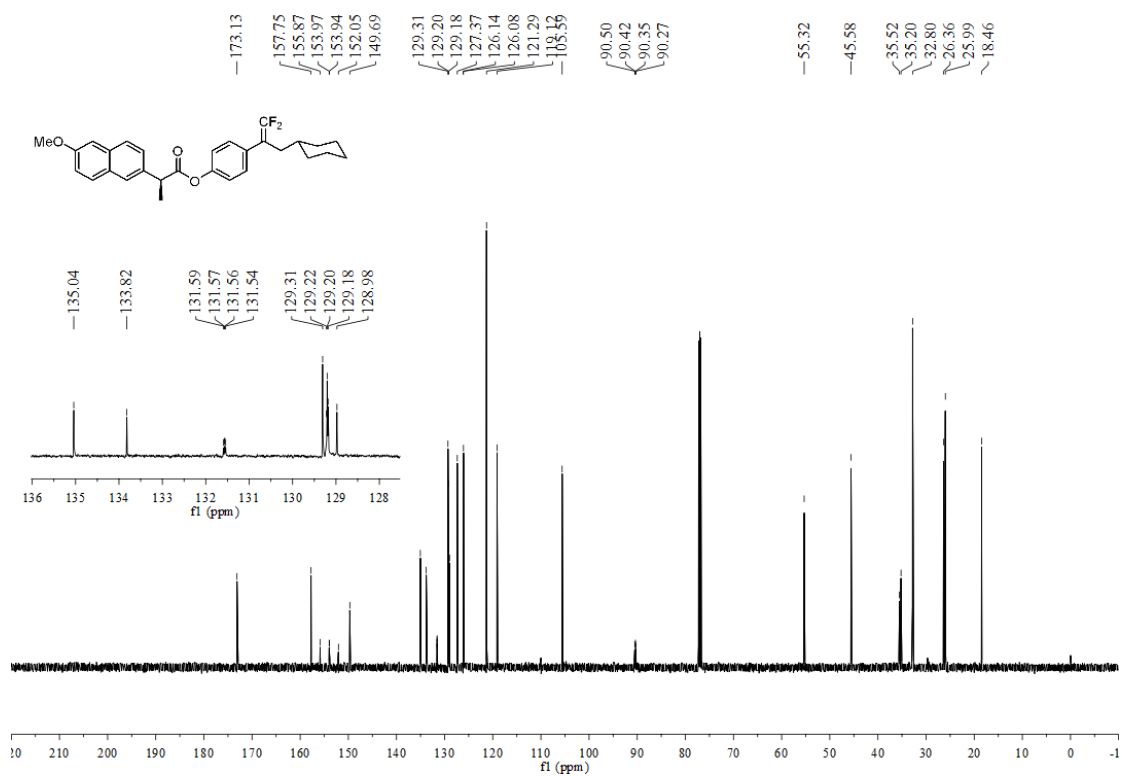



### <sup>19</sup>F NMR (564 MHz, CDCl<sub>3</sub>) spectrum of compound 51

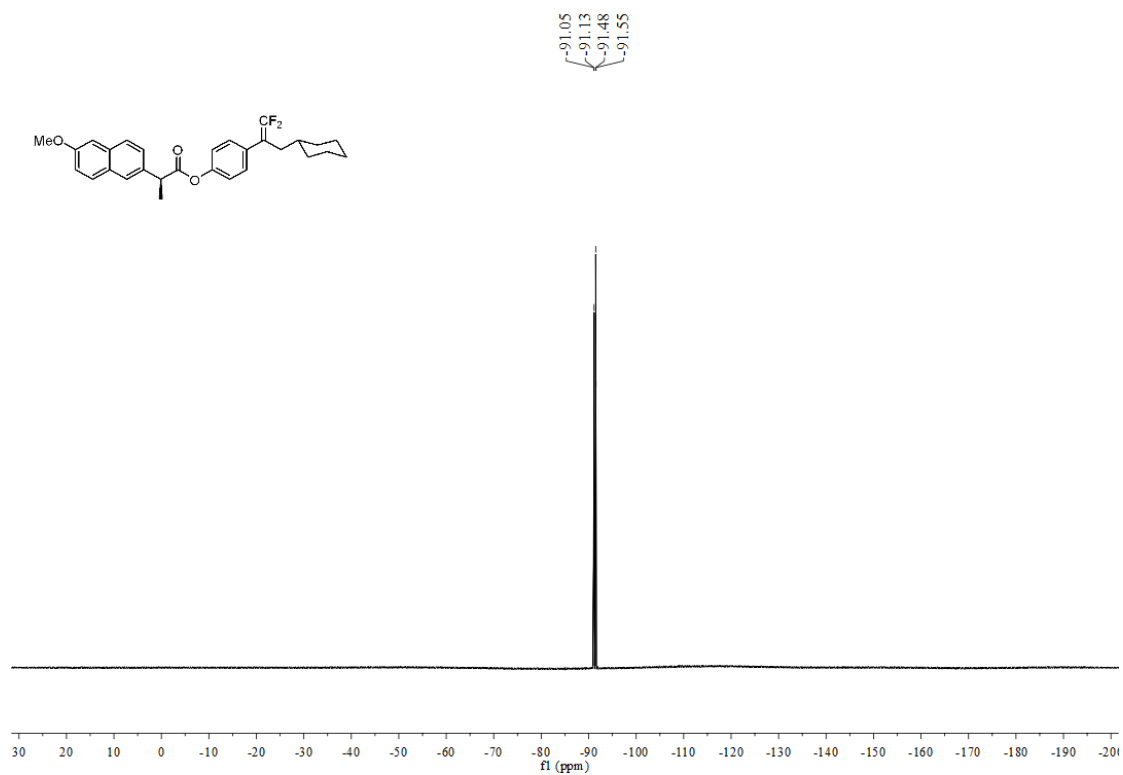

### <sup>1</sup>H NMR (600 MHz, CDCl<sub>3</sub>) spectrum of compound 52

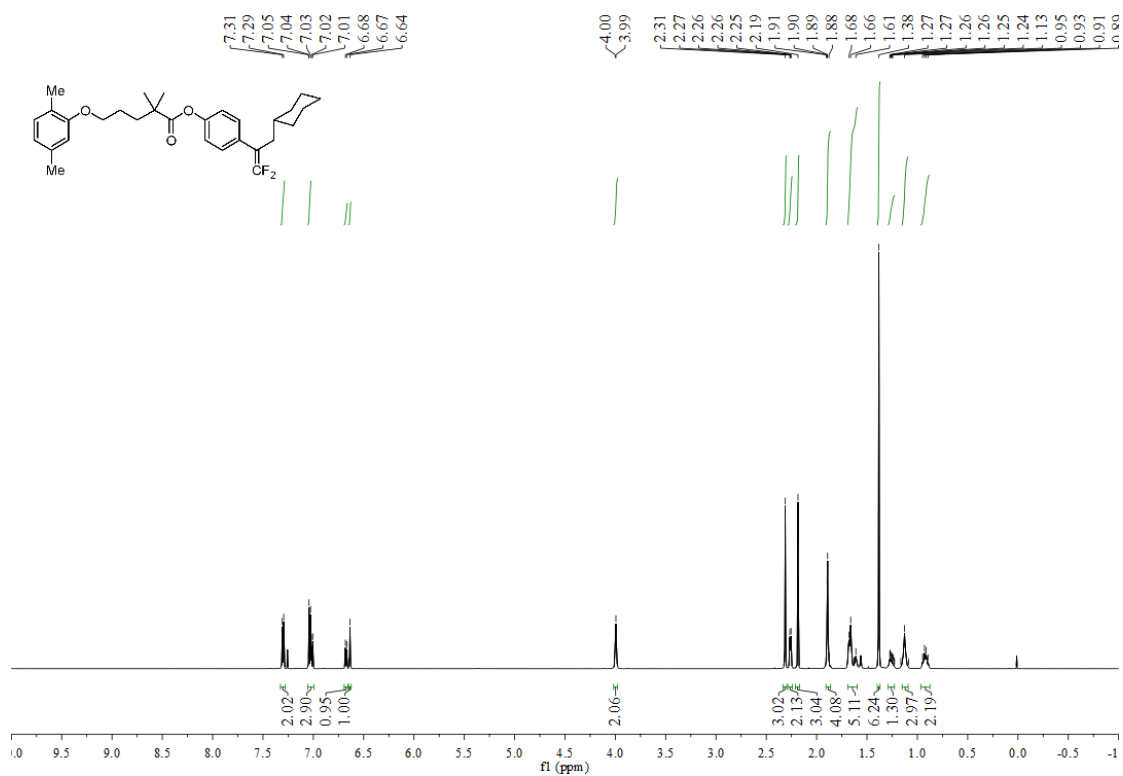

### <sup>13</sup>C NMR (151 MHz, CDCl<sub>3</sub>) spectrum of compound 52

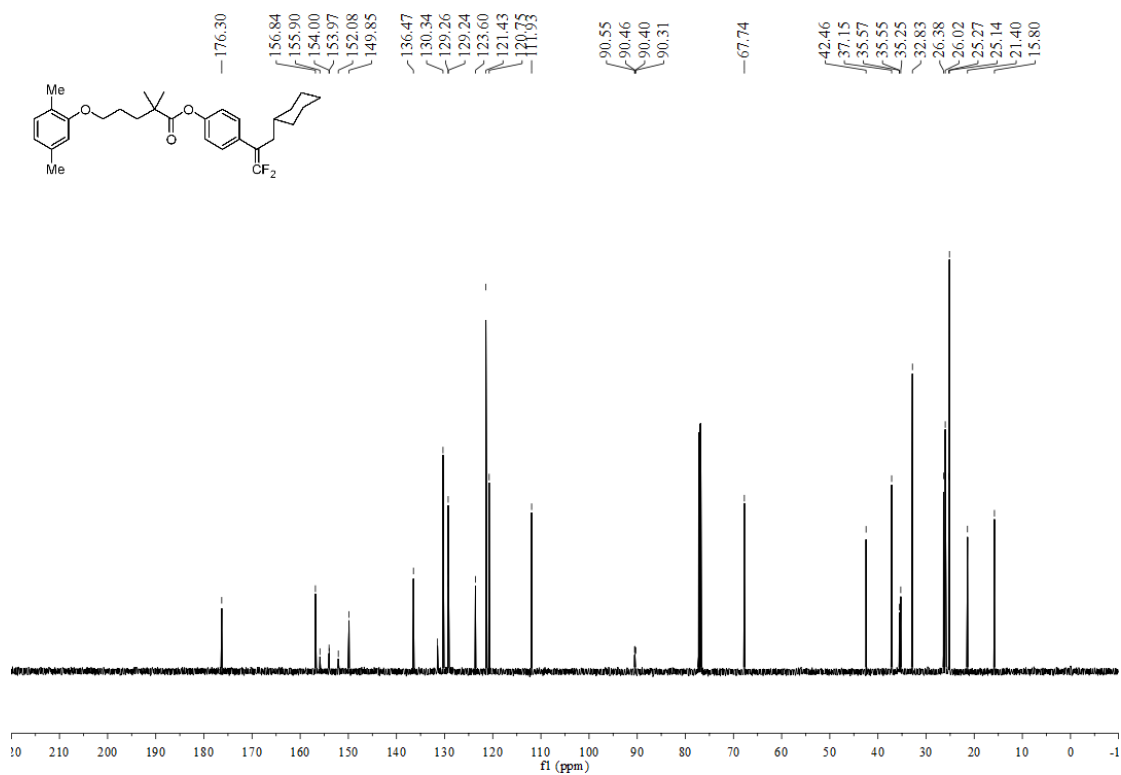

### <sup>19</sup>F NMR (564 MHz, CDCl<sub>3</sub>) spectrum of compound 52

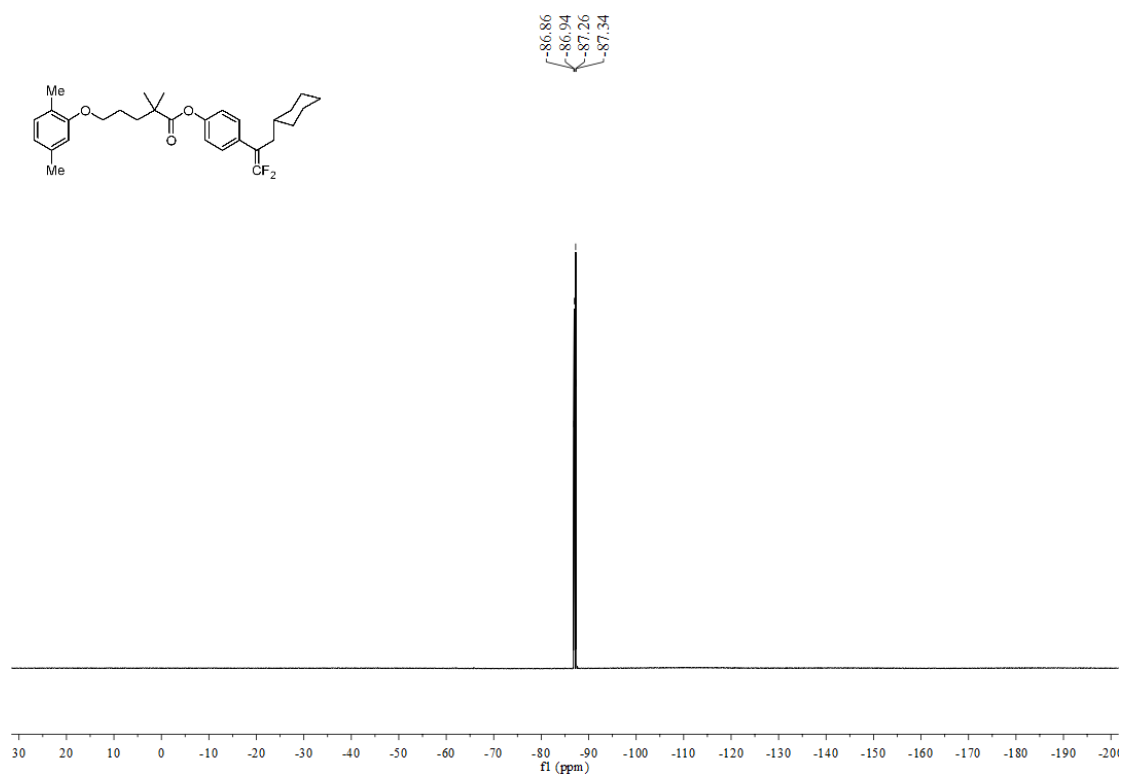

**<sup>1</sup>H NMR (600 MHz, CDCl<sub>3</sub>) spectrum of compound 53**

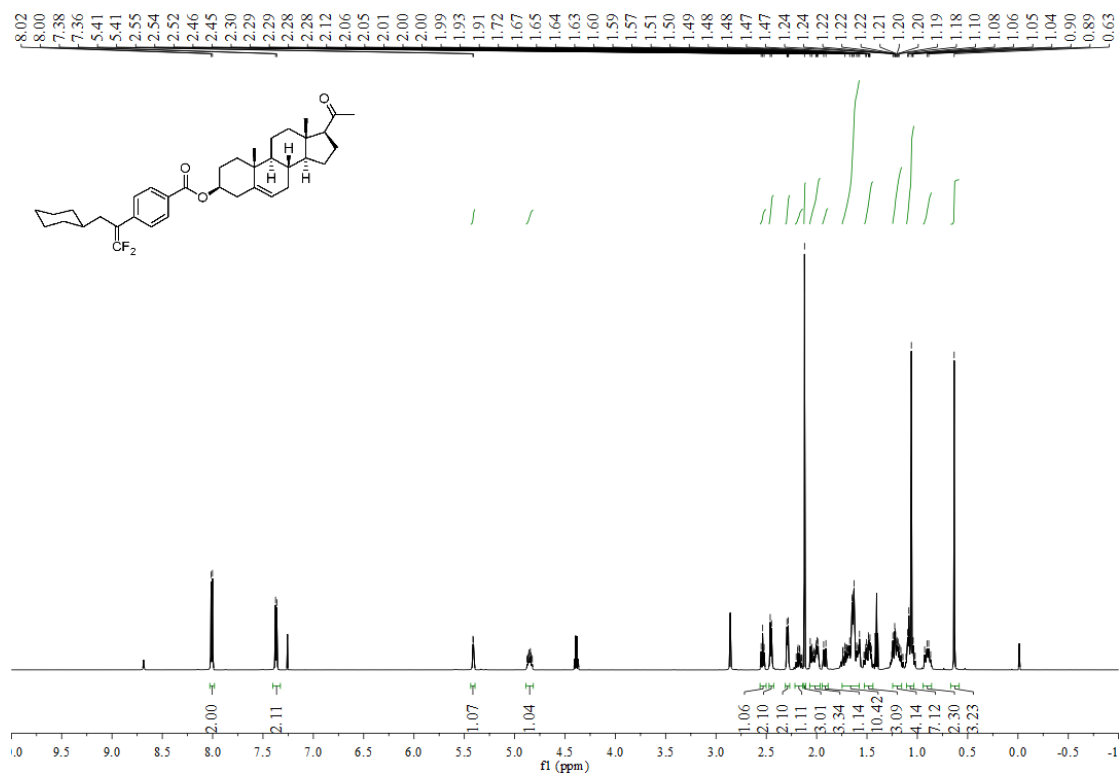

**<sup>13</sup>C NMR (151 MHz, CDCl<sub>3</sub>) spectrum of compound 53**

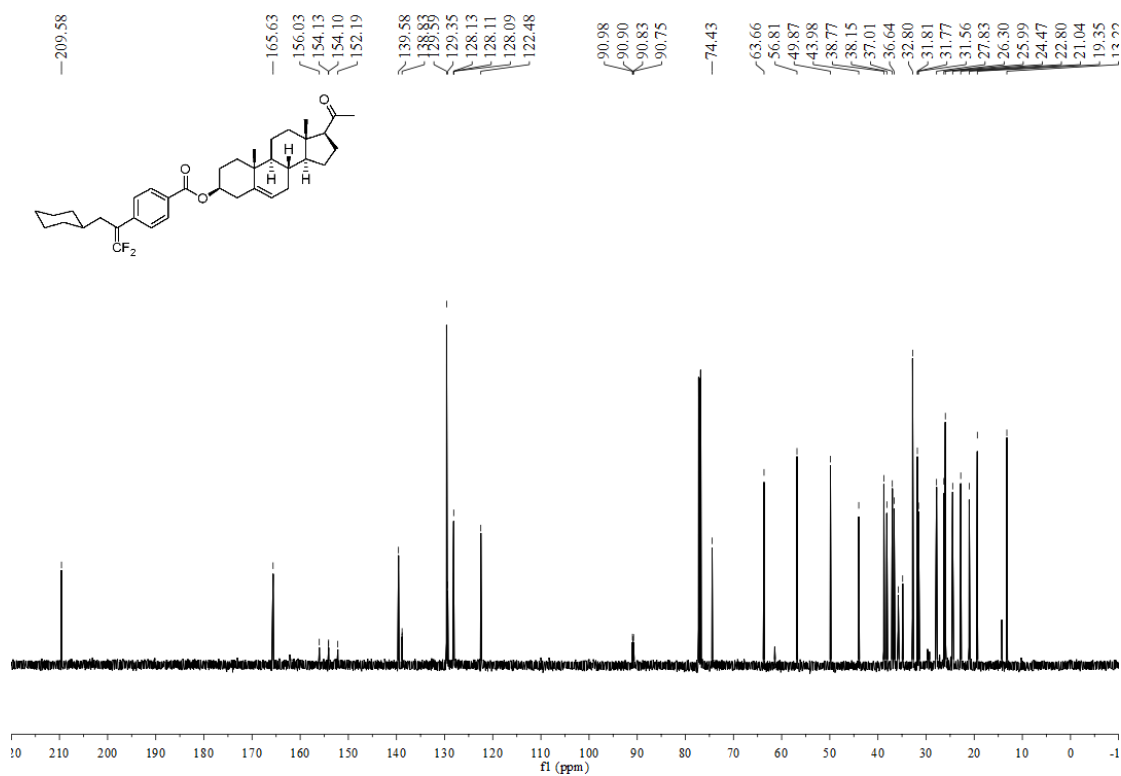

**<sup>19</sup>F NMR (564 MHz, CDCl<sub>3</sub>) spectrum of compound 53**

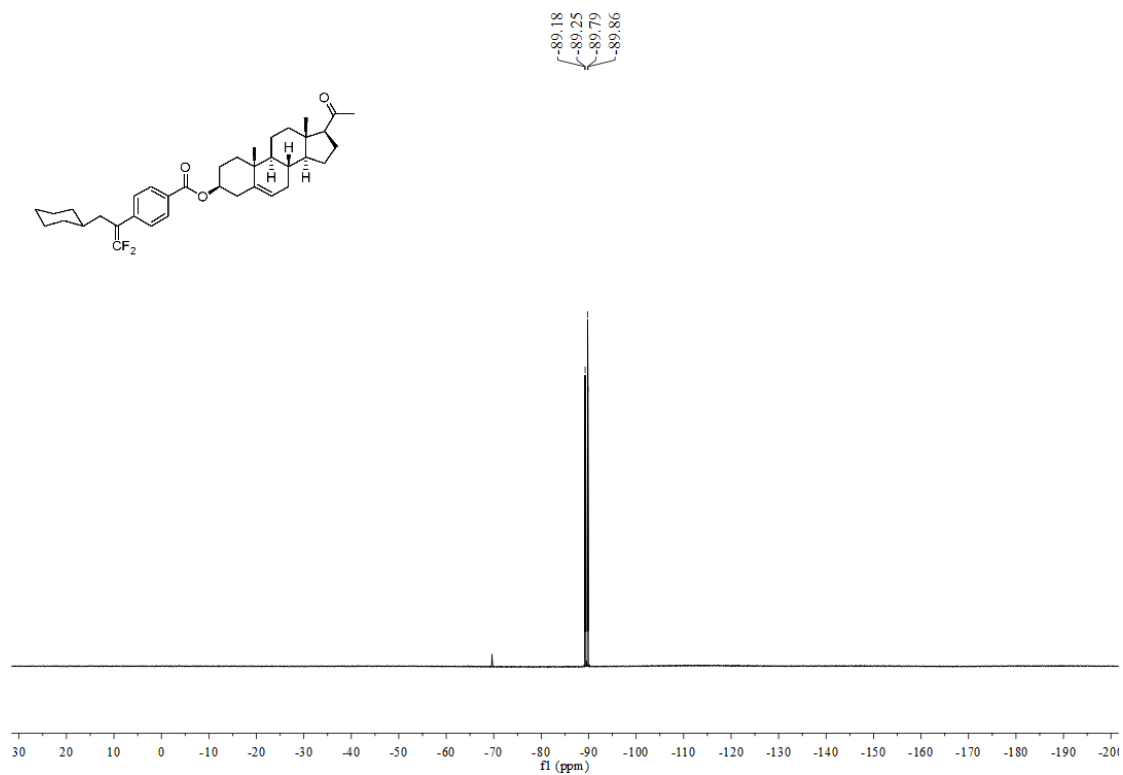

**<sup>1</sup>H NMR (600 MHz, CDCl<sub>3</sub>) spectrum of compound 54**

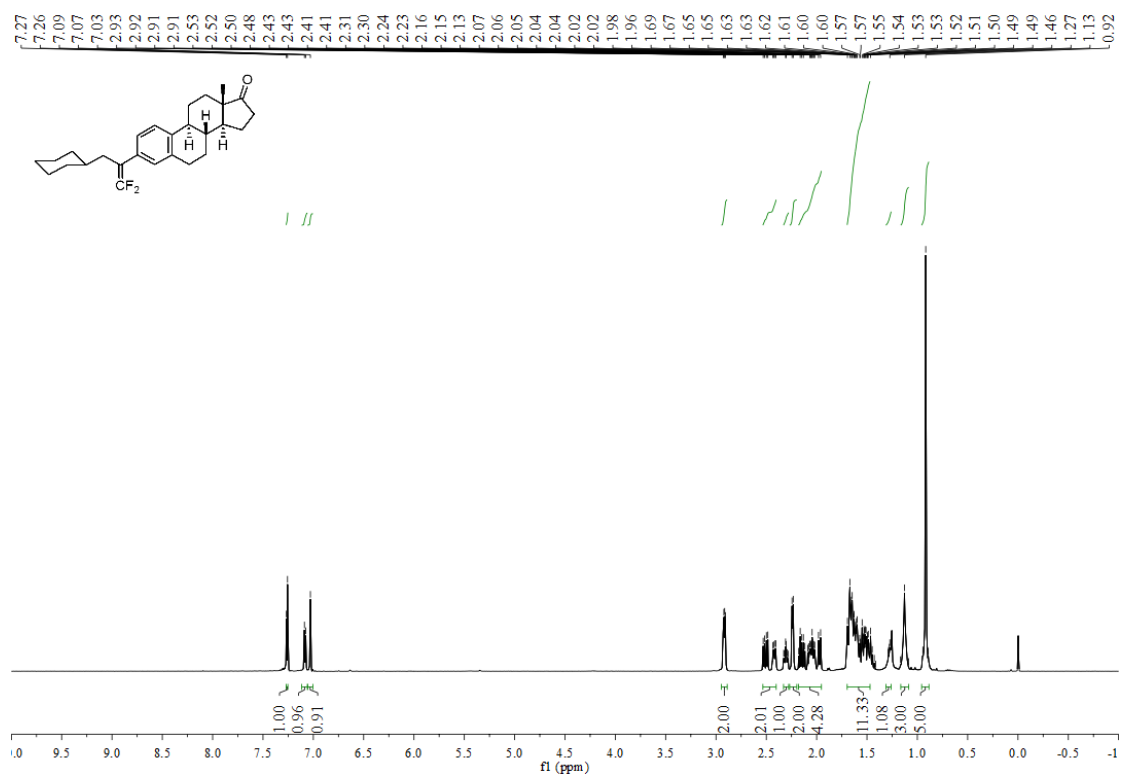

### <sup>13</sup>C NMR (151 MHz, CDCl<sub>3</sub>) spectrum of compound 54

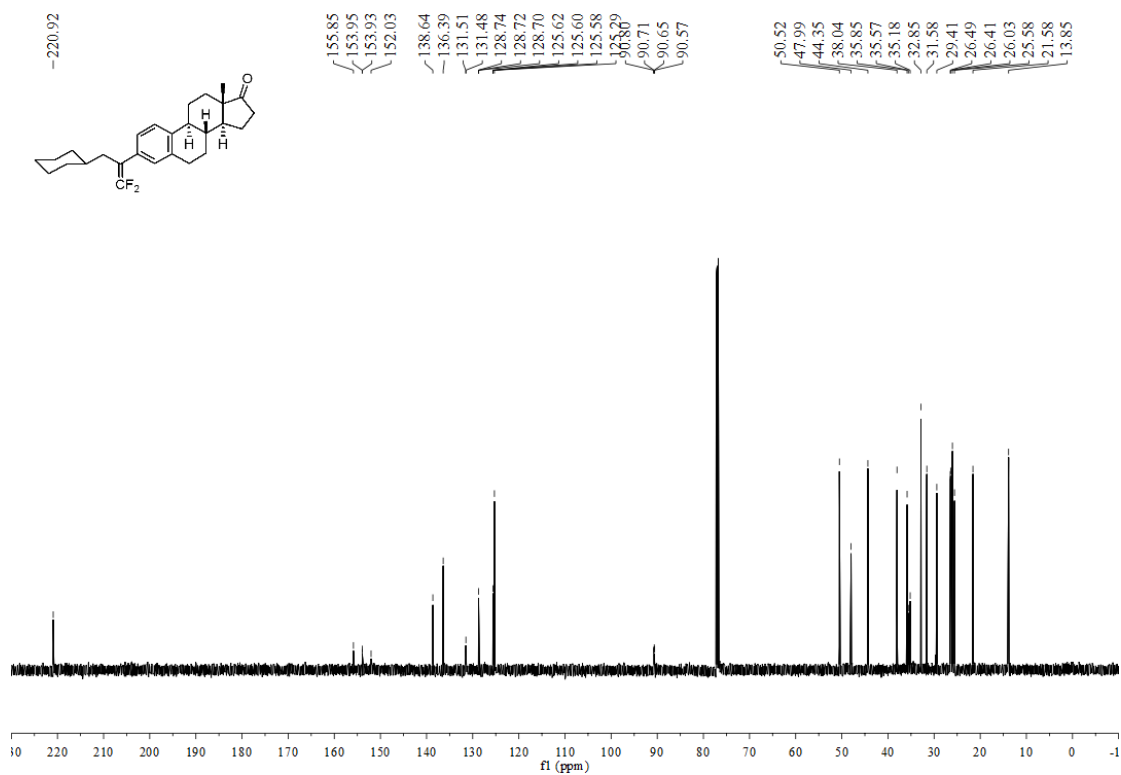

### <sup>19</sup>F NMR (564 MHz, CDCl<sub>3</sub>) spectrum of compound 54

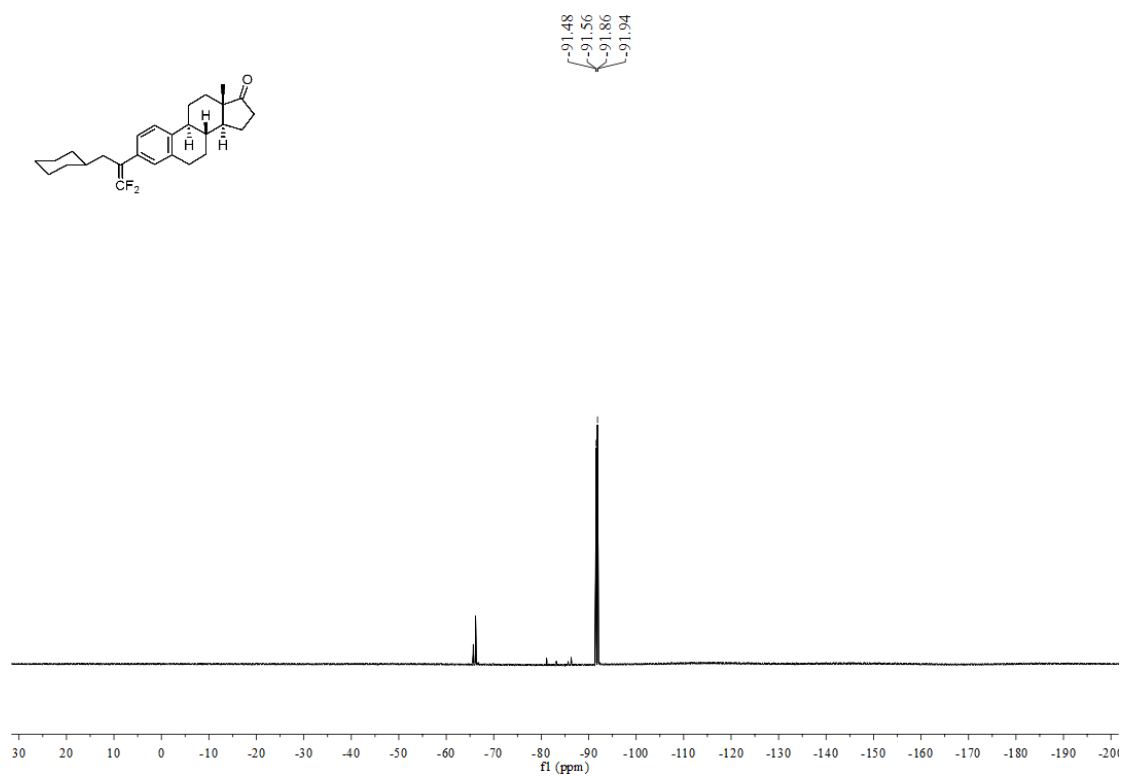

### <sup>1</sup>H NMR (600 MHz, CDCl<sub>3</sub>) spectrum of compound 55

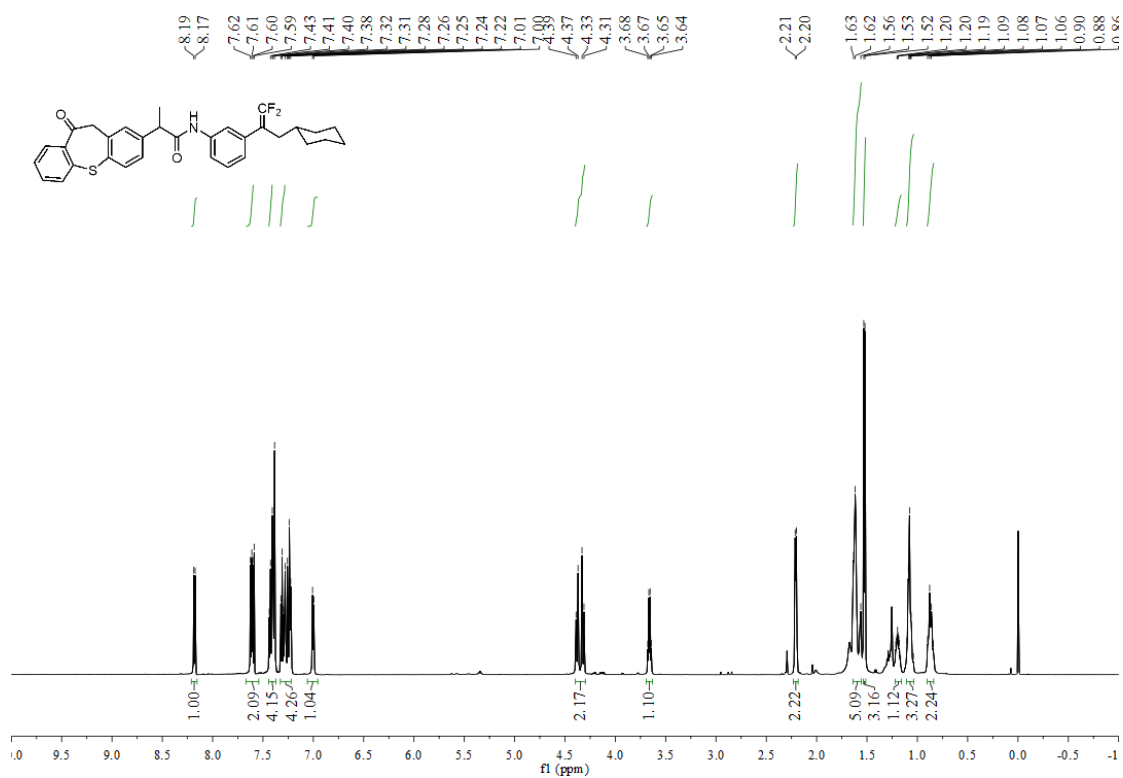

### <sup>13</sup>C NMR (151 MHz, CDCl<sub>3</sub>) spectrum of compound 55

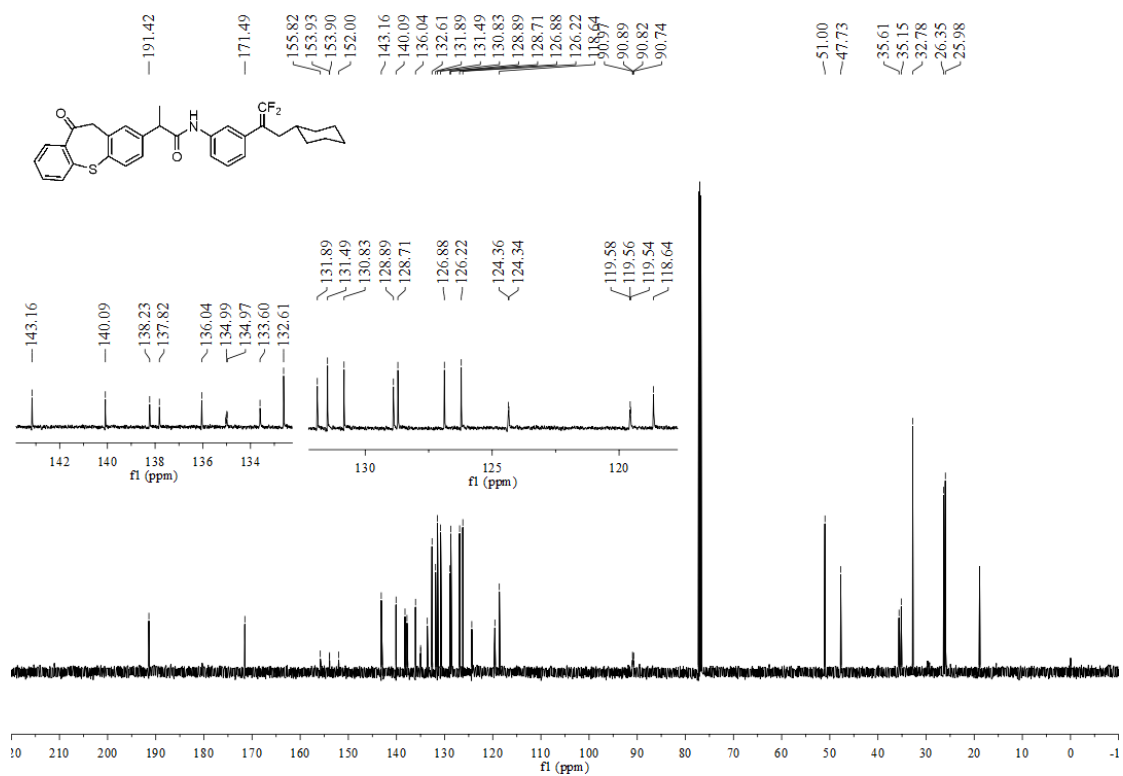

**<sup>19</sup>F NMR (564 MHz, CDCl<sub>3</sub>) spectrum of compound 55**

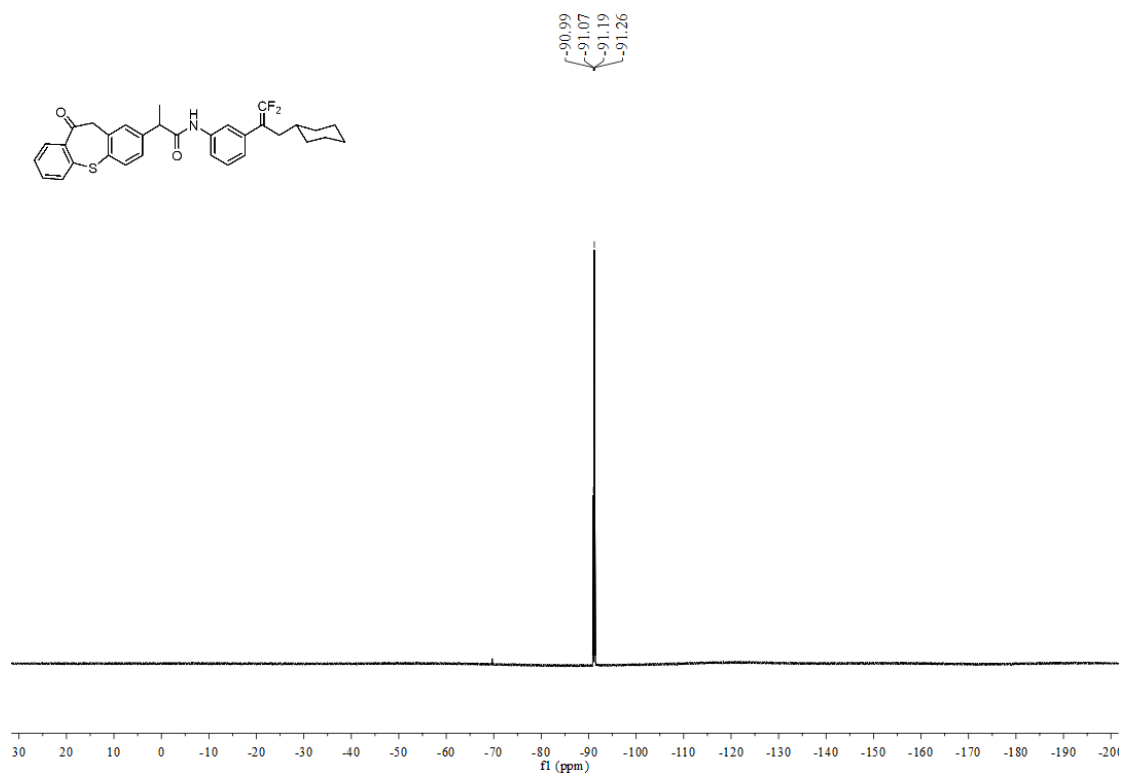

**<sup>1</sup>H NMR (600 MHz, CDCl<sub>3</sub>) spectrum of compound 56**

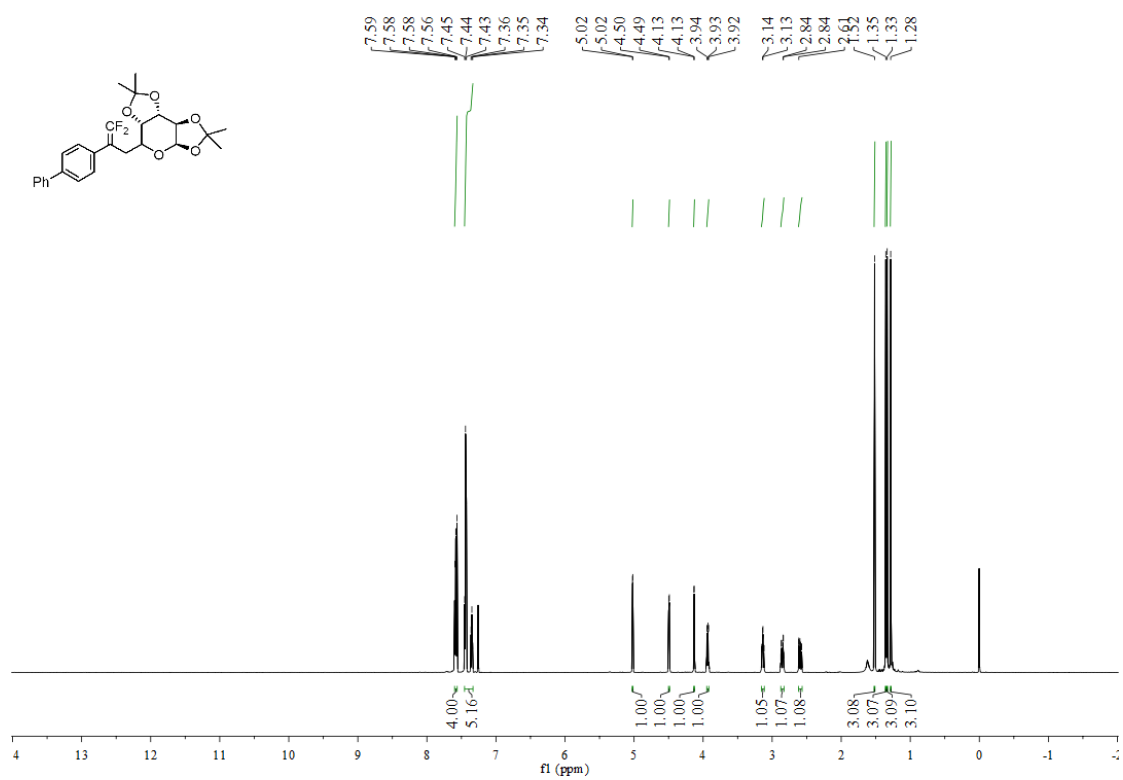

### <sup>13</sup>C NMR (151 MHz, CDCl<sub>3</sub>) spectrum of compound 56

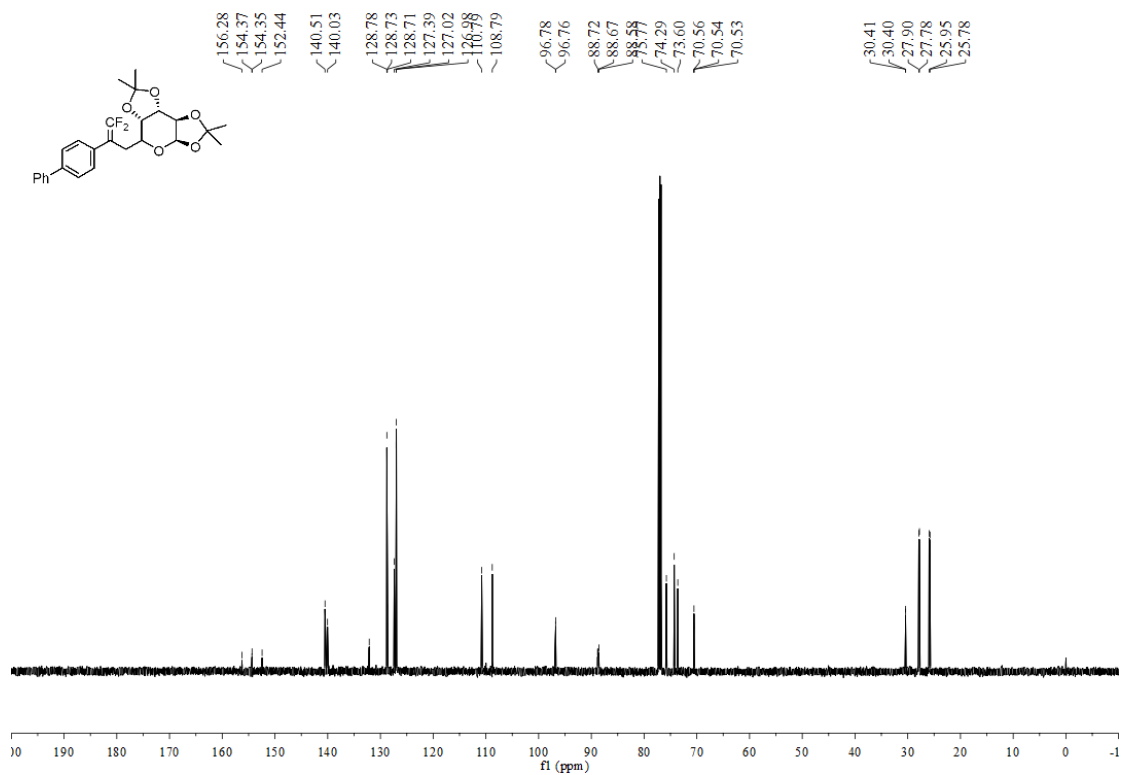

### <sup>19</sup>F NMR (564 MHz, CDCl<sub>3</sub>) spectrum of compound 56

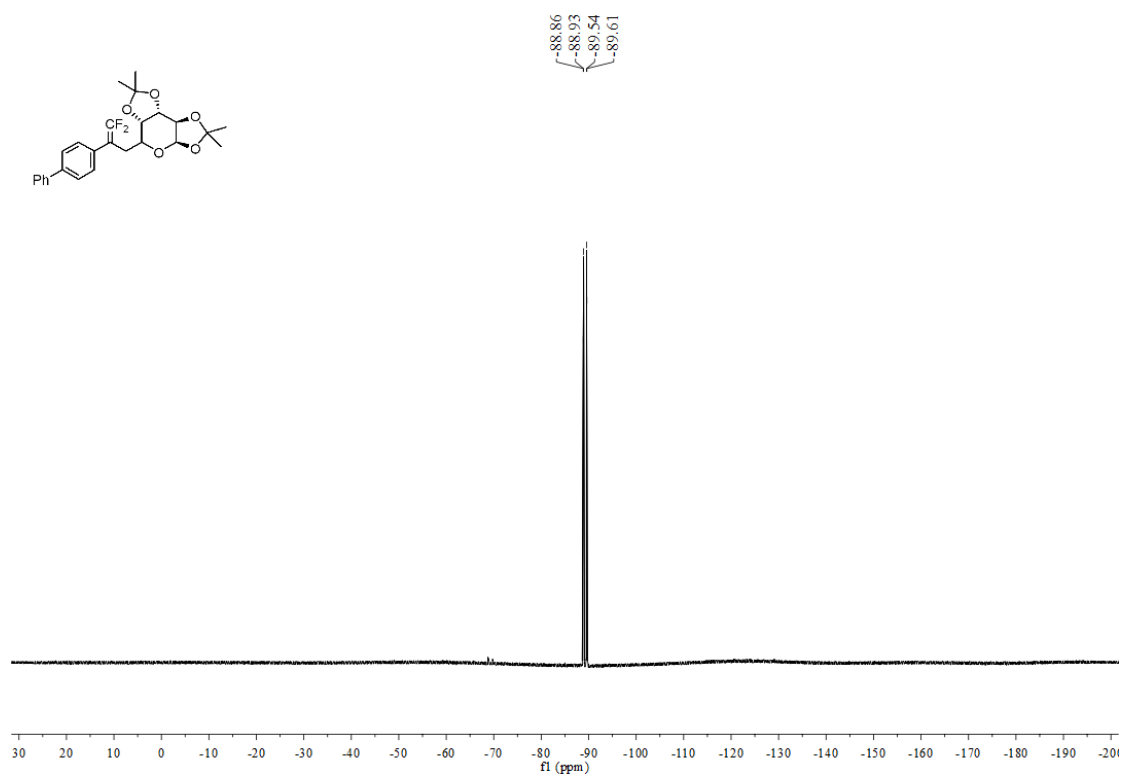



### <sup>1</sup>H NMR (600 MHz, CDCl<sub>3</sub>) spectrum of compound 57

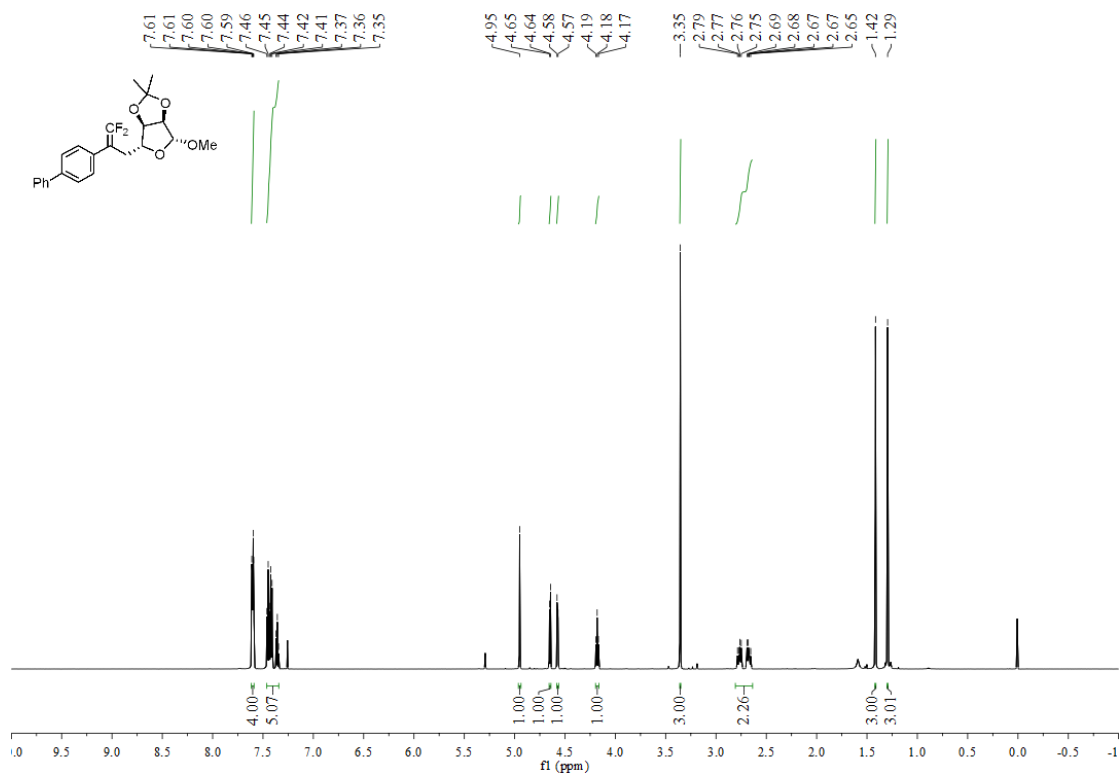

### <sup>13</sup>C NMR (151 MHz, CDCl<sub>3</sub>) spectrum of compound 57

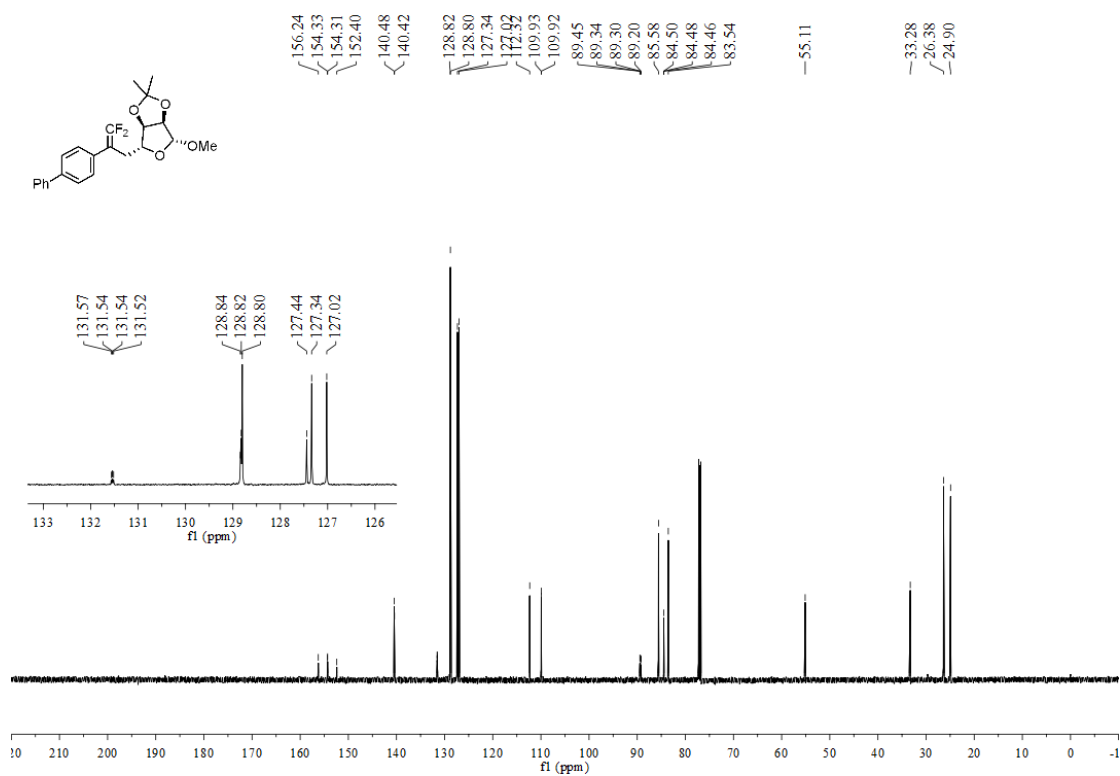

### $^{19}\text{F}$ NMR (564 MHz, $\text{CDCl}_3$ ) spectrum of compound 57

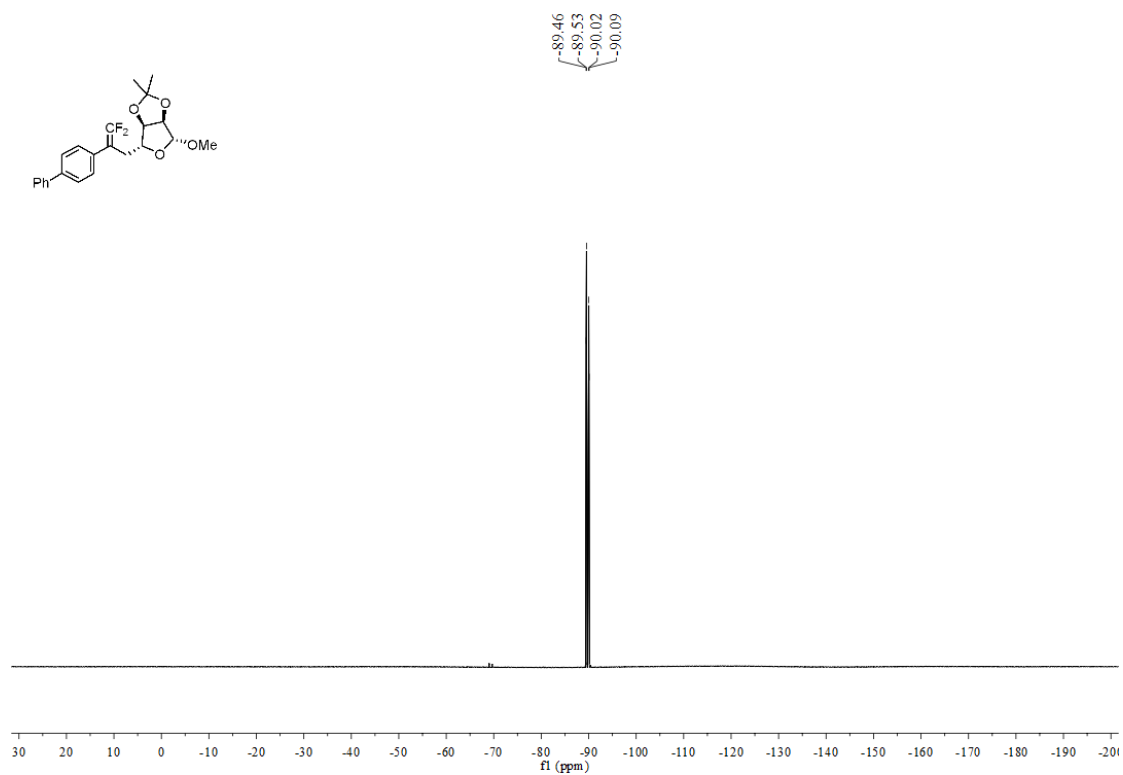

### $^1\text{H}$ NMR (600 MHz, $\text{CDCl}_3$ ) spectrum of compound 59

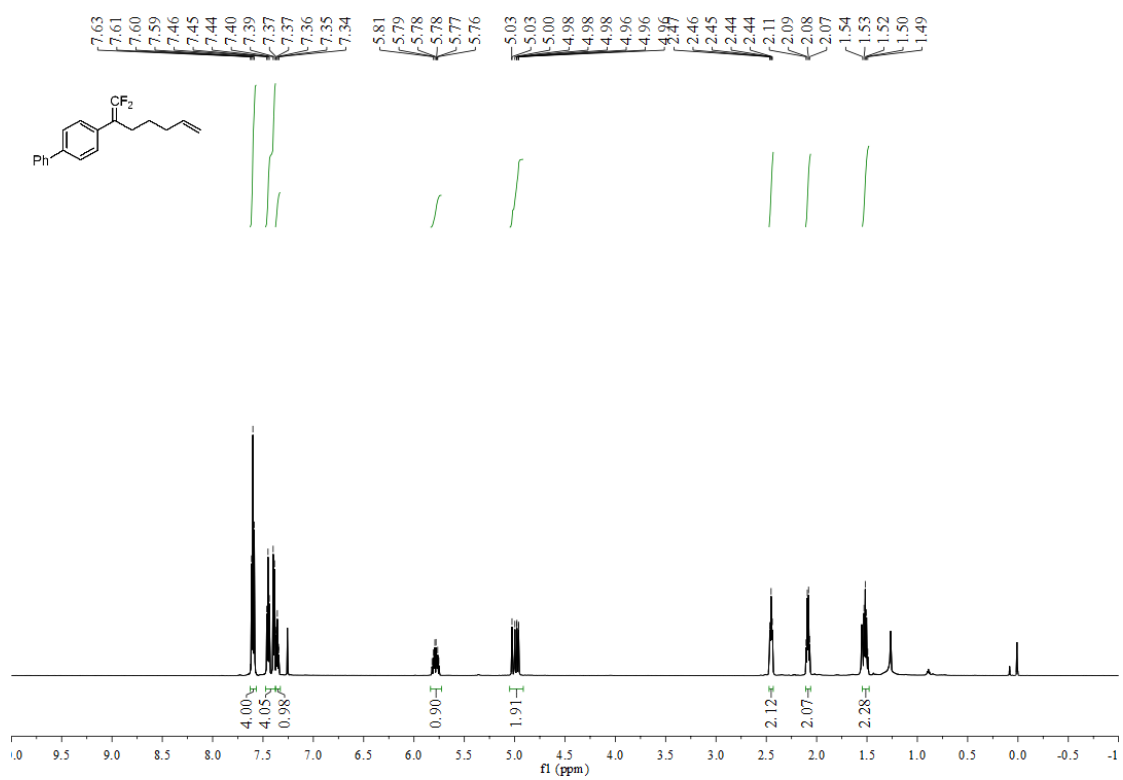

### <sup>13</sup>C NMR (151 MHz, CDCl<sub>3</sub>) spectrum of compound 59

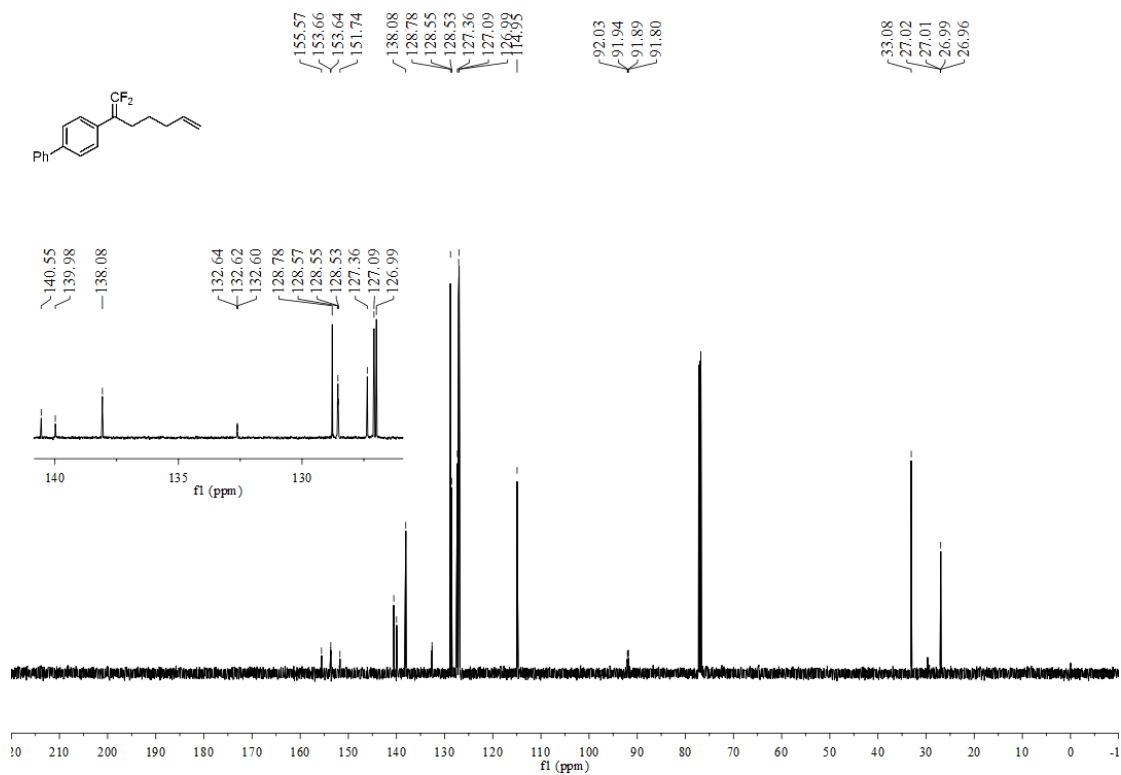

### <sup>19</sup>F NMR (564 MHz, CDCl<sub>3</sub>) spectrum of compound 59

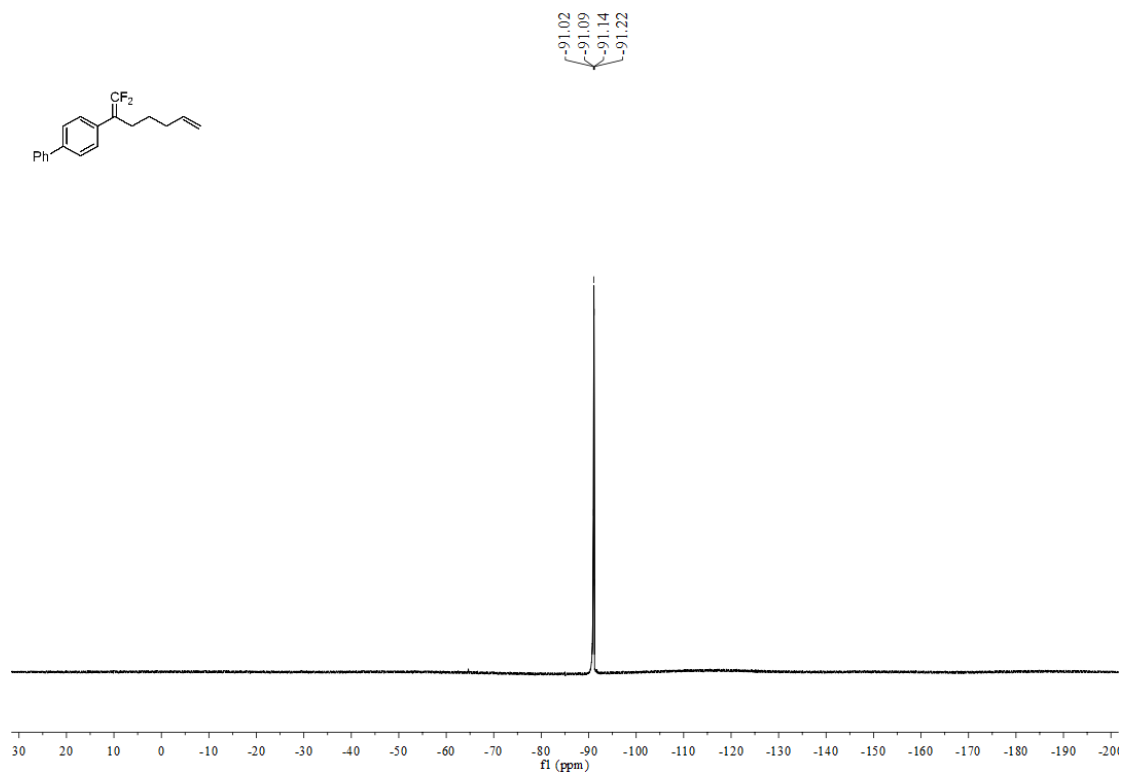

### <sup>1</sup>H NMR (600 MHz, CDCl<sub>3</sub>) spectrum of compound 60

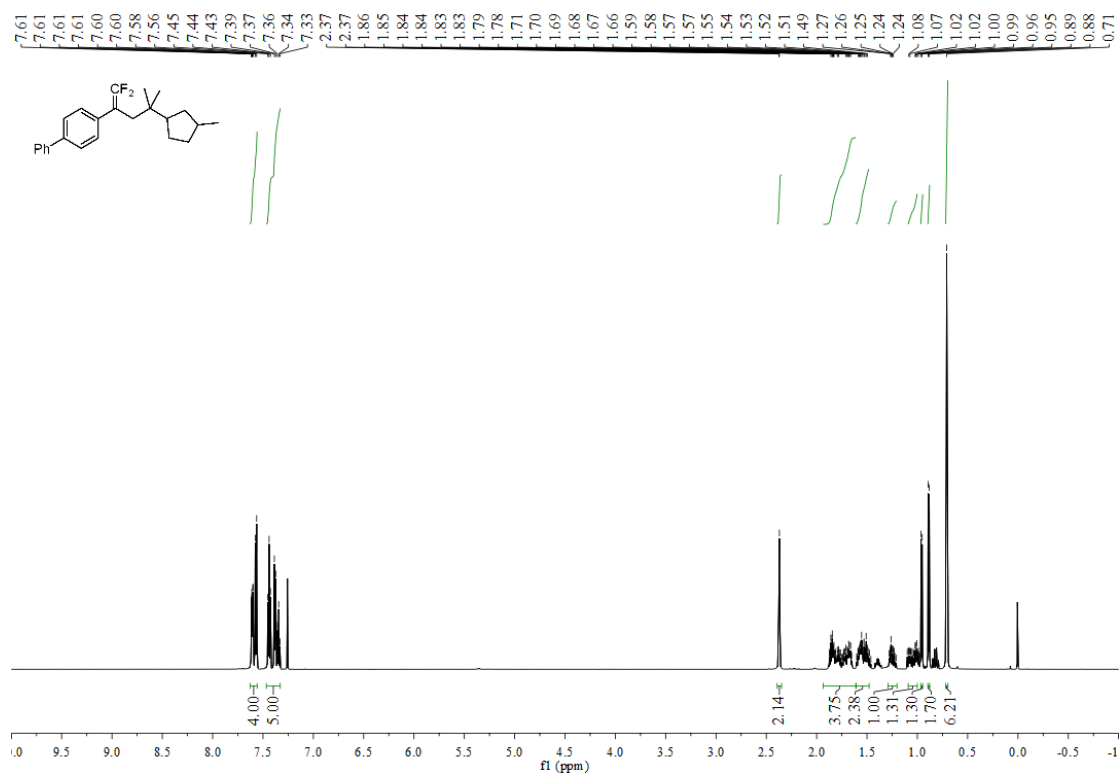

### <sup>13</sup>C NMR (151 MHz, CDCl<sub>3</sub>) spectrum of compound 60

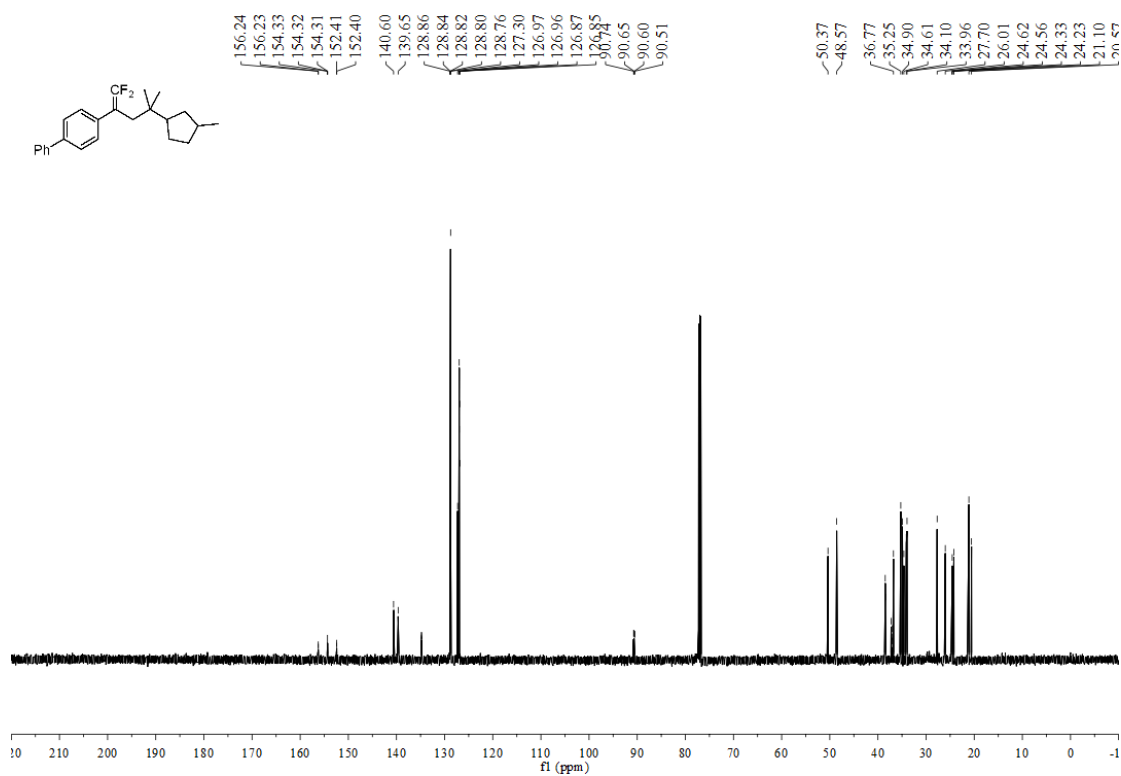

**<sup>19</sup>F NMR (564 MHz, CDCl<sub>3</sub>) spectrum of compound 60**

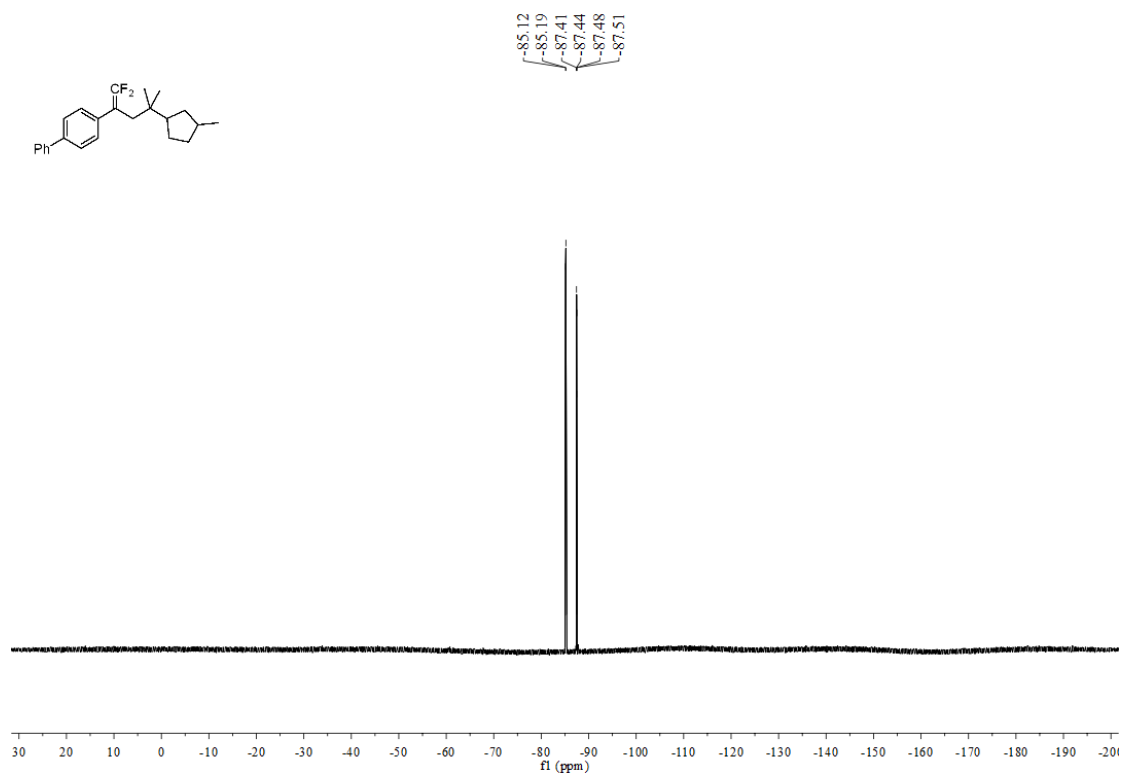

Supplement: d3qo01490h1.pdf [file d3qo01490h1.pdf]
